# Supplementary material for: Transcriptome and Metabolome Analyses Revealed the Response Mechanism of Quinoa Seedlings to Different Phosphorus Stresses
Source: MDPI journal article supplement (doi:10.3390/ijms23094704), 2022-04-24
Supplement: s1 [file s1]

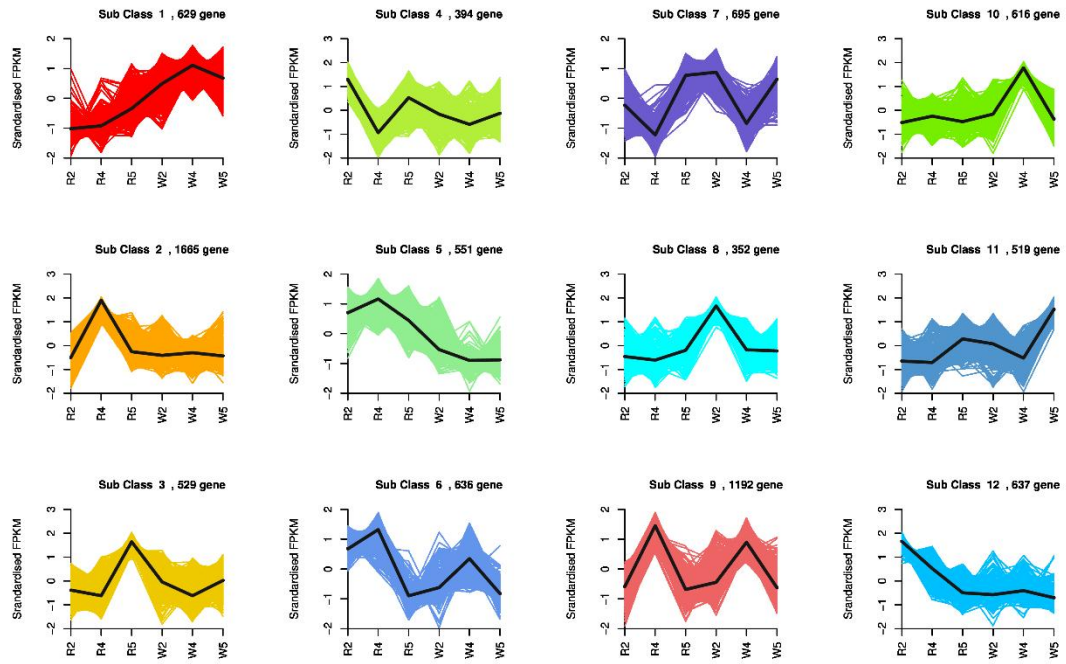

Figure S6. K-means clustering diagram. The abscissa represents the sample. The ordinate represents centralization and standardization expression.
