# Supplementary material for: Transcriptome and Metabolome Analyses Revealed the Response Mechanism of Quinoa Seedlings to Different Phosphorus Stresses
Source: MDPI journal article supplement (doi:10.3390/ijms23094704), 2022-04-24
Supplement: s1 [file s1]

R2\_vs\_R4 VIP score Plot

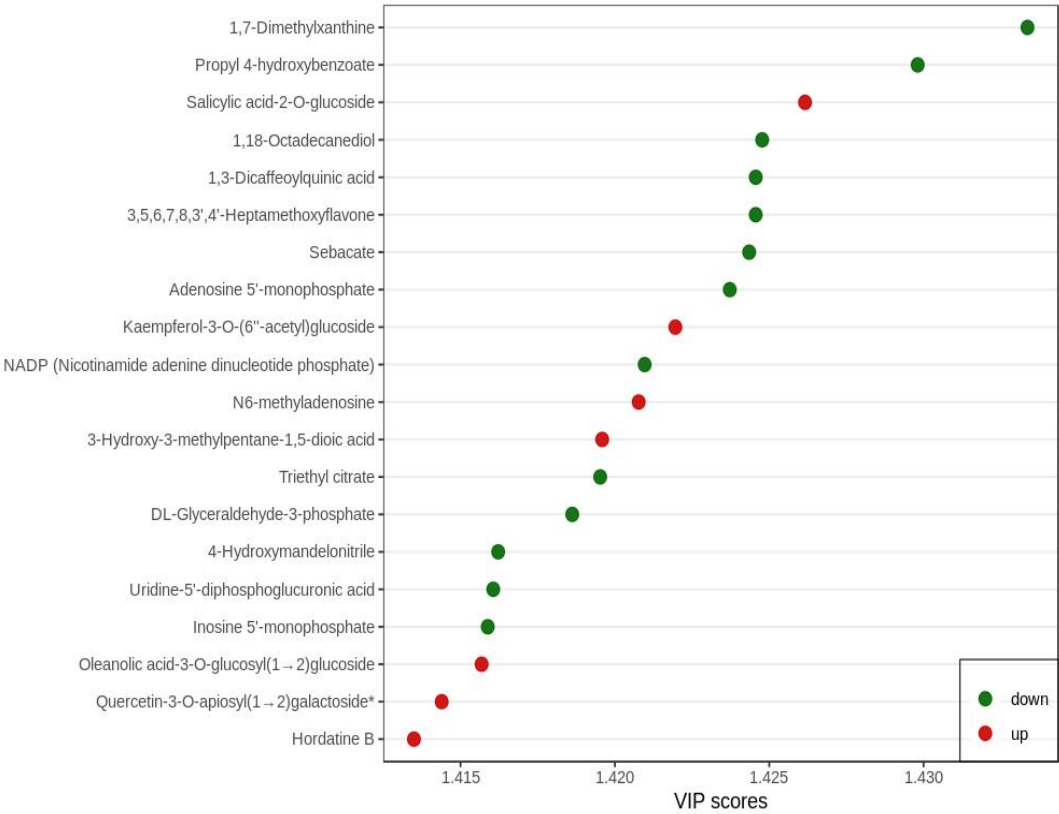

R2\_vs\_R5 VIP score Plot

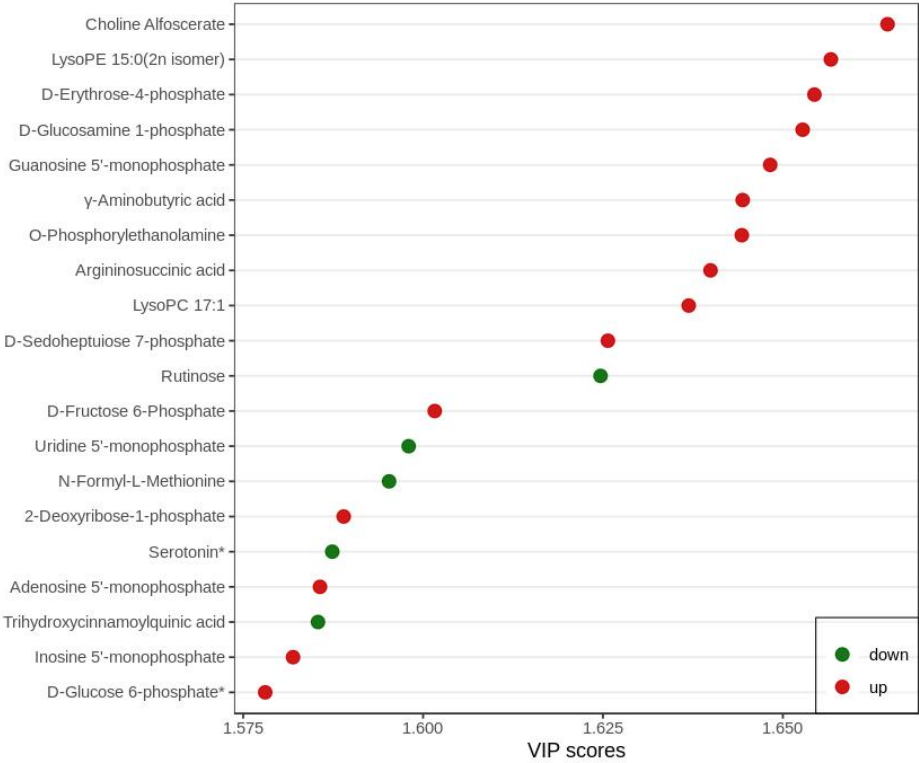

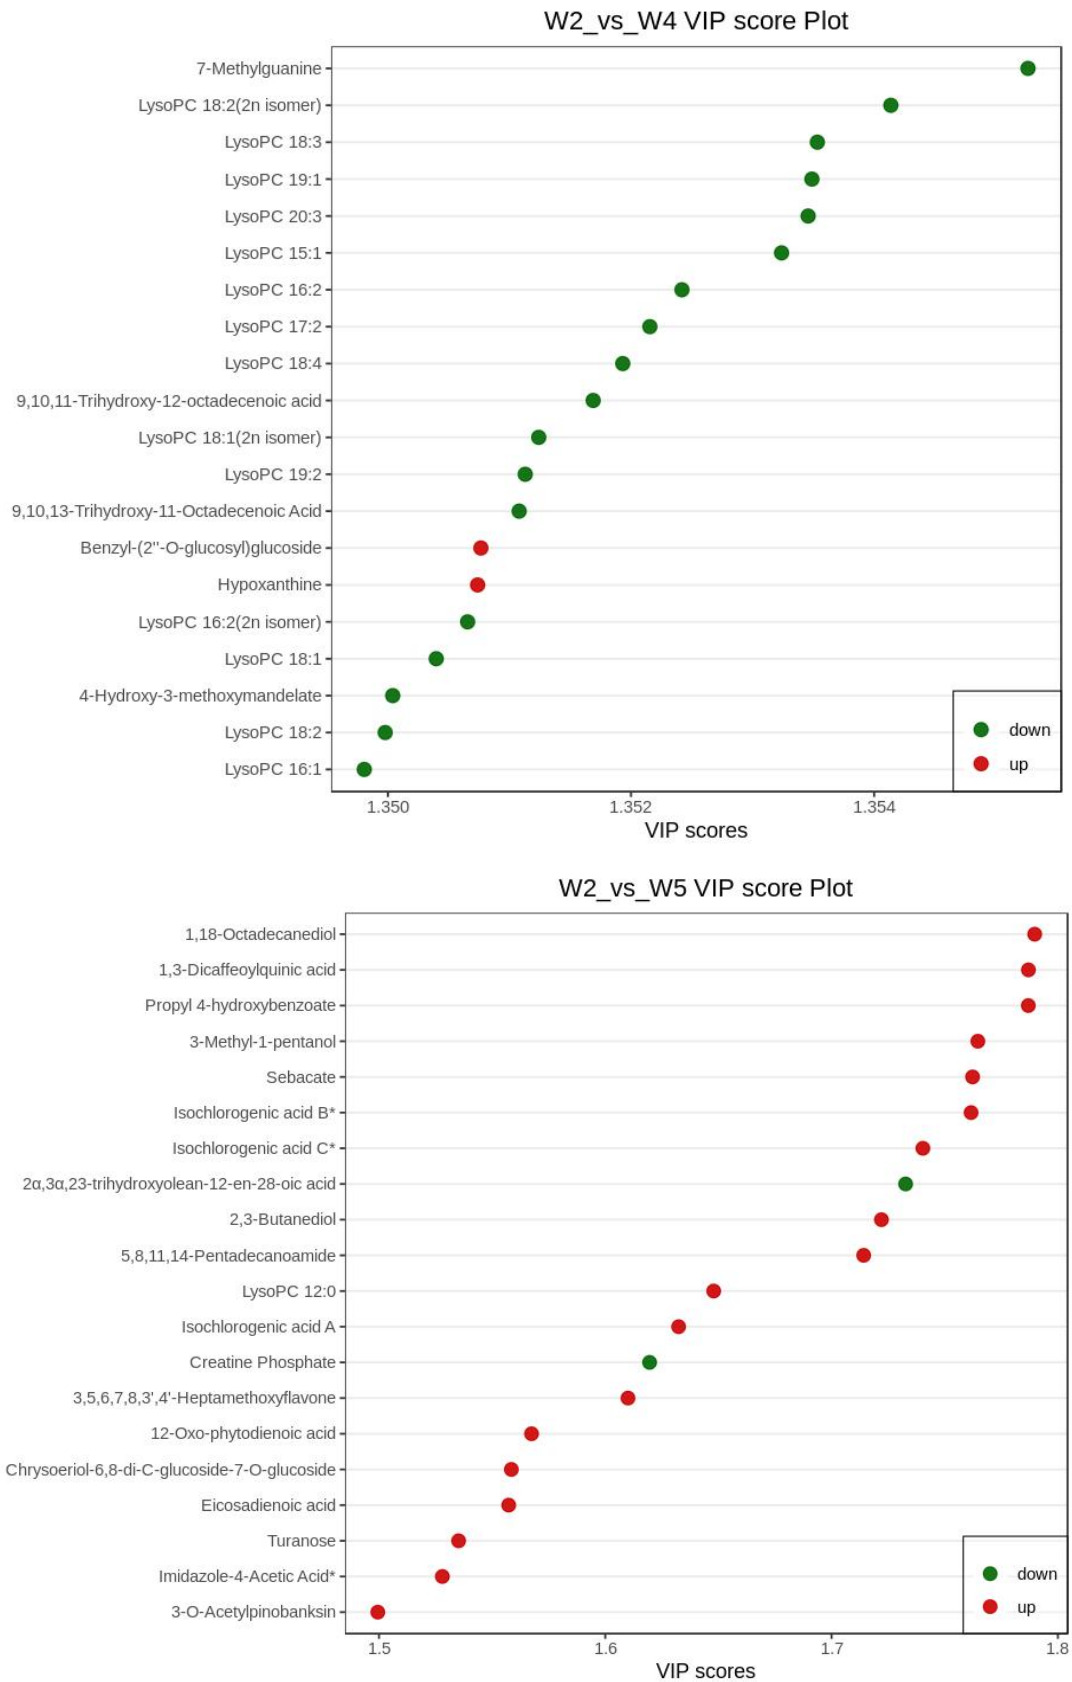

Figure S5. Variable importance projection (VIP) value map of differentially expressed metabolites (DEMs). Note: the abscissa represents the VIP value. The ordinate represents DEMs. Red represents DEM upregulation. Green represents DEM downregulation.
