# Supplementary material for: Transcriptome and Metabolome Analyses Revealed the Response Mechanism of Quinoa Seedlings to Different Phosphorus Stresses
Source: MDPI journal article supplement (doi:10.3390/ijms23094704), 2022-04-24
Supplement: s1 [file s1]

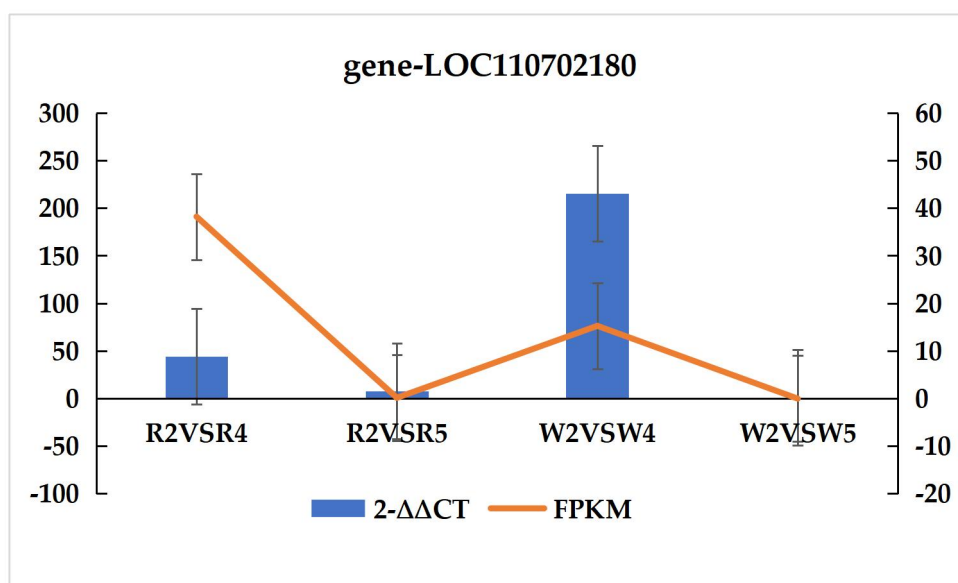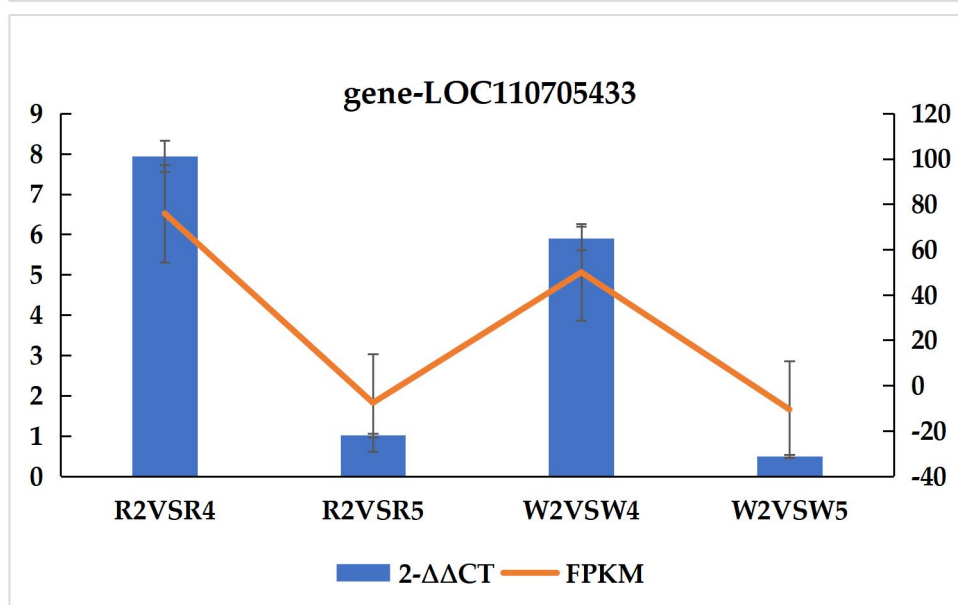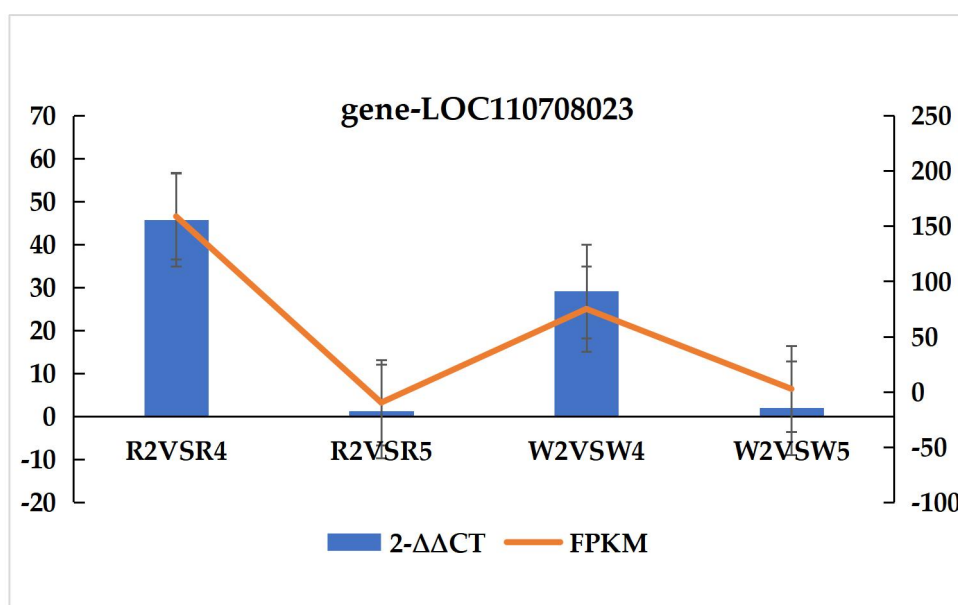

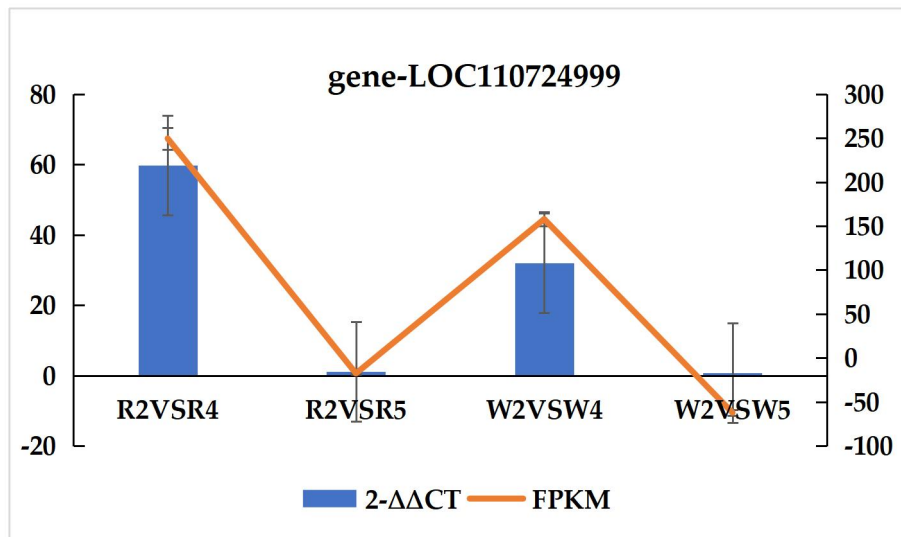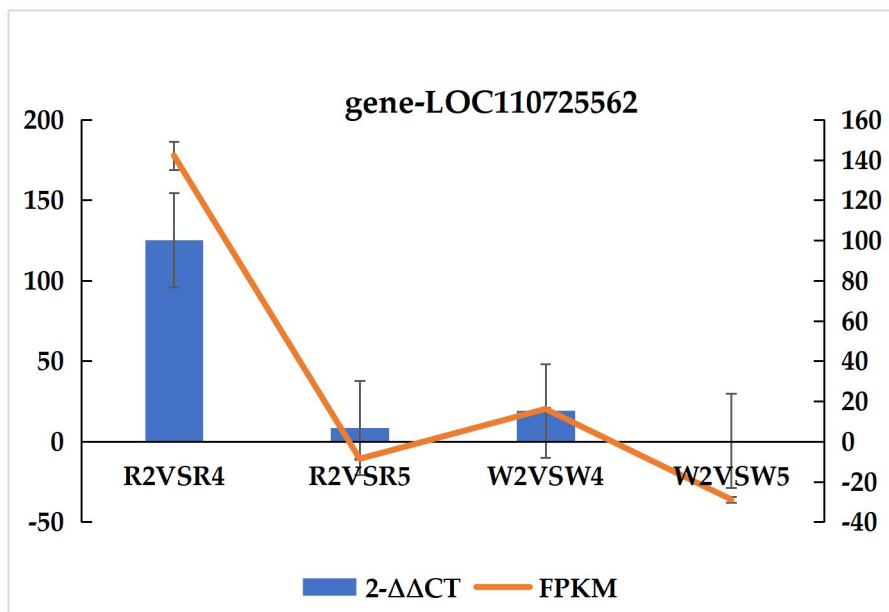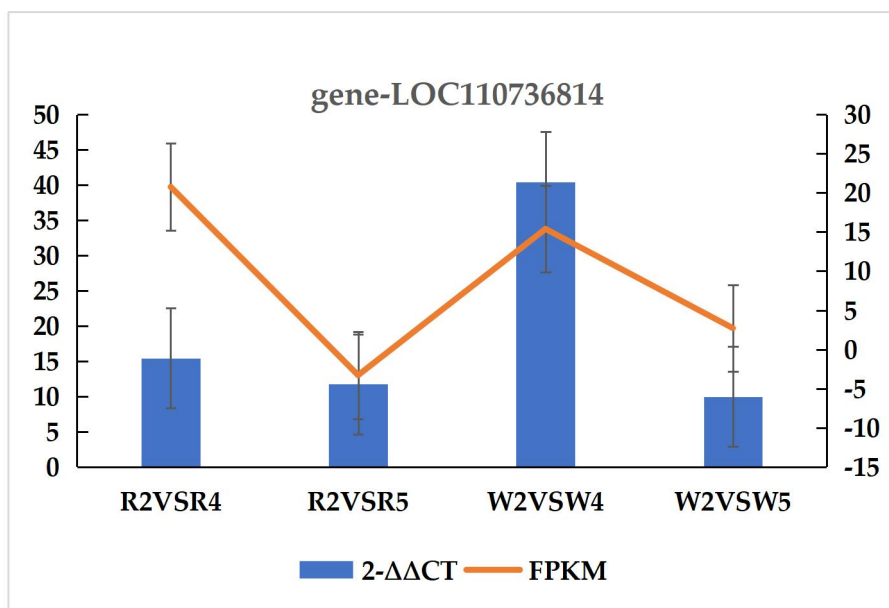

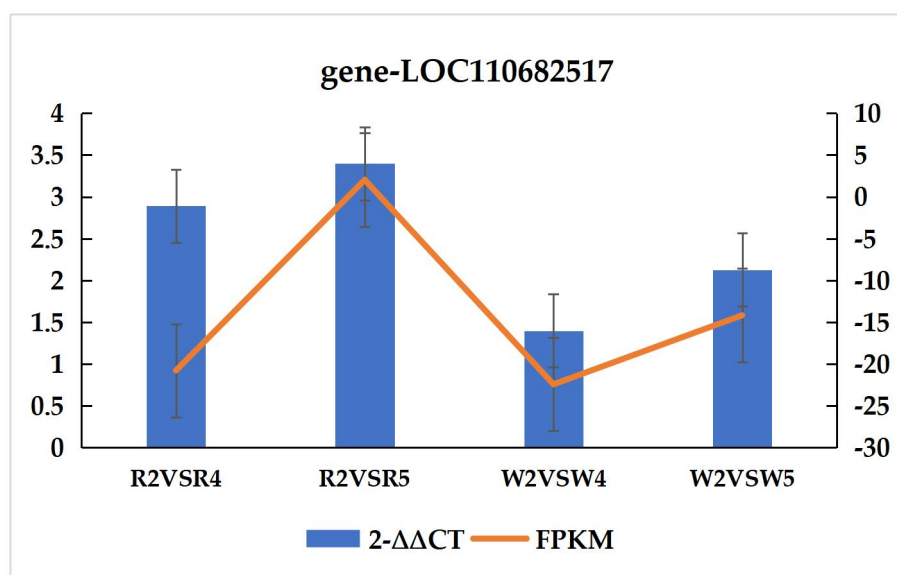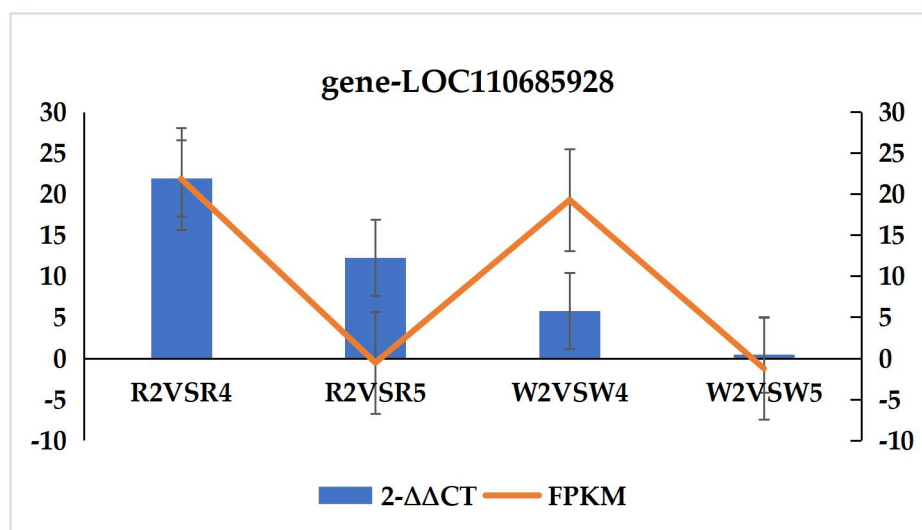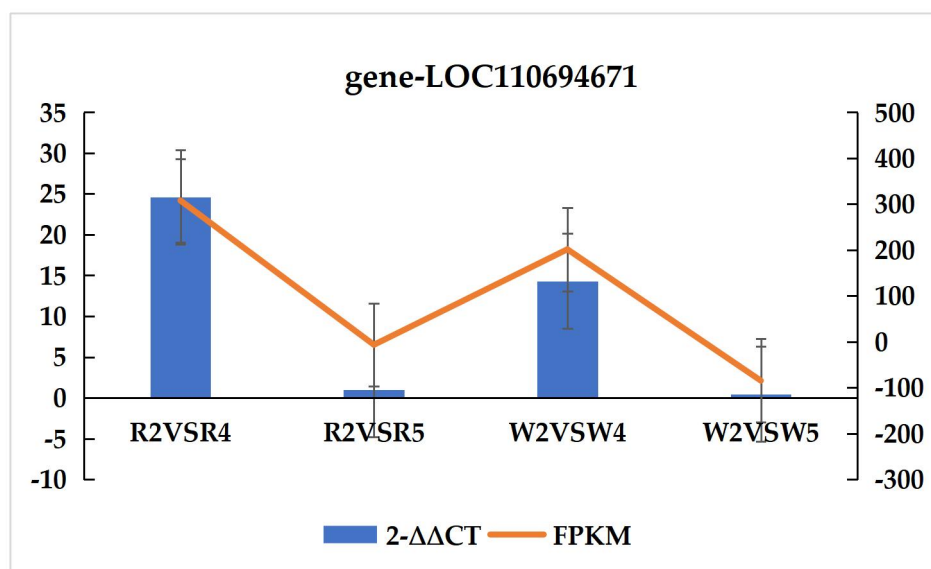

Figure S10. Comparison of RT-qPCR and RNA-Seq results. Histogram: RT-qPCR results. Broken-line diagram: RNA-Seq data. The ordinate represents the expression level. The abscissa represents different groups.
