# Supplementary material for: Transcriptome and Metabolome Analyses Revealed the Response Mechanism of Quinoa Seedlings to Different Phosphorus Stresses
Source: Int J Mol Sci. 2022 Apr 24;23(9):4704. doi: 10.3390/ijms23094704 (PMC9105174; doi:10.3390/ijms23094704)
Supplement: Supplementary file 1 [file ijms-23-04704-s001.zip]

Archive with 18 entries (18 files):
- Figure.S1.pdf
- Figure.S10.pdf
- Figure.S2.pdf
- Figure.S3.pdf
- Figure.S4.pdf
- Figure.S5.pdf
- Figure.S6.pdf
- Figure.S7.pdf
- Figure.S8.pdf
- Figure.S9.pdf
- Table.S1.xlsx
- Table.S2.xlsx
- Table.S3.xlsx
- Table.S4.xlsx
- Table.S5.xlsx
- Table.S6.xlsx
- Table.S7.xlsx
- Table.S8.xls
