# Supplementary material for: Transcriptome and Metabolome Analyses Revealed the Response Mechanism of Quinoa Seedlings to Different Phosphorus Stresses
Source: Int J Mol Sci. 2022 Apr 24;23(9):4704. doi: 10.3390/ijms23094704 (PMC9105174; doi:10.3390/ijms23094704)
Supplement: Supplementary file 1 [file ijms-23-04704-s001.zip › Table.S1.xlsx]

## Sheet: Sheet1
Table S1. Number and classification of the detected metabolites are shown for CK vs. LP.
Index	Formula	Compounds	Class I	Class II	CAS	Level	W2_vs_W4	R2_vs_R4	W2-1	W2-2	W2-3	W4-1	W4-2	W4-3	R2-1	R2-2	R2-3	R4-1	R4-2	R4-3	cpd_ID	kegg_map
pmb0782	C5H11N	Piperidine	Alkaloids	Piperidine alkaloids	110-89-4	3	up	FALSE	2893500	2834000	2947700	7505000	8125400	4035200	5473000	3787800	5605200	7536100	6752900	6415600	C01746	ko00960
pmf0096	C2H2O4	Oxalic acid	Organic acids	Organic acids	144-62-7	3	FALSE	down	17176	29063	11390	37092	21276	22585	36439	45992	53364	17376	21774	22542	C00209	ko00230,ko00630,ko01100
Lmlp001319	C4H10O2	2,3-Butanediol	Others	Saccharides and Alcohols	513-85-9	3	FALSE	down	9991.5	16120	24243	13203	8405.8	9805.1	226720	139320	148320	8046.4	7984.2	18286	C03044	ko00650
ML10172161	C3H4O4	Hydroxypyruvic acid*	Organic acids	Organic acids	1113-60-6	3	FALSE	up	18509	22000	19976	40424	22729	43994	17853	14174	33967	69042	67982	41796	C00168	ko00260,ko00630,ko01100,ko01110,ko01200
Lmbn000193	C3H4O4	Tartronate semialdehyde*	Organic acids	Organic acids	2480-77-5	3	up	up	21826	25484	10767	26522	37508	64358	24351	7023.2	32419	70718	86240	70350	C01146	ko00053,ko00630,ko01100
mws0576	C4H8O3	3-Hydroxybutyric acid	Organic acids	Organic acids	300-85-6	2	down	down	96684	98768	161200	43427	14815	21478	38909	104930	70759	48890	6965.9	13838	C01089	ko00072,ko00650,ko01100
pme1975	C3H4O4	Malonic acid	Organic acids	Organic acids	141-82-2	3	FALSE	up	110170	126860	117760	239480	161070	264530	135560	152250	160630	504160	386660	368540	C00383	ko00061,ko00240,ko00410,ko01100,ko01212
MWS1776	C7H8O	m-Cresol	Phenolic acids	Phenolic acids	108-39-4	3	down	down	16992	19709	19043	1266.5	1411.1	6312.2	20300	13241	15527	897.51	3824.1	1807.5	C01467	--
mws1358	C6H6O2	Pyrocatechol	Phenolic acids	Phenolic acids	120-80-9	2	FALSE	up	6599.5	25318	11324	22114	36036	29210	10857	4257.1	5170.6	13589	35397	32947	C00090	ko01100
MWS5173	C4H5N3O	Isocytosine	Nucleotides and derivatives	Nucleotides and derivatives	108-53-2	3	FALSE	up	2681.2	7618.8	12721	15368	14223	9488.3	7373.5	9901.5	11993	27313	27670	126230	--	--
mws0376	C4H4O4	Fumaric acid	Organic acids	Organic acids	110-17-8	3	up	FALSE	555790	709190	702100	1338200	1749500	937680	810830	427100	861040	1429300	627950	899530	C00122	ko00020,ko00190,ko00220,ko00250,ko00350,ko00360,ko00620,ko00650,ko00760,ko01100,ko01110,ko01200
pmb1096	C8H7N	Indole	Alkaloids	Plumerane	120-72-9	1	up	up	9612.1	8117.5	6563	22270	20612	11265	12784	8455.6	21698	38979	22211	25090	C00463	ko00380,ko00400,ko00402,ko01100,ko01110
MWSmce207	C6H6N2O	Acetylpyrazine	Others	Others	22047-25-2	3	up	FALSE	23372	23597	11656	37861	36107	44050	27449	29909	22703	45049	35476	32662	--	--
MWSmce709	C9H7N	Isoquinoline	Alkaloids	Isoquinoline alkaloids	119-65-3	2	down	down	104050	121780	122110	27420	29120	48361	104200	90135	58697	26413	36235	36487	C06323	--
mws0216	C5H9NO3	Trans-4-Hydroxy-L-proline	Amino acids and derivatives	Amino acids and derivatives	51-35-4	2	up	FALSE	18290000	17969000	20419000	50003000	54701000	23934000	33107000	22679000	30268000	44583000	30019000	33464000	C01157	ko00330,ko01100,ko02010
pmp001198	C6H13NO2	6-Deoxyfagomine	Alkaloids	Piperidine alkaloids	197449-09-5	1	up	FALSE	3130600	3056300	3335300	7741300	9063000	4421000	5626800	4140000	6129300	8124300	7388300	6928500	--	--
mws0227	C6H13NO2	L-Leucine*	Amino acids and derivatives	Amino acids and derivatives	61-90-5	1	up	FALSE	554140	599440	608570	1480500	1670900	885360	993470	740460	1081300	1413900	1344500	1406800	C00123	ko00280,ko00290,ko00966,ko00970,ko01100,ko01110,ko01210,ko01230,ko02010
pme0274	C6H13NO2	6-Aminocaproic acid	Organic acids	Organic acids	60-32-2	2	up	FALSE	387010	417240	424280	1118400	1248800	574100	751830	541160	782440	1165200	855000	855060	C02378	ko01100
mws1167	C4H4O5	Oxaloacetic acid	Organic acids	Organic acids	328-42-7	3	up	FALSE	48980	30992	58792	121170	137870	122390	219020	229080	260490	93575	239430	169710	C00036	ko00010,ko00020,ko00250,ko00620,ko00630,ko00710,ko01100,ko01110,ko01200,ko01210,ko01230
Lmgn000160	C4H8N2O3	3-Ureidopropionic Acid	Organic acids	Organic acids	462-88-4	1	up	FALSE	7506	6813.8	10241	47929	79869	23615	12018	10786	13215	28034	14841	21140	C02642	ko00240,ko00410,ko00770,ko01100
mws0972	C6H12O3	6-Hydroxyhexanoic acid	Organic acids	Organic acids	1191-25-9	1	down	down	2349000	2265800	2096900	487270	744430	1404300	1653600	1952800	2902000	281650	633980	325730	C06103	--
Lmrn002746	C6H12O3	2-Hydroxy-4-methylpentanoic acid	Organic acids	Organic acids	498-36-2	1	up	FALSE	13364	23025	14028	62535	62669	38547	154120	143990	154340	215780	243160	251160	--	--
Lmbn000198	C4H6O5	3-Dehydro-L-Threonic Acid*	Organic acids	Organic acids	-	1	FALSE	up	6670200	7291800	6982400	8679100	9624300	12762000	7720600	7846100	6059200	17961000	16650000	16614000	C03064	ko00053,ko01100
mws0275	C4H6O5	L-Malic acid*	Organic acids	Organic acids	97-67-6	1	FALSE	up	1990900	1980200	1682200	2067800	2492200	3652700	1583100	2020400	1734500	5462700	4359100	4845300	C00149	ko00020,ko00620,ko00630,ko00710,ko01100,ko01110,ko01200
pmb0374	C5H5N5	2-Aminopurine	Nucleotides and derivatives	Nucleotides and derivatives	452-06-2	1	FALSE	down	2500200	2757900	2722700	2786100	2761300	2705000	1919000	2526800	2366200	1020400	882290	1263700	--	--
pme0033	C5H4N4O	Hypoxanthine	Nucleotides and derivatives	Nucleotides and derivatives	68-94-0	3	up	FALSE	68146	69432	71722	162650	148040	152700	222640	223460	324580	548650	598850	385000	C00262	ko00230,ko01100
MWSmce466	C8H8O2	4'-Hydroxyacetophenone	Phenolic acids	Phenolic acids	99-93-4	3	up	FALSE	24009	45391	33690	128820	120740	90476	33781	38264	40660	37382	24804	18138	C10700	ko01100
mws1078	C7H7NO2	Anthranilic Acid	Phenolic acids	Phenolic acids	118-92-3	3	down	down	1424600	1515100	1753200	637450	667920	724480	898950	1013500	897620	507840	439000	364950	C00108	ko00380,ko00400,ko00998,ko01058,ko01100,ko01110,ko01230
mws0146	C7H7NO2	Nicotinic Acid Methyl Ester(Methyl Nicotinate)	Alkaloids	Pyridine alkaloids	93-60-7	3	up	FALSE	94690	127300	74946	234350	241240	208230	109470	103400	161910	165500	209360	182450	--	--
MWSCX016	C7H6O3	p-hydroxybenzoic acid	Phenolic acids	Phenolic acids	99-96-7	3	FALSE	up	137360	199080	204030	202020	304760	238870	111250	113140	124380	286850	290920	133040	C00156	ko00130,ko00790,ko01100,ko01110
Lmbn001981	C7H6O3	2,5-Dihydroxybenzaldehyde*	Phenolic acids	Phenolic acids	1194-98-5	2	FALSE	up	1086100	2088800	1706400	1850000	2892700	2128500	1166200	1276600	1274300	3091800	3076000	1388700	C05585	ko00350,ko01100
MWS1850	C8H10O2	2-Phenoxyethanol	Phenolic acids	Phenolic acids	122-99-6	3	down	FALSE	41213	30440	34115	10965	13896	8495	39913	38265	41352	47770	49327	41854	--	--
mws0704	C2H8NO4P	O-Phosphorylethanolamine	Alkaloids	Alkaloids	1071-23-4	3	down	down	32163	25812	30910	306.81	585.95	1005.4	46965	41760	28216	1162	2916.4	5532.2	C00346	ko00564,ko00600,ko01100
mws1012	C9H6O2	Coumarin	Lignans and Coumarins	Coumarins	91-64-5	2	down	FALSE	24048	17748	19788	7134.6	7914.1	11160	19992	16633	13997	13497	11836	17119	C05851	ko00940,ko01110
Wmzn000227	C6H10O4	2,2-Dimethylsuccinic acid	Organic acids	Organic acids	597-43-3	1	up	FALSE	12855	27134	24647	152840	202360	46077	62480	51450	96003	57756	35098	45836	--	--
Lmbn001676	C6H10O4	3-Hydroxy-3-Methyl-2-Oxopentanoic Acid	Organic acids	Organic acids	-	3	down	down	17036	22068	23124	4545.8	6238.6	17076	19959	21793	26147	9983.4	18384	4138.5	C14463	ko00290,ko01110,ko01210
MWSmce572	C9H9NO	Cinnamamide	Others	Others	22031-64-7	3	FALSE	down	16208	73251	54903	18005	33625	30053	56268	9946.6	66851	8134.3	7208.6	3301.2	--	--
Lmgp000796	C8H7NO2	4-Hydroxymandelonitrile	Alkaloids	Phenolamine	13093-65-7	1	FALSE	down	2288800	2287000	2258000	1226500	1250200	1390300	1789500	2132600	2103500	955210	876140	1003200	C00650	--
pme1210	C5H11NO2S	L-Methionine	Amino acids and derivatives	Amino acids and derivatives	63-68-3	1	FALSE	down	2368400	2411400	2274300	1299700	1198500	1503600	1647000	2193600	2138400	939970	861460	957670	C00073	ko00270,ko00966,ko00970,ko01100,ko01110,ko01210,ko01230
mws0847	C6H7N5	1-Methyladenine	Nucleotides and derivatives	Nucleotides and derivatives	5142-22-3	2	FALSE	down	65954	105590	80836	38987	42437	46645	66122	65000	72742	26179	30946	21817	C02216	--
Lmxp001668	C9H10O2	2-Methoxy-4-ethenylphenol	Phenolic acids	Phenolic acids	7786-61-0	1	up	up	24135	6039.1	19325	320420	387570	445890	711310	578480	993090	2090100	2162400	1894000	C17883	--
pme0183	C5H5N5O	Isoguanine	Nucleotides and derivatives	Nucleotides and derivatives	3373-53-3	1	up	FALSE	196390	327950	267480	687790	648760	537080	206880	206040	345950	471790	382600	280260	--	--
pme1109	C5H5N5O	Guanine	Nucleotides and derivatives	Nucleotides and derivatives	73-40-5	1	up	up	1118200	1966000	2050700	5795600	4838500	4345300	1440000	950940	2213000	4118300	3199700	2063400	C00242	ko00230,ko01100
mws4177	C8H9NO2	Methyl Anthranilate	Phenolic acids	Phenolic acids	134-20-3	3	FALSE	down	7770.6	7052.1	8054.5	4444.9	4187	6446	10150	8215.7	10884	4955.2	3473.2	3298.9	C20634	--
MWS2984	C4H4N6O	8-Azaguanine	Nucleotides and derivatives	Nucleotides and derivatives	134-58-7	3	up	FALSE	131480	269560	255610	527380	507920	405320	178370	138180	241870	383110	309120	185710	--	--
MWS2058	C8H8O3	3-Methylsalicylic Acid	Phenolic acids	Phenolic acids	83-40-9	3	FALSE	down	4363.1	7693.8	6828.8	3879.6	5377	4897.4	5429.8	6025.2	4193.7	2232.6	3159.1	2049.2	C14088	--
MWS1962	C10H16O	cis-Citral	Organic acids	Organic acids	5392-40-5	3	down	FALSE	10136	11232	14244	5642.2	5794.1	5937.1	9621.5	14031	10044	8565.4	10292	9220.2	C09847	ko01110
Hmlp000935	C8H11NO2	Vanillylamine	Alkaloids	Phenolamine	1196-92-5	2	up	up	226600	177390	217380	1614600	1884400	1347400	660670	523460	812350	2460300	3517500	1240600	C16666	ko00998,ko01100,ko01110
mws4002	C8H11NO2	Dopamine	Alkaloids	Phenolamine	51-61-6	1	up	up	1398900	1186200	1495000	9573200	10021000	7628100	3934400	2776000	2706300	12222000	22509000	8799900	C03758	ko00350,ko00950,ko00965,ko01100,ko01110
mws0885	C7H6O4	2,4-Dihydroxybenzoic acid	Phenolic acids	Phenolic acids	89-86-1	1	FALSE	up	1003400	696160	838700	1484500	838400	1175600	242740	107570	218990	789870	549270	346060	--	--
MWSmce264	C8H10O3	Hydroxytyrosol	Phenolic acids	Phenolic acids	10597-60-1	3	FALSE	up	6486	10197	11562	11991	17350	8991.4	11046	5697	8674.8	19845	19265	15752	--	--
mws0254	C6H9N3O2	L-Histidine	Amino acids and derivatives	Amino acids and derivatives	71-00-1	1	FALSE	down	1329400	1326300	1484100	1302600	1231300	680020	3800500	4535900	5314200	2655500	1675700	2308400	C00135	ko00340,ko00410,ko00970,ko01100,ko01110,ko01230,ko02010
pme2165	C5H4N2O4	Orotic acid	Others	Vitamin	65-86-1	3	down	FALSE	672750	580980	731870	300550	189960	209360	237420	337940	414910	174030	205100	407450	C00295	ko00240,ko01100
pmb0819	C10H8N2	3-Indoleacetonitrile	Alkaloids	Plumerane	771-51-7	3	up	FALSE	66778	51507	82544	159860	208620	101980	119280	68619	121610	237870	148000	162600	C02938	ko00380,ko01100
mws0005	C10H12N2	Tryptamine	Alkaloids	Plumerane	61-54-1	1	up	FALSE	16915000	24167000	20288000	92415000	102420000	69855000	32220000	38358000	61285000	79606000	64697000	29965000	C00398	ko00380,ko00901,ko01100,ko01110
pme2914	C6H10O5	3-Hydroxy-3-methylpentane-1,5-dioic acid	Amino acids and derivatives	Amino acids and derivatives	503-49-1	1	FALSE	up	115610	108460	122800	228600	225500	174140	218670	222300	211770	617570	499900	511070	C03761	--
pme1419	C6H13NO2S	L-Methionine methyl ester	Amino acids and derivatives	Amino acids and derivatives	10332-17-9	3	FALSE	down	116300	114540	117130	62918	59703	60196	112770	98459	141320	31071	39837	36197	--	--
Lmbp000123	C6H13NO2S	L-Homomethionine	Amino acids and derivatives	Amino acids and derivatives	25148-30-5	3	FALSE	down	739300	979680	1195400	721680	707910	283020	1148100	870190	682000	344460	181490	360680	C17213	ko00966,ko01110,ko01210
mws1641	C6H4N4O2	Lumazine	Nucleotides and derivatives	Nucleotides and derivatives	487-21-8	3	FALSE	down	24837	52785	41284	19316	38052	36475	49420	34057	74613	19460	25482	23049	C03212	--
Lmbn002739	C9H8O3	3-Hydroxycinnamic Acid	Phenolic acids	Phenolic acids	14755-02-3	3	down	down	338400	348060	396340	116040	132110	128350	628610	454930	741400	165460	267040	254860	C12621	ko00360,ko01100
pme3968	C6H7N5O	7-Methylguanine	Nucleotides and derivatives	Nucleotides and derivatives	578-76-7	3	down	FALSE	42396	43754	59519	9	9	9	9	9	9	9	9	9	C02242	--
MWS4525	C6H7N5O	6-O-methylguanine	Nucleotides and derivatives	Nucleotides and derivatives	20535-83-5	1	FALSE	down	57476	80442	97412	87219	27656	22695	18619	4727.7	33348	9	6332.4	9	--	--
pmb0037	C10H15NO	Hordenine	Alkaloids	Phenolamine	539-15-1	3	up	FALSE	539180	698790	630380	3032200	2935800	1661700	697800	1024400	1387700	2056500	2403900	973520	C06199	ko00350,ko01100
Lmrn003000	C9H10O3	2-Hydroxy-3-phenylpropanoic acid	Phenolic acids	Phenolic acids	7326-19-4	1	up	FALSE	2380.2	5306.2	3522.2	28282	23242	30546	128830	93158	90552	117030	101940	110960	C05607	ko00360,ko00960,ko01100
Lmbn005172	C9H10O3	2,6-Dimethoxybenzaldehyde	Phenolic acids	Phenolic acids	3392-97-0	1	up	FALSE	8771.8	8760.5	13333	69522	58776	52508	162980	176210	162580	166390	183480	188780	--	--
mws2125	C3H5O6P	Phosphoenolpyruvate	Organic acids	Organic acids	138-08-9	3	down	down	188070	71850	63352	7845.2	3122	4446.5	527000	459690	186010	5613.5	1113.5	9184.5	C00074	ko00010,ko00020,ko00400,ko00440,ko00620,ko00710,ko00998,ko01100,ko01110,ko01200,ko01230
pme1292	C8H8O4	Homogentisic acid	Phenolic acids	Phenolic acids	451-13-8	3	down	FALSE	208940	207400	185240	83578	56577	40020	294900	115460	61423	44329	155030	138970	C00544	ko00130,ko00350,ko01100
MWSmce490	C8H8O4	2',4',6'-Trihydroxyacetophenone	Phenolic acids	Phenolic acids	480-66-0	3	FALSE	up	15174	26264	16286	18923	34624	31267	11791	8608.5	9856.5	27345	20820	22107	C21895	--
Zmzn000078	C3H7O6P	Dihydroxyacetone phosphate	Others	Saccharides and Alcohols	57-04-5	3	down	down	100690	79927	84159	7338.5	6539.4	10683	162770	151220	80490	5859.7	13585	11273	C00111	ko00010,ko00040,ko00051,ko00052,ko00561,ko00562,ko00564,ko00640,ko00710,ko00760,ko01100,ko01110,ko01200,ko01230
pme3186	C3H7O6P	DL-Glyceraldehyde-3-phosphate	Organic acids	Organic acids	591-59-3	3	down	down	146770	128480	151620	20761	7494	18149	207280	210620	143900	18383	23751	27952	C00661	--
Hmln008318	C10H18O2	8-Methyl-6-nonenoic acid	Organic acids	Organic acids	59320-77-3	3	down	FALSE	5709.2	5422.4	5667.7	2894.7	1942.7	1789.9	5157.2	5291.8	5596.9	2819.4	3778.4	4551.1	C18202	ko00998,ko01100,ko01110
mws0242	C8H14O4	Suberic Acid	Organic acids	Organic acids	505-48-6	2	FALSE	down	61782	54564	60388	74492	107210	69084	104540	73964	102110	37167	38116	30194	C08278	--
Lmgn002555	C8H14O4	2-Propylglutaric acid	Organic acids	Organic acids	32806-62-5	2	up	FALSE	827420	970970	1032400	2546700	2680300	2899400	17476000	13264000	11913000	16185000	14980000	17339000	C16658	--
Zmyn000155	C7H14N2O3	N-α-Acetyl-L-ornithine	Amino acids and derivatives	Amino acids and derivatives	6205-08-9	1	up	up	69748	60382	58846	530330	553930	110700	253290	131500	174420	915010	810730	4928000	C00437	ko00220,ko01100,ko01110,ko01210,ko01230
mws0260	C6H14N4O2	L-Arginine	Amino acids and derivatives	Amino acids and derivatives	74-79-3	1	up	up	568320	520340	835980	2836300	3633400	1053700	1572300	1088400	1206600	1730600	5294100	10744000	C00062	ko00220,ko00261,ko00330,ko00472,ko00970,ko01100,ko01110,ko01230,ko02010
Zmgn001448	C7H12O5	2-Propylmalic Acid*	Organic acids	Organic acids	-	2	down	FALSE	1850700	1539100	2161300	704740	557490	992470	2160900	2745100	2719500	1547700	2106800	2702200	C05994	ko00620
Lmbn001754	C7H12O5	3-Isopropylmalic Acid*	Organic acids	Organic acids	921-28-8	2	down	FALSE	1803900	1826400	2107300	682440	580480	1034600	2199500	2836400	2637700	1593600	2078900	3079900	C04411	ko00290,ko01100,ko01110,ko01210,ko01230
pmb3101	C7H12O5	2-Isopropylmalic Acid	Organic acids	Organic acids	49601-06-1	1	down	FALSE	1776400	1781100	1912800	587820	665390	999470	1957700	2594000	2534200	1452200	1899400	2784800	C02504	ko00290,ko00620,ko01100,ko01110,ko01210,ko01230
pme2024	C10H12N2O	Serotonin*	Alkaloids	Plumerane	50-67-9	1	up	up	2109300	3062200	2604400	11430000	15006000	8575900	3176700	2302300	3585200	10573000	11691000	4579000	C00780	ko00380,ko01100
pmb0774	C10H12N2O	N-Hydroxytryptamine*	Alkaloids	Plumerane	-	1	up	up	1958000	2852500	2371300	10255000	13957000	8092100	3029800	2116700	3026500	9993600	10588000	4184100	C17203	ko00380,ko01100
pmb0468	C6H11NO3S	N-Formyl-L-Methionine	Amino acids and derivatives	Amino acids and derivatives	4289-98-9	3	up	up	43107	59776	52632	215260	301220	169420	76178	50565	80768	205110	232890	96418	C03145	ko00270
mws0009	C10H10O3	Coniferaldehyde	Phenolic acids	Phenolic acids	20649-42-7	2	down	down	47440	44793	32482	12521	22884	18001	66611	66880	75373	8033.6	13892	8419.6	C02666	ko00940,ko01100,ko01110
mws0981	C6H5N5O2	Isoxanthopterin	Nucleotides and derivatives	Nucleotides and derivatives	529-69-1	1	up	FALSE	2129.7	2829.7	3845	19343	8854.3	19868	17578	16708	16478	22427	31464	23321	C03975	--
pmf0139	C6H12O6	D-Galactose*	Others	Saccharides and Alcohols	59-23-4	1	up	FALSE	551840	648820	594850	1439300	1245600	1295100	837890	974910	763810	1312500	1876400	1431200	C00124	ko00052,ko01100
mws0663	C7H8N4O2	1,7-Dimethylxanthine	Nucleotides and derivatives	Nucleotides and derivatives	611-59-6	3	up	down	453.9	5428.8	1347.8	7708.2	6511.3	9001.5	16226	12032	15226	675.39	454.49	449.32	C13747	ko00232,ko01100,ko01110
MWS2070	C10H12O3	Propyl 4-hydroxybenzoate	Phenolic acids	Phenolic acids	94-13-3	3	up	down	6418.9	9533.5	10512	55338	57592	45760	185970	152560	117320	5223.3	7061.2	7347	--	--
mws0093	C10H12O3	Coniferyl alcohol	Phenolic acids	Phenolic acids	458-35-5	2	FALSE	down	15753	30168	26897	15755	13508	31932	26388	16067	35701	11228	9425.8	8091.2	C00590	ko00940,ko00998,ko01100,ko01110
pmb1754	C5H15NO4P+	O-Phosphocholine	Alkaloids	Alkaloids	107-73-3	3	down	down	909390	931490	1226700	146740	83880	105690	1280000	900030	698700	174680	186730	328180	C00588	ko00564,ko01100
Zmgn000447	C3H7O7P	3-Phospho-D-glyceric acid	Others	Saccharides and Alcohols	820-11-1	3	down	down	512410	232530	200130	22306	15878	19810	1705900	1397300	684650	14363	23889	49190	C00197	ko00010,ko00030,ko00260,ko00270,ko00561,ko00630,ko00710,ko01100,ko01110,ko01200,ko01230
Hmgp002327	C11H9O2N	3-amino-2-naphthoic acid	Alkaloids	Alkaloids	-	1	up	FALSE	6574400	6622300	7626400	20523000	22793000	12572000	12424000	7400100	16926000	26834000	17375000	17054000	--	--
Hmmp001310	C11H9NO2	3-Indoleacrylic acid	Alkaloids	Plumerane	1204-06-4	3	up	FALSE	6656900	5782000	7429500	21211000	21977000	11792000	11012000	7073200	17332000	25923000	16048000	17416000	C21283	--
pme0137	C7H12N2O4	N-Acetyl-L-Glutamine	Amino acids and derivatives	Amino acids and derivatives	2490-97-3	2	FALSE	up	9514.4	20656	4154.2	18719	19206	12208	6712.1	3858.8	8874.1	27704	20453	15203	--	--
pme0122	C8H16N2O3	N6-Acetyl-L-lysine	Amino acids and derivatives	Amino acids and derivatives	692-04-6	1	up	FALSE	23149	15136	18499	29916	48895	42786	46509	44282	73661	78927	73400	20871	C02727	ko00310,ko01100
Zmjp000182	C7H16N4O2	N-Monomethyl-L-arginine	Amino acids and derivatives	Amino acids and derivatives	17035-90-4	2	up	FALSE	283020	324390	367760	871620	1036600	443090	582110	576710	942680	1058800	1019800	1846600	C03884	--
MWSslk080	C10H20O3	10-Hydroxydecanoic acid	Lipids	Free fatty acids	1679-53-4	3	down	down	27183	38861	43832	5625.7	3220.1	4341.1	28896	13037	12620	931.33	372.41	1299.7	C02774	--
pme0075	C7H11NO5	N-Acetyl-L-glutamic acid	Amino acids and derivatives	Amino acids and derivatives	1188-37-0	1	down	FALSE	1511500	1459100	1181500	655580	603230	643870	1151700	943940	839110	640060	573480	611000	C00624	ko00220,ko01100,ko01110,ko01210,ko01230
pme2244	C11H11NO2	3-Indolepropionic acid	Alkaloids	Plumerane	830-96-6	1	down	down	211370	203370	209500	68539	54804	61927	131740	143560	107420	45751	44801	53907	--	--
pme0278	C7H14N2O4	2,6-Diaminooimelic acid	Organic acids	Organic acids	583-93-7	3	FALSE	down	135060	101300	190790	170420	135350	69033	230120	347460	327210	236950	98991	112000	C00666	ko00300,ko01100,ko01110,ko01230
pme2993	C10H8O4	Scopoletin (7-Hydroxy-5-methoxycoumarin)	Lignans and Coumarins	Coumarins	92-61-5	3	up	up	18428	46869	63997	98990	139030	176470	79849	108780	219030	390210	319590	172500	C01752	ko00940,ko01110
MWS0686	C9H7NO4	5,6-Dihydroxy-1H-indole-2-carboxylic acid	Alkaloids	Plumerane	4790-08-3	3	up	FALSE	5358.6	496.96	2458.5	18274	17551	29804	5180.6	4981.7	7483.3	16725	16222	5174.7	C04185	ko00350,ko01100
pme2743	C10H11NO3	N-Phenylacetylglycine	Amino acids and derivatives	Amino acids and derivatives	500-98-1	3	up	FALSE	313710	213840	193020	923340	954170	541240	86680	136850	152120	214610	195770	110160	C05598	ko00360
mws1189	C6H10O7	D-Galacturonic acid*	Organic acids	Organic acids	685-73-4	3	FALSE	up	34269	30795	28054	41299	31412	31337	30286	50675	34820	146630	60519	95816	C00333	ko00040,ko00053,ko00520,ko01100,ko02010
pme3705	C6H10O7	D-Glucoronic acid*	Others	Saccharides and Alcohols	6556-12-3	3	FALSE	up	42190	37740	19428	36055	41525	49906	53764	36329	36061	111970	95033	87166	C00191	ko00040,ko00053,ko00520,ko00562,ko01100
MWSmce632	C10H10O4	Vanillin acetate	Phenolic acids	Phenolic acids	881-68-5	2	down	FALSE	609480	578430	696070	137410	147830	170870	521500	465810	493860	294410	220800	284700	--	--
pme0422	C10H10O4	Isoferulic Acid*	Phenolic acids	Phenolic acids	537-73-5	1	down	FALSE	1052100	654430	921690	127150	177750	203550	1133700	1194900	1134000	1335200	925920	932770	C10470	--
mws0014	C10H10O4	Ferulic acid*	Phenolic acids	Phenolic acids	537-98-4	1	down	FALSE	17735000	14241000	15720000	2314800	3595800	4023200	20167000	18640000	20603000	22156000	16501000	17197000	C01494	ko00940,ko01100,ko01110
MWS20182	C10H12O4	Dihydroferulic Acid	Phenolic acids	Phenolic acids	1135-23-5	2	down	FALSE	71758	63090	79834	11294	10280	14047	73695	87769	96328	97474	78482	65927	--	--
MWSslk006	C10H12O4	Ethyl Vanillate	Phenolic acids	Phenolic acids	617-05-0	3	down	down	27858	26681	39784	11336	10776	11451	71491	52697	49683	10044	11182	6777.9	--	--
pme3827	C9H11NO4	3,4-Dihydroxy-L-phenylalanine (L-Dopa)	Amino acids and derivatives	Amino acids and derivatives	59-92-7	1	up	up	31582	23638	10955	221030	288220	133940	41286	39278	93055	620300	521320	300540	C00355	ko00350,ko00950,ko00965,ko01100,ko01110
mws0027	C9H10O5	Syringic acid	Phenolic acids	Phenolic acids	530-57-4	3	up	FALSE	5646.2	6179.8	8600.2	11416	13771	21900	13704	5400.5	4727	14593	11197	14141	C10833	--
pmb2497	C9H10O5	4-Hydroxy-3-methoxymandelate	Phenolic acids	Phenolic acids	55-10-7	3	down	down	286580	294640	313270	130720	139090	141670	211720	240320	193780	57575	117880	95868	C05584	ko00350,ko01100
Zmzn000079	C4H9O7P	D-Erythrose-4-phosphate	Others	Saccharides and Alcohols	585-18-2	3	down	down	95303	76122	92665	20261	23398	18250	75913	77167	55369	14195	17067	25994	C00279	ko00030,ko00400,ko00710,ko00750,ko00998,ko01100,ko01110,ko01200,ko01230
pmb0130	C12H14N2O	Acetryptine	Alkaloids	Plumerane	3551-18-6	3	up	FALSE	13200	20307	18351	348670	66929	38352	17674	19699	66752	40334	26228	13971	--	--
pme0266	C10H18O4	Sebacate	Organic acids	Organic acids	111-20-6	1	up	down	2053	3693.9	1678.6	24604	39607	17087	63491	37803	38165	1909.8	1536.3	2591.7	C08277	--
mws0282	C11H12N2O2	L-Tryptophan	Amino acids and derivatives	Amino acids and derivatives	73-22-3	1	up	FALSE	5599400	5286800	6212200	14465000	16492000	8863400	8731100	5743000	11889000	17386000	11991000	12341000	C00078	ko00260,ko00380,ko00400,ko00901,ko00966,ko00970,ko00998,ko01100,ko01110,ko01210,ko01230
Zmbp002538	C11H12N2O2	1-Methoxy-indole-3-acetamide	Alkaloids	Plumerane	-	1	up	FALSE	16675000	16172000	18156000	49173000	50708000	30095000	29616000	19281000	40719000	55987000	41045000	41363000	--	--
pmb0818	C11H11NO3	Methoxyindoleacetic acid	Alkaloids	Plumerane	3471-31-6	3	up	FALSE	172910	192770	222070	638730	780210	399860	389110	233730	468190	812970	505950	512990	C05660	ko00380
Lmyp003025	C11H11NO3	Coixlactam	Alkaloids	Quinoline alkaloids	-	2	up	up	32698	20454	12961	50808	47504	55204	31307	48208	32292	112510	66370	81911	--	--
Zmgn002106	C11H13NO3	N-Acetyl-L-phenylalanine	Amino acids and derivatives	Amino acids and derivatives	2018-61-3	2	up	up	80204	104860	119790	287680	282230	305350	108550	85282	123080	285460	335880	160670	C03519	ko00360,ko01100
MA10107783	C10H8O5	3-[(1-Carboxyvinyl)oxy]benzoic acid	Phenolic acids	Phenolic acids	16929-37-6	2	up	FALSE	14513	12246	22896	61127	62664	75138	209230	171940	211250	185990	195540	225630	C20772	ko00130,ko01110
mws1014	C10H8O5	Fraxetin (7,8-Dihydroxy-6-methoxycoumarin)	Lignans and Coumarins	Coumarins	574-84-5	3	up	FALSE	49638	42960	34282	101290	88306	188280	96176	155250	177500	152260	88240	192740	C09265	--
Lmbn004790	C11H14O4	Methyl 3-(3-hydroxy-4-methoxyphenyl)propanoate	Phenolic acids	Phenolic acids	129150-61-4	3	up	FALSE	1135.5	3956.8	2319.2	6883.5	6304	7408.2	3946.2	564.5	6759	605	2812.8	2269.5	--	--
pme1675	C4H10N3O5P	Creatine Phosphate	Organic acids	Organic acids	67-07-2	3	down	down	18074	11651	12003	1886.3	3238.6	1563.2	6870.1	14142	8571.9	2059.3	2254.6	4260.4	C02305	ko00330,ko01100
pme0170	C8H16N4O3	N-Acetyl-L-Arginine	Amino acids and derivatives	Amino acids and derivatives	155-84-0	3	FALSE	up	22098	27718	27809	38480	46169	34260	19902	25124	39116	61476	54350	67605	--	--
mws5045	C12H24O3	12-Hydroxydodecanoic acid	Lipids	Free fatty acids	505-95-3	1	FALSE	down	4331.3	3847.1	6975	2086.8	1687	5460.1	13861	6968.8	5649.4	1470	1039	3676.7	C08317	--
Zmln002252	C10H8O6	Sideretin (5,7,8-Trihydroxy-6-methoxycoumarin)	Lignans and Coumarins	Coumarins	-	3	down	FALSE	87288	87671	78346	23207	36874	34274	55783	66132	86102	112190	78855	69928	C22007	--
mws4085	C11H12O5	Sinapic acid	Phenolic acids	Phenolic acids	530-59-6	2	down	FALSE	73700	73825	94892	17004	19438	18760	48035	46768	69562	122910	66689	55208	C00482	ko00940,ko01100,ko01110
pmb2643	C14H26O2	Myristoleic acid	Lipids	Free fatty acids	544-64-9	1	FALSE	down	2308.1	2922.9	4087.3	2242.8	2429.9	2091.2	5163.9	7207.1	3191.8	1857.6	1531.3	3856.7	C08322	--
mws0119	C14H28O2	Myristic Acid	Lipids	Free fatty acids	544-63-8	1	FALSE	down	13090000	9554800	11451000	11086000	11373000	12473000	33631000	28429000	30865000	13777000	13626000	16280000	C06424	ko00061,ko01100
pma6455	C5H11O8P	Ribulose-5-phosphate	Others	Saccharides and Alcohols	4300-28-1	3	down	down	74983	65549	106660	2725.8	2855	12124	77569	92190	48248	1951.8	10158	12812	C00117	ko00030,ko00230,ko00440,ko00710,ko00750,ko01100,ko01110,ko01200,ko01230
Cmsn005615	C14H14O3	3,3',5-Trihydroxybibenzyl	Phenolic acids	Phenolic acids	86630-23-1	2	FALSE	down	5471.5	5146.9	14180	1349.9	3179.1	4493.1	10819	9213.5	5054.4	689.51	997.49	4950	--	--
mws0474	C12H22O4	Dodecanedioic aicd	Lipids	Free fatty acids	693-23-2	1	FALSE	down	7099.4	5071.8	8256.5	5416	6046.9	6297.2	10230	11054	6743.4	5135.6	2587.1	5533.4	C02678	--
pmb0962	C10H22N2O4	L-Lysine-Butanoic Acid	Amino acids and derivatives	Amino acids and derivatives	80407-71-2	3	up	up	1993000	2803100	4049400	8758500	6922400	6032100	2338000	2657900	3598600	7139400	8011900	5136200	--	--
Lmyn000160	C8H14O8	Mucic acid Dimethyl Ester	Phenolic acids	Phenolic acids	-	2	FALSE	up	155970	146490	122470	216840	208430	191990	137210	170780	117100	307470	243870	337390	--	--
pmn001669	C12H14O5	Methyl sinapate	Phenolic acids	Phenolic acids	20733-94-2	3	FALSE	down	2566.5	4596.3	3684.2	5023.1	4583.5	4749.5	17670	20451	23898	9194.5	6973.7	9067	--	--
mws1383	C12H10N4O2	Lumichrome	Alkaloids	Alkaloids	1086-80-2	3	down	FALSE	228700	211430	212390	116760	79213	105940	167060	76834	39861	55508	82024	74130	C01727	ko00740
ML10180524	C9H13N3O5	Cytarabine	Nucleotides and derivatives	Nucleotides and derivatives	147-94-4	1	up	up	2773700	4199000	3885800	17326000	13028000	11841000	3102900	3206500	5248900	12667000	9592900	7365700	C02961	--
pme3732	C9H13N3O5	Cytidine	Nucleotides and derivatives	Nucleotides and derivatives	65-46-3	1	up	up	1539800	2213200	2012500	9392200	7259000	7888800	1550100	1801100	2339100	7533000	4430600	4559900	C00475	ko00240,ko01100,ko02010
pme2266	C10H16N2O3S	Biotin	Others	Vitamin	58-85-5	2	down	FALSE	322370	273300	361380	141610	115840	121250	243730	215140	145370	104350	109860	149430	C00120	ko00780,ko01100,ko02010
pmb2591	C13H14N2O3	N-Acetyl-L-Tryptophan	Amino acids and derivatives	Amino acids and derivatives	1218-34-4	1	up	FALSE	10969000	10423000	11940000	35793000	32328000	33455000	17943000	23434000	27685000	39186000	38951000	28925000	--	--
mws0124	C13H14N2O3	N-(3-Indolylacetyl)-L-alanine	Amino acids and derivatives	Amino acids and derivatives	57105-39-2	2	up	FALSE	15131	26812	33570	37815	68081	64490	53479	15641	132230	52188	15174	24392	--	--
mws0655	C8H10NO6P	Pyridoxal-5'-phosphate	Others	Vitamin	54-47-7	3	FALSE	down	68938	58247	58761	37201	28722	46680	183160	262760	274870	55781	26847	41391	C00018	ko00730,ko00750,ko01100
Lmhn003373	C11H10O7	p-Hydroxybenzoylmalic acid	Phenolic acids	Phenolic acids	-	3	down	FALSE	354400	540590	574570	217270	180930	230720	586170	447600	613700	752840	555360	369780	--	--
Hmbp003234	C12H14O6	1-O-Caffeoylglycerol	Lipids	Glycerol ester	-	3	up	up	18914	18949	26346	220160	177340	145880	51264	56154	71105	151800	221290	180590	--	--
mws0361	C16H30O2	Palmitoleic Acid	Lipids	Free fatty acids	373-49-9	1	FALSE	down	12131	8712.8	18201	8496.8	7854	4353.7	15565	30265	17817	8643.8	5569.9	10836	C08362	ko00061
mws0120	C8H20NO6P	Choline Alfoscerate	Lipids	PC	28319-77-9	1	down	FALSE	95297	110970	171750	3899.8	7775.8	8315.7	32872	11879	13860	11037	5079.7	20223	C00670	ko00564,ko00565
Zmyn000110	C6H14NO8P	D-Glucosamine 1-phosphate	Others	Saccharides and Alcohols	2152-75-2	3	down	FALSE	27641	14529	13178	2501.3	8314.5	2854.9	6039.6	7813	3011.6	1783.8	3548.4	4971.1	C06156	ko00520,ko01100
mws1090	C6H13O9P	Glucose-1-phosphate*	Others	Saccharides and Alcohols	59-56-3	1	down	down	2469700	1620000	1707600	128700	87409	109230	2909400	3012800	1805500	124480	228590	539660	C00103	ko00010,ko00040,ko00052,ko00500,ko00520,ko00523,ko00561,ko01100,ko01110
mws0866	C6H13O9P	D-Glucose 6-phosphate*	Others	Saccharides and Alcohols	56-73-5	1	down	down	2680700	1542300	1516200	104850	77821	107460	2956900	3062300	1787300	115030	225300	535320	C00092	ko00500,ko00562,ko00998,ko01100,ko01110
MWS2442	C6H13O9P	D-Fructose 6-Phosphate	Others	Saccharides and Alcohols	643-13-0	1	down	down	1499700	950860	1000200	71693	46306	64318	1677900	1738200	1097400	70565	126600	314100	C00085	ko00052,ko00500,ko00710,ko01100,ko01110,ko01200
Zmpn000095	C6H15O9P	Sorbitol-6-phosphate	Others	Saccharides and Alcohols	20479-58-7	3	down	down	25769	18554	9241	8877.8	8899.2	5351.8	28468	29848	19856	2638.4	6732	2608.2	C01096	ko00051,ko01100
mws0715	C13H16N2O4	Phenylacetyl-L-glutamine	Amino acids and derivatives	Amino acids and derivatives	28047-15-6	1	up	up	43452	63556	46820	139890	171610	129820	10921	5686.7	13395	22907	41896	64503	C04148	ko00360
pme0230	C10H13N5O4	Adenosine	Nucleotides and derivatives	Nucleotides and derivatives	58-61-7	1	FALSE	down	17604000	20317000	20238000	22743000	20881000	21514000	14591000	18561000	17945000	7923600	6731500	10618000	C00212	ko00230,ko01100,ko02010
mws1060	C10H12N4O5	9-(Arabinosyl)hypoxanthine	Nucleotides and derivatives	Nucleotides and derivatives	7013-16-3	1	down	down	2436200	3261100	3561700	825740	788660	770270	4028600	2841000	2770500	918320	1055000	1348800	--	--
pme1119	C10H12N4O5	Inosine	Nucleotides and derivatives	Nucleotides and derivatives	58-63-9	3	FALSE	down	547580	595460	548910	422550	323440	262460	595700	558590	433340	166790	131930	184570	C00294	ko00230,ko01100,ko02010
pmp000087	C13H16O6	2-Feruloyl-sn-glycerol	Phenolic acids	Phenolic acids	-	1	up	FALSE	1412600	1646700	2379400	9732500	6242800	10226000	6831300	7362700	9582700	11512000	15621000	11716000	--	--
pmp000086	C13H16O6	1-Feruloyl-sn-glycerol	Phenolic acids	Phenolic acids	-	2	up	FALSE	1598100	2265600	2295800	6913400	7442700	10243000	5303800	7187000	11211000	16490000	14555000	11992000	--	--
MWSslk154	C12H20O7	Triethyl citrate	Organic acids	Organic acids	77-93-0	3	FALSE	down	33777	35076	32057	24758	30445	27568	62474	51643	53186	26008	24800	26993	--	--
pmb1574	C18H28O2	9,12-Octadecadien-6-Ynoic Acid	Lipids	Free fatty acids	61481-29-6	3	down	FALSE	587490	737500	1547000	192080	199130	245890	327300	299910	469690	314260	195910	217620	--	--
mws1038	C11H22N2O4S	Pantetheine	Others	Others	496-65-1	1	up	up	5419.7	3234.6	7637.4	56780	49321	26321	3655.7	7031.2	7611.8	37176	30779	23265	C00831	ko00332,ko00770,ko01110
pmb0889	C18H30O2	Punicic acid (9Z,11E,13Z-octadecatrienoic acid)	Lipids	Free fatty acids	544-72-9	1	down	FALSE	4429800	4649800	5084200	1934100	1872700	2297900	1787000	2578900	2342500	2532700	2173300	2474700	C08364	--
pmp001245	C15H22NO4+	Feruloylcholine	Alkaloids	Phenolamine	85927-25-9	1	up	FALSE	378080	402430	309040	897250	1025400	904120	574080	2392900	1172700	8363700	1560900	3011000	--	--
MWS4354	C11H15N5O4	N6-methyladenosine	Nucleotides and derivatives	Nucleotides and derivatives	1867-73-8	1	up	up	155220	247870	244700	1214500	1126900	968270	188740	162300	220510	1198400	902830	903860	--	--
Hmhp001812	C11H15N5O4	2'-O-Methyladenosine	Nucleotides and derivatives	Nucleotides and derivatives	2140-79-6	1	up	up	162420	212970	212350	1127700	872250	767320	240430	250660	313650	882130	767040	648090	--	--
Lmcp005230	C17H14O4	6-Hydroxy-2-[2-(4-hydroxyphenyl)ethyl]chromone	Others	Others	-	3	FALSE	down	5918.1	14975	6727.8	9611.9	10259	11493	40512	32155	38854	14052	18991	18707	--	--
mws0668	C10H12N4O6	Xanthosine	Nucleotides and derivatives	Nucleotides and derivatives	146-80-5	1	down	FALSE	3008400	3552700	4953900	1792900	1616600	1980500	5629200	4182400	4259200	3492500	3946700	3047800	C01762	ko00230,ko00232,ko01100,ko01110,ko02010
Zmzp006523	C15H10O6	6-Demethoxycapillarisin	Others	Others	61854-36-2	3	FALSE	up	8020.7	10082	13224	8218.7	6103.2	7386.5	3225.7	1474.8	1707.4	4420	3520	6022.5	--	--
mws1521	C13H18O7	Salicin	Phenolic acids	Phenolic acids	138-52-3	3	up	up	74015	45536	48575	85058	117980	158010	184700	186890	169030	505920	563970	307500	C01451	ko00010
mws1436	C18H38O2	1,18-Octadecanediol	Lipids	Free fatty acids	3155-43-9	2	up	down	6085.7	7112.8	5243.4	34343	71110	28592	93349	51232	75767	4665.4	5161.4	4172.6	--	--
pme3163	C7H15O10P	D-Sedoheptuiose 7-phosphate	Others	Saccharides and Alcohols	2646-35-7	3	down	down	818570	621740	722300	224710	162640	167130	452060	584030	726500	250850	130200	211410	--	--
pmb2657	C10H18N4O6	Argininosuccinic acid	Organic acids	Organic acids	2387-71-5	3	down	down	219320	133680	179580	13991	5960.4	9506.6	149750	151730	92321	11902	12643	47001	C03406	ko00220,ko00250,ko01100,ko01110,ko01230
Zmyn004732	C18H30O3	2R-hydroxy-9Z,12Z,15Z-octadecatrienoic acid	Lipids	Free fatty acids	-	3	down	FALSE	29742	28377	35953	11628	17153	15215	21574	17960	15656	13136	12414	11952	C16342	ko00592
Zmyn004676	C18H30O3	17-Hydroxylinolenic acid	Lipids	Free fatty acids	-	1	down	FALSE	1286400	1303100	1473200	475930	549960	545730	355270	648980	597540	685590	512870	685320	C16346	ko00592
Lmcp007250	C18H16O4	5-Hydroxy-6-methoxy-2-(2-phenylethyl)chromone	Others	Others	-	3	up	FALSE	4120.7	4689.2	2096.2	10289	10786	13450	7752.6	11545	5354.3	12986	8596.6	13612	--	--
Rfmb091	C18H32O3	9S-Hydroxy-10E,12Z-octadecadienoic acid*	Lipids	Free fatty acids	15514-85-9	1	down	FALSE	3097000	2797000	3454300	1215600	1353200	1423100	981580	1456000	1492700	1578600	1253200	1504900	C14767	ko00591
Lmbn005662	C18H32O3	9(10)-EpOME;(9R,10S)-(12Z)-9,10-Epoxyoctadecenoic acid	Lipids	Free fatty acids	16833-56-0	1	down	up	136430	124420	182140	65879	72078	39668	48171	64844	64665	103460	101050	165410	C14825	ko00591,ko01100
Lmbn005369	C18H32O3	13(S)-HODE;13(S)-Hydroxyoctadeca-9Z,11E-dienoic acid*	Lipids	Free fatty acids	10219-69-9	1	down	FALSE	3062800	2742100	3334800	1182800	1234700	1345400	919420	1436800	1449600	1549700	1119300	1441700	C14762	ko00591
pmb0197	C11H15N5O5	N7-Methylguanosine	Nucleotides and derivatives	Nucleotides and derivatives	20244-86-4	3	up	up	46707	55109	80093	443560	276410	208880	52090	61839	83246	213990	172910	117970	C20674	--
pmp000971	C16H12O6	6-Demethoxy-7-methylcapillarisin	Others	Others	-	2	FALSE	up	2589.9	9016.7	5672.6	3898.9	7330.4	7916.5	29335	11626	41054	213220	98972	63564	--	--
pmp000001	C16H12O6	Hispidulin (5,7,4'-Trihydroxy-6-methoxyflavone)*	Flavonoids	Flavonoid	1447-88-7	3	up	FALSE	23719	75326	54586	84961	135800	101030	17417	6841.6	31714	10042	13518	11331	C10058	--
mws0058	C16H12O6	Diosmetin (5,7,3'-Trihydroxy-4'-methoxyflavone)*	Flavonoids	Dihydroflavone	520-34-3	3	FALSE	up	23310	12643	11073	18578	24993	18816	13311	14836	30783	49221	34928	35106	C10038	--
Zmhp003514	C16H12O6	6,7,8-Tetrahydroxy-5-methoxyflavone	Flavonoids	Flavonoid	-	2	down	FALSE	10993	30988	31711	11329	10343	8963.4	187.52	1021.8	4195.9	457.51	1676.1	461.56	--	--
pmb3142	C13H16O8	Salicylic acid-2-O-glucoside	Phenolic acids	Phenolic acids	10366-91-3	3	FALSE	up	3441400	4115500	4309800	7516500	6620600	6899100	4259500	4905700	4403100	10850000	10739000	9800800	--	--
pmb3079	C8H16NO9P	N-Acetyl-D-glucosamine-1-phosphate	Others	Saccharides and Alcohols	6866-69-9	3	down	down	74709	41455	50371	2849.8	5364	6954.8	65378	88742	62392	1513	1794	10517	C04256	--
mws0920	C15H10O7	Tricetin (5,7,3',4',5'-Pentahydroxyflavone)	Flavonoids	Flavonoid	520-31-0	2	FALSE	up	35211	3323.2	2760.3	18134	12291	8211	821.21	647.28	3118.9	3240.7	6219.6	5224.3	C10192	ko00941
Cmsp004086	C16H14O6	Dihydrokaempferide	Flavonoids	Dihydroflavonol	137225-59-3	3	up	FALSE	27313	17177	6558.8	52061	65446	63639	206060	162190	135350	379260	341280	208230	--	--
Zmzn003953	C18H30O4	13(s)-hydroperoxy-(9z,11e,15z)-octadecatrienoic acid	Lipids	Free fatty acids	67597-26-6	3	FALSE	down	230300	162960	199290	200960	259030	244600	637620	485360	590670	260010	229580	306750	C04785	ko00592,ko01100,ko01110
pmn001606	C20H38O2	Eicosenoic acid	Lipids	Free fatty acids	26764-41-0	2	FALSE	down	681280	808190	591200	1034400	484710	466710	1623700	525920	710510	395180	321610	339190	C16526	ko01040
pme3967	C12H17N5O5	2-(Dimethylamino)guanosine	Nucleotides and derivatives	Nucleotides and derivatives	2140-67-2	1	up	FALSE	143480	193330	205510	551980	426770	322950	232820	186010	344530	359400	300780	228130	--	--
Lmcp002302	C12H17N5O5	N6-(2-Hydroxyethyl)adenosine	Nucleotides and derivatives	Nucleotides and derivatives	4338-48-1	1	up	FALSE	167630	197440	222310	563790	450380	342730	251760	198450	322420	414920	293850	246510	--	--
mws0636	C18H20N2O3	L-Phenylalanyl-L-phenylalanine	Amino acids and derivatives	Amino acids and derivatives	2577-40-4	1	up	FALSE	46908	51012	60628	135620	103350	96713	64955	30039	51608	63808	95780	73874	--	--
pmb2804	C18H32O4	13S-Hydroperoxy-9Z,11E-octadecadienoic acid	Lipids	Free fatty acids	33964-75-9	3	down	FALSE	95002	107670	102540	43263	52297	50334	45506	66056	73203	83624	56347	72696	C04717	ko00591,ko01100
Rfmb087	C18H32O4	9-Hydroxy-13-oxo-10-octadecenoic Acid	Lipids	Free fatty acids	-	1	down	FALSE	172150	179890	174900	49855	53678	63593	102870	112360	142180	76561	75422	67898	--	--
Lmbn005822	C18H34O4	9,10-DHOME; (12Z)-9,10-Dihydroxyoctadec-12-enoic acid	Lipids	Free fatty acids	263399-34-4	3	FALSE	up	628.56	1140.5	1275.5	357.67	85.145	756.07	484.36	652.82	473.93	1685.6	1517.7	841.3	C14828	ko00591
Zmzp004111	C16H12O7	Selagin	Flavonoids	Flavonoid	-	2	FALSE	up	5916.5	20784	15210	17687	13468	30270	50318	32473	97422	183660	357460	730680	--	--
mws0988	C16H12O7	Rhamnetin	Flavonoids	Flavonols	90-19-7	1	up	FALSE	7132.7	6492.4	3112.2	7658.4	16670	19513	54887	8267.1	108640	25589	11646	4845.3	C10176	--
MWSHY0068	C16H12O7	Isorhamnetin	Flavonoids	Flavonols	480-19-3	1	FALSE	up	80667	17510	16062	35232	70418	109760	352980	305160	662340	1098300	1070900	577230	C10084	--
Zmzp006646	C16H12O7	Capillarisin	Others	Others	56365-38-9	1	FALSE	up	450170	112640	107210	220670	407140	736100	2035000	1833600	3805600	6207900	6510200	3498200	C08999	--
Hmtn001120	C14H20O8	5-(2-Hydroxyethyl)-2-O-glucosylphenol	Phenolic acids	Phenolic acids	-	1	up	up	284840	309570	326510	1234800	1287300	941440	425590	357200	390040	1443200	1616900	942080	--	--
mws0582	C11H19N3O6S	S-(Methyl)glutathione	Amino acids and derivatives	Amino acids and derivatives	2922-56-7	1	FALSE	down	34187	47499	60226	62721	79460	60584	53128	69944	72275	30183	23033	26550	C11347	--
MWSslk257	C9H14N3O8P	Cytidine 5'-monophosphate(Cytidylic acid)	Nucleotides and derivatives	Nucleotides and derivatives	63-37-6	3	up	up	189740	290890	268990	638640	691430	1074400	213180	264570	464180	806040	697980	821760	C00055	ko00240,ko01100
pme3188	C9H13N2O9P	Uridine 5'-monophosphate	Nucleotides and derivatives	Nucleotides and derivatives	58-97-9	1	up	up	849270	2667600	2229900	4401500	4170600	5483500	1213100	2471000	3646000	3899900	5128300	5890500	C00105	ko00240,ko01100
Lmsn003111	C15H18O8	1-O-p-Coumaroyl-β-D-glucose	Phenolic acids	Phenolic acids	7139-64-2	1	up	FALSE	1214600	1585300	1086900	4088300	5968400	2828200	4826300	3330900	4643300	8105200	6887300	7516800	C16827	--
MWSmce278	C21H26O3	Acitretin	Others	Vitamin	55079-83-9	2	FALSE	up	9314.8	4849.1	3495.9	5601.6	7272	6139.9	5630.4	6934.3	4858.6	7978.2	17224	12061	--	--
pmn001691	C18H32O5	9,12,13-Trihydroxy-10,15-octadecadienoic acid	Lipids	Free fatty acids	-	1	down	FALSE	1070200	1077100	1116400	237860	272080	344080	767820	766380	672110	676740	515160	910020	--	--
mws0371	C22H32O2	Cis-4,7,10,13,16,19-Docosahexaenoic Acid	Lipids	Free fatty acids	6217-54-5	3	FALSE	down	1683.7	1316.6	3329.9	1204.9	1083.7	2277.4	2879.5	5298.3	3548.8	1582.9	1553	2197.7	C06429	ko01040
Lmtn002565	C14H18O9	1-O-Vanilloyl-D-Glucose	Phenolic acids	Phenolic acids	-	1	FALSE	up	198090	256120	229270	355270	309450	367880	221360	173470	300480	454740	424800	523600	C20470	--
Hmqn003054	C18H34O5	9,10,11-Trihydroxy-12-octadecenoic acid	Lipids	Free fatty acids	61911-67-9	1	down	FALSE	372440	338410	375350	89973	92048	101460	191910	207080	227710	193960	143500	189280	--	--
Lmbn004240	C18H34O5	9,10-Dihydroxy-12,13-epoxyoctadecanoic acid	Lipids	Free fatty acids	-	2	FALSE	up	8758.4	4775.6	4702.1	14352	7811.9	7455.8	1465.3	1345.1	603.84	2600.5	2666.6	3524	C14837	ko00591
pmn001694	C18H34O5	9,10,13-Trihydroxy-11-Octadecenoic Acid	Lipids	Free fatty acids	29907-57-1	1	down	FALSE	6518700	5893300	6371200	1396900	1516600	1640100	3389600	3488700	3683600	3135800	2290300	3114500	C14835	ko00591
pme3184	C10H14N5O6P	2'-Deoxyadenosine-5'-monophosphate	Nucleotides and derivatives	Nucleotides and derivatives	653-63-4	2	down	down	271640	232050	265620	106820	104600	107090	173210	247340	215140	96997	117260	97542	C00360	ko00230,ko01100
MWStz294	C20H20N2O3	N-Feruloyltryptamine	Alkaloids	Plumerane	53905-13-8	1	up	FALSE	110000	150850	159790	1632300	1002900	629420	85402	378490	641890	1126800	393200	428170	--	--
MWS2673	C20H34O4	5,6-DiHETrE [5,6-dihydroxy-8Z,11Z,14Z-eicosatrienoic acid]	Lipids	Free fatty acids	213382-49-1	3	up	up	4327.4	9830	7746.1	49859	24791	40678	12964	19103	13788	39290	30302	65296	C14772	ko00590,ko01100
pme3311	C6H14O12P2	D-Fructose-1,6-biphosphate	Others	Saccharides and Alcohols	488-69-7	3	down	down	50652	14700	20670	8277.9	7622.6	12443	42279	48458	23786	13766	6406	6880.1	C00354	ko00400,ko00710,ko01100,ko01110,ko01200
Zmyn000083	C6H14O12P2	D-Glucose 1,6-bisphosphate	Others	Saccharides and Alcohols	10139-18-1	3	down	down	37973	26192	27234	717.06	1720.6	2872.5	41542	32909	24368	4273.8	2564.7	7128.5	C01231	ko00500,ko01100
pme0519	C12H22O11	D-Sucrose*	Others	Saccharides and Alcohols	57-50-1	1	FALSE	down	299670	462960	330490	209430	225450	154820	331130	311930	660240	84388	163180	171730	C00089	ko00052,ko00500,ko01100,ko01110,ko02010
mws1333	C12H22O11	Melibiose	Others	Saccharides and Alcohols	585-99-9	1	FALSE	down	165160	315670	160310	86941	165550	130270	239450	274600	284730	62591	108690	78126	C05402	ko00052,ko01100,ko02010
mws5038	C12H22O11	Isomaltulose*	Others	Saccharides and Alcohols	13718-94-0	1	FALSE	down	257950	445930	489320	99299	235970	327720	375930	336050	477770	22344	116180	133620	C01742	--
mws1080	C12H22O11	Galactinol	Others	Saccharides and Alcohols	3687-64-7	1	FALSE	down	468160	453650	376780	392970	449560	647150	984430	637810	883980	164190	330760	665570	C01235	ko00052,ko01100
Lmsn000381	C12H22O11	D-Maltose*	Others	Saccharides and Alcohols	133-99-3	1	down	down	203040	489510	419140	163640	165730	34970	319360	326700	828830	17391	210090	122280	C01971	--
MA10039641	C12H22O11	Lactobiose	Others	Saccharides and Alcohols	63-42-3	1	down	FALSE	247240	601630	485430	107400	139590	198280	302760	276440	612400	7272	134950	247960	C00243	ko00052,ko01100,ko02010
mws0264	C12H22O11	D-Trehalose*	Others	Saccharides and Alcohols	99-20-7	1	FALSE	down	160480	319060	208710	141990	118640	159570	265730	172280	403820	19149	114660	119800	C01083	ko00500,ko01100,ko01110,ko02010
HJAP050	C19H21NO5	N-Feruloyl-3-methoxytyramine	Alkaloids	Phenolamine	78510-19-7	1	up	FALSE	1735400	1700700	2239000	17656000	14834000	3911600	1122100	1706200	6743000	6651400	2429400	3907500	--	--
mws0609	C10H12N5O7P	Guanosine 3',5'-cyclic monophosphate	Nucleotides and derivatives	Nucleotides and derivatives	7665-99-8	1	FALSE	down	740270	2295300	1996000	1059600	989290	1204200	1388200	1217800	3762200	378890	829200	998180	C00942	ko00230,ko01100
mws0874	C10H14N5O7P	3'-Adenylic Acid	Nucleotides and derivatives	Nucleotides and derivatives	84-21-9	1	down	down	374710	395820	354570	171500	167200	186150	244050	376660	505150	92077	104030	164190	C01367	ko00230,ko01100
pmb0981	C10H14N5O7P	Adenosine 5'-monophosphate	Nucleotides and derivatives	Nucleotides and derivatives	61-19-8	1	down	down	15184000	12835000	13697000	1448300	1162400	1697500	7594000	5416400	5380400	902340	1103600	991600	C00020	ko00230,ko00908,ko01100,ko01110
pmb0532	C10H13N4O8P	Inosine 5'-monophosphate	Nucleotides and derivatives	Nucleotides and derivatives	131-99-7	3	down	down	1189900	950420	1125100	110660	93922	128960	611290	426210	409480	63200	81016	86895	C00130	ko00230,ko01100,ko01110
pmb1562	C21H34O4	1-Stearidonoyl-Glycerol	Lipids	Glycerol ester	-	1	up	FALSE	9890.4	18997	24425	36941	34254	37094	8395.2	14192	4611.2	6994.6	6895.6	2804.7	--	--
MWStz224	C20H20N2O4	N-Feruloylserotonin	Alkaloids	Plumerane	68573-23-9	2	up	up	87203	46693	245200	1399900	1981400	1960100	383860	618360	953210	2284000	3563700	2770400	--	--
MWStz202	C20H20N2O4	cis-Moschamine	Alkaloids	Plumerane	193224-24-7	2	up	up	109420	92599	182080	1713500	958510	2146300	547110	523620	897410	3356700	3992000	2262700	--	--
pme1816	C16H18O9	Neochlorogenic acid (5-O-Caffeoylquinic acid)*	Phenolic acids	Phenolic acids	906-33-2	1	up	down	30406	12744	327020	1298600	1039200	1486300	1493300	1552100	1762200	20839	84661	151110	C17147	--
mws0178	C16H18O9	Chlorogenic acid (3-O-Caffeoylquinic acid)*	Phenolic acids	Phenolic acids	327-97-9	1	up	down	16499	19552	342120	1297400	1352200	1786200	1974100	1568200	1959800	19566	104020	191260	C00852	ko00940,ko00941,ko00945,ko01110
mws2108	C16H18O9	Cryptochlorogenic acid (4-O-Caffeoylquinic acid)	Phenolic acids	Phenolic acids	905-99-7	2	up	down	17255	21430	269970	1019800	867090	1174900	1253800	1241100	1186900	12982	72668	109040	--	--
pmb0296	C21H40O4	1-Oleoyl-Sn-Glycerol	Lipids	Glycerol ester	129784-87-8	2	up	FALSE	932370	1138500	1064800	2057800	1558500	2828600	1277000	1967900	1183000	1907500	1185400	2990200	--	--
pmb0998	C10H14N5O8P	Guanosine 5'-monophosphate	Nucleotides and derivatives	Nucleotides and derivatives	85-32-5	2	down	down	657620	414620	394320	85136	18720	121920	295970	228420	189370	16923	25530	6760.4	C00144	ko00230,ko01100
pmn001695	C16H20O10	Trihydroxycinnamoylquinic acid	Phenolic acids	Phenolic acids	-	2	up	up	72240	109980	105860	359970	401890	342710	102010	88475	145650	332700	371270	315220	--	--
mws0232	C17H20N4O6	Riboflavin (Vitamin B2)	Others	Vitamin	83-88-5	1	up	FALSE	988860	645040	782760	3575300	2814500	3402700	792840	1157700	799940	1721100	1580900	1430200	C00255	ko00740,ko01100,ko01110,ko02010
Hmmp003004	C17H24O10	Vogeloside	Others	Others	60077-47-6	3	FALSE	up	1402700	2637500	1696700	2100300	1808300	2543000	267210	137670	256700	470900	616360	1381600	--	--
Cmjn004337	C18H26O10	Benzyl-(2''-O-xylosyl)glucoside	Phenolic acids	Phenolic acids	-	3	down	FALSE	73816	67892	65062	12562	26096	32849	38763	32879	49575	34147	37551	35563	--	--
pme3007	C9H14N2O12P2	Uridine 5'-diphosphate	Nucleotides and derivatives	Nucleotides and derivatives	27821-45-0	1	down	down	88733	86323	117590	24274	21145	31543	82429	91184	89962	18092	25713	31900	C00015	ko00240,ko00908,ko01100
pmd0152	C19H39O7P	LysoPA 16:0 (2n isomer)	Lipids	Glycerol ester	-	3	down	down	39321	32835	35649	10873	11782	20883	19129	24366	25292	5427.2	3360.2	6264.6	--	--
Lmbp003668	C20H18O10	Kaempferol-3-O-arabinoside	Flavonoids	Flavonols	-	2	up	FALSE	85162	160350	160760	321340	275720	267860	238870	176430	347220	459840	473140	372880	--	--
mws1089	C12H23O14P	Sucrose-6-phosphate	Others	Saccharides and Alcohols	-	3	down	FALSE	21269	10805	14059	2982	4490.9	3950.5	5198	32581	16238	9971.7	7006.3	24544	--	--
pmb0864	C19H40NO7P	LysoPE 14:0	Lipids	LPE	-	1	down	down	322860	302370	348080	72818	45368	92175	141460	149010	144230	43564	44863	104490	--	--
Lmhp008337	C19H40NO7P	LysoPE 14:0(2n isomer)	Lipids	LPE	-	1	down	down	117320	98363	113690	12670	7938.1	17245	46855	48316	47001	9027.8	7300.7	21476	--	--
pmp000436	C30H50O	Taraxerol	Terpenoids	Triterpene	127-22-0	2	FALSE	up	17167	17473	22656	36872	25067	43941	24496	23271	24199	71811	39906	79103	C08637	ko00909,ko01110
pme2117	C10H15N5O10P2	Adenosine 5'-diphosphate	Nucleotides and derivatives	Nucleotides and derivatives	58-64-0	3	down	down	397750	311740	332990	47935	24372	40516	348950	282400	199230	31893	27632	45544	C00008	ko00190,ko00195,ko00230,ko00908,ko01100,ko01110
pmp000117	C22H24O9	3,5,6,7,8,3',4'-Heptamethoxyflavone	Flavonoids	Flavonols	1178-24-1	2	FALSE	down	743.5	2139.4	1841.1	2200.5	2612.3	3889.2	6244	5702.8	5156.8	1946	1545.4	1875.4	--	--
Lmtn002324	C19H28O11	Benzyl-(2''-O-glucosyl)glucoside	Phenolic acids	Phenolic acids	-	2	up	up	25127	21574	25268	141250	128300	153110	53290	34550	41408	140300	169620	157720	C17564	--
mws2186	C20H18O11	Avicularin(Quercetin-3-O-α-L-arabinofuranoside)	Flavonoids	Flavonols	572-30-5	1	FALSE	up	21729	6424.2	5571.8	9317.2	51769	59803	305750	260090	591400	1070200	1046800	741410	--	--
Lmdp003509	C20H18O11	Quercetin-3-O-xyloside (Reynoutrin)	Flavonoids	Flavonols	549-32-6	3	FALSE	up	41247	6726	23537	38600	50321	90785	418860	347150	665980	1382400	1296500	981730	--	--
Lmhp008440	C20H40NO7P	LysoPE 15:1	Lipids	LPE	-	2	down	FALSE	35870	32211	30711	6463.5	6609.7	8282.8	15749	19037	19295	7185	6799.2	19901	--	--
Lmhp008273	C20H40NO7P	LysoPE 15:1(2n isomer)	Lipids	LPE	-	2	down	FALSE	10295	9479.4	12654	2517	1800.1	1767.3	4680.2	6726.3	6411	1359.5	2293.8	5377.6	--	--
pmb0862	C20H42NO7P	LysoPC 12:0	Lipids	LPC	20559-18-6	3	down	down	6914.4	11531	14713	6192.3	4605.2	4872	37082	32919	34732	3386.3	2466.4	5765.7	--	--
Lmhp009187	C20H42NO7P	LysoPE 15:0	Lipids	LPE	-	1	down	down	283940	233220	275050	35362	37448	62864	92228	101360	74315	25483	23686	70769	--	--
Lmhp008885	C20H42NO7P	LysoPE 15:0(2n isomer)	Lipids	LPE	-	1	down	down	112470	89457	105640	9435.3	7288.1	14651	31463	30232	27728	3810.8	8249.1	19093	--	--
pmn001338	C21H18O11	Rhein-8-O-glucoside	Quinones	Anthraquinone	34298-86-7	2	FALSE	down	15818	11486	15238	10749	14801	11894	9583.8	15709	10637	3082.5	10648	2239.5	--	--
Lmjp004533	C22H22O10	Kisasagenol A Triacetate	Terpenoids	Terpene	-	1	FALSE	down	100220	187650	150750	73267	59649	120560	28509	24532	42449	10977	5667.2	19277	--	--
Lmhp007836	C21H38NO7P	LysoPE 16:3	Lipids	LPE	-	2	down	down	531690	537930	594320	38304	38336	67068	236990	283880	217470	29884	37334	80023	--	--
Hmcp002316	C21H20O11	Isorhamnetin-3-O-arabinoside	Flavonoids	Flavonols	-	1	up	FALSE	19660	8809.4	4868.5	38829	29020	63162	324370	275540	633950	796650	1085000	537550	--	--
Hmpp003270	C21H20O11	Luteolin-4'-O-glucoside	Flavonoids	Flavonoid	6920-38-3	1	up	FALSE	560650	832020	776820	1674100	1518800	1614200	2833900	1835600	2690600	3073600	3278200	3090000	--	--
Lmsp004301	C21H22O11	3',5,5',7-Tetrahydroxyflavanone-7-O-glucoside	Flavonoids	Dihydroflavone	-	2	up	FALSE	95361	196850	290650	606130	662090	491250	85031	40223	112670	47194	96247	140970	--	--
mws0057	C21H22O11	Eriodictyol-7-O-glucoside	Flavonoids	Dihydroflavone	38965-51-4	2	up	FALSE	127080	184880	163380	431370	362320	241680	25530	23615	46440	23224	58462	44351	--	--
Lmtn002796	C21H22O11	Aromadendrin-7-O-glucoside	Flavonoids	Dihydroflavonol	28189-90-4	3	down	FALSE	30305	35267	29870	12568	11813	5600.5	30612	22242	17152	1817.2	10904	19556	--	--
HJN086	C21H22O11	Eriodictyol-3'-O-glucoside	Flavonoids	Dihydroflavone	-	3	FALSE	up	7274.6	9276.6	6005.9	4351.1	21836	10885	16824	11694	29010	129300	124710	124890	--	--
Lmhp008763	C21H42NO7P	LysoPE 16:1(2n isomer)	Lipids	LPE	-	1	down	down	1134800	944090	1024200	125550	126810	195300	417580	430620	498010	118060	123610	268190	--	--
Lmhp009034	C21H42NO7P	LysoPE 16:1	Lipids	LPE	-	1	down	down	1106500	993350	1025100	134720	118070	205780	407070	518250	461750	124140	127060	252030	--	--
Lmqn005404	C20H20O12	4-Hydroxybenzoyl-1-O-(6''-O-galloyl)glucoside	Phenolic acids	Phenolic acids	-	2	down	down	81398	62115	66382	29687	23301	29522	75573	74865	67508	24650	21665	44676	--	--
pmb0876	C21H44NO7P	LysoPE 16:0	Lipids	LPE	53862-35-4	1	down	down	818310	664630	669680	100680	85578	146270	206340	233570	195170	50097	51420	156000	--	--
pmd0160	C21H44NO7P	LysoPE 16:0(2n isomer)	Lipids	LPE	-	1	down	down	756370	622660	652910	84490	76113	150210	190230	217940	200250	47001	40818	144420	--	--
MWSmce052	C30H48O3	3-Epiursolic acid	Terpenoids	Triterpene	989-30-0	2	down	FALSE	2987.3	2370.5	4062.7	1821.2	468.2	1338.8	279.92	638.95	15940	2400.4	729.58	436.52	--	--
Lmzn001894	C21H18O12	Kaempferol-3-O-glucuronide	Flavonoids	Flavonols	22688-78-4	1	FALSE	up	3289700	4541800	4790200	7387400	7092100	5916300	1316300	1077800	1564000	2940700	2910200	2770300	--	--
pmp000579	C22H22O11	Diosmetin-7-O-galactoside	Flavonoids	Dihydroflavone	-	3	FALSE	up	154820	203410	193430	236560	273730	214340	284760	102840	295840	675130	585170	404490	--	--
Hmcp002539	C22H22O11	Isorhamnetin-3-O-rhamnoside	Flavonoids	Flavonols	-	3	FALSE	up	509.31	1587.7	2168.9	2875.7	4467.5	2241.3	95679	85224	174100	370080	489670	176830	--	--
pmp000233	C22H22O11	Swertiajaponin	Flavonoids	Flavonoid carbonoside	6980-25-2	3	FALSE	down	168180	181090	194000	92328	86770	96626	58218	57131	37405	4259.8	4805	24000	C10187	--
MWS0155	C14H18N5O11P	Adenylocuccinic Acid	Organic acids	Organic acids	19046-78-7	3	down	down	29262	23171	33438	10764	9498.2	6432	30402	33622	19994	299.22	1879.1	6491.6	C03794	ko00230,ko00250,ko01100
Hmcn001884	C21H20O12	6-Hydroxyluteolin 5-glucoside	Flavonoids	Flavonoid	-	1	up	FALSE	33294	6854	5145	25966	58414	81699	228510	216580	358680	160250	157040	203980	--	--
Lmhp009769	C22H44NO7P	LysoPE 17:1	Lipids	LPE	-	1	down	FALSE	19362	11407	12904	5891.2	4203.2	4710.1	8938.6	7744.5	12134	5631.7	3729.3	18065	--	--
Lmhp009464	C22H44NO7P	LysoPE 17:1(2n isomer)	Lipids	LPE	-	1	down	down	205250	182060	199560	34456	29267	43731	80393	81505	83986	21866	22100	51460	--	--
Xmsn002700	C21H22O12	Taxifolin-3'-O-glucoside	Flavonoids	Dihydroflavonol	31106-05-5	3	FALSE	down	58646	35161	31264	37167	35847	33250	55772	62595	72599	37289	20310	36013	--	--
Lmhp010162	C22H46NO7P	LysoPE 17:0	Lipids	LPE	-	3	down	FALSE	44924	42811	38704	11419	12086	14591	21403	19533	19057	7169.3	5265.9	32750	--	--
Lmhp008233	C23H40NO7P	LysoPE 18:4	Lipids	LPE	-	3	down	down	40133	32382	30974	4709.3	3740.7	5096.2	9514.9	17293	13517	3496.2	1076.7	7453.8	--	--
Lmhp008589	C23H42NO7P	LysoPE 18:3(2n isomer)	Lipids	LPE	-	1	down	down	21873000	20590000	22518000	4374000	3678200	5479500	14081000	15745000	15010000	4029800	3985000	7969200	--	--
Lmhp008801	C23H42NO7P	LysoPE 18:3	Lipids	LPE	-	1	down	down	23586000	21707000	21921000	4465000	3729000	5513500	13239000	15776000	14598000	3929000	4156500	7791900	--	--
pmp000583	C22H20O12	Diosmetin-7-O-glucuronide	Flavonoids	Dihydroflavone	35110-20-4	2	FALSE	down	2676900	2535000	2942300	1760000	1908200	1729400	661700	786600	753660	227750	254650	329110	--	--
pmb0874	C23H44NO7P	LysoPE 18:2(2n isomer)	Lipids	LPE	-	1	down	down	892520	870420	941150	178040	142490	217210	412110	467440	488510	138450	131980	244340	--	--
pmb0881	C23H44NO7P	LysoPE 18:2	Lipids	LPE	-	1	down	down	889950	862970	921820	181670	148610	216890	419760	444320	500110	154270	146730	244330	--	--
Hmjp003123	C21H18O13	Quercetin-5-O-glucuronide	Flavonoids	Flavonols	-	2	up	up	1548100	815620	393110	1734200	7603600	6620700	9696700	6885400	12220000	20220000	21214000	16339000	--	--
Lmfn003760	C21H18O13	Quercetin-4'-O-glucuronide	Flavonoids	Flavonols	201463-36-7	1	up	up	366340	243620	138970	487770	1652200	1658500	2206600	1954900	2872200	5965200	4845200	5222300	--	--
Lmsn003409	C22H22O12	1-O-Galloyl-6-O-p-Coumaroyl-β-D-glucose	Phenolic acids	Phenolic acids	-	3	down	FALSE	14105	11359	10058	1822.9	3658	1833.6	5065.7	1355.7	893.76	1352.7	922.03	889.2	--	--
Lmsn004162	C22H22O12	1-O-Galloyl-2-O-p-Coumaroyl-β-D-glucose	Phenolic acids	Phenolic acids	94356-18-0	3	up	FALSE	16342	8240.2	4059.8	15148	41378	74799	82685	52229	98974	151800	157740	152530	--	--
Lmjp002906	C22H22O12	Rhamnetin-3-O-Glucoside	Flavonoids	Flavonols	27875-34-9	1	FALSE	up	179020	67904	63438	153370	193800	490690	2132400	1649200	4009000	4251900	5539800	6047600	--	--
Lmjp003044	C22H22O12	Isorhamnetin-3-O-Glucoside*	Flavonoids	Flavonols	5041-82-7	1	FALSE	up	181880	87033	66705	166200	213930	488030	2136700	1885100	4026400	4414900	5536800	6487800	--	--
Lmjp003295	C22H22O12	6-Methoxykaempferol-3-O-glucoside	Flavonoids	Flavonols	63422-27-5	3	up	up	101280	78955	58948	131640	208690	374710	2245200	1840600	3748400	4708700	6084800	6662500	--	--
Hmgp002036	C22H22O12	Nepetin-7-O-glucoside	Flavonoids	Flavonoid	569-90-4	1	up	up	121610	71604	44971	122540	204510	529390	2329300	1788200	3703000	4646600	5634200	6377800	--	--
mws0289	C23H46NO7P	LysoPE 18:1	Lipids	LPE	89576-29-4	1	down	down	15708000	12308000	14406000	2668500	2487800	3734500	6383600	6708800	5264100	1524500	1813800	3261300	--	--
pmb0856	C23H46NO7P	LysoPE 18:1(2n isomer)	Lipids	LPE	-	1	down	down	10685000	7955400	9684900	1774300	1682000	2497700	4088500	4382300	3468400	1025800	1097600	1946400	--	--
pmb2260	C23H46NO7P	LysoPC 15:1	Lipids	LPC	-	2	down	FALSE	128220	131970	127070	60658	62868	58988	122400	97896	122620	93945	83305	139740	--	--
pmb0883	C23H48NO7P	LysoPE 18:0	Lipids	LPE	69747-55-3	1	down	down	391810	343730	328820	50636	46865	89804	143590	183560	171860	30147	37279	92784	--	--
Lmhp009129	C23H48NO7P	LysoPC 15:0(2n isomer)	Lipids	LPC	-	1	down	FALSE	277980	251180	306930	81838	67957	95047	160200	156030	114390	59115	57090	121920	--	--
pmb0880	C23H48NO7P	LysoPE 18:0(2n isomer)	Lipids	LPE	-	1	down	down	216490	156400	180530	34194	31954	45217	80604	83511	68539	19017	21791	42940	--	--
Lmsp005625	C22H18O13	3-O-Methylellagic acid-4'-O-(5''-O-acetyl)arabinoside	Tannins	Tannin	-	3	FALSE	down	3309.5	1852.3	1009.4	1357.9	2404.9	2374.7	2691.2	4975	4008.2	1154.1	632.57	1357	--	--
Lmmn003398	C23H22O12	Kaempferol-3-O-(6''-acetyl)glucoside	Flavonoids	Flavonols	-	3	down	up	39262	56356	61133	5019.5	17038	8198.3	15333	13867	15778	34328	36306	30468	--	--
pma1303	C24H46NO7P	LysoPC 16:2	Lipids	LPC	-	1	down	down	700490	691950	801510	136350	123290	139000	399830	390650	363600	142790	145500	203720	--	--
pmb0863	C24H46NO7P	LysoPC 16:2(2n isomer)	Lipids	LPC	-	1	down	down	697560	692250	834280	137000	126840	146680	384250	396590	383680	162010	138330	210930	--	--
Lmhp008833	C24H48NO7P	LysoPC 16:1(2n isomer)	Lipids	LPC	-	1	down	FALSE	5463200	4672500	5311900	1207400	1198000	1394500	2624100	2720000	2622700	1465100	1396200	1781500	--	--
pmp001270	C24H48NO7P	LysoPC 16:1	Lipids	LPC	76790-27-7	1	down	FALSE	5121800	4721800	5281600	1252600	1091700	1309900	2430100	2620200	2381200	1439400	1407100	1835900	--	--
HJN054	C25H34O10	Secoisolariciresinol-9'-O-xyloside	Lignans and Coumarins	Lignans	-	3	FALSE	up	708920	747980	777520	1142300	1085100	993070	63737	118630	113450	246920	299780	245260	--	--
pmb0855	C24H50NO7P	LysoPC 16:0	Lipids	LPC	17364-16-8	1	down	FALSE	20680000	18663000	20872000	8814600	6884600	9558100	10686000	10248000	9119400	6019800	6383400	10498000	--	--
pmd0132	C24H50NO7P	LysoPC 16:0(2n isomer)	Lipids	LPC	-	1	down	FALSE	22064000	19258000	22139000	9717400	7227100	10148000	11408000	11061000	9675300	6483300	6723300	12022000	--	--
Lmhp009349	C25H44NO7P	LysoPE 20:4(2n isomer)	Lipids	LPE	-	3	down	FALSE	2897.3	3062.6	2196.5	661.37	160.4	564.18	1458.8	1622.4	1050.7	1136.4	1060.2	1532.3	--	--
Lmhp009802	C25H46NO7P	LysoPE 20:3(2n isomer)	Lipids	LPE	-	2	down	down	87560	73014	86617	16636	14535	21419	38878	38104	43329	14250	17573	26412	--	--
Lmhp010040	C25H46NO7P	LysoPE 20:3	Lipids	LPE	-	2	down	down	91185	77246	92263	17532	13282	21666	42319	42391	45562	13067	15006	25362	--	--
pmb3000	C24H24O12	Chrysoeriol-7-O-(6''-acetyl)glucoside	Flavonoids	Flavonoid	-	2	FALSE	down	5423.2	10254	8748.8	6419	9799.8	3648	38569	15338	24176	16950	10296	4832.5	--	--
Lmhp010757	C25H48NO7P	LysoPE 20:2	Lipids	LPE	-	1	down	down	323310	296670	324390	43457	37216	58625	96119	106540	117400	37047	37013	69422	--	--
Lmhp010514	C25H48NO7P	LysoPE 20:2(2n isomer)	Lipids	LPE	-	1	down	down	328070	277510	321720	38466	33533	53541	86421	110240	107960	41322	32386	61457	--	--
Lmhp008718	C25H48NO7P	LysoPC 17:2	Lipids	LPC	-	1	down	FALSE	430920	409340	462410	96015	93794	106230	182380	183690	202320	97415	87799	112460	--	--
pmb3045	C23H22O13	Tricin-7-O-Glucuronide	Flavonoids	Flavonoid	-	2	up	FALSE	18908	33126	28958	166990	83251	129890	46184	33660	34630	83230	78042	54528	--	--
Hmln002199	C23H22O13	Quercetin-3-O-(6''-acetyl)galactoside	Flavonoids	Flavonols	-	3	FALSE	up	5457	1209.5	9648	3679	9835.8	8564.5	19830	15777	5709.8	39784	55410	73054	--	--
Lmhp009590	C25H50NO7P	LysoPC 17:1	Lipids	LPC	-	1	down	FALSE	886480	701840	858340	182460	201850	175690	362020	335490	256070	188350	149120	224920	--	--
Lmhp010515	C25H52NO7P	LysoPC 17:0(2n isomer)	Lipids	LPC	-	1	down	FALSE	301690	306630	340710	163240	121570	168650	204100	191850	188280	94041	126820	278310	--	--
pmb2406	C25H52NO7P	LysoPC 17:0	Lipids	LPC	50930-23-9	1	down	FALSE	792870	707880	811350	394630	292950	365140	483120	410760	359270	242820	253690	433770	--	--
Hmqp006235	C26H46NO7P	LysoPC 18:4	Lipids	LPC	-	1	down	FALSE	314130	305640	379070	47470	44344	39672	70581	81126	98602	63234	28488	73637	--	--
pmn001382	C25H24O12	Isochlorogenic acid A	Phenolic acids	Phenolic acids	2450-53-5	2	up	down	9633.5	2687.2	40693	140140	160650	205710	1046700	1026600	801180	2420	9507	32117	--	--
MWSmce346	C25H24O12	1,3-Dicaffeoylquinic acid	Phenolic acids	Phenolic acids	19870-46-3	3	up	down	3898.5	6746.2	4484	23465	35942	42592	673810	632520	500580	6686.6	10438	16371	C10445	--
Li512115	C25H24O12	Isochlorogenic acid B*	Phenolic acids	Phenolic acids	14534-61-3	2	up	down	23823	23379	61473	435070	302960	404000	991840	1253000	982900	1497	12480	16631	C10468	--
pmn001384	C25H24O12	Isochlorogenic acid C*	Phenolic acids	Phenolic acids	57378-72-0	2	up	down	15808	15408	56867	468460	369000	421380	1051300	1200900	969390	2217.2	6865.8	13911	--	--
pmb0865	C26H48NO7P	LysoPC 18:3(2n isomer)	Lipids	LPC	-	1	down	down	465000	479570	523140	136980	122990	147630	308980	324360	276860	141180	125060	179860	--	--
pmb0854	C26H48NO7P	LysoPC 18:3	Lipids	LPC	-	1	down	FALSE	18387000	17684000	19076000	4772900	4546100	5007000	11575000	11357000	11022000	5089200	5530900	6998700	--	--
pmp001273	C26H50NO7P	LysoPC 18:2	Lipids	LPC	-	1	down	FALSE	9759900	10625000	9835400	3471200	3392400	3763500	5569900	6134800	6061600	3928300	3381400	4855300	--	--
pmp001251	C26H50NO7P	LysoPC 18:2(2n isomer)	Lipids	LPC	-	1	down	FALSE	1018600	1049100	1060400	369840	353910	374750	574430	568580	611810	378760	327320	444340	--	--
pmn001378	C26H32O11	Pinoresinol-4-O-glucoside	Lignans and Coumarins	Lignans	41607-20-9	2	down	down	125880	88924	85057	17955	6652.2	20006	293840	249240	188310	109880	133870	92214	C17529	--
Lmsp003655	C26H32O11	Dehydrodiconiferyl alcohol-gamma'-O-glucoside	Phenolic acids	Phenolic acids	-	1	up	FALSE	656900	532010	642890	1543800	1369400	1367300	2780100	2732600	3218900	3509100	2818900	2037500	--	--
pmp001281	C26H52NO7P	LysoPC 18:1	Lipids	LPC	-	1	down	down	20200000	17498000	20453000	4848200	4242700	4722000	9256400	8448500	7257000	2982700	3025000	4084900	--	--
Lmhp010190	C26H52NO7P	LysoPC 18:1(2n isomer)	Lipids	LPC	-	1	down	down	597330	512150	593530	127220	115110	128950	249810	218530	204620	82913	79592	108840	--	--
pmd0136	C26H54NO7P	LysoPC 18:0(2n isomer)	Lipids	LPC	-	1	down	down	1291700	1172700	1309600	338540	249610	380940	618770	732800	575530	140050	269490	394840	--	--
mws0126	C26H54NO7P	LysoPC 18:0	Lipids	LPC	19420-57-6	1	down	FALSE	7620600	6759900	7433500	2707300	2116300	3076700	3977200	4793800	3845000	1891900	2091600	3286300	--	--
pmp001259	C28H47NO8	5,8,11,14-Pentadecanoamide	Lipids	Free fatty acids	-	2	up	FALSE	32826	25480	28550	95403	57840	57655	79198	76560	105430	126310	129040	115270	--	--
Lmhp008924	C27H50NO7P	LysoPC 19:3	Lipids	LPC	-	2	down	FALSE	9537.9	8431	11423	609.84	408.27	1164.6	4538.4	6384	3027.9	2119.1	2083.9	4154	--	--
Lmbn001181	C22H28O15	Fraxetin-7,8-di-O-glucoside	Lignans and Coumarins	Coumarins	-	2	up	up	27179	37623	10023	234600	218690	206350	22651	23464	45577	132650	188730	207110	--	--
Lmhp007840	C27H52NO7P	LysoPC 19:2	Lipids	LPC	-	2	down	down	177990	172920	201750	54227	48953	51424	192770	147360	162070	57986	67857	98499	--	--
Lmdp004892	C24H22O14	Kaempferol-3-O-(6''-malonyl)glucoside	Flavonoids	Flavonols	-	1	down	FALSE	415450	327130	456350	175940	202940	211750	249080	206260	267890	139440	182670	225430	--	--
pmp000587	C24H22O14	Luteolin-7-O-(6''-malonyl)glucoside	Flavonoids	Flavonoid	-	1	down	FALSE	13887	19744	22284	8319.3	7129	5870.3	7982.5	7119.6	13036	12032	17415	19962	C10103	--
Lmhp010908	C27H54NO7P	LysoPC 19:1	Lipids	LPC	-	1	down	FALSE	255440	221870	244790	57843	58922	57210	106200	105340	85560	53198	50940	62571	--	--
Zmfn000481	C14H22N2O16P2	Uridine-5'-Diphosphate-D-Xylose	Nucleotides and derivatives	Nucleotides and derivatives	3616-06-6	3	down	down	258200	222950	265980	103660	68201	108290	252100	194150	218430	79523	73953	102530	C00190	ko00520,ko00908,ko01100
pmb2228	C27H56NO7P	LysoPC 19:0	Lipids	LPC	108273-88-7	1	down	FALSE	107420	92920	111390	19632	24122	16740	32113	20670	20910	14640	14403	25230	--	--
pmp001282	C28H50NO7P	Propyl 2-(trimethylammonio)ethyl phosphate	Others	Others	-	1	down	down	8813600	7405800	8660800	1869300	2134600	2669500	4216500	4163100	3737600	1770800	1765700	2284800	--	--
Lmhp009890	C28H52NO7P	LysoPC 20:3	Lipids	LPC	1199257-41-4	1	down	FALSE	483690	464660	470210	139820	131180	143670	272520	268590	290990	194000	183330	212760	--	--
pmd0147	C28H54NO7P	LysoPC 20:2	Lipids	LPC	-	3	down	FALSE	1803100	1858100	2063700	450300	334670	421660	815280	753020	900300	514660	504140	558280	--	--
pmd0146	C28H54NO7P	LysoPC 20:2(2n isomer)	Lipids	LPC	-	3	down	FALSE	1844700	1754100	2110800	440780	332440	449830	794860	792170	866980	515200	480090	571570	--	--
pmb0608	C25H24O14	Chrysoeriol-7-O-(6''-malonyl)glucoside	Flavonoids	Flavonoid	-	1	up	up	35802	51078	49379	141500	111860	62833	18469	17007	33804	39248	58664	46553	--	--
Lmhp011549	C28H56NO7P	LysoPC 20:1	Lipids	LPC	-	1	down	FALSE	1300200	1104200	1288500	328810	251990	296330	470880	373800	432180	263720	257420	351990	--	--
Hmln002189	C24H22O15	Quercetin-3-O-(6''-malonyl)galactoside	Flavonoids	Flavonols	-	1	FALSE	up	15664	2121	11833	14702	17777	16172	65991	37734	56836	102280	138910	150120	--	--
pmp000589	C24H22O15	Quercetin-7-O-(6''-malonyl)glucoside	Flavonoids	Flavonols	-	1	FALSE	up	33498	5076.8	19542	22604	31918	27017	123340	60100	87139	162760	212680	210200	--	--
pmb2979	C25H26O14	Hesperetin-7-O-(6''-malonyl)glucoside	Flavonoids	Dihydroflavone	-	2	down	FALSE	63563	51187	81597	33537	33018	28536	29057	28494	32576	25372	44724	45398	--	--
pmd0142	C28H58NO7P	LysoPC 20:0(2n isomer)	Lipids	LPC	-	3	down	FALSE	33015	31698	36972	12564	7590.8	10346	13806	15281	11099	7101.2	6828.5	10286	--	--
pmd0143	C28H58NO7P	LysoPC 20:0	Lipids	LPC	108341-80-6	3	down	FALSE	82541	93928	93597	26860	19644	25671	27789	35080	25502	19212	18269	22622	--	--
Lmmn002260	C27H36O12	5'-Methoxyisolariciresinol-9'-O-glucoside	Lignans and Coumarins	Lignans	-	2	down	down	98124	103750	73515	34175	31183	31234	293790	289550	213660	46402	65665	59194	--	--
pmb2922	C15H24N2O17P2	Uridine 5'-diphospho-D-glucose	Nucleotides and derivatives	Nucleotides and derivatives	133-89-1	1	down	down	1251600	1068000	1088800	426750	311820	335740	1261200	926110	1087100	312520	367650	490480	C00029	ko00040,ko00052,ko00053,ko00240,ko00500,ko00520,ko00561,ko00908,ko01100,ko01110
pme0430	C30H24O12	Procyanidin A1	Tannins	Proanthocyanidins	103883-03-0	3	up	FALSE	1189	597	596	5216.2	5299.2	2321	2968.8	2960	2359.2	5957.2	618.25	4656	--	--
pme0432	C30H24O12	Procyanidin A2	Tannins	Proanthocyanidins	41743-41-3	3	up	FALSE	20772	30574	11718	81626	75973	89116	109360	98128	175300	155060	210730	193820	C10237	--
Lmpp003930	C30H26O12	Apigenin-7-O-(6''-p-Coumaryl)glucoside	Flavonoids	Flavonoid	-	3	FALSE	up	21191	21409	24844	3850.5	13542	46335	1988.2	10108	6126.2	13784	14536	18485	--	--
pme0368	C27H30O14	Apigenin-7-O-rutinoside (Isorhoifolin)	Flavonoids	Flavonoid	552-57-8	3	down	FALSE	26222	27627	30686	12875	7335.5	21963	4426.2	7847.8	9	14023	10058	15056	--	--
mws0047	C27H30O14	Apigenin-7-O-neohesperidoside (Rhoifolin)	Flavonoids	Flavonoid	17306-46-6	3	FALSE	up	13745	6602.6	5858.8	537.77	12052	33259	7467.1	7357.5	11841	14946	23428	59862	C12627	ko00944
mws1409	C15H22N2O18P2	Uridine-5'-diphosphoglucuronic acid	Nucleotides and derivatives	Nucleotides and derivatives	-	3	down	down	38038	41134	58160	10702	5113.5	8446	36665	35464	34562	10560	8694.2	12782	--	--
HJAP148	C26H28O15	Kaempferol-3-O-sambubioside	Flavonoids	Flavonols	27661-51-4	1	up	FALSE	9352700	13848000	13361000	24691000	30483000	25369000	1947900	2054100	1485000	1738800	1765700	1457900	--	--
MWSHY0056	C27H32O14	Naringenin-7-O-Rutinoside(Narirutin)	Flavonoids	Dihydroflavone	14259-46-2	2	up	up	10165	8660.2	7360	74778	94179	188600	19698	22107	30921	101750	145180	250410	C09793	--
pmb4486	C29H40N8O5	Hordatine B	Alkaloids	Phenolamine	10502-21-3	2	up	up	64371	48821	58804	239410	195770	248610	48371	52232	67087	189010	256310	197160	C08308	--
Xmzn007677	C33H35N5O5	Ergotamine	Alkaloids	Plumerane	113-15-5	3	down	down	22020000	18217000	21292000	5239800	5621800	5900900	9736800	9139500	8580000	3851300	3754000	4725200	C07544	ko01110
pmb0492	C34H37N3O6	N',N'',N'''-p-Coumaroyl-cinnamoyl-caffeoyl spermidine	Alkaloids	Phenolamine	-	3	up	up	284960	378900	418880	1586900	1505400	1219300	295290	399200	383320	1204600	787250	745100	--	--
Hmgp003641	C28H32O14	Chrysoeriol-6-C-rhamnoside-7-O-rhamnoside	Flavonoids	Flavonoid carbonoside	-	2	up	up	16374	6889.7	5184.7	25655	26448	38901	39066	33284	50875	140460	106790	79732	--	--
pmp001288	C28H32O14	Acacetin-7-O-rutinoside (Linarin)	Flavonoids	Flavonoid	480-36-4	1	up	up	368570	233260	196350	789870	1040900	1247000	1638700	1351800	2115800	6195900	4551700	3058000	--	--
pmp000593	C27H30O15	Luteolin-7-O-rutinoside	Flavonoids	Flavonoid	3563-98-2	1	up	up	743980	399040	235440	1591000	2099000	1784300	296260	294080	435530	769770	824320	528900	--	--
Lmtp004044	C26H28O16	Quercetin-3-O-apiosyl(1→2)galactoside*	Flavonoids	Flavonols	-	1	FALSE	up	3373000	508180	295070	2690600	3986600	5821800	8873600	7876700	8252200	15732000	16184000	19020000	--	--
Lmqn000780	C17H27N3O17P2	Uridine 5'-diphospho-N-acetylglucosamine	Nucleotides and derivatives	Nucleotides and derivatives	528-04-1	3	down	down	41146	23959	32175	10769	9629.7	10563	38719	22182	19838	7976.9	5097	10945	C00043	ko00520,ko01100
Hmjp003008	C27H28O16	Luteolin-7-O-glucuronide-5-O-rhamnoside	Flavonoids	Flavonoid	-	1	up	up	8446300	6934800	7573900	19311000	19026000	14955000	5064600	4402800	6371400	10816000	18073000	16701000	--	--
Lmbp002336	C27H30O16	Quercetin-3-O-(2''-O-rhamnosyl)galactoside	Flavonoids	Flavonols	-	2	up	FALSE	201900	202960	173350	523470	320580	394290	196420	262790	161640	158610	188680	203890	--	--
MWS0132	C20H32N6O12S2	Oxiglutatione	Amino acids and derivatives	Amino acids and derivatives	27025-41-8	1	FALSE	down	1847600	1753100	1662200	1783900	1535700	1528500	2395100	1791600	2240700	819540	1008100	1117100	C00127	ko00480,ko01100
Rfmb26201	C30H38O14	Syringaresinol-4'-O-(6''-acetyl)glucoside	Lignans and Coumarins	Lignans	-	3	up	up	6240.2	7968.4	8414.2	75854	67455	41723	7715.5	10409	33549	53946	60656	62953	--	--
HJAP120	C28H32O16	Rhamnetin-3-O-Rutinoside	Flavonoids	Flavonols	-	2	FALSE	up	162620	54178	30112	139060	177690	323380	79705	1097400	1610600	3594100	6203900	6559500	--	--
Zmxp002867	C28H32O16	Chrysoeriol-5,7-di-O-glucoside	Flavonoids	Flavonoid	-	3	down	FALSE	79566	108250	99255	49758	54864	14486	6828.8	16193	7810.2	8196	2100	6843	--	--
Lmmp002963	C28H32O16	6-C-Methylquercetin-3-O-rutinoside	Flavonoids	Flavonols	-	1	FALSE	up	122690	81611	93397	109590	151170	309310	561650	430660	1295700	1465800	5071700	8892400	--	--
MWSHY0064	C28H32O16	Isorhamnetin-3-O-neohespeidoside	Flavonoids	Flavonols	55033-90-4	2	up	up	47540	44114	40802	131270	148650	330950	1232900	1079800	1457700	3545100	6171300	5649200	--	--
MWSHY0135	C28H32O16	Isorhamnetin-3-O-rutinoside (Narcissin)	Flavonoids	Flavonols	604-80-8	2	up	up	137800	52320	38555	153310	201930	371990	1407600	1050600	1557300	3572300	6803700	6132000	--	--
pmp001311	C27H30O17	6-Hydroxykaempferol-7,6-O-Diglucoside	Flavonoids	Flavonols	-	1	up	up	16865	7693.4	1502.3	27943	48777	99018	287080	172670	402300	665220	594440	534960	--	--
pmb0618	C28H34O16	Hesperetin-8-C-glucoside-3'-O-glucoside	Flavonoids	Flavonoid carbonoside	-	2	up	up	2665.5	1719.5	1716.8	10277	21026	7719	99766	73509	129700	257920	219920	212860	--	--
Hmlp002975	C28H30O17	Isorhamnetin-3-O-glucuronide-7-O-rhamnoside	Flavonoids	Flavonols	-	3	up	up	13328	2288.8	3534	10406	26435	34450	54360	61031	129560	249910	328200	373140	--	--
Lmmp002560	C27H28O18	Quercetin-3-O-(2''-O-glucosyl)glucuronide	Flavonoids	Flavonols	-	3	FALSE	up	30645	4738.2	3078.8	9048.3	28985	51417	79475	102140	164300	288560	306440	269530	--	--
Hmcp001578	C28H32O17	Isorhamnetin-3,7-O-diglucoside	Flavonoids	Flavonols	6758-51-6	3	FALSE	up	3787.2	2236.5	2251.1	3213.6	1862.9	25512	38809	30434	46670	85099	115830	83147	--	--
Lmsp003252	C28H32O17	Isorhamnetin-3-O-sophoroside	Flavonoids	Flavonols	-	2	FALSE	up	9239.9	745.6	1762	1776.5	2735.8	29134	63849	45763	73086	175490	175990	147260	--	--
mws1506	C29H36O16	Plantamajoside	Phenolic acids	Phenolic acids	104777-68-6	1	up	FALSE	17741	17735	19887	43762	32036	46665	38965	41700	37758	28584	31636	40362	C10485	--
pmb0530	C21H27N7O14P2	Nicotinic acid adenine dinucleotide	Nucleotides and derivatives	Nucleotides and derivatives	53-84-9	1	down	down	895280	896110	1049200	448130	352110	453600	828050	904190	987120	376270	453800	480450	C00003	ko00190,ko00730,ko00760,ko01100
Hmqp003184	C29H30O18	Luteolin-7-O-(6''-malonyl)glucoside-5-O-arabinoside	Flavonoids	Flavonoid	-	3	FALSE	down	218210	168670	166970	187370	171850	199670	84231	134590	100430	28396	41366	44016	--	--
Lmhp009190	C33H58O14	2-Linoleoylglycerol-1,3-di-O-glucoside	Lipids	Glycerol ester	-	1	up	FALSE	22458	24494	29830	58792	57217	108310	33764	48075	61069	86113	98078	69787	--	--
Zmlp003063	C33H40O19	Luteolin-7-O-(2''-O-rhamnosyl)rutinoside	Flavonoids	Flavonoid	-	2	up	FALSE	513810	651670	608020	1240800	1185400	1148400	82231	66120	88084	127330	111000	101880	--	--
mws1035	C33H40O19	Kaempferol-3-O-robinoside-7-O-rhamnoside (Robinin)	Flavonoids	Flavonols	301-19-9	2	up	FALSE	444020	498940	502940	1201500	1120100	1092500	63597	52508	79084	114240	108090	102900	C10178	--
HJAP061	C32H38O20	Quercetin-3-O-(2''-O-arabinosyl)rutinoside	Flavonoids	Flavonols	-	1	FALSE	up	876000	56083	46681	469070	339470	1477400	1837600	1367000	1401500	2468200	3612100	4147800	--	--
Hmqp002870	C32H38O20	Luteolin-7-O-Sophoroside-5-O-arabinoside	Flavonoids	Flavonoid	-	2	up	FALSE	1053500	1079900	1178700	2586800	2745100	2882700	104180	107250	141680	201680	169530	207220	--	--
pme2651	C21H28N7O17P3	NADP (Nicotinamide adenine dinucleotide phosphate)	Nucleotides and derivatives	Nucleotides and derivatives	53-59-8	3	down	down	991220	809940	789780	123540	67333	167180	923370	1090200	744580	63150	86857	105280	C00006	ko00195,ko00480,ko00760,ko01100
pmp001105	C33H40O20	Kaempferol-3-O-neohesperidoside-7-O-glucoside	Flavonoids	Flavonols	-	3	FALSE	up	8399.7	9171.8	17616	4746.1	4484.4	22671	73092	85407	65944	189440	233620	187580	--	--
pmb0639	C33H40O20	Apigenin-8-C-glucoside-7-O-Sophoroside	Flavonoids	Flavonoid carbonoside	-	3	FALSE	up	2828.8	2218.6	1421.4	699.26	2688.7	2552	17112	19897	13924	47916	61809	41801	--	--
Hmcp001559	C33H40O20	Isorhamnetin-3-O-rutinoside-7-O-arabinoside	Flavonoids	Flavonols	-	3	FALSE	up	1226.7	1221.3	306.05	614.14	455.06	607.66	7680.3	8581.6	2410.8	18770	12069	12212	--	--
pmn001505	C41H64O13	Oleanolic acid-3-O-xylosyl(1→3)glucuronide	Terpenoids	Triterpene Saponin	-	2	FALSE	up	170190	293020	253700	253830	241140	290930	340490	215790	148000	297590	726490	833800	--	--
HJAP128	C34H42O20	Isorhamnetin-3-O-rutinoside-7-O-rhamnoside	Flavonoids	Flavonols	-	1	up	FALSE	201590	58196	38830	246110	329710	443710	466090	545850	430410	504020	903820	1446900	--	--
Lmsp002982	C33H40O21	Quercetin-3-O-sophoroside-7-O-rhamnoside	Flavonoids	Flavonols	-	2	up	FALSE	18087	3417.5	736.82	17812	37818	61675	73813	54833	64313	111780	124330	143460	--	--
Hmmp006067	C42H68O13	Oleanolic acid-3-O-glucosyl(1→2)glucoside	Terpenoids	Triterpene Saponin	-	2	FALSE	up	9	9	1987.4	1576	1058.5	3342.6	1757.5	1665.4	993.51	13089	19434	20560	--	--
Hmcp001589	C34H42O21	Isorhamnetin-3-O-rutinoside-4'-O-glucoside	Flavonoids	Flavonols	111393-97-6	3	FALSE	up	1668.9	1549.1	308.37	1224	931.64	10288	36332	31997	31407	104250	464490	862180	--	--
Lmhp003162	C34H42O21	Chrysoeriol-6,8-di-C-glucoside-4'-O-glucoside	Flavonoids	Flavonoid carbonoside	-	3	down	FALSE	5299.7	3328.3	4627.4	2141	2562.5	529.82	11973	19871	7213.2	19251	26727	11544	--	--
Lmwp005248	C42H46O22	Kaempferol-3-O-(6'''-p-Coumaroyl)glucosyl-(1→2)-Glucoside-7-O-Rhamnoside	Flavonoids	Flavonols	-	2	FALSE	up	63083	109820	124170	113880	85706	102700	285.19	288.86	213.1	714.21	434.93	1798.3	--	--
HJAP136	C39H50O25	Quercetin-3-O-(2''-O-rhamnosyl)rutinoside-7-O-glucoside	Flavonoids	Flavonols	-	3	up	FALSE	499.66	255.97	242.96	1239.8	746.9	1234.7	5541.3	3266.9	4794.2	2235.4	4225.3	11131	--	--
HJAP123	C40H52O25	Isorhamnetin-3-O-rutinoside-7-O-rutinoside	Flavonoids	Flavonols	-	3	FALSE	up	3897.3	4607.1	301.71	5096.4	11998	35042	24383	26105	32451	55694	64161	59307	--	--
MWS20196	C41H30O27	Chebulagic acid	Tannins	Tannin	23094-71-5	2	up	up	131850	55823	18000	198580	1400000	1190400	1915900	1375200	2401600	4884500	4420300	4081300	C10214	--
