# Supplementary material for: Transcriptome and Metabolome Analyses Revealed the Response Mechanism of Quinoa Seedlings to Different Phosphorus Stresses
Source: Int J Mol Sci. 2022 Apr 24;23(9):4704. doi: 10.3390/ijms23094704 (PMC9105174; doi:10.3390/ijms23094704)
Supplement: Supplementary file 1 [file ijms-23-04704-s001.zip › Table.S2.xlsx]

## Sheet: Sheet1
Table S2. Number and classification of the detected metabolites are shown for CK vs. HP.
Index	Formula	Compounds	Class I	Class II	CAS	Level	W2_vs_W5	R2_vs_R5	W2-1	W2-2	W2-3	W5-1	W5-2	W5-3	R2-1	R2-2	R2-3	R5-1	R5-2	R5-3	cpd_ID	kegg_map
Lmlp001319	C4H10O2	2,3-Butanediol	Others	Saccharides and Alcohols	513-85-9	3	up	FALSE	9991.5	16120	24243	105000	156060	91795	226720	139320	148320	211420	167020	196270	C03044	ko00650
pmf0256	C6H14O	3-Methyl-1-pentanol	Others	Saccharides and Alcohols	589-35-5	3	up	FALSE	716060	891110	860270	2188900	1800700	2057100	762710	983740	1545900	1542700	1137100	1743900	--	--
pme3011	C4H9NO2	γ-Aminobutyric acid	Organic acids	Organic acids	56-12-2	2	FALSE	up	352420	334420	481380	425540	435880	702400	476630	349270	407430	1027800	843160	760970	C00334	ko00250,ko00330,ko00410,ko00650,ko00760,ko01100
mws1358	C6H6O2	Pyrocatechol	Phenolic acids	Phenolic acids	120-80-9	2	FALSE	down	6599.5	25318	11324	10338	9935.4	14128	10857	4257.1	5170.6	4221.1	944.59	2826.9	C00090	ko01100
MWSmce118	C5H6N2O2	Imidazole-4-Acetic Acid*	Organic acids	Organic acids	645-65-8	2	up	FALSE	50435	32278	64065	176940	79742	152470	88776	139190	83946	132800	146710	125860	C02835	ko00340,ko01100
mws0704	C2H8NO4P	O-Phosphorylethanolamine	Alkaloids	Alkaloids	1071-23-4	3	FALSE	up	32163	25812	30910	53848	43869	53428	46965	41760	28216	139830	102840	119070	C00346	ko00564,ko00600,ko01100
MWS0559	C6H10O5	1,6-anhydro-β-D-glucose	Others	Saccharides and Alcohols	498-07-7	3	FALSE	down	13833	35554	52523	111730	18296	23768	12463	34268	26322	9440.8	12330	7649.5	--	--
pme2529	C6H12O5	1,5-Anhydro-D-glucitol	Others	Saccharides and Alcohols	154-58-5	3	FALSE	down	87018	116880	72218	82024	102250	95918	193610	138360	238870	70613	87609	117030	C07326	--
Lmrn003000	C9H10O3	2-Hydroxy-3-phenylpropanoic acid	Phenolic acids	Phenolic acids	7326-19-4	1	up	FALSE	2380.2	5306.2	3522.2	15291	6046	7009.8	128830	93158	90552	95584	77871	109400	C05607	ko00360,ko00960,ko01100
mws2125	C3H5O6P	Phosphoenolpyruvate	Organic acids	Organic acids	138-08-9	3	FALSE	up	188070	71850	63352	238850	179690	115640	527000	459690	186010	966250	1259800	1581200	C00074	ko00010,ko00020,ko00400,ko00440,ko00620,ko00710,ko00998,ko01100,ko01110,ko01200,ko01230
pme1292	C8H8O4	Homogentisic acid	Phenolic acids	Phenolic acids	451-13-8	3	FALSE	down	208940	207400	185240	73931	156830	202890	294900	115460	61423	31576	19521	57825	C00544	ko00130,ko00350,ko01100
pme3009	C6H6O6	Trans-Citridic acid	Organic acids	Organic acids	4023-65-8	2	FALSE	down	548970	553690	579700	514720	573730	637820	726220	220540	397500	142760	237090	150260	C02341	ko00660,ko01100
pme2024	C10H12N2O	Serotonin*	Alkaloids	Plumerane	50-67-9	1	FALSE	down	2109300	3062200	2604400	2012900	1713800	2069500	3176700	2302300	3585200	1524000	960290	1117500	C00780	ko00380,ko01100
pmb0774	C10H12N2O	N-Hydroxytryptamine*	Alkaloids	Plumerane	-	1	FALSE	down	1958000	2852500	2371300	1790300	1549100	1984800	3029800	2116700	3026500	1507700	885830	980590	C17203	ko00380,ko01100
pmb0468	C6H11NO3S	N-Formyl-L-Methionine	Amino acids and derivatives	Amino acids and derivatives	4289-98-9	3	FALSE	down	43107	59776	52632	41619	29726	44307	76178	50565	80768	31152	26386	21241	C03145	ko00270
mws0663	C7H8N4O2	1,7-Dimethylxanthine	Nucleotides and derivatives	Nucleotides and derivatives	611-59-6	3	up	FALSE	453.9	5428.8	1347.8	14105	12597	11359	16226	12032	15226	15322	9903.9	17386	C13747	ko00232,ko01100,ko01110
MWS2070	C10H12O3	Propyl 4-hydroxybenzoate	Phenolic acids	Phenolic acids	94-13-3	3	up	FALSE	6418.9	9533.5	10512	114440	132180	118100	185970	152560	117320	129250	102160	165390	--	--
Zmgn000447	C3H7O7P	3-Phospho-D-glyceric acid	Others	Saccharides and Alcohols	820-11-1	3	FALSE	up	512410	232530	200130	639550	486870	345120	1705900	1397300	684650	2390300	3198100	3334400	C00197	ko00010,ko00030,ko00260,ko00270,ko00561,ko00630,ko00710,ko01100,ko01110,ko01200,ko01230
pme2993	C10H8O4	Scopoletin (7-Hydroxy-5-methoxycoumarin)	Lignans and Coumarins	Coumarins	92-61-5	3	FALSE	down	18428	46869	63997	39008	65291	46030	79849	108780	219030	53832	19495	58689	C01752	ko00940,ko01110
Lmdn003756	C10H10O4	Methyl caffeate	Phenolic acids	Phenolic acids	3843-74-1	3	up	FALSE	3238.8	8595	11852	12518	13220	22765	19292	18245	14362	22412	12687	16045	C10477	--
pme3827	C9H11NO4	3,4-Dihydroxy-L-phenylalanine (L-Dopa)	Amino acids and derivatives	Amino acids and derivatives	59-92-7	1	FALSE	down	31582	23638	10955	17284	4978.1	16385	41286	39278	93055	21657	34147	22414	C00355	ko00350,ko00950,ko00965,ko01100,ko01110
Zmzn000079	C4H9O7P	D-Erythrose-4-phosphate	Others	Saccharides and Alcohols	585-18-2	3	FALSE	up	95303	76122	92665	106160	118060	118660	75913	77167	55369	144680	167150	151800	C00279	ko00030,ko00400,ko00710,ko00750,ko00998,ko01100,ko01110,ko01200,ko01230
pmb0130	C12H14N2O	Acetryptine	Alkaloids	Plumerane	3551-18-6	3	FALSE	down	13200	20307	18351	28610	22255	16067	17674	19699	66752	13530	5940.4	14438	--	--
pme0266	C10H18O4	Sebacate	Organic acids	Organic acids	111-20-6	1	up	FALSE	2053	3693.9	1678.6	31845	29039	23920	63491	37803	38165	30880	30715	47568	C08277	--
pme1675	C4H10N3O5P	Creatine Phosphate	Organic acids	Organic acids	67-07-2	3	down	FALSE	18074	11651	12003	6242.4	5065.9	7749.9	6870.1	14142	8571.9	14605	17617	20941	C02305	ko00330,ko01100
mws0863	C5H11O7P	2-Deoxyribose-5'-phosphate	Nucleotides and derivatives	Nucleotides and derivatives	102916-66-5	3	FALSE	up	11989	12417	14555	20973	20271	18320	10262	17931	12514	25056	38525	30004	C00673	ko00030,ko01100
pmb2507	C5H11O7P	2-Deoxyribose-1-phosphate	Nucleotides and derivatives	Nucleotides and derivatives	17210-42-3	3	FALSE	up	155620	116480	134610	168510	207190	286810	125600	200750	162030	483630	752870	363320	C00672	ko00030,ko00240,ko01100
mws0520	C11H13NO4	N-Acetyl-L-tyrosine	Amino acids and derivatives	Amino acids and derivatives	537-55-3	3	FALSE	down	189320	278970	195180	163620	206410	215580	249690	368890	416830	152620	172790	132770	--	--
MWStz205	C14H16N2O2	Cyclo(D-Phe-L-Pro)	Amino acids and derivatives	Amino acids and derivatives	26488-24-4	3	up	FALSE	3088.8	1765.7	3134	5303.4	3522.2	7480.1	11881	3993	10110	8373.2	5257.8	16334	--	--
Hmbp003234	C12H14O6	1-O-Caffeoylglycerol	Lipids	Glycerol ester	-	3	FALSE	down	18914	18949	26346	24994	11870	42487	51264	56154	71105	9328.6	39172	24872	--	--
Zmdn006929	C15H12O4	Aloe-Emodin-9-Anthrone	Quinones	Anthraquinone	6247-99-0	2	up	FALSE	33467	50809	37374	197340	92427	42669	210170	39493	28225	29749	401720	29256	C16760	--
MWSHY0124	C15H12O4	Pinocembrin (Dihydrochrysin)	Flavonoids	Dihydroflavone	480-39-7	1	up	FALSE	55116	94801	64498	368500	175690	82666	430490	75028	47415	56105	713250	52563	C09827	ko00941
mws0120	C8H20NO6P	Choline Alfoscerate	Lipids	PC	28319-77-9	1	FALSE	up	95297	110970	171750	114690	277600	178360	32872	11879	13860	185030	188240	173190	C00670	ko00564,ko00565
Zmyn000110	C6H14NO8P	D-Glucosamine 1-phosphate	Others	Saccharides and Alcohols	2152-75-2	3	FALSE	up	27641	14529	13178	12115	34084	29853	6039.6	7813	3011.6	42863	42153	32696	C06156	ko00520,ko01100
mws1090	C6H13O9P	Glucose-1-phosphate*	Others	Saccharides and Alcohols	59-56-3	1	FALSE	up	2469700	1620000	1707600	2657500	1771600	2911800	2909400	3012800	1805500	4688500	6814700	6168300	C00103	ko00010,ko00040,ko00052,ko00500,ko00520,ko00523,ko00561,ko01100,ko01110
mws0866	C6H13O9P	D-Glucose 6-phosphate*	Others	Saccharides and Alcohols	56-73-5	1	FALSE	up	2680700	1542300	1516200	2818600	2130600	2932800	2956900	3062300	1787300	5284600	6847300	6450800	C00092	ko00500,ko00562,ko00998,ko01100,ko01110
MWS2442	C6H13O9P	D-Fructose 6-Phosphate	Others	Saccharides and Alcohols	643-13-0	1	FALSE	up	1499700	950860	1000200	1653700	1347300	1715900	1677900	1738200	1097400	3027700	4035900	3569700	C00085	ko00052,ko00500,ko00710,ko01100,ko01110,ko01200
pma2172	C17H17NO2	Cinnamoyltyramine	Alkaloids	Phenolamine	20384-14-9	3	up	FALSE	558.9	9027.2	826.63	17431	7699	10634	6203.4	4558.4	66103	52134	6804.5	12025	--	--
pmp000086	C13H16O6	1-Feruloyl-sn-glycerol	Phenolic acids	Phenolic acids	-	2	FALSE	down	1598100	2265600	2295800	2865700	2565500	2675300	5303800	7187000	11211000	3773300	4375200	3440500	--	--
mws1175	C16H14O4	Pinostrobin	Flavonoids	Dihydroflavone	480-37-5	3	up	FALSE	73656	74763	42506	261730	153620	65337	540540	68241	48633	47347	571310	43269	C16419	ko00941
Hmqp002567	C17H17NO3	P-Hydroxycinnamic acid p-hydroxyphenethylamine	Phenolic acids	Phenolic acids	-	1	up	FALSE	9352	17307	11455	29647	32450	116800	23520	58989	684300	556330	22536	44283	--	--
MWSmce089	C17H17NO3	p-Coumaroyltyramine	Lignans and Coumarins	Coumarins	36417-86-4	1	up	FALSE	10920	20298	7461.9	28757	29088	101620	18808	55011	701430	542950	20231	45135	--	--
Zmwp005562	C17H17NO3	cis-N-p-Coumaroyltyramine	Alkaloids	Phenolamine	-	1	up	FALSE	7508.7	19351	14266	27294	30129	109590	20241	53888	643100	535170	20382	35441	--	--
mws0129	C16H12O5	Genkwanin (Apigenin 7-methyl ether)	Flavonoids	Flavonoid	437-64-9	1	FALSE	up	6647.2	4229.1	1747.4	6167.7	5597.1	3614.3	3436.5	854.22	4313.7	6437.3	13861	3756.4	C10046	--
mws1436	C18H38O2	1,18-Octadecanediol	Lipids	Free fatty acids	3155-43-9	2	up	FALSE	6085.7	7112.8	5243.4	72807	66297	54928	93349	51232	75767	55468	47993	98758	--	--
pme3163	C7H15O10P	D-Sedoheptuiose 7-phosphate	Others	Saccharides and Alcohols	2646-35-7	3	FALSE	up	818570	621740	722300	1128600	850670	1073700	452060	584030	726500	1342300	1843100	1382300	--	--
pmb2657	C10H18N4O6	Argininosuccinic acid	Organic acids	Organic acids	2387-71-5	3	FALSE	up	219320	133680	179580	323680	247850	227100	149750	151730	92321	378590	348290	360880	C03406	ko00220,ko00250,ko01100,ko01110,ko01230
Zmyn004548	C18H28O3	12-Oxo-phytodienoic acid	Lipids	Free fatty acids	85551-10-6	1	up	FALSE	10774	9379.7	11880	17387	18135	30964	6265.2	11802	8489.2	9071.1	13168	9584.6	C01226	ko00592,ko01100,ko01110
mws0920	C15H10O7	Tricetin (5,7,3',4',5'-Pentahydroxyflavone)	Flavonoids	Flavonoid	520-31-0	2	FALSE	up	35211	3323.2	2760.3	33472	65761	1918	821.21	647.28	3118.9	2684.4	5991.9	6467.2	C10192	ko00941
pmn001610	C20H36O2	Eicosadienoic acid	Lipids	Free fatty acids	5598-38-9	1	up	up	19871	22688	11551	35091	34381	45714	65185	59502	48110	116590	90322	149310	C16525	ko01040
pmf0397	C20H40O2	Arachidic acid	Lipids	Free fatty acids	506-30-9	3	FALSE	up	22945	23316	18251	21008	13715	18327	8586.9	3958.4	10592	19294	16237	22716	C06425	ko01040
mws1174	C17H14O6	3-O-Acetylpinobanksin	Flavonoids	Dihydroflavonol	52117-69-8	1	up	FALSE	156390	228120	170220	845300	484160	291380	1287900	210980	114970	135050	1992600	168730	C16418	ko00941
Lmbn005822	C18H34O4	9,10-DHOME; (12Z)-9,10-Dihydroxyoctadec-12-enoic acid	Lipids	Free fatty acids	263399-34-4	3	down	FALSE	628.56	1140.5	1275.5	171.78	268.51	734.87	484.36	652.82	473.93	417.57	189.49	1005.5	C14828	ko00591
Lmfp001509	C13H16O9	1-O-Galloyl-rhamnose	Tannins	Tannin	-	3	FALSE	up	13112	9190.9	2036.7	10118	8069.9	10166	29799	34199	33254	52812	86344	59421	--	--
pme3188	C9H13N2O9P	Uridine 5'-monophosphate	Nucleotides and derivatives	Nucleotides and derivatives	58-97-9	1	FALSE	down	849270	2667600	2229900	1330400	1009600	1317200	1213100	2471000	3646000	493510	272910	321340	C00105	ko00240,ko01100
Lmqn000351	C12H22O10	Rutinose	Others	Saccharides and Alcohols	90-74-4	3	FALSE	down	106210	208770	159350	134080	113730	76308	148120	117190	129080	61738	38312	58778	C08247	--
mws1080	C12H22O11	Galactinol	Others	Saccharides and Alcohols	3687-64-7	1	up	FALSE	468160	453650	376780	1595900	707330	656350	984430	637810	883980	480410	887600	954440	C01235	ko00052,ko01100
mws0609	C10H12N5O7P	Guanosine 3',5'-cyclic monophosphate	Nucleotides and derivatives	Nucleotides and derivatives	7665-99-8	1	FALSE	down	740270	2295300	1996000	2080400	1943600	1586800	1388200	1217800	3762200	505500	291150	615000	C00942	ko00230,ko01100
pmb0981	C10H14N5O7P	Adenosine 5'-monophosphate	Nucleotides and derivatives	Nucleotides and derivatives	61-19-8	1	FALSE	up	15184000	12835000	13697000	14018000	15602000	11041000	7594000	5416400	5380400	11401000	16106000	11298000	C00020	ko00230,ko00908,ko01100,ko01110
pmb0532	C10H13N4O8P	Inosine 5'-monophosphate	Nucleotides and derivatives	Nucleotides and derivatives	131-99-7	3	FALSE	up	1189900	950420	1125100	1207800	1516500	983630	611290	426210	409480	1016800	1344500	868500	C00130	ko00230,ko01100,ko01110
pme1816	C16H18O9	Neochlorogenic acid (5-O-Caffeoylquinic acid)*	Phenolic acids	Phenolic acids	906-33-2	1	up	FALSE	30406	12744	327020	744780	659690	564080	1493300	1552100	1762200	1775600	1654500	2216200	C17147	--
mws0178	C16H18O9	Chlorogenic acid (3-O-Caffeoylquinic acid)*	Phenolic acids	Phenolic acids	327-97-9	1	up	FALSE	16499	19552	342120	717180	741010	639300	1974100	1568200	1959800	2052300	2107300	2129200	C00852	ko00940,ko00941,ko00945,ko01110
mws2108	C16H18O9	Cryptochlorogenic acid (4-O-Caffeoylquinic acid)	Phenolic acids	Phenolic acids	905-99-7	2	up	FALSE	17255	21430	269970	498880	409950	451310	1253800	1241100	1186900	1344700	1304300	1647500	--	--
pmb0998	C10H14N5O8P	Guanosine 5'-monophosphate	Nucleotides and derivatives	Nucleotides and derivatives	85-32-5	2	FALSE	up	657620	414620	394320	585800	619230	449770	295970	228420	189370	724640	1022800	639050	C00144	ko00230,ko01100
mws5040	C12H21O11Na	Turanose	Others	Saccharides and Alcohols	547-25-1	1	up	FALSE	45033	92113	68099	213190	114410	226960	102960	75186	110580	73495	117140	201790	C19636	--
pmn001695	C16H20O10	Trihydroxycinnamoylquinic acid	Phenolic acids	Phenolic acids	-	2	FALSE	down	72240	109980	105860	68212	72614	86419	102010	88475	145650	54796	50541	43880	--	--
mws2523	C12H23O14P	Trehalose 6-phosphate	Others	Saccharides and Alcohols	4484-88-2	1	FALSE	up	6362.2	4041.9	4920.7	5081.2	3878.4	8200.4	2771.6	8113.7	3096.4	9271.5	14050	10404	C00689	ko00500,ko01100,ko01110
pmp000117	C22H24O9	3,5,6,7,8,3',4'-Heptamethoxyflavone	Flavonoids	Flavonols	1178-24-1	2	up	FALSE	743.5	2139.4	1841.1	5637.7	5558.7	5158.2	6244	5702.8	5156.8	4474.2	6373	5743.3	--	--
pmb0862	C20H42NO7P	LysoPC 12:0	Lipids	LPC	20559-18-6	3	up	FALSE	6914.4	11531	14713	29094	61095	46179	37082	32919	34732	28772	31039	41003	--	--
Lmhp008885	C20H42NO7P	LysoPE 15:0(2n isomer)	Lipids	LPE	-	1	FALSE	up	112470	89457	105640	130310	167700	214720	31463	30232	27728	57486	78410	56718	--	--
Lmjp004533	C22H22O10	Kisasagenol A Triacetate	Terpenoids	Terpene	-	1	FALSE	down	100220	187650	150750	111810	105540	146590	28509	24532	42449	14040	11936	8517.1	--	--
pmn001700	C30H48O3	24,30-Dihydroxy-12(13)-enolupinol	Terpenoids	Triterpene	-	1	FALSE	up	22806	17643	31011	17004	42617	55138	24314	25111	15697	38617	52027	40195	--	--
HJN110	C30H48O3	Betulinic acid	Terpenoids	Triterpene	472-15-1	3	up	FALSE	699.53	499.85	175.98	1645.4	1001	755.58	1154.8	1112.5	401.2	378.72	1715.9	174.76	C08619	--
pmn001706	C30H48O4	2-Hydroxyoleanolic acid	Terpenoids	Triterpene	26707-60-8	2	up	FALSE	6317.9	8506.8	2213.4	15975	15472	8213.2	12462	73646	1250.3	16815	6206.8	47838	--	--
Smpn011792	C30H48O4	2,3-dihydroxy-12-ursen-28-oic acid	Terpenoids	Triterpene	-	3	up	FALSE	997.15	1275	10297	15620	4952.2	7799.4	7233	7194.9	4330.5	5987	4653.1	5457.8	--	--
Lmsn003409	C22H22O12	1-O-Galloyl-6-O-p-Coumaroyl-β-D-glucose	Phenolic acids	Phenolic acids	-	3	FALSE	down	14105	11359	10058	7795.7	14182	4994.1	5065.7	1355.7	893.76	906.98	891.02	453.95	--	--
mws1454	C23H26O11	Persicoside	Flavonoids	Dihydroflavone	28978-03-2	2	up	FALSE	1219.5	1307.8	551.41	1514	1579.6	3499.3	18860	12810	34613	34302	30300	19111	--	--
pmp000444	C30H46O5	27,28-Dicarboxyl ursolic acid	Terpenoids	Triterpene	-	3	FALSE	up	16934	17707	19199	13653	13823	21477	8474.9	13333	10431	19028	27558	19320	--	--
pmn001342	C23H20O12	Rhein-8-O-(6'-O-acetyl)glucoside	Quinones	Anthraquinone	-	2	up	FALSE	1987	2510.2	17341	16653	7827.2	20218	7203.2	2379.2	15715	9360.5	3644.8	4361.2	--	--
Smpn009230	C30H48O5	2α,3α,23-trihydroxyolean-12-en-28-oic acid	Terpenoids	Triterpene	-	3	down	FALSE	14226	14101	11421	5693.5	5239.7	7022	4852	9917.5	5414.4	15651	15853	5560.6	--	--
Hmln002199	C23H22O13	Quercetin-3-O-(6''-acetyl)galactoside	Flavonoids	Flavonols	-	3	down	up	5457	1209.5	9648	3058	603	1226.5	19830	15777	5709.8	42529	33037	33744	--	--
Lmhp009590	C25H50NO7P	LysoPC 17:1	Lipids	LPC	-	1	FALSE	up	886480	701840	858340	819400	1079700	1109700	362020	335490	256070	588380	659550	668630	--	--
pmn001382	C25H24O12	Isochlorogenic acid A	Phenolic acids	Phenolic acids	2450-53-5	2	up	FALSE	9633.5	2687.2	40693	304680	262900	296540	1046700	1026600	801180	1054500	867000	1215300	--	--
MWSmce346	C25H24O12	1,3-Dicaffeoylquinic acid	Phenolic acids	Phenolic acids	19870-46-3	3	up	FALSE	3898.5	6746.2	4484	108200	147770	133440	673810	632520	500580	658120	549500	725100	C10445	--
Li512115	C25H24O12	Isochlorogenic acid B*	Phenolic acids	Phenolic acids	14534-61-3	2	up	FALSE	23823	23379	61473	726100	613320	695210	991840	1253000	982900	1006900	680300	1143600	C10468	--
pmn001384	C25H24O12	Isochlorogenic acid C*	Phenolic acids	Phenolic acids	57378-72-0	2	up	FALSE	15808	15408	56867	767720	705480	542150	1051300	1200900	969390	846170	677810	1362300	--	--
pmp001259	C28H47NO8	5,8,11,14-Pentadecanoamide	Lipids	Free fatty acids	-	2	up	FALSE	32826	25480	28550	59143	49448	66503	79198	76560	105430	79586	60436	80534	--	--
Lmbn001181	C22H28O15	Fraxetin-7,8-di-O-glucoside	Lignans and Coumarins	Coumarins	-	2	FALSE	down	27179	37623	10023	18025	28070	17383	22651	23464	45577	14212	11871	16019	--	--
pmp000588	C25H24O14	Diosmetin-7-O-(6''-malonyl)glucoside	Flavonoids	Dihydroflavone	-	1	FALSE	down	2903.8	1118.5	1773.4	486.07	4198.4	6113.4	2941.5	1760.2	4061.9	240.65	721.85	2011.7	--	--
pmb0618	C28H34O16	Hesperetin-8-C-glucoside-3'-O-glucoside	Flavonoids	Flavonoid carbonoside	-	2	up	FALSE	2665.5	1719.5	1716.8	18525	4065.2	3977.5	99766	73509	129700	198890	156890	130550	--	--
Hmmp006067	C42H68O13	Oleanolic acid-3-O-glucosyl(1→2)glucoside	Terpenoids	Triterpene Saponin	-	2	FALSE	up	9	9	1987.4	2088.9	9	2343.3	1757.5	1665.4	993.51	6665.9	4614.1	2332.1	--	--
pmb0620	C34H42O21	Chrysoeriol-6,8-di-C-glucoside-7-O-glucoside	Flavonoids	Flavonoid carbonoside	-	2	up	FALSE	4205.9	9823.2	4438	24970	13254	17672	10789	11141	23483	18239	19136	18074	--	--
Zmcn006984	C47H76O17	Hederagenin 3-O-[β-D-glucosyl-(1-3)-a-L-rhamnopyransyl-(1-2)-a-L-arabinoside]	Terpenoids	Triterpene Saponin	-	2	up	FALSE	74.005	9	75.973	145.63	70.397	510.47	72.857	159.57	151.33	73.8	227.26	148.01	--	--
MWS20196	C41H30O27	Chebulagic acid	Tannins	Tannin	23094-71-5	2	up	FALSE	131850	55823	18000	308850	76711	151410	1915900	1375200	2401600	2247200	2177500	1338300	C10214	--
