# Supplementary material for: Transcriptome and Metabolome Analyses Revealed the Response Mechanism of Quinoa Seedlings to Different Phosphorus Stresses
Source: Int J Mol Sci. 2022 Apr 24;23(9):4704. doi: 10.3390/ijms23094704 (PMC9105174; doi:10.3390/ijms23094704)
Supplement: Supplementary file 1 [file ijms-23-04704-s001.zip › Table.S3.xlsx]

## Sheet: Sheet1
Table S3. K-means clustering data table for DEMs.
Index	Sub Class	Formula	Compounds	Class I	Class II	CAS	Level	W2-1	W2-2	W2-3	W4-1	W4-2	W4-3	W5-1	W5-2	W5-3	R2-1	R2-2	R2-3	R4-1	R4-2	R4-3	R5-1	R5-2	R5-3
pmb0782	11	C5H11N	Piperidine	Alkaloids	Piperidine alkaloids	110-89-4	3	2893500	2834000	2947700	7505000	8125400	4035200	3540400	3546500	3686800	5473000	3787800	5605200	7536100	6752900	6415600	5431600	3508700	4147400
pmf0096	7	C2H2O4	Oxalic acid	Organic acids	Organic acids	144-62-7	3	17176	29063	11390	37092	21276	22585	37384	32485	36817	36439	45992	53364	17376	21774	22542	48823	32213	34740
Lmlp001319	7	C4H10O2	2,3-Butanediol	Others	Saccharides and Alcohols	513-85-9	3	9991.5	16120	24243	13203	8405.8	9805.1	105000	156060	91795	226720	139320	148320	8046.4	7984.2	18286	211420	167020	196270
pmf0256	5	C6H14O	3-Methyl-1-pentanol	Others	Saccharides and Alcohols	589-35-5	3	716060	891110	860270	1009800	1126100	1181800	2188900	1800700	2057100	762710	983740	1545900	1052400	1889900	2604600	1542700	1137100	1743900
pme3011	2	C4H9NO2	γ-Aminobutyric acid	Organic acids	Organic acids	56-12-2	2	352420	334420	481380	291440	362730	220260	425540	435880	702400	476630	349270	407430	314330	214680	378310	1027800	843160	760970
ML10172161	5	C3H4O4	Hydroxypyruvic acid*	Organic acids	Organic acids	1113-60-6	3	18509	22000	19976	40424	22729	43994	28940	19586	25060	17853	14174	33967	69042	67982	41796	33174	18862	18861
Lmbn000193	5	C3H4O4	Tartronate semialdehyde*	Organic acids	Organic acids	2480-77-5	3	21826	25484	10767	26522	37508	64358	21914	30445	11296	24351	7023.2	32419	70718	86240	70350	24588	26680	14336
mws0576	2	C4H8O3	3-Hydroxybutyric acid	Organic acids	Organic acids	300-85-6	2	96684	98768	161200	43427	14815	21478	79602	136840	94837	38909	104930	70759	48890	6965.9	13838	163690	68343	147220
pme1975	5	C3H4O4	Malonic acid	Organic acids	Organic acids	141-82-2	3	110170	126860	117760	239480	161070	264530	117120	123120	149630	135560	152250	160630	504160	386660	368540	187080	144320	158190
MWS1776	2	C7H8O	m-Cresol	Phenolic acids	Phenolic acids	108-39-4	3	16992	19709	19043	1266.5	1411.1	6312.2	23910	13281	22760	20300	13241	15527	897.51	3824.1	1807.5	28082	25612	18413
mws1358	11	C6H6O2	Pyrocatechol	Phenolic acids	Phenolic acids	120-80-9	2	6599.5	25318	11324	22114	36036	29210	10338	9935.4	14128	10857	4257.1	5170.6	13589	35397	32947	4221.1	944.59	2826.9
mws0255	7	C4H5N3O	Cytosine	Nucleotides and derivatives	Nucleotides and derivatives	71-30-7	1	5147900	6470100	5408300	8505100	5699000	5891400	7422400	6750500	13020000	14772000	15636000	16814000	11133000	8139900	7018800	12941000	12478000	12639000
MWS5173	5	C4H5N3O	Isocytosine	Nucleotides and derivatives	Nucleotides and derivatives	108-53-2	3	2681.2	7618.8	12721	15368	14223	9488.3	6747.9	8136.7	5613.1	7373.5	9901.5	11993	27313	27670	126230	14908	9389.9	11680
pme2122	7	C5H9N3	Histamine	Alkaloids	Alkaloids	51-45-6	1	1192500	1195500	903650	1637100	1149400	997890	1521100	1245100	2164700	3451500	3391300	3021500	2660000	2016400	2004200	3427400	3075100	2470400
mws0376	6	C4H4O4	Fumaric acid	Organic acids	Organic acids	110-17-8	3	555790	709190	702100	1338200	1749500	937680	528440	1411900	717470	810830	427100	861040	1429300	627950	899530	721120	1004200	895290
pmb1096	5	C8H7N	Indole	Alkaloids	Plumerane	120-72-9	1	9612.1	8117.5	6563	22270	20612	11265	9070.1	10297	15138	12784	8455.6	21698	38979	22211	25090	12476	10767	11775
MWS5209	11	C5H11NO2	N-Methyl-α-aminoisobutyric acid	Amino acids and derivatives	Amino acids and derivatives	2566-34-9	1	24710000	28967000	37142000	41437000	48777000	56409000	26097000	24347000	28715000	33307000	29203000	35984000	52559000	37603000	57306000	23688000	23368000	22316000
pma0134	6	C4H8O4	D-Threose	Others	Saccharides and Alcohols	95-43-2	3	164840	192320	217180	323800	362710	307040	178810	168130	191790	126940	133920	177760	170680	134660	108240	111700	92317	96490
pmb0069	4	C7H7NO	Benzamide	Phenolic acids	Phenolic acids	55-21-0	3	65753000	101740000	99269000	108070000	106470000	109150000	78342000	60096000	81066000	38671000	39073000	36398000	26553000	26604000	19409000	29333000	24164000	27683000
MWSslk106	4	C8H11N	2-Phenylethylamine	Alkaloids	Benzylphenylethylamine alkaloids	64-04-0	1	69889000	105930000	93143000	103390000	111760000	114080000	85335000	63128000	69472000	41075000	41121000	39097000	29580000	29340000	20700000	29949000	25054000	29518000
MWSmce207	11	C6H6N2O	Acetylpyrazine	Others	Others	22047-25-2	3	23372	23597	11656	37861	36107	44050	33590	14760	28257	27449	29909	22703	45049	35476	32662	29289	26138	24824
MWSmce039	1	C6H5NO2	Isonicotinic acid	Others	Vitamin	55-22-1	3	5544.1	10241	13706	15047	12962	6518.2	19526	18014	19057	7492.9	10107	6980.3	4864.4	3989.2	10248	15030	16074	15541
MWSmce118	7	C5H6N2O2	Imidazole-4-Acetic Acid*	Organic acids	Organic acids	645-65-8	2	50435	32278	64065	54929	63403	100170	176940	79742	152470	88776	139190	83946	141980	69475	81394	132800	146710	125860
MWSmce709	1	C9H7N	Isoquinoline	Alkaloids	Isoquinoline alkaloids	119-65-3	2	104050	121780	122110	27420	29120	48361	125690	151180	137420	104200	90135	58697	26413	36235	36487	92641	74241	76898
mws0425	9	C5H6O4	Citraconic acid	Organic acids	Organic acids	498-23-7	3	43703	62412	61093	35338	36781	63572	71686	73404	34565	39597	14562	44527	14404	18339	14835	18568	24073	33604
mws0216	11	C5H9NO3	Trans-4-Hydroxy-L-proline	Amino acids and derivatives	Amino acids and derivatives	51-35-4	2	18290000	17969000	20419000	50003000	54701000	23934000	23014000	25171000	25509000	33107000	22679000	30268000	44583000	30019000	33464000	33424000	20787000	25149000
pmp001198	11	C6H13NO2	6-Deoxyfagomine	Alkaloids	Piperidine alkaloids	197449-09-5	1	3130600	3056300	3335300	7741300	9063000	4421000	3858100	4134000	4421200	5626800	4140000	6129300	8124300	7388300	6928500	5734600	3719800	4167100
mws0227	11	C6H13NO2	L-Leucine*	Amino acids and derivatives	Amino acids and derivatives	61-90-5	1	554140	599440	608570	1480500	1670900	885360	714950	699090	767180	993470	740460	1081300	1413900	1344500	1406800	1051600	671310	775220
pme0274	11	C6H13NO2	6-Aminocaproic acid	Organic acids	Organic acids	60-32-2	2	387010	417240	424280	1118400	1248800	574100	460820	486110	558690	751830	541160	782440	1165200	855000	855060	681850	426620	544860
mws1167	12	C4H4O5	Oxaloacetic acid	Organic acids	Organic acids	328-42-7	3	48980	30992	58792	121170	137870	122390	89261	61696	87734	219020	229080	260490	93575	239430	169710	209420	172120	194020
Lmgn000160	6	C4H8N2O3	3-Ureidopropionic Acid	Organic acids	Organic acids	462-88-4	1	7506	6813.8	10241	47929	79869	23615	3411	10868	5947.5	12018	10786	13215	28034	14841	21140	15391	14363	9579.8
mws0972	1	C6H12O3	6-Hydroxyhexanoic acid	Organic acids	Organic acids	1191-25-9	1	2349000	2265800	2096900	487270	744430	1404300	1595100	4215700	3889100	1653600	1952800	2902000	281650	633980	325730	1901700	2710200	1891000
Lmrn002746	8	C6H12O3	2-Hydroxy-4-methylpentanoic acid	Organic acids	Organic acids	498-36-2	1	13364	23025	14028	62535	62669	38547	18996	13439	19902	154120	143990	154340	215780	243160	251160	147660	138180	152000
mws0341	8	C6H12O3	2-Hydroxyisocaproic acid	Organic acids	Organic acids	20312-37-2	1	55289	31106	67464	73077	73750	60338	50950	51418	45188	111390	71716	89523	117970	61100	140420	142160	81805	115090
mws0219	2	C4H7NO4	L-Aspartic Acid	Amino acids and derivatives	Amino acids and derivatives	56-84-8	1	10263000	12458000	11832000	10793000	10253000	8977400	11935000	11671000	12070000	10463000	12581000	8473200	6902200	6668500	5847100	12602000	13805000	12444000
MWS1882	2	C4H7NO4	Iminodiacetic acid	Organic acids	Organic acids	142-73-4	1	1427600	1486000	1618600	1252600	1413600	1191600	1315200	1503400	1425500	1191800	1411800	1059400	933570	809340	640090	1670200	1808200	1722800
Lmbn000198	5	C4H6O5	3-Dehydro-L-Threonic Acid*	Organic acids	Organic acids	-	1	6670200	7291800	6982400	8679100	9624300	12762000	9542700	7789200	9684200	7720600	7846100	6059200	17961000	16650000	16614000	9843500	7325100	8129200
mws0275	5	C4H6O5	L-Malic acid*	Organic acids	Organic acids	97-67-6	1	1990900	1980200	1682200	2067800	2492200	3652700	2559900	2058200	2501900	1583100	2020400	1734500	5462700	4359100	4845300	2726000	1677100	2037400
pme0040	8	C5H5N5	Adenine	Nucleotides and derivatives	Nucleotides and derivatives	73-24-5	1	10487000	13432000	10601000	20505000	20267000	23678000	17696000	13927000	14632000	43319000	45948000	59831000	83340000	90321000	74019000	41584000	31360000	44126000
pmb0374	4	C5H5N5	2-Aminopurine	Nucleotides and derivatives	Nucleotides and derivatives	452-06-2	1	2500200	2757900	2722700	2786100	2761300	2705000	2657700	2863300	3005100	1919000	2526800	2366200	1020400	882290	1263700	2070600	1878500	1750200
pme0033	5	C5H4N4O	Hypoxanthine	Nucleotides and derivatives	Nucleotides and derivatives	68-94-0	3	68146	69432	71722	162650	148040	152700	107840	73744	83326	222640	223460	324580	548650	598850	385000	178300	159260	210530
MWSmce466	6	C8H8O2	4'-Hydroxyacetophenone	Phenolic acids	Phenolic acids	99-93-4	3	24009	45391	33690	128820	120740	90476	55194	60681	53836	33781	38264	40660	37382	24804	18138	36294	31258	43043
mws1078	1	C7H7NO2	Anthranilic Acid	Phenolic acids	Phenolic acids	118-92-3	3	1424600	1515100	1753200	637450	667920	724480	1506300	1637800	1483900	898950	1013500	897620	507840	439000	364950	1194400	1292600	1178000
mws0146	11	C7H7NO2	Nicotinic Acid Methyl Ester(Methyl Nicotinate)	Alkaloids	Pyridine alkaloids	93-60-7	3	94690	127300	74946	234350	241240	208230	159490	165460	130200	109470	103400	161910	165500	209360	182450	118960	108810	73798
pme1002	6	C8H11NO	L-Tyramine	Amino acids and derivatives	Amino acids and derivatives	51-67-2	1	4607900	6733500	5882500	9777600	9849700	8376600	4609600	3466700	5278400	2539400	2387500	4394600	5627400	4357700	3620700	2992000	2391700	2182000
pma0948	6	C8H11NO	Phenylethanolamine	Alkaloids	Alkaloids	7568-93-6	3	1191900	1816500	1703100	2904400	2733700	2442700	1232000	1009300	1466400	717690	788250	1340200	1971800	1411700	1122100	898810	715330	696810
MWSCX016	11	C7H6O3	p-hydroxybenzoic acid	Phenolic acids	Phenolic acids	99-96-7	3	137360	199080	204030	202020	304760	238870	148500	210970	167720	111250	113140	124380	286850	290920	133040	98904	85385	119890
Lmbn001981	11	C7H6O3	2,5-Dihydroxybenzaldehyde*	Phenolic acids	Phenolic acids	1194-98-5	2	1086100	2088800	1706400	1850000	2892700	2128500	1471600	1759200	1690800	1166200	1276600	1274300	3091800	3076000	1388700	1422100	1031500	1475000
MWS1850	10	C8H10O2	2-Phenoxyethanol	Phenolic acids	Phenolic acids	122-99-6	3	41213	30440	34115	10965	13896	8495	44441	45696	18375	39913	38265	41352	47770	49327	41854	76016	39427	57238
mws0704	2	C2H8NO4P	O-Phosphorylethanolamine	Alkaloids	Alkaloids	1071-23-4	3	32163	25812	30910	306.81	585.95	1005.4	53848	43869	53428	46965	41760	28216	1162	2916.4	5532.2	139830	102840	119070
MWS1875	10	C10H8O	2-Naphthol	Phenolic acids	Phenolic acids	135-19-3	3	15427	13179	15040	12732	8728	10844	14863	14037	14268	22037	20315	17088	17168	15444	27167	34846	30003	28701
MWS2066	10	C10H8O	1-Naphthol	Phenolic acids	Phenolic acids	90-15-3	3	13037	9818.1	13613	8427.8	7706.4	9642.4	9970.3	13004	11486	21940	16591	13502	15338	13242	25284	31207	22834	23708
pme0295	2	C6H11NO3	4-Acetamidobutyric acid	Organic acids	Organic acids	3025-96-5	3	66538	62176	90329	37362	55966	38467	79225	81818	80165	65500	79016	94473	31810	49944	74062	94955	115570	118970
mws0567	8	C5H11N3O2	4-Guanidinobutyric acid	Organic acids	Organic acids	463-00-3	3	186050	204160	194590	128690	120170	156580	169730	205770	224350	204160	212640	285210	152700	256850	565000	223140	223220	215220
mws0017	4	C7H19N3	Spermidine	Alkaloids	Alkaloids	124-20-9	3	16067	15648	21828	16363	12936	8983.2	10536	10385	14036	10655	9593.3	7662.9	6968.2	4540	6321.7	4652.3	4809.5	6396.9
Lmgn000224	9	C5H6O5	2-Methyl-3-oxosuccinic acid	Organic acids	Organic acids	-	3	17611	16704	16961	20554	6723.8	17484	30637	31199	26025	11803	8316.8	12188	34917	5778.5	8425	12301	7900.8	13596
pme2380	9	C5H6O5	α-Ketoglutaric acid	Organic acids	Organic acids	328-50-7	3	110620	139220	136050	52539	51392	100260	165330	227410	245450	51092	70958	48994	139440	72888	78195	64231	45054	60260
mws1012	2	C9H6O2	Coumarin	Lignans and Coumarins	Coumarins	91-64-5	2	24048	17748	19788	7134.6	7914.1	11160	14134	26839	15941	19992	16633	13997	13497	11836	17119	21604	20673	21137
Wmzn000227	6	C6H10O4	2,2-Dimethylsuccinic acid	Organic acids	Organic acids	597-43-3	1	12855	27134	24647	152840	202360	46077	32686	23024	30766	62480	51450	96003	57756	35098	45836	72426	33262	55335
Lmbn001676	3	C6H10O4	3-Hydroxy-3-Methyl-2-Oxopentanoic Acid	Organic acids	Organic acids	-	3	17036	22068	23124	4545.8	6238.6	17076	16302	20163	17598	19959	21793	26147	9983.4	18384	4138.5	18699	15055	18388
MWSmce572	9	C9H9NO	Cinnamamide	Others	Others	22031-64-7	3	16208	73251	54903	18005	33625	30053	65634	117160	23829	56268	9946.6	66851	8134.3	7208.6	3301.2	7399.2	4952.3	35377
MWSmce698	9	C10H12O	2',4'-Dimethylacetophenone	Others	Others	89-74-7	3	57713	62893	63081	50535	65920	69101	74330	73392	89357	50159	55177	65432	54140	66489	65901	30698	37219	30980
Lmgp000796	2	C8H7NO2	4-Hydroxymandelonitrile	Alkaloids	Phenolamine	13093-65-7	1	2288800	2287000	2258000	1226500	1250200	1390300	2728300	3120600	3407100	1789500	2132600	2103500	955210	876140	1003200	3008800	3125800	2871100
pme1210	2	C5H11NO2S	L-Methionine	Amino acids and derivatives	Amino acids and derivatives	63-68-3	1	2368400	2411400	2274300	1299700	1198500	1503600	2874200	3497300	3285600	1647000	2193600	2138400	939970	861460	957670	3118500	3024400	3188700
mws0847	1	C6H7N5	1-Methyladenine	Nucleotides and derivatives	Nucleotides and derivatives	5142-22-3	2	65954	105590	80836	38987	42437	46645	116280	111060	100070	66122	65000	72742	26179	30946	21817	69340	71901	79070
Lmxp001668	5	C9H10O2	2-Methoxy-4-ethenylphenol	Phenolic acids	Phenolic acids	7786-61-0	1	24135	6039.1	19325	320420	387570	445890	10918	32985	19388	711310	578480	993090	2090100	2162400	1894000	852560	551600	300550
Lmxn006423	10	C7H5NOS	2(3H)-Benzothiazolone	Alkaloids	Alkaloids	934-34-9	1	49706	28650	45089	27151	21598	31502	30732	33856	47468	53213	50954	39763	49211	50660	64999	68595	77415	64271
pme0183	6	C5H5N5O	Isoguanine	Nucleotides and derivatives	Nucleotides and derivatives	3373-53-3	1	196390	327950	267480	687790	648760	537080	272560	398220	239400	206880	206040	345950	471790	382600	280260	208550	180330	201280
pme1109	6	C5H5N5O	Guanine	Nucleotides and derivatives	Nucleotides and derivatives	73-40-5	1	1118200	1966000	2050700	5795600	4838500	4345300	1667600	2369900	1387300	1440000	950940	2213000	4118300	3199700	2063400	1309100	842390	1295600
mws4177	3	C8H9NO2	Methyl Anthranilate	Phenolic acids	Phenolic acids	134-20-3	3	7770.6	7052.1	8054.5	4444.9	4187	6446	4512	8923.7	8276.2	10150	8215.7	10884	4955.2	3473.2	3298.9	6172.2	8616.2	7442.2
MWS2984	6	C4H4N6O	8-Azaguanine	Nucleotides and derivatives	Nucleotides and derivatives	134-58-7	3	131480	269560	255610	527380	507920	405320	202220	226050	182070	178370	138180	241870	383110	309120	185710	131470	115300	142260
MWS2058	3	C8H8O3	3-Methylsalicylic Acid	Phenolic acids	Phenolic acids	83-40-9	3	4363.1	7693.8	6828.8	3879.6	5377	4897.4	6261	5830.2	4553.8	5429.8	6025.2	4193.7	2232.6	3159.1	2049.2	3208	4581.6	4143.2
MWS1962	10	C10H16O	cis-Citral	Organic acids	Organic acids	5392-40-5	3	10136	11232	14244	5642.2	5794.1	5937.1	5999.3	8023.7	11299	9621.5	14031	10044	8565.4	10292	9220.2	7734.2	12183	10612
Hmlp000935	11	C8H11NO2	Vanillylamine	Alkaloids	Phenolamine	1196-92-5	2	226600	177390	217380	1614600	1884400	1347400	204350	121710	209730	660670	523460	812350	2460300	3517500	1240600	493990	486300	584810
mws4002	11	C8H11NO2	Dopamine	Alkaloids	Phenolamine	51-61-6	1	1398900	1186200	1495000	9573200	10021000	7628100	1225000	711700	1239600	3934400	2776000	2706300	12222000	22509000	8799900	2119100	1675400	2281200
mws0885	4	C7H6O4	2,4-Dihydroxybenzoic acid	Phenolic acids	Phenolic acids	89-86-1	1	1003400	696160	838700	1484500	838400	1175600	719750	432340	823610	242740	107570	218990	789870	549270	346060	262520	383320	354720
mws0180	8	C7H6O4	2,5-Dihydroxybenzoic acid; Gentisic Acid	Phenolic acids	Phenolic acids	490-79-9	1	73082	55257	83293	27130	91691	80577	73437	56420	34679	146080	76970	188610	169290	151900	122820	132000	65309	88878
MWSmce264	5	C8H10O3	Hydroxytyrosol	Phenolic acids	Phenolic acids	10597-60-1	3	6486	10197	11562	11991	17350	8991.4	4976.6	10193	6740.4	11046	5697	8674.8	19845	19265	15752	6931.1	7115.6	8247.5
mws0254	7	C6H9N3O2	L-Histidine	Amino acids and derivatives	Amino acids and derivatives	71-00-1	1	1329400	1326300	1484100	1302600	1231300	680020	2017200	1707700	1259200	3800500	4535900	5314200	2655500	1675700	2308400	3860600	2538800	3164100
pme2165	9	C5H4N2O4	Orotic acid	Others	Vitamin	65-86-1	3	672750	580980	731870	300550	189960	209360	789450	859290	1015900	237420	337940	414910	174030	205100	407450	319730	356980	225780
pmb0819	11	C10H8N2	3-Indoleacetonitrile	Alkaloids	Plumerane	771-51-7	3	66778	51507	82544	159860	208620	101980	112870	90473	114070	119280	68619	121610	237870	148000	162600	110730	60055	75072
Lmbn002072	9	C7H12O4	2-Propylsuccinic acid*	Organic acids	Organic acids	618-57-5	3	51808	1392.2	1341	21354	21085	8485	75420	1391.8	1151.8	4943	481.25	7028.5	5370.8	2323.5	6593	5188	5642	5661.8
Zmjn001813	4	C7H12O4	Pimelic acid*	Organic acids	Organic acids	111-16-0	3	43705	962.5	2294.5	16715	11305	11978	45277	1870.5	941.5	2823.5	4218	5883.8	2108.8	7726	1414.2	4800.8	4704.8	8067.8
mws0005	11	C10H12N2	Tryptamine	Alkaloids	Plumerane	61-54-1	1	16915000	24167000	20288000	92415000	102420000	69855000	23852000	19204000	18625000	32220000	38358000	61285000	79606000	64697000	29965000	30329000	23576000	26687000
Lmgp001898	8	C9H7NO2	4,6-Dihydroxyquinoline	Alkaloids	Quinoline alkaloids	3517-61-1	1	4737.9	8531.2	8460.8	6565.5	2326.2	4500.7	9626.4	2623.3	8345.1	23056	11811	6027.2	8924.1	22186	10418	13813	13882	11322
pme2914	5	C6H10O5	3-Hydroxy-3-methylpentane-1,5-dioic acid	Amino acids and derivatives	Amino acids and derivatives	503-49-1	1	115610	108460	122800	228600	225500	174140	145210	120820	119020	218670	222300	211770	617570	499900	511070	319250	307540	226080
MWS0559	9	C6H10O5	1,6-anhydro-β-D-glucose	Others	Saccharides and Alcohols	498-07-7	3	13833	35554	52523	35112	18600	57889	111730	18296	23768	12463	34268	26322	41966	23679	31124	9440.8	12330	7649.5
pme1419	2	C6H13NO2S	L-Methionine methyl ester	Amino acids and derivatives	Amino acids and derivatives	10332-17-9	3	116300	114540	117130	62918	59703	60196	140900	176910	121370	112770	98459	141320	31071	39837	36197	150340	149610	147980
Lmbp000123	2	C6H13NO2S	L-Homomethionine	Amino acids and derivatives	Amino acids and derivatives	25148-30-5	3	739300	979680	1195400	721680	707910	283020	1038800	1345700	915700	1148100	870190	682000	344460	181490	360680	1912800	812340	1109700
mws1641	3	C6H4N4O2	Lumazine	Nucleotides and derivatives	Nucleotides and derivatives	487-21-8	3	24837	52785	41284	19316	38052	36475	51358	90406	35165	49420	34057	74613	19460	25482	23049	34397	36082	45673
Lmbn002739	7	C9H8O3	3-Hydroxycinnamic Acid	Phenolic acids	Phenolic acids	14755-02-3	3	338400	348060	396340	116040	132110	128350	489520	534530	333150	628610	454930	741400	165460	267040	254860	619040	666110	554580
pme2529	12	C6H12O5	1,5-Anhydro-D-glucitol	Others	Saccharides and Alcohols	154-58-5	3	87018	116880	72218	107100	77902	111740	82024	102250	95918	193610	138360	238870	111630	97796	98989	70613	87609	117030
pme3083	4	C8H7NO3	2-(Formylamino)benzoic acid	Phenolic acids	Phenolic acids	3342-77-6	3	437920	988430	801330	797650	1114600	885300	1061700	1266800	605140	604440	369810	900780	477410	201400	298780	275490	353030	527130
pme3968	9	C6H7N5O	7-Methylguanine	Nucleotides and derivatives	Nucleotides and derivatives	578-76-7	3	42396	43754	59519	9	9	9	51122	78069	51510	9	9	9	9	9	9	9	9	9
MWS4525	9	C6H7N5O	6-O-methylguanine	Nucleotides and derivatives	Nucleotides and derivatives	20535-83-5	1	57476	80442	97412	87219	27656	22695	77450	120280	114080	18619	4727.7	33348	9	6332.4	9	9	6231.7	20082
pmb0037	11	C10H15NO	Hordenine	Alkaloids	Phenolamine	539-15-1	3	539180	698790	630380	3032200	2935800	1661700	839180	717960	694840	697800	1024400	1387700	2056500	2403900	973520	797580	1032400	1009200
Lmrn003000	8	C9H10O3	2-Hydroxy-3-phenylpropanoic acid	Phenolic acids	Phenolic acids	7326-19-4	1	2380.2	5306.2	3522.2	28282	23242	30546	15291	6046	7009.8	128830	93158	90552	117030	101940	110960	95584	77871	109400
Lmbn005172	8	C9H10O3	2,6-Dimethoxybenzaldehyde	Phenolic acids	Phenolic acids	3392-97-0	1	8771.8	8760.5	13333	69522	58776	52508	16385	13421	16474	162980	176210	162580	166390	183480	188780	151320	139060	123820
MWSmce528	1	C9H10O3	2,3-Dimethoxybenzaldehyde	Phenolic acids	Phenolic acids	86-51-1	3	2442.7	5457.9	3831	1023.4	3037.3	1567.6	5639.5	4731.3	4332.8	1930.3	3309	2289.2	4552.3	4561.5	2079.4	3269.4	813.51	4921.3
mws2125	7	C3H5O6P	Phosphoenolpyruvate	Organic acids	Organic acids	138-08-9	3	188070	71850	63352	7845.2	3122	4446.5	238850	179690	115640	527000	459690	186010	5613.5	1113.5	9184.5	966250	1259800	1581200
MWSmce501	8	C8H8O4	Protocatechuic Acid Methyl Ester	Phenolic acids	Phenolic acids	2150-43-8	3	51930	22796	18948	36691	29289	26237	44601	31585	21714	111870	56592	106670	78738	120710	93576	57370	66162	88633
Hmbp001276	8	C8H8O4	Gallacetophenone	Phenolic acids	Phenolic acids	528-21-2	1	56481	50427	49323	30773	35658	33330	70538	42039	46700	151420	136370	85451	118870	130070	123720	130430	144690	136290
pme1292	9	C8H8O4	Homogentisic acid	Phenolic acids	Phenolic acids	451-13-8	3	208940	207400	185240	83578	56577	40020	73931	156830	202890	294900	115460	61423	44329	155030	138970	31576	19521	57825
MWSmce490	6	C8H8O4	2',4',6'-Trihydroxyacetophenone	Phenolic acids	Phenolic acids	480-66-0	3	15174	26264	16286	18923	34624	31267	15903	4397.9	12056	11791	8608.5	9856.5	27345	20820	22107	11860	6427.1	9040.2
MWStz091	2	C8H12N2O2	Cyclo(L-Ala-L-Pro)	Amino acids and derivatives	Amino acids and derivatives	36357-32-1	3	81663	99003	93726	70972	76273	71174	114910	129530	86725	124060	109000	121390	63586	70260	67042	138180	138740	140270
pme1383	2	C8H11NO3	Pyridoxine	Others	Vitamin	65-23-6	1	255000	474080	527580	580170	556150	516360	840920	815340	570920	347290	441230	426910	358500	295310	282230	814390	744310	824530
Zmzn000078	2	C3H7O6P	Dihydroxyacetone phosphate	Others	Saccharides and Alcohols	57-04-5	3	100690	79927	84159	7338.5	6539.4	10683	99031	64095	57768	162770	151220	80490	5859.7	13585	11273	143310	160490	155500
pme3186	2	C3H7O6P	DL-Glyceraldehyde-3-phosphate	Organic acids	Organic acids	591-59-3	3	146770	128480	151620	20761	7494	18149	236010	148190	135300	207280	210620	143900	18383	23751	27952	354560	269650	343320
MWSslk138	9	C7H6O5	2,3,4-Trihydroxybenzoic acid	Phenolic acids	Phenolic acids	610-02-6	2	115980	145180	206290	91488	106360	99464	134130	160680	129700	106600	64900	100780	117440	197050	166450	73219	67035	44842
Hmln008318	10	C10H18O2	8-Methyl-6-nonenoic acid	Organic acids	Organic acids	59320-77-3	3	5709.2	5422.4	5667.7	2894.7	1942.7	1789.9	3330.3	3733.9	3971.1	5157.2	5291.8	5596.9	2819.4	3778.4	4551.1	5962.4	5166.3	5282.3
MWS1812	9	C11H22O	2-Undecanone	Others	Others	112-12-9	3	12701	5413.1	13318	7505.7	4851.4	4602.9	12566	17121	24703	7032	5517.3	2989.2	2197.4	15029	15073	3009.1	9732.1	6992.5
pme3009	4	C6H6O6	Trans-Citridic acid	Organic acids	Organic acids	4023-65-8	2	548970	553690	579700	576710	874080	564800	514720	573730	637820	726220	220540	397500	658710	569540	422180	142760	237090	150260
MA10039492	7	C6H6O6	Dehydroascorbic acid	Others	Vitamin	490-83-5	1	577990	561690	632770	667230	556200	660400	720590	685140	657180	599150	750550	974800	423420	462090	327520	1137200	1142200	924420
mws0242	3	C8H14O4	Suberic Acid	Organic acids	Organic acids	505-48-6	2	61782	54564	60388	74492	107210	69084	55534	109520	118600	104540	73964	102110	37167	38116	30194	70692	106950	123850
Lmgn002555	8	C8H14O4	2-Propylglutaric acid	Organic acids	Organic acids	32806-62-5	2	827420	970970	1032400	2546700	2680300	2899400	1581600	967480	1054700	17476000	13264000	11913000	16185000	14980000	17339000	16777000	14501000	17633000
Zmyn000155	5	C7H14N2O3	N-α-Acetyl-L-ornithine	Amino acids and derivatives	Amino acids and derivatives	6205-08-9	1	69748	60382	58846	530330	553930	110700	126300	36183	80838	253290	131500	174420	915010	810730	4928000	233190	72735	129630
mws0260	5	C6H14N4O2	L-Arginine	Amino acids and derivatives	Amino acids and derivatives	74-79-3	1	568320	520340	835980	2836300	3633400	1053700	1354000	672780	509850	1572300	1088400	1206600	1730600	5294100	10744000	1730300	719170	1243300
pme0008	8	C6H13N3O3	L-Citrulline	Amino acids and derivatives	Amino acids and derivatives	372-75-8	2	48403	12458	22401	77183	103510	29996	30787	33042	43927	83816	102040	131670	93869	106670	175370	123250	61676	117790
MWSmce690	7	C6H8O6	Erythorbic Acid; Isoascorbic Acid	Others	Vitamin	89-65-6	1	190050	322890	306820	734700	415030	476080	351410	372770	281190	530800	690790	2614700	648980	530110	468480	1431300	2480500	2114800
Zmgn001448	10	C7H12O5	2-Propylmalic Acid*	Organic acids	Organic acids	-	2	1850700	1539100	2161300	704740	557490	992470	3157300	2135100	2668800	2160900	2745100	2719500	1547700	2106800	2702200	2737600	2900200	3026800
Lmbn001754	10	C7H12O5	3-Isopropylmalic Acid*	Organic acids	Organic acids	921-28-8	2	1803900	1826400	2107300	682440	580480	1034600	3222800	2006300	2642400	2199500	2836400	2637700	1593600	2078900	3079900	2565800	2994400	3078800
pmb3101	10	C7H12O5	2-Isopropylmalic Acid	Organic acids	Organic acids	49601-06-1	1	1776400	1781100	1912800	587820	665390	999470	2900300	1927200	2345600	1957700	2594000	2534200	1452200	1899400	2784800	2653600	2834800	2889300
pme2024	11	C10H12N2O	Serotonin*	Alkaloids	Plumerane	50-67-9	1	2109300	3062200	2604400	11430000	15006000	8575900	2012900	1713800	2069500	3176700	2302300	3585200	10573000	11691000	4579000	1524000	960290	1117500
pmb0774	11	C10H12N2O	N-Hydroxytryptamine*	Alkaloids	Plumerane	-	1	1958000	2852500	2371300	10255000	13957000	8092100	1790300	1549100	1984800	3029800	2116700	3026500	9993600	10588000	4184100	1507700	885830	980590
pmb0468	11	C6H11NO3S	N-Formyl-L-Methionine	Amino acids and derivatives	Amino acids and derivatives	4289-98-9	3	43107	59776	52632	215260	301220	169420	41619	29726	44307	76178	50565	80768	205110	232890	96418	31152	26386	21241
mws1013	4	C9H6O4	Esculetin	Lignans and Coumarins	Coumarins	305-01-1	1	1506400	1377300	1899900	1445900	1350000	1252200	1718400	1765700	1657300	374140	247770	375710	426450	456390	442690	367700	324270	544740
mws0009	7	C10H10O3	Coniferaldehyde	Phenolic acids	Phenolic acids	20649-42-7	2	47440	44793	32482	12521	22884	18001	32064	45589	44279	66611	66880	75373	8033.6	13892	8419.6	84488	98894	85855
mws0981	8	C6H5N5O2	Isoxanthopterin	Nucleotides and derivatives	Nucleotides and derivatives	529-69-1	1	2129.7	2829.7	3845	19343	8854.3	19868	4767.1	6013.1	4256.7	17578	16708	16478	22427	31464	23321	16065	15071	11709
MWSmce001	9	C9H8O4	5-Acetylsalicylic acid	Phenolic acids	Phenolic acids	13110-96-8	3	71864	34652	64148	55276	40770	38191	31817	48352	71070	47555	41692	28357	43729	70844	55408	34156	25884	16336
pmf0139	11	C6H12O6	D-Galactose*	Others	Saccharides and Alcohols	59-23-4	1	551840	648820	594850	1439300	1245600	1295100	621300	669420	753560	837890	974910	763810	1312500	1876400	1431200	566170	656250	501670
mws0663	7	C7H8N4O2	1,7-Dimethylxanthine	Nucleotides and derivatives	Nucleotides and derivatives	611-59-6	3	453.9	5428.8	1347.8	7708.2	6511.3	9001.5	14105	12597	11359	16226	12032	15226	675.39	454.49	449.32	15322	9903.9	17386
MWS2070	7	C10H12O3	Propyl 4-hydroxybenzoate	Phenolic acids	Phenolic acids	94-13-3	3	6418.9	9533.5	10512	55338	57592	45760	114440	132180	118100	185970	152560	117320	5223.3	7061.2	7347	129250	102160	165390
mws0093	3	C10H12O3	Coniferyl alcohol	Phenolic acids	Phenolic acids	458-35-5	2	15753	30168	26897	15755	13508	31932	29688	32670	21566	26388	16067	35701	11228	9425.8	8091.2	25307	17476	33281
pmb1754	2	C5H15NO4P+	O-Phosphocholine	Alkaloids	Alkaloids	107-73-3	3	909390	931490	1226700	146740	83880	105690	1427000	1471000	1420200	1280000	900030	698700	174680	186730	328180	1818100	1235000	1636800
Zmgn000447	7	C3H7O7P	3-Phospho-D-glyceric acid	Others	Saccharides and Alcohols	820-11-1	3	512410	232530	200130	22306	15878	19810	639550	486870	345120	1705900	1397300	684650	14363	23889	49190	2390300	3198100	3334400
Hmgp002327	11	C11H9O2N	3-amino-2-naphthoic acid	Alkaloids	Alkaloids	-	1	6574400	6622300	7626400	20523000	22793000	12572000	10162000	10170000	9291500	12424000	7400100	16926000	26834000	17375000	17054000	12811000	7137100	8097600
Hmmp001310	11	C11H9NO2	3-Indoleacrylic acid	Alkaloids	Plumerane	1204-06-4	3	6656900	5782000	7429500	21211000	21977000	11792000	9762600	9249400	8888700	11012000	7073200	17332000	25923000	16048000	17416000	11914000	6658300	7545900
pmn001492	1	C11H8O3	Ayapin	Lignans and Coumarins	Coumarins	494-56-4	2	165200	160810	201170	113760	130930	97426	199520	243100	275000	175210	160050	163250	155810	116560	119520	242660	168650	186920
pme0137	11	C7H12N2O4	N-Acetyl-L-Glutamine	Amino acids and derivatives	Amino acids and derivatives	2490-97-3	2	9514.4	20656	4154.2	18719	19206	12208	13040	5046.2	13478	6712.1	3858.8	8874.1	27704	20453	15203	8540.2	16472	9267.5
mws0237	1	C9H16O4	Azelaic acid	Organic acids	Organic acids	123-99-9	1	2944600	3372500	3537400	1955500	2094200	1960900	3564900	4156100	4757100	3054700	2837600	2852700	2537100	2061800	2488800	4049700	3168600	3161900
pme0122	12	C8H16N2O3	N6-Acetyl-L-lysine	Amino acids and derivatives	Amino acids and derivatives	692-04-6	1	23149	15136	18499	29916	48895	42786	20087	16379	33040	46509	44282	73661	78927	73400	20871	30691	26095	33527
Zmjp000182	5	C7H16N4O2	N-Monomethyl-L-arginine	Amino acids and derivatives	Amino acids and derivatives	17035-90-4	2	283020	324390	367760	871620	1036600	443090	470580	446340	340570	582110	576710	942680	1058800	1019800	1846600	489150	397120	527070
pmf0348	1	C10H20O3	2,6-Dimethyl-7-octene-2,3,6-triol	Others	Saccharides and Alcohols	73815-21-1	3	258220	251960	296070	161330	166680	163980	284820	368370	380390	244900	227760	195910	198460	165140	195140	321070	251070	275290
MWSslk080	1	C10H20O3	10-Hydroxydecanoic acid	Lipids	Free fatty acids	1679-53-4	3	27183	38861	43832	5625.7	3220.1	4341.1	41455	34711	25336	28896	13037	12620	931.33	372.41	1299.7	29952	34022	28519
Zmtn001624	9	C10H7NO3	N-Acetylisatin	Alkaloids	Plumerane	574-17-4	2	5305000	4799200	5980200	4825500	4342700	4473100	4755300	6236300	7032700	3440500	3400700	3674300	4679500	4686500	5451600	2798900	3499900	2692400
pme0075	2	C7H11NO5	N-Acetyl-L-glutamic acid	Amino acids and derivatives	Amino acids and derivatives	1188-37-0	1	1511500	1459100	1181500	655580	603230	643870	1270700	1619500	1241200	1151700	943940	839110	640060	573480	611000	1426100	1653700	1169600
pme2244	1	C11H11NO2	3-Indolepropionic acid	Alkaloids	Plumerane	830-96-6	1	211370	203370	209500	68539	54804	61927	215890	228700	201060	131740	143560	107420	45751	44801	53907	185980	154130	126990
pme0278	12	C7H14N2O4	2,6-Diaminooimelic acid	Organic acids	Organic acids	583-93-7	3	135060	101300	190790	170420	135350	69033	99540	91369	155380	230120	347460	327210	236950	98991	112000	240030	167480	206160
pme2993	5	C10H8O4	Scopoletin (7-Hydroxy-5-methoxycoumarin)	Lignans and Coumarins	Coumarins	92-61-5	3	18428	46869	63997	98990	139030	176470	39008	65291	46030	79849	108780	219030	390210	319590	172500	53832	19495	58689
MWS0686	6	C9H7NO4	5,6-Dihydroxy-1H-indole-2-carboxylic acid	Alkaloids	Plumerane	4790-08-3	3	5358.6	496.96	2458.5	18274	17551	29804	6572.4	4267.3	2245.3	5180.6	4981.7	7483.3	16725	16222	5174.7	13005	12136	9754.2
pme2743	6	C10H11NO3	N-Phenylacetylglycine	Amino acids and derivatives	Amino acids and derivatives	500-98-1	3	313710	213840	193020	923340	954170	541240	129760	157020	163730	86680	136850	152120	214610	195770	110160	54036	98132	56100
mws1189	5	C6H10O7	D-Galacturonic acid*	Organic acids	Organic acids	685-73-4	3	34269	30795	28054	41299	31412	31337	17290	25228	35227	30286	50675	34820	146630	60519	95816	34099	39677	44287
pme3705	5	C6H10O7	D-Glucoronic acid*	Others	Saccharides and Alcohols	6556-12-3	3	42190	37740	19428	36055	41525	49906	31525	23289	34556	53764	36329	36061	111970	95033	87166	33381	57730	47199
MWSmce632	1	C10H10O4	Vanillin acetate	Phenolic acids	Phenolic acids	881-68-5	2	609480	578430	696070	137410	147830	170870	758930	807030	764310	521500	465810	493860	294410	220800	284700	703130	664960	654260
Lmdn003756	10	C10H10O4	Methyl caffeate	Phenolic acids	Phenolic acids	3843-74-1	3	3238.8	8595	11852	4711.2	6912.7	9788.3	12518	13220	22765	19292	18245	14362	11938	14603	26713	22412	12687	16045
pme0422	10	C10H10O4	Isoferulic Acid*	Phenolic acids	Phenolic acids	537-73-5	1	1052100	654430	921690	127150	177750	203550	1008900	1058000	642830	1133700	1194900	1134000	1335200	925920	932770	2032600	1226800	1382300
mws0014	10	C10H10O4	Ferulic acid*	Phenolic acids	Phenolic acids	537-98-4	1	17735000	14241000	15720000	2314800	3595800	4023200	16337000	17046000	12268000	20167000	18640000	20603000	22156000	16501000	17197000	27940000	22361000	23577000
HJAP052	10	C10H12O4	2,4,5-Trimethoxybenzaldehyde	Phenolic acids	Phenolic acids	4460-86-0	3	5865.6	2190.4	6232.8	2538.1	3800	2654.3	1997.7	4699.6	1213.1	3319.6	5086.1	3244.9	4686.5	4317.5	7734.7	4351	7608.5	6759
MWS20182	10	C10H12O4	Dihydroferulic Acid	Phenolic acids	Phenolic acids	1135-23-5	2	71758	63090	79834	11294	10280	14047	79460	96048	49859	73695	87769	96328	97474	78482	65927	130450	91644	107970
MWSslk006	7	C10H12O4	Ethyl Vanillate	Phenolic acids	Phenolic acids	617-05-0	3	27858	26681	39784	11336	10776	11451	43252	28890	32497	71491	52697	49683	10044	11182	6777.9	81256	57831	58389
mws0612	4	C10H12O4	3,4-Dimethoxyphenyl acetic acid	Phenolic acids	Phenolic acids	93-40-3	3	16928	29710	22103	42474	35145	38187	17354	18526	29844	7853.8	9268	13095	3962.5	13682	6434.2	9439.5	3653.2	9953.2
pme3827	5	C9H11NO4	3,4-Dihydroxy-L-phenylalanine (L-Dopa)	Amino acids and derivatives	Amino acids and derivatives	59-92-7	1	31582	23638	10955	221030	288220	133940	17284	4978.1	16385	41286	39278	93055	620300	521320	300540	21657	34147	22414
mws0027	11	C9H10O5	Syringic acid	Phenolic acids	Phenolic acids	530-57-4	3	5646.2	6179.8	8600.2	11416	13771	21900	12669	7766	2275	13704	5400.5	4727	14593	11197	14141	6378.2	8243.2	13350
pmb2497	2	C9H10O5	4-Hydroxy-3-methoxymandelate	Phenolic acids	Phenolic acids	55-10-7	3	286580	294640	313270	130720	139090	141670	271890	343840	403130	211720	240320	193780	57575	117880	95868	307230	364610	368840
Zmzn000079	2	C4H9O7P	D-Erythrose-4-phosphate	Others	Saccharides and Alcohols	585-18-2	3	95303	76122	92665	20261	23398	18250	106160	118060	118660	75913	77167	55369	14195	17067	25994	144680	167150	151800
pmb2640	7	C12H24O2	Dodecanoic acid (Lauric acid)	Lipids	Free fatty acids	143-07-7	1	211400	162000	192390	149660	149440	149700	275320	273550	239030	461450	426690	363430	236220	214240	254180	384470	454040	442660
pmb0130	6	C12H14N2O	Acetryptine	Alkaloids	Plumerane	3551-18-6	3	13200	20307	18351	348670	66929	38352	28610	22255	16067	17674	19699	66752	40334	26228	13971	13530	5940.4	14438
pme0266	7	C10H18O4	Sebacate	Organic acids	Organic acids	111-20-6	1	2053	3693.9	1678.6	24604	39607	17087	31845	29039	23920	63491	37803	38165	1909.8	1536.3	2591.7	30880	30715	47568
mws0282	11	C11H12N2O2	L-Tryptophan	Amino acids and derivatives	Amino acids and derivatives	73-22-3	1	5599400	5286800	6212200	14465000	16492000	8863400	7333100	7184100	6313200	8731100	5743000	11889000	17386000	11991000	12341000	9167000	5242200	6441200
Zmbp002538	11	C11H12N2O2	1-Methoxy-indole-3-acetamide	Alkaloids	Plumerane	-	1	16675000	16172000	18156000	49173000	50708000	30095000	23728000	23865000	22841000	29616000	19281000	40719000	55987000	41045000	41363000	29973000	19185000	21273000
pmb0818	11	C11H11NO3	Methoxyindoleacetic acid	Alkaloids	Plumerane	3471-31-6	3	172910	192770	222070	638730	780210	399860	271780	292830	273810	389110	233730	468190	812970	505950	512990	364200	193780	249180
Lmyp003025	5	C11H11NO3	Coixlactam	Alkaloids	Quinoline alkaloids	-	2	32698	20454	12961	50808	47504	55204	25268	41208	17412	31307	48208	32292	112510	66370	81911	30228	32041	56736
pmp001236	8	C11H10O4	Clove chromone	Others	Others	-	2	10387	9121.4	7651.5	8974.3	1888.1	5500.6	11845	9816.8	11139	16326	23476	18733	11967	15742	30956	18898	22313	15928
Zmgn002106	11	C11H13NO3	N-Acetyl-L-phenylalanine	Amino acids and derivatives	Amino acids and derivatives	2018-61-3	2	80204	104860	119790	287680	282230	305350	84487	86646	129270	108550	85282	123080	285460	335880	160670	96345	78107	85767
MA10107783	8	C10H8O5	3-[(1-Carboxyvinyl)oxy]benzoic acid	Phenolic acids	Phenolic acids	16929-37-6	2	14513	12246	22896	61127	62664	75138	24727	21558	29424	209230	171940	211250	185990	195540	225630	173980	154350	203570
mws1014	12	C10H8O5	Fraxetin (7,8-Dihydroxy-6-methoxycoumarin)	Lignans and Coumarins	Coumarins	574-84-5	3	49638	42960	34282	101290	88306	188280	108550	30371	25089	96176	155250	177500	152260	88240	192740	97773	164400	175640
pmb2620	7	C11H12O4	3,4-Dimethoxycinnamic acid	Phenolic acids	Phenolic acids	14737-89-4	1	527900	704990	556610	663650	744820	602930	1213100	737350	558750	1867500	1518900	2154600	1081900	1164800	1066500	3257000	3183400	2427800
pme3443	5	C11H12O4	Sinapinaldehyde	Phenolic acids	Phenolic acids	4206-58-0	1	12209	11404	16215	10867	13641	15057	10406	6156.6	12387	8486.5	10116	17795	7924.7	41149	57799	8184.4	6920.9	4520.1
MWSmce083	7	C11H12O4	Ferulic acid methyl ester	Phenolic acids	Phenolic acids	2309-07-1	1	1137100	1561600	1252500	1471800	1531100	1283000	2709500	1562300	1278900	4046500	3494200	4546400	2302900	2631900	2278600	7064400	7168400	5448500
mws0853	6	C11H14O4	Sinapyl alcohol	Phenolic acids	Phenolic acids	537-33-7	3	2867.8	2817.2	5698.2	9225.2	8530.8	2271	4012	3962	1714.5	2832	2258	4013.5	2870.8	1236.5	2269.2	2270	2870.8	2299
Lmbn004790	6	C11H14O4	Methyl 3-(3-hydroxy-4-methoxyphenyl)propanoate	Phenolic acids	Phenolic acids	129150-61-4	3	1135.5	3956.8	2319.2	6883.5	6304	7408.2	2280	1765.2	2286	3946.2	564.5	6759	605	2812.8	2269.5	3956	571.25	1135
pme1675	2	C4H10N3O5P	Creatine Phosphate	Organic acids	Organic acids	67-07-2	3	18074	11651	12003	1886.3	3238.6	1563.2	6242.4	5065.9	7749.9	6870.1	14142	8571.9	2059.3	2254.6	4260.4	14605	17617	20941
mws0863	2	C5H11O7P	2-Deoxyribose-5'-phosphate	Nucleotides and derivatives	Nucleotides and derivatives	102916-66-5	3	11989	12417	14555	26973	9145.8	8462.4	20973	20271	18320	10262	17931	12514	10877	17405	5668.1	25056	38525	30004
pmb2507	7	C5H11O7P	2-Deoxyribose-1-phosphate	Nucleotides and derivatives	Nucleotides and derivatives	17210-42-3	3	155620	116480	134610	132700	162350	103040	168510	207190	286810	125600	200750	162030	227500	154540	205740	483630	752870	363320
mws0751	10	C13H26O2	Tridecanoic Acid	Lipids	Free fatty acids	638-53-9	1	3028.2	781.83	2703.1	985.94	1443.1	336.73	1756.3	686.28	1091.2	1698.1	1495.7	1030.8	2067.4	2123.5	1591.9	2310.1	3303.4	1645.1
pmb2873	5	C13H13NO2	3-(2-Naphthyl)-L-alanine	Amino acids and derivatives	Amino acids and derivatives	58438-03-2	3	49774	64968	68605	33134	41591	26353	44580	49454	64114	45758	51812	34676	63898	73666	77728	27080	60865	39570
pme0170	5	C8H16N4O3	N-Acetyl-L-Arginine	Amino acids and derivatives	Amino acids and derivatives	155-84-0	3	22098	27718	27809	38480	46169	34260	20069	23495	39380	19902	25124	39116	61476	54350	67605	33110	25266	30054
mws5045	7	C12H24O3	12-Hydroxydodecanoic acid	Lipids	Free fatty acids	505-95-3	1	4331.3	3847.1	6975	2086.8	1687	5460.1	8489.9	3662.3	3191.3	13861	6968.8	5649.4	1470	1039	3676.7	16874	8132	11311
Hmyp002656	8	C11H11NO4	Methyl dioxindole-3-acetate	Others	Others	57061-18-4	2	32544	18459	24784	14310	9157.3	31840	32469	20291	32842	53266	50227	58561	48137	50767	96371	34911	54073	54878
MWS4296	9	C11H14N2O3	Glycylphenylalanine	Amino acids and derivatives	Amino acids and derivatives	3321-03-7	1	1206400	1076600	1245900	830460	805360	735430	1379700	1659900	1858700	617040	604810	701520	672150	662790	635260	954990	696500	696610
mws5042	9	C11H14N2O3	L-Glycyl-L-phenylalanine	Amino acids and derivatives	Amino acids and derivatives	721-66-4	1	1151000	1067500	1317200	788450	801430	727890	1345900	1594500	1702700	670180	599850	712820	559370	664780	689630	1063500	610850	796690
mws0520	11	C11H13NO4	N-Acetyl-L-tyrosine	Amino acids and derivatives	Amino acids and derivatives	537-55-3	3	189320	278970	195180	401310	385710	485510	163620	206410	215580	249690	368890	416830	475760	451040	344640	152620	172790	132770
Zmln002252	10	C10H8O6	Sideretin (5,7,8-Trihydroxy-6-methoxycoumarin)	Lignans and Coumarins	Coumarins	-	3	87288	87671	78346	23207	36874	34274	54910	50610	68258	55783	66132	86102	112190	78855	69928	73407	57043	73888
mws4085	10	C11H12O5	Sinapic acid	Phenolic acids	Phenolic acids	530-59-6	2	73700	73825	94892	17004	19438	18760	70051	58065	62704	48035	46768	69562	122910	66689	55208	66446	46502	81817
MWStz170	11	C11H18N2O3	Cyclo(L-Leu-trans-4-hydroxy-L-Pro)	Amino acids and derivatives	Amino acids and derivatives	115006-86-5	3	16051	14231	6908	18564	22005	33036	8981.2	14951	19456	19567	22567	17619	25006	38294	26402	7676.2	18543	16283
pmb2643	7	C14H26O2	Myristoleic acid	Lipids	Free fatty acids	544-64-9	1	2308.1	2922.9	4087.3	2242.8	2429.9	2091.2	2547.2	2277.3	2568.9	5163.9	7207.1	3191.8	1857.6	1531.3	3856.7	6471.6	6875.1	8868.6
pme1194	1	C9H13N3O4	2'-Deoxycytidine	Nucleotides and derivatives	Nucleotides and derivatives	951-77-9	2	125520	126260	125600	74154	60150	57262	129580	147440	170290	83499	92988	169880	68978	77711	55995	113460	101540	119830
mws0119	7	C14H28O2	Myristic Acid	Lipids	Free fatty acids	544-63-8	1	13090000	9554800	11451000	11086000	11373000	12473000	19138000	20610000	20591000	33631000	28429000	30865000	13777000	13626000	16280000	25910000	32834000	31609000
pma6455	2	C5H11O8P	Ribulose-5-phosphate	Others	Saccharides and Alcohols	4300-28-1	3	74983	65549	106660	2725.8	2855	12124	106500	80742	107680	77569	92190	48248	1951.8	10158	12812	141720	67009	109440
Cmsn005615	2	C14H14O3	3,3',5-Trihydroxybibenzyl	Phenolic acids	Phenolic acids	86630-23-1	2	5471.5	5146.9	14180	1349.9	3179.1	4493.1	8773.6	3128.2	3388.5	10819	9213.5	5054.4	689.51	997.49	4950	10658	6347.1	10457
mws0474	7	C12H22O4	Dodecanedioic aicd	Lipids	Free fatty acids	693-23-2	1	7099.4	5071.8	8256.5	5416	6046.9	6297.2	5694.9	6766.6	4508.6	10230	11054	6743.4	5135.6	2587.1	5533.4	13423	10253	13007
pmb0962	11	C10H22N2O4	L-Lysine-Butanoic Acid	Amino acids and derivatives	Amino acids and derivatives	80407-71-2	3	1993000	2803100	4049400	8758500	6922400	6032100	2389100	2179500	2598300	2338000	2657900	3598600	7139400	8011900	5136200	1986400	1540600	1900200
Lmyn000160	5	C8H14O8	Mucic acid Dimethyl Ester	Phenolic acids	Phenolic acids	-	2	155970	146490	122470	216840	208430	191990	148370	162090	211270	137210	170780	117100	307470	243870	337390	220400	273330	223490
pmn001669	7	C12H14O5	Methyl sinapate	Phenolic acids	Phenolic acids	20733-94-2	3	2566.5	4596.3	3684.2	5023.1	4583.5	4749.5	8252.3	3662.2	4409.8	17670	20451	23898	9194.5	6973.7	9067	19498	25775	21336
mws1383	9	C12H10N4O2	Lumichrome	Alkaloids	Alkaloids	1086-80-2	3	228700	211430	212390	116760	79213	105940	98205	124080	131910	167060	76834	39861	55508	82024	74130	79943	61246	44564
MWS2430	7	C15H30O2	13-methylmyristic acid	Lipids	Free fatty acids	2485-71-4	1	78925	73692	87350	69748	79251	72494	62334	82853	99551	102020	127360	123210	69472	75352	91206	168310	172510	184570
mws0359	7	C15H30O2	Pentadecanoic Acid	Lipids	Free fatty acids	1002-84-2	1	162150	108630	175740	116360	124030	132860	151860	150970	191370	245040	215780	209270	123040	145900	175590	331810	377020	348420
ML10180524	11	C9H13N3O5	Cytarabine	Nucleotides and derivatives	Nucleotides and derivatives	147-94-4	1	2773700	4199000	3885800	17326000	13028000	11841000	3393800	4026900	4317500	3102900	3206500	5248900	12667000	9592900	7365700	3466700	2239300	2966400
pme3732	6	C9H13N3O5	Cytidine	Nucleotides and derivatives	Nucleotides and derivatives	65-46-3	1	1539800	2213200	2012500	9392200	7259000	7888800	1980700	2194100	2631900	1550100	1801100	2339100	7533000	4430600	4559900	1944600	1317900	1935500
pme2266	1	C10H16N2O3S	Biotin	Others	Vitamin	58-85-5	2	322370	273300	361380	141610	115840	121250	282840	344610	283250	243730	215140	145370	104350	109860	149430	322390	282990	311160
MWStz205	7	C14H16N2O2	Cyclo(D-Phe-L-Pro)	Amino acids and derivatives	Amino acids and derivatives	26488-24-4	3	3088.8	1765.7	3134	866.32	4400.2	1745	5303.4	3522.2	7480.1	11881	3993	10110	4435	5696.5	3063.6	8373.2	5257.8	16334
MWStz255	7	C14H16N2O2	Cyclo(Pro-Phe)	Amino acids and derivatives	Amino acids and derivatives	3705-26-8	3	2328.6	2758.2	5647.1	4623.8	1402.9	1376.6	3663.1	3725	6042.8	10592	5539.8	461.82	5599.6	3203.9	1137.5	6923.9	9652.2	10187
pmb2591	11	C13H14N2O3	N-Acetyl-L-Tryptophan	Amino acids and derivatives	Amino acids and derivatives	1218-34-4	1	10969000	10423000	11940000	35793000	32328000	33455000	10851000	10513000	16125000	17943000	23434000	27685000	39186000	38951000	28925000	20640000	15560000	19017000
mws0124	12	C13H14N2O3	N-(3-Indolylacetyl)-L-alanine	Amino acids and derivatives	Amino acids and derivatives	57105-39-2	2	15131	26812	33570	37815	68081	64490	32194	59499	16196	53479	15641	132230	52188	15174	24392	25364	22699	49770
Lmrj002087	9	C10H18N2O5	L-Isoleucyl-L-Aspartate	Amino acids and derivatives	Amino acids and derivatives	-	1	668950	581150	747720	589390	549230	498300	604260	834770	801320	317450	273760	339300	384480	363580	342350	504980	253340	410890
mws0655	7	C8H10NO6P	Pyridoxal-5'-phosphate	Others	Vitamin	54-47-7	3	68938	58247	58761	37201	28722	46680	126250	122840	91227	183160	262760	274870	55781	26847	41391	450890	427420	338100
Lmhn003373	10	C11H10O7	p-Hydroxybenzoylmalic acid	Phenolic acids	Phenolic acids	-	3	354400	540590	574570	217270	180930	230720	418240	525730	487640	586170	447600	613700	752840	555360	369780	960370	596740	618170
Hmbp003234	11	C12H14O6	1-O-Caffeoylglycerol	Lipids	Glycerol ester	-	3	18914	18949	26346	220160	177340	145880	24994	11870	42487	51264	56154	71105	151800	221290	180590	9328.6	39172	24872
mws0361	7	C16H30O2	Palmitoleic Acid	Lipids	Free fatty acids	373-49-9	1	12131	8712.8	18201	8496.8	7854	4353.7	10697	11668	10799	15565	30265	17817	8643.8	5569.9	10836	35302	27464	42178
Zmdn006929	7	C15H12O4	Aloe-Emodin-9-Anthrone	Quinones	Anthraquinone	6247-99-0	2	33467	50809	37374	32132	44482	30410	197340	92427	42669	210170	39493	28225	37333	26864	50886	29749	401720	29256
MWSHY0124	7	C15H12O4	Pinocembrin (Dihydrochrysin)	Flavonoids	Dihydroflavone	480-39-7	1	55116	94801	64498	62967	76134	53192	368500	175690	82666	430490	75028	47415	74183	51232	99257	56105	713250	52563
mws0120	1	C8H20NO6P	Choline Alfoscerate	Lipids	PC	28319-77-9	1	95297	110970	171750	3899.8	7775.8	8315.7	114690	277600	178360	32872	11879	13860	11037	5079.7	20223	185030	188240	173190
pme1187	5	C10H14N2O6	5-Methyluridine	Nucleotides and derivatives	Nucleotides and derivatives	1463-10-1	3	5694.5	4972	7423.6	3636.3	2449.8	6340.6	2979.2	6475.3	5876.1	4009.4	6267.7	5292.5	9178.6	10526	5564.8	5802.6	870.36	4820.7
Zmyn000110	2	C6H14NO8P	D-Glucosamine 1-phosphate	Others	Saccharides and Alcohols	2152-75-2	3	27641	14529	13178	2501.3	8314.5	2854.9	12115	34084	29853	6039.6	7813	3011.6	1783.8	3548.4	4971.1	42863	42153	32696
mws1090	2	C6H13O9P	Glucose-1-phosphate*	Others	Saccharides and Alcohols	59-56-3	1	2469700	1620000	1707600	128700	87409	109230	2657500	1771600	2911800	2909400	3012800	1805500	124480	228590	539660	4688500	6814700	6168300
mws0866	2	C6H13O9P	D-Glucose 6-phosphate*	Others	Saccharides and Alcohols	56-73-5	1	2680700	1542300	1516200	104850	77821	107460	2818600	2130600	2932800	2956900	3062300	1787300	115030	225300	535320	5284600	6847300	6450800
MWS2442	2	C6H13O9P	D-Fructose 6-Phosphate	Others	Saccharides and Alcohols	643-13-0	1	1499700	950860	1000200	71693	46306	64318	1653700	1347300	1715900	1677900	1738200	1097400	70565	126600	314100	3027700	4035900	3569700
Zmpn000095	2	C6H15O9P	Sorbitol-6-phosphate	Others	Saccharides and Alcohols	20479-58-7	3	25769	18554	9241	8877.8	8899.2	5351.8	26752	23354	26231	28468	29848	19856	2638.4	6732	2608.2	35862	43681	46325
mws0715	6	C13H16N2O4	Phenylacetyl-L-glutamine	Amino acids and derivatives	Amino acids and derivatives	28047-15-6	1	43452	63556	46820	139890	171610	129820	35171	51429	56320	10921	5686.7	13395	22907	41896	64503	7255.7	16405	14566
pme0230	4	C10H13N5O4	Adenosine	Nucleotides and derivatives	Nucleotides and derivatives	58-61-7	1	17604000	20317000	20238000	22743000	20881000	21514000	20321000	21528000	23173000	14591000	18561000	17945000	7923600	6731500	10618000	15679000	14375000	14635000
pma2172	7	C17H17NO2	Cinnamoyltyramine	Alkaloids	Phenolamine	20384-14-9	3	558.9	9027.2	826.63	1274.7	1483.8	1367.9	17431	7699	10634	6203.4	4558.4	66103	9595.7	650.31	2942.7	52134	6804.5	12025
mws1060	3	C10H12N4O5	9-(Arabinosyl)hypoxanthine	Nucleotides and derivatives	Nucleotides and derivatives	7013-16-3	1	2436200	3261100	3561700	825740	788660	770270	3672000	2156000	1741900	4028600	2841000	2770500	918320	1055000	1348800	2379200	2028700	2120100
pme1119	3	C10H12N4O5	Inosine	Nucleotides and derivatives	Nucleotides and derivatives	58-63-9	3	547580	595460	548910	422550	323440	262460	685330	376450	329530	595700	558590	433340	166790	131930	184570	405930	417090	398090
pmp000087	11	C13H16O6	2-Feruloyl-sn-glycerol	Phenolic acids	Phenolic acids	-	1	1412600	1646700	2379400	9732500	6242800	10226000	2364600	2488400	2796900	6831300	7362700	9582700	11512000	15621000	11716000	3892700	4586200	4490800
pmp000086	5	C13H16O6	1-Feruloyl-sn-glycerol	Phenolic acids	Phenolic acids	-	2	1598100	2265600	2295800	6913400	7442700	10243000	2865700	2565500	2675300	5303800	7187000	11211000	16490000	14555000	11992000	3773300	4375200	3440500
mws0383	2	C17H32O2	10-Heptadecenoic Acid	Lipids	Free fatty acids	29743-97-3	1	558140	490760	606010	466260	265170	401200	507210	526880	723880	650270	649460	431780	378960	400510	533250	1036100	939420	1282400
mws1659	5	C15H10O5	Emodin	Quinones	Anthraquinone	518-82-1	2	262.38	37.36	224.96	187.7	515.96	168	169.24	592.16	262.44	896.1	75.08	52.62	633.66	262.38	337.54	165.06	261.84	131.62
mws1175	7	C16H14O4	Pinostrobin	Flavonoids	Dihydroflavone	480-37-5	3	73656	74763	42506	34974	47875	41088	261730	153620	65337	540540	68241	48633	53551	37968	86503	47347	571310	43269
mws1297	4	C13H18O6	Benzyl glucoside	Phenolic acids	Phenolic acids	4304-12-5	1	58632	67095	65073	82294	78802	73337	56782	54886	65174	27853	28619	27924	50346	57584	40597	23503	21781	23630
MWS20159	9	C13H18O6	Phenyl-β-D-glucoside	Others	Others	-	3	61481	86006	72723	64526	44585	43151	62165	67246	78498	25464	27423	22536	24537	39920	37111	21368	20162	23264
pme0376	5	C15H12O5	Naringenin (5,7,4'-Trihydroxyflavanone)*	Flavonoids	Dihydroflavone	480-41-1	2	63525	85294	79809	86162	120480	116940	126220	73269	81570	79320	64000	93721	123140	139060	163380	57448	100910	49015
mws0914	5	C15H12O5	Pinobanksin*	Flavonoids	Dihydroflavonol	548-82-3	2	51857	79875	67642	73354	93123	95720	106500	80290	77280	62960	61876	73983	105000	122070	131260	43748	90689	41141
MWSslk154	3	C12H20O7	Triethyl citrate	Organic acids	Organic acids	77-93-0	3	33777	35076	32057	24758	30445	27568	39199	49325	44300	62474	51643	53186	26008	24800	26993	52202	45413	50056
pmb1574	1	C18H28O2	9,12-Octadecadien-6-Ynoic Acid	Lipids	Free fatty acids	61481-29-6	3	587490	737500	1547000	192080	199130	245890	1089400	999170	1505000	327300	299910	469690	314260	195910	217620	793020	328310	446600
mws1038	11	C11H22N2O4S	Pantetheine	Others	Others	496-65-1	1	5419.7	3234.6	7637.4	56780	49321	26321	2578.5	5260.7	5807.3	3655.7	7031.2	7611.8	37176	30779	23265	2167.5	1804.4	7633.9
pmb0889	9	C18H30O2	Punicic acid (9Z,11E,13Z-octadecatrienoic acid)	Lipids	Free fatty acids	544-72-9	1	4429800	4649800	5084200	1934100	1872700	2297900	5468400	5873900	7076500	1787000	2578900	2342500	2532700	2173300	2474700	2671100	2418200	2823600
pmp001245	5	C15H22NO4+	Feruloylcholine	Alkaloids	Phenolamine	85927-25-9	1	378080	402430	309040	897250	1025400	904120	289440	157130	275620	574080	2392900	1172700	8363700	1560900	3011000	637560	1521300	916930
MWS4354	11	C11H15N5O4	N6-methyladenosine	Nucleotides and derivatives	Nucleotides and derivatives	1867-73-8	1	155220	247870	244700	1214500	1126900	968270	181540	171220	176010	188740	162300	220510	1198400	902830	903860	178360	89713	146290
Hmhp001812	11	C11H15N5O4	2'-O-Methyladenosine	Nucleotides and derivatives	Nucleotides and derivatives	2140-79-6	1	162420	212970	212350	1127700	872250	767320	188610	250120	240880	240430	250660	313650	882130	767040	648090	168540	85140	160890
Lmcp005230	7	C17H14O4	6-Hydroxy-2-[2-(4-hydroxyphenyl)ethyl]chromone	Others	Others	-	3	5918.1	14975	6727.8	9611.9	10259	11493	10994	11012	10042	40512	32155	38854	14052	18991	18707	29275	39984	36803
Lmyn012331	2	C18H34O2	Petroselinic acid	Lipids	Free fatty acids	593-39-5	2	4563500	3560100	3407500	2730000	2819200	2862800	3113800	3838900	5334600	3149100	3008500	2983900	1923400	2108900	2675300	4842100	4677700	5642200
mws2623	2	C18H34O2	11-Octadecanoic acid(Vaccenic acid)	Lipids	Free fatty acids	506-17-2	1	4883900	3846500	4195000	3187000	3136600	3396200	4523400	4410800	5001700	3757300	3765400	3278300	2115300	2411900	2822700	6403800	6094100	6572100
Hmqp002567	7	C17H17NO3	P-Hydroxycinnamic acid p-hydroxyphenethylamine	Phenolic acids	Phenolic acids	-	1	9352	17307	11455	63070	119760	9096.9	29647	32450	116800	23520	58989	684300	49230	11689	14976	556330	22536	44283
MWSmce089	7	C17H17NO3	p-Coumaroyltyramine	Lignans and Coumarins	Coumarins	36417-86-4	1	10920	20298	7461.9	59760	107880	4370.8	28757	29088	101620	18808	55011	701430	55152	9995.1	16487	542950	20231	45135
Zmwp005562	7	C17H17NO3	cis-N-p-Coumaroyltyramine	Alkaloids	Phenolamine	-	1	7508.7	19351	14266	59411	114500	5556	27294	30129	109590	20241	53888	643100	44868	10355	15800	535170	20382	35441
mws0129	2	C16H12O5	Genkwanin (Apigenin 7-methyl ether)	Flavonoids	Flavonoid	437-64-9	1	6647.2	4229.1	1747.4	5944.7	514.28	3120.9	6167.7	5597.1	3614.3	3436.5	854.22	4313.7	3711	2676.8	2670.3	6437.3	13861	3756.4
mws0668	10	C10H12N4O6	Xanthosine	Nucleotides and derivatives	Nucleotides and derivatives	146-80-5	1	3008400	3552700	4953900	1792900	1616600	1980500	4302300	2879900	2240100	5629200	4182400	4259200	3492500	3946700	3047800	5152600	3130900	3980500
mws1068	9	C15H10O6	Kaempferol (3,5,7,4'-Tetrahydroxyflavone)	Flavonoids	Flavonols	520-18-3	1	1616000	2265000	3040600	1490600	1617300	1900600	2774700	3000900	2499100	499910	482440	777070	1053400	845860	872920	622580	566940	584780
Zmzp006523	9	C15H10O6	6-Demethoxycapillarisin	Others	Others	61854-36-2	3	8020.7	10082	13224	8218.7	6103.2	7386.5	9704.2	12913	11593	3225.7	1474.8	1707.4	4420	3520	6022.5	4082.6	3186.4	2670.6
mws1521	5	C13H18O7	Salicin	Phenolic acids	Phenolic acids	138-52-3	3	74015	45536	48575	85058	117980	158010	65633	66386	57098	184700	186890	169030	505920	563970	307500	146120	171520	170840
mws1436	7	C18H38O2	1,18-Octadecanediol	Lipids	Free fatty acids	3155-43-9	2	6085.7	7112.8	5243.4	34343	71110	28592	72807	66297	54928	93349	51232	75767	4665.4	5161.4	4172.6	55468	47993	98758
mws1094	9	C15H12O6	Aromadendrin (Dihydrokaempferol)	Flavonoids	Dihydroflavonol	480-20-6	2	21879	41098	39518	25692	23400	26761	38960	32823	28801	6866.4	9480.8	7228.7	11102	10614	10707	7998.8	9348	5486.4
mws0064	8	C15H12O6	Eriodictyol (5,7,3',4'-Tetrahydroxyflavanone)	Flavonoids	Dihydroflavone	552-58-9	3	1988.9	2957.8	1865.8	3684.5	3075.5	1732.2	9955.1	4161.3	1743.6	11917	6736.9	10189	13512	14255	16351	7664.6	11382	6687.1
pme3163	2	C7H15O10P	D-Sedoheptuiose 7-phosphate	Others	Saccharides and Alcohols	2646-35-7	3	818570	621740	722300	224710	162640	167130	1128600	850670	1073700	452060	584030	726500	250850	130200	211410	1342300	1843100	1382300
pmb2657	2	C10H18N4O6	Argininosuccinic acid	Organic acids	Organic acids	2387-71-5	3	219320	133680	179580	13991	5960.4	9506.6	323680	247850	227100	149750	151730	92321	11902	12643	47001	378590	348290	360880
Zmyn004548	9	C18H28O3	12-Oxo-phytodienoic acid	Lipids	Free fatty acids	85551-10-6	1	10774	9379.7	11880	12645	8043.2	9894.3	17387	18135	30964	6265.2	11802	8489.2	9745.6	5770.8	13541	9071.1	13168	9584.6
MWSmce689	9	C19H32O2	Methyl linolenate	Lipids	Free fatty acids	301-00-8	2	73762	82468	98257	60156	48736	58862	75843	81260	130970	18219	22577	14180	7966.3	10468	14447	22803	18450	21789
Zmpn003368	9	C18H30O3	13S-Hydroxy-9Z,11E,15Z-octadecatrienoic acid	Lipids	Free fatty acids	87984-82-5	1	352870	375940	509010	361860	302680	312730	540410	522990	816660	160950	268610	168700	180150	113570	251320	223280	232020	204280
pmb2786	9	C18H30O3	9-Hydroxy-10,12,15-octadecatrienoic acid*	Lipids	Free fatty acids	89886-42-0	3	26759	25244	25644	21431	22128	29189	38099	42402	64234	12921	24485	14605	28128	18739	43796	20603	23506	18286
Zmyn004732	1	C18H30O3	2R-hydroxy-9Z,12Z,15Z-octadecatrienoic acid	Lipids	Free fatty acids	-	3	29742	28377	35953	11628	17153	15215	35406	46432	42034	21574	17960	15656	13136	12414	11952	32014	26549	26660
Zmyn004676	9	C18H30O3	17-Hydroxylinolenic acid	Lipids	Free fatty acids	-	1	1286400	1303100	1473200	475930	549960	545730	1479400	1675200	1945400	355270	648980	597540	685590	512870	685320	587730	536890	574440
pmb2787	9	C18H30O3	9-Oxo-10E,12Z-octadecadienoic acid	Lipids	Free fatty acids	54232-59-6	3	63824	67341	77822	37689	39655	46546	86131	102350	143940	27270	37096	33107	58147	34329	69377	32026	42670	42267
Lmbn005443	9	C18H30O3	13-KODE; (9Z,11E)-13-Oxooctadeca-9,11-dienoic acid*	Lipids	Free fatty acids	54739-30-9	3	25741	25442	30239	22046	22705	26748	34747	38302	58740	14868	22617	18395	27425	21022	36458	18029	24464	22983
Lmcn009539	2	C19H34O2	E,E,Z-1,3,12-Nonadecatriene-5,14-diol	Lipids	Free fatty acids	-	1	12979	10335	11309	5333.1	6723.3	7447.8	9829.8	10209	19090	7473.3	12513	9228.4	3803.3	6644.1	10803	9749.2	16658	17028
Lmcp007250	11	C18H16O4	5-Hydroxy-6-methoxy-2-(2-phenylethyl)chromone	Others	Others	-	3	4120.7	4689.2	2096.2	10289	10786	13450	2165.3	3215.6	5560	7752.6	11545	5354.3	12986	8596.6	13612	6495.1	10391	9754.1
Rfmb091	9	C18H32O3	9S-Hydroxy-10E,12Z-octadecadienoic acid*	Lipids	Free fatty acids	15514-85-9	1	3097000	2797000	3454300	1215600	1353200	1423100	3255100	3657000	4209900	981580	1456000	1492700	1578600	1253200	1504900	1558900	1390300	1556800
Lmbn005662	9	C18H32O3	9(10)-EpOME;(9R,10S)-(12Z)-9,10-Epoxyoctadecenoic acid	Lipids	Free fatty acids	16833-56-0	1	136430	124420	182140	65879	72078	39668	155920	180580	284140	48171	64844	64665	103460	101050	165410	79013	77702	91208
Lmbn005369	9	C18H32O3	13(S)-HODE;13(S)-Hydroxyoctadeca-9Z,11E-dienoic acid*	Lipids	Free fatty acids	10219-69-9	1	3062800	2742100	3334800	1182800	1234700	1345400	3328300	3604500	4242300	919420	1436800	1449600	1549700	1119300	1441700	1518100	1309500	1456300
pmb0197	6	C11H15N5O5	N7-Methylguanosine	Nucleotides and derivatives	Nucleotides and derivatives	20244-86-4	3	46707	55109	80093	443560	276410	208880	43281	48469	77460	52090	61839	83246	213990	172910	117970	38544	36890	42485
Lmbn009444	9	C18H34O3	Ricinoleic acid	Lipids	Free fatty acids	141-22-0	2	170380	184390	180190	99479	110850	116490	223060	232900	214600	109640	123020	135740	99950	102670	135800	118180	139010	99422
mws0724	6	C10H13N5O6	8-Hydroxyguanosine	Nucleotides and derivatives	Nucleotides and derivatives	3868-31-3	2	57386	75356	57841	109820	103280	78167	47361	47969	77230	43438	48618	45293	55358	96391	74661	37399	28700	32222
ML10195036	12	C18H37NO2	3-Dehydrosphinganine	Lipids	Sphingolipids	16105-69-4	3	3273.6	5189.3	5804.5	10000	6418.8	11861	5172.4	5511.9	9002	10838	9874.7	10959	14332	9487.1	9260.2	4876.7	7354.1	7569.2
MWSHY0126	5	C16H12O6	Kaempferide (3,5,7-Trihydroxy-4'-methoxyflavone)	Flavonoids	Flavonols	491-54-3	2	247.51	309.31	308.98	235.46	320.81	747.74	410.35	240.54	415.34	1291.1	322.9	1229	2993.5	2025.1	810.46	901.01	804.94	322.34
pmp000971	5	C16H12O6	6-Demethoxy-7-methylcapillarisin	Others	Others	-	2	2589.9	9016.7	5672.6	3898.9	7330.4	7916.5	7458	2477	4116.2	29335	11626	41054	213220	98972	63564	72600	22468	13272
pmp000001	4	C16H12O6	Hispidulin (5,7,4'-Trihydroxy-6-methoxyflavone)*	Flavonoids	Flavonoid	1447-88-7	3	23719	75326	54586	84961	135800	101030	87911	118740	32965	17417	6841.6	31714	10042	13518	11331	7639.3	6187.8	12059
pmp001127	9	C16H12O6	Chrysoeriol	Flavonoids	Flavonoid	491-71-4	2	12110	30710	33427	11698	8399.6	13547	22611	10476	28367	395.74	218.13	3073.9	693.17	859.28	477.33	220.24	433.53	1199.6
mws0058	5	C16H12O6	Diosmetin (5,7,3'-Trihydroxy-4'-methoxyflavone)*	Flavonoids	Dihydroflavone	520-34-3	3	23310	12643	11073	18578	24993	18816	20886	14890	13728	13311	14836	30783	49221	34928	35106	14890	22030	13453
Zmhp003514	9	C16H12O6	6,7,8-Tetrahydroxy-5-methoxyflavone	Flavonoids	Flavonoid	-	2	10993	30988	31711	11329	10343	8963.4	23299	10439	27787	187.52	1021.8	4195.9	457.51	1676.1	461.56	562.4	740.55	908.72
Zmhn001358	8	C13H16O8	4-O-Glucosyl-4-hydroxybenzoic acid	Phenolic acids	Phenolic acids	-	1	80156	112720	92551	131740	115740	141770	171810	137850	144070	223650	251620	294520	398550	469390	415600	250140	263520	254160
Lmsn002247	8	C13H16O8	1-O-Salicyloyl-β-D-glucose	Phenolic acids	Phenolic acids	60517-74-0	1	91161	112490	105150	152040	154940	146520	169740	140170	126880	256470	241030	290080	436050	460560	469100	270460	277260	274650
pmb3142	5	C13H16O8	Salicylic acid-2-O-glucoside	Phenolic acids	Phenolic acids	10366-91-3	3	3441400	4115500	4309800	7516500	6620600	6899100	4516700	4661700	4751400	4259500	4905700	4403100	10850000	10739000	9800800	4991800	5197200	5000600
pmb3079	2	C8H16NO9P	N-Acetyl-D-glucosamine-1-phosphate	Others	Saccharides and Alcohols	6866-69-9	3	74709	41455	50371	2849.8	5364	6954.8	85085	77007	88270	65378	88742	62392	1513	1794	10517	119660	163890	119710
pme2954	8	C15H10O7	Quercetin	Flavonoids	Flavonols	117-39-5	1	273250	74940	67747	107980	195130	257310	250450	132660	95860	1152500	824280	1732000	2137500	1919200	1837900	1556700	1278900	1308600
mws0920	9	C15H10O7	Tricetin (5,7,3',4',5'-Pentahydroxyflavone)	Flavonoids	Flavonoid	520-31-0	2	35211	3323.2	2760.3	18134	12291	8211	33472	65761	1918	821.21	647.28	3118.9	3240.7	6219.6	5224.3	2684.4	5991.9	6467.2
Cmsp004086	8	C16H14O6	Dihydrokaempferide	Flavonoids	Dihydroflavonol	137225-59-3	3	27313	17177	6558.8	52061	65446	63639	43004	2920	28519	206060	162190	135350	379260	341280	208230	194370	138940	137410
Hmdn001963	8	C14H10O8	Methyl Brevifolincarboxylate	Phenolic acids	Phenolic acids	154702-76-8	3	6069.2	1027.5	505.5	6629.8	2562	10695	5065.8	2583.2	520.75	14894	20390	20374	28522	25955	38467	21397	23474	23892
pmn001610	7	C20H36O2	Eicosadienoic acid	Lipids	Free fatty acids	5598-38-9	1	19871	22688	11551	23774	27006	17315	35091	34381	45714	65185	59502	48110	50059	48798	48255	116590	90322	149310
Zmzn003953	7	C18H30O4	13(s)-hydroperoxy-(9z,11e,15z)-octadecatrienoic acid	Lipids	Free fatty acids	67597-26-6	3	230300	162960	199290	200960	259030	244600	319620	332660	333110	637620	485360	590670	260010	229580	306750	433550	541990	541360
Zmyn004449	4	C18H30O4	9-Hydroxy-12-oxo-10(E),15(Z)-octadecadienoic acid	Lipids	Free fatty acids	-	2	3234.9	2535.2	3818.1	2090.4	3872.7	2512.3	2139.2	3222.2	2671.9	1774.9	2233.7	1343	888.09	223.51	1832.8	1359.9	2089.6	1153.6
Hmqp006221	4	C19H34O3	13-Hydroxy-9Z,11E-octadecadienoic acid	Lipids	Free fatty acids	18104-45-5	3	381.23	329.34	407.77	258.83	270.92	557.73	191.26	419.93	617.54	51.49	206.82	163.79	224.37	404.74	62.06	130.35	198.98	168.24
pmn001606	3	C20H38O2	Eicosenoic acid	Lipids	Free fatty acids	26764-41-0	2	681280	808190	591200	1034400	484710	466710	1584100	576580	637550	1623700	525920	710510	395180	321610	339190	413410	732850	1043700
pme3967	6	C12H17N5O5	2-(Dimethylamino)guanosine	Nucleotides and derivatives	Nucleotides and derivatives	2140-67-2	1	143480	193330	205510	551980	426770	322950	156860	187820	168480	232820	186010	344530	359400	300780	228130	175270	115000	150820
Lmcp002302	6	C12H17N5O5	N6-(2-Hydroxyethyl)adenosine	Nucleotides and derivatives	Nucleotides and derivatives	4338-48-1	1	167630	197440	222310	563790	450380	342730	165330	193410	206970	251760	198450	322420	414920	293850	246510	177500	132240	141590
MWSHY0047	12	C18H16O5	5,7,4'-Trimethoxyflavone	Flavonoids	Flavonoid	5631-70-9	2	438.99	244.49	177.87	351.59	868.3	613.91	298.85	333.97	254.79	347.96	321.68	1365.2	336.76	527.73	256.16	310.59	624.72	351.77
Lmcp005089	1	C18H16O5	6,8-Dihydroxy-2-[2-(4-methoxyphenyl)ethyl]chromone	Others	Others	-	3	3603.6	24507	4171.3	1664.3	3110.5	3182.6	5537.3	7893.2	109590	2815.7	3062.1	18803	2716.6	1452	1178.7	17657	6642.6	6132.9
mws0636	6	C18H20N2O3	L-Phenylalanyl-L-phenylalanine	Amino acids and derivatives	Amino acids and derivatives	2577-40-4	1	46908	51012	60628	135620	103350	96713	34397	45520	39556	64955	30039	51608	63808	95780	73874	66176	32049	59054
pmb2804	1	C18H32O4	13S-Hydroperoxy-9Z,11E-octadecadienoic acid	Lipids	Free fatty acids	33964-75-9	3	95002	107670	102540	43263	52297	50334	134730	150770	168780	45506	66056	73203	83624	56347	72696	77286	72725	67434
pmn001689	11	C18H32O4	9-Hydroxy-12-oxo-15(Z)-octadecenoic acid	Lipids	Free fatty acids	-	2	84614	88544	88167	171540	166000	171060	112930	122430	152860	77141	94444	145460	176780	174650	188490	71182	74985	69258
Rfmb087	1	C18H32O4	9-Hydroxy-13-oxo-10-octadecenoic Acid	Lipids	Free fatty acids	-	1	172150	179890	174900	49855	53678	63593	205120	214720	159400	102870	112360	142180	76561	75422	67898	165370	97582	134090
pmf0397	1	C20H40O2	Arachidic acid	Lipids	Free fatty acids	506-30-9	3	22945	23316	18251	14910	9072.3	12031	21008	13715	18327	8586.9	3958.4	10592	10919	13748	21356	19294	16237	22716
Lmyp001375	4	C13H15NO8	BOA-6-O-glucoside	Alkaloids	Alkaloids	-	2	86261	38974	43614	71732	70000	66358	105130	29510	41662	53525	58389	51629	27553	27962	37769	30276	38033	38529
mws1174	7	C17H14O6	3-O-Acetylpinobanksin	Flavonoids	Dihydroflavonol	52117-69-8	1	156390	228120	170220	143150	198180	114340	845300	484160	291380	1287900	210980	114970	178500	104710	296320	135050	1992600	168730
Lmbn005822	5	C18H34O4	9,10-DHOME; (12Z)-9,10-Dihydroxyoctadec-12-enoic acid	Lipids	Free fatty acids	263399-34-4	3	628.56	1140.5	1275.5	357.67	85.145	756.07	171.78	268.51	734.87	484.36	652.82	473.93	1685.6	1517.7	841.3	417.57	189.49	1005.5
Lmbn007891	5	C18H34O4	Hydroxy ricinoleic acid	Lipids	Free fatty acids	-	3	54566	50749	64552	58314	65645	54839	52905	65783	76722	39940	39567	72863	77036	89506	83085	35981	29368	32531
Lmqn004838	8	C15H8O8	3-O-Methylellagic acid	Tannins	Tannin	-	2	1787.2	445.68	678.07	567	891.97	820.21	894.22	560.66	452.3	4245.8	3899.7	5875.7	4471.8	6250.6	1349.3	3908.4	1886.5	10161
Zmzp004111	5	C16H12O7	Selagin	Flavonoids	Flavonoid	-	2	5916.5	20784	15210	17687	13468	30270	14448	22908	14637	50318	32473	97422	183660	357460	730680	91208	59106	71515
mws0988	12	C16H12O7	Rhamnetin	Flavonoids	Flavonols	90-19-7	1	7132.7	6492.4	3112.2	7658.4	16670	19513	22299	10817	3974.7	54887	8267.1	108640	25589	11646	4845.3	3533.6	31941	31985
MWSHY0068	8	C16H12O7	Isorhamnetin	Flavonoids	Flavonols	480-19-3	1	80667	17510	16062	35232	70418	109760	55719	29528	27658	352980	305160	662340	1098300	1070900	577230	458300	344840	352190
Zmzp006646	8	C16H12O7	Capillarisin	Others	Others	56365-38-9	1	450170	112640	107210	220670	407140	736100	343930	183650	183700	2035000	1833600	3805600	6207900	6510200	3498200	2733300	2101000	2131400
Lmmn004912	8	C16H12O7	3-O-Methylquercetin	Flavonoids	Flavonols	1486-70-0	2	8988.2	6506.4	7925.7	11158	12422	12788	10977	11737	7685.4	19240	18002	27818	19143	23249	19538	19057	20266	17445
Lmfp001509	8	C13H16O9	1-O-Galloyl-rhamnose	Tannins	Tannin	-	3	13112	9190.9	2036.7	9089.8	13285	6351.1	10118	8069.9	10166	29799	34199	33254	31372	61766	26312	52812	86344	59421
pmn001367	11	C13H16O9	Protocatechuic acid-4-O-glucoside*	Phenolic acids	Phenolic acids	-	1	354830	152530	78847	293530	309630	262810	237350	203070	149220	63619	164130	292100	354240	230730	400740	140440	84736	232570
Hmtn001120	11	C14H20O8	5-(2-Hydroxyethyl)-2-O-glucosylphenol	Phenolic acids	Phenolic acids	-	1	284840	309570	326510	1234800	1287300	941440	322420	320100	289070	425590	357200	390040	1443200	1616900	942080	210360	293820	237060
mws0582	7	C11H19N3O6S	S-(Methyl)glutathione	Amino acids and derivatives	Amino acids and derivatives	2922-56-7	1	34187	47499	60226	62721	79460	60584	54979	50560	54284	53128	69944	72275	30183	23033	26550	64129	108360	86987
MWSslk257	11	C9H14N3O8P	Cytidine 5'-monophosphate(Cytidylic acid)	Nucleotides and derivatives	Nucleotides and derivatives	63-37-6	3	189740	290890	268990	638640	691430	1074400	241680	264850	203380	213180	264570	464180	806040	697980	821760	202080	156300	257350
pme3188	11	C9H13N2O9P	Uridine 5'-monophosphate	Nucleotides and derivatives	Nucleotides and derivatives	58-97-9	1	849270	2667600	2229900	4401500	4170600	5483500	1330400	1009600	1317200	1213100	2471000	3646000	3899900	5128300	5890500	493510	272910	321340
Lmsn003111	8	C15H18O8	1-O-p-Coumaroyl-β-D-glucose	Phenolic acids	Phenolic acids	7139-64-2	1	1214600	1585300	1086900	4088300	5968400	2828200	2284500	1366800	1589300	4826300	3330900	4643300	8105200	6887300	7516800	4704200	5636800	3864400
Lmqn000351	6	C12H22O10	Rutinose	Others	Saccharides and Alcohols	90-74-4	3	106210	208770	159350	159840	134140	179890	134080	113730	76308	148120	117190	129080	125090	152780	111380	61738	38312	58778
MWSmce278	5	C21H26O3	Acitretin	Others	Vitamin	55079-83-9	2	9314.8	4849.1	3495.9	5601.6	7272	6139.9	4837	6624.5	7734.9	5630.4	6934.3	4858.6	7978.2	17224	12061	6671.7	6722.1	3886.8
pmn001690	9	C16H24O7	3-Hydroxy-4-isopropylbenzylalcohol-3-O-glucoside	Phenolic acids	Phenolic acids	-	2	161500	209720	219230	105110	133150	143700	167530	205350	197670	126590	104630	114400	66846	81141	71694	106200	79597	85426
pmn001691	1	C18H32O5	9,12,13-Trihydroxy-10,15-octadecadienoic acid	Lipids	Free fatty acids	-	1	1070200	1077100	1116400	237860	272080	344080	1606900	1939000	2400100	767820	766380	672110	676740	515160	910020	1270300	981460	1026300
mws0371	7	C22H32O2	Cis-4,7,10,13,16,19-Docosahexaenoic Acid	Lipids	Free fatty acids	6217-54-5	3	1683.7	1316.6	3329.9	1204.9	1083.7	2277.4	2796.1	2846.2	2826.5	2879.5	5298.3	3548.8	1582.9	1553	2197.7	4685.6	4502.8	4478.9
mws0884	4	C10H12N5O6P	Cyclic 3',5'-Adenylic acid	Nucleotides and derivatives	Nucleotides and derivatives	60-92-4	1	1278000	1405600	1445700	1453300	1345400	1473200	1454700	1561100	1585700	1093200	1348600	1267500	607000	535190	864540	1245400	1135700	1123300
Zmlp005013	10	C16H10O8	3,3'-O-Dimethylellagic Acid	Tannins	Tannin	2239-88-5	3	5477.4	6331.1	6678.3	3363.3	5538.6	3094	9769.8	6199.2	10692	9475.5	7525.6	9927.7	8253.3	7824.6	6968.4	7822.7	9929.8	8758.4
Lmtn002565	11	C14H18O9	1-O-Vanilloyl-D-Glucose	Phenolic acids	Phenolic acids	-	1	198090	256120	229270	355270	309450	367880	245950	203270	237810	221360	173470	300480	454740	424800	523600	213440	181750	196480
Zmhn001883	8	C14H18O9	Vanillic acid-4-O-glucoside	Phenolic acids	Phenolic acids	32142-31-7	1	31449	29836	27120	25898	27866	24066	39231	34058	32754	73453	110450	56615	82058	70798	67286	95752	88561	105760
Hmqn003054	1	C18H34O5	9,10,11-Trihydroxy-12-octadecenoic acid	Lipids	Free fatty acids	61911-67-9	1	372440	338410	375350	89973	92048	101460	447210	499410	554120	191910	207080	227710	193960	143500	189280	285210	259860	305200
Lmbn004240	4	C18H34O5	9,10-Dihydroxy-12,13-epoxyoctadecanoic acid	Lipids	Free fatty acids	-	2	8758.4	4775.6	4702.1	14352	7811.9	7455.8	5177.7	6741.2	10250	1465.3	1345.1	603.84	2600.5	2666.6	3524	1107.3	278.66	1863.2
pmn001694	1	C18H34O5	9,10,13-Trihydroxy-11-Octadecenoic Acid	Lipids	Free fatty acids	29907-57-1	1	6518700	5893300	6371200	1396900	1516600	1640100	6878400	8800200	8960100	3389600	3488700	3683600	3135800	2290300	3114500	4764600	4227300	5293100
Lmbn003970	9	C18H34O5	9,12,13-TriHOME; 9(S),12(S),13(S)-Trihydroxy-10(E)-octadecenoic acid	Lipids	Free fatty acids	97134-11-7	2	115930	143180	171050	91338	72357	74824	165430	226190	249550	50550	61338	72907	97391	67806	95341	71970	53591	50922
pme3184	2	C10H14N5O6P	2'-Deoxyadenosine-5'-monophosphate	Nucleotides and derivatives	Nucleotides and derivatives	653-63-4	2	271640	232050	265620	106820	104600	107090	265440	272840	298710	173210	247340	215140	96997	117260	97542	275150	367520	259180
MWS2426	1	C16H19N3O5	Tryptophan glutamic acid	Amino acids and derivatives	Amino acids and derivatives	36099-95-3	3	22639	26876	30012	16051	10942	13582	24140	35143	32908	13333	13861	21064	16822	9433.7	17317	37201	16208	32018
MWStz294	6	C20H20N2O3	N-Feruloyltryptamine	Alkaloids	Plumerane	53905-13-8	1	110000	150850	159790	1632300	1002900	629420	217660	157740	237870	85402	378490	641890	1126800	393200	428170	395950	468160	85878
MWS2673	11	C20H34O4	5,6-DiHETrE [5,6-dihydroxy-8Z,11Z,14Z-eicosatrienoic acid]	Lipids	Free fatty acids	213382-49-1	3	4327.4	9830	7746.1	49859	24791	40678	892.95	6115.2	10236	12964	19103	13788	39290	30302	65296	14553	5479.1	10136
pme3311	2	C6H14O12P2	D-Fructose-1,6-biphosphate	Others	Saccharides and Alcohols	488-69-7	3	50652	14700	20670	8277.9	7622.6	12443	30573	24502	15089	42279	48458	23786	13766	6406	6880.1	63506	40506	55611
Zmyn000083	2	C6H14O12P2	D-Glucose 1,6-bisphosphate	Others	Saccharides and Alcohols	10139-18-1	3	37973	26192	27234	717.06	1720.6	2872.5	30651	15356	30687	41542	32909	24368	4273.8	2564.7	7128.5	45552	39906	51331
pmf0400	9	C22H44O2	Docosanoic acid (Behenic acid)	Lipids	Free fatty acids	112-85-6	3	51616	41792	38500	39085	39861	44555	48307	32514	83684	47453	44013	27733	21775	22039	34189	29866	20531	28965
Jmwn002620	8	C15H18O9	Vanillic Acid-4-O-Glucuronide	Phenolic acids	Phenolic acids	-	1	839000	836020	513240	1087500	1603100	1219800	1507400	799530	602090	2575900	3033500	2999500	2106500	2785600	3300000	3208200	4149500	3718800
Lmsn002548	8	C15H18O9	1-O-Caffeoyl-β-D-glucose	Phenolic acids	Phenolic acids	14364-08-0	1	819100	730290	527430	1001300	1474300	1400400	1672500	698120	753220	2743000	2953200	2562200	2133000	2737700	3450400	3074100	4231500	3767900
Lmcp004714	9	C19H18O6	6-Hydroxy-7-Methoxy-2-[2-(3'-Hydroxy-4'-Methoxyphenyl)Ethyl]Chromone	Others	Others	-	3	7764.4	7759.9	4797.7	5290	5976.7	3738.5	2056.8	6056.1	4166	2148	2865.7	4880.4	6304.5	7568.8	4374.3	6368.9	1831.9	842.66
pme0519	3	C12H22O11	D-Sucrose*	Others	Saccharides and Alcohols	57-50-1	1	299670	462960	330490	209430	225450	154820	439660	279320	285350	331130	311930	660240	84388	163180	171730	292770	503650	340600
mws1333	3	C12H22O11	Melibiose	Others	Saccharides and Alcohols	585-99-9	1	165160	315670	160310	86941	165550	130270	250250	274970	171020	239450	274600	284730	62591	108690	78126	123050	146530	151440
mws5038	3	C12H22O11	Isomaltulose*	Others	Saccharides and Alcohols	13718-94-0	1	257950	445930	489320	99299	235970	327720	384730	228780	327570	375930	336050	477770	22344	116180	133620	296850	355720	472340
mws1080	3	C12H22O11	Galactinol	Others	Saccharides and Alcohols	3687-64-7	1	468160	453650	376780	392970	449560	647150	1595900	707330	656350	984430	637810	883980	164190	330760	665570	480410	887600	954440
Lmsn000381	3	C12H22O11	D-Maltose*	Others	Saccharides and Alcohols	133-99-3	1	203040	489510	419140	163640	165730	34970	308890	272010	227600	319360	326700	828830	17391	210090	122280	340330	395870	432410
MA10039641	2	C12H22O11	Lactobiose	Others	Saccharides and Alcohols	63-42-3	1	247240	601630	485430	107400	139590	198280	591350	393300	175590	302760	276440	612400	7272	134950	247960	127510	621200	662860
mws0264	3	C12H22O11	D-Trehalose*	Others	Saccharides and Alcohols	99-20-7	1	160480	319060	208710	141990	118640	159570	225420	163230	106290	265730	172280	403820	19149	114660	119800	158740	256770	159540
HJAP050	6	C19H21NO5	N-Feruloyl-3-methoxytyramine	Alkaloids	Phenolamine	78510-19-7	1	1735400	1700700	2239000	17656000	14834000	3911600	2522900	2731900	3429600	1122100	1706200	6743000	6651400	2429400	3907500	3572400	1479400	1285800
MWS1983	1	C12H24O11	Maltitol	Others	Saccharides and Alcohols	585-88-6	3	29980	53499	45898	20922	16305	33472	58854	40742	42558	41267	50554	9343.2	4235	32194	11960	19316	33226	30774
mws0609	3	C10H12N5O7P	Guanosine 3',5'-cyclic monophosphate	Nucleotides and derivatives	Nucleotides and derivatives	7665-99-8	1	740270	2295300	1996000	1059600	989290	1204200	2080400	1943600	1586800	1388200	1217800	3762200	378890	829200	998180	505500	291150	615000
mws0874	3	C10H14N5O7P	3'-Adenylic Acid	Nucleotides and derivatives	Nucleotides and derivatives	84-21-9	1	374710	395820	354570	171500	167200	186150	309490	384580	331520	244050	376660	505150	92077	104030	164190	245660	235890	286630
pmb0981	1	C10H14N5O7P	Adenosine 5'-monophosphate	Nucleotides and derivatives	Nucleotides and derivatives	61-19-8	1	15184000	12835000	13697000	1448300	1162400	1697500	14018000	15602000	11041000	7594000	5416400	5380400	902340	1103600	991600	11401000	16106000	11298000
pmb0532	1	C10H13N4O8P	Inosine 5'-monophosphate	Nucleotides and derivatives	Nucleotides and derivatives	131-99-7	3	1189900	950420	1125100	110660	93922	128960	1207800	1516500	983630	611290	426210	409480	63200	81016	86895	1016800	1344500	868500
pmb1562	4	C21H34O4	1-Stearidonoyl-Glycerol	Lipids	Glycerol ester	-	1	9890.4	18997	24425	36941	34254	37094	26055	17833	38362	8395.2	14192	4611.2	6994.6	6895.6	2804.7	4952.5	11651	5725.2
MWStz224	11	C20H20N2O4	N-Feruloylserotonin	Alkaloids	Plumerane	68573-23-9	2	87203	46693	245200	1399900	1981400	1960100	172970	253370	179090	383860	618360	953210	2284000	3563700	2770400	325060	492890	416830
MWStz202	5	C20H20N2O4	cis-Moschamine	Alkaloids	Plumerane	193224-24-7	2	109420	92599	182080	1713500	958510	2146300	269260	165030	198860	547110	523620	897410	3356700	3992000	2262700	393200	445500	213000
pme1816	7	C16H18O9	Neochlorogenic acid (5-O-Caffeoylquinic acid)*	Phenolic acids	Phenolic acids	906-33-2	1	30406	12744	327020	1298600	1039200	1486300	744780	659690	564080	1493300	1552100	1762200	20839	84661	151110	1775600	1654500	2216200
mws0178	7	C16H18O9	Chlorogenic acid (3-O-Caffeoylquinic acid)*	Phenolic acids	Phenolic acids	327-97-9	1	16499	19552	342120	1297400	1352200	1786200	717180	741010	639300	1974100	1568200	1959800	19566	104020	191260	2052300	2107300	2129200
mws2108	7	C16H18O9	Cryptochlorogenic acid (4-O-Caffeoylquinic acid)	Phenolic acids	Phenolic acids	905-99-7	2	17255	21430	269970	1019800	867090	1174900	498880	409950	451310	1253800	1241100	1186900	12982	72668	109040	1344700	1304300	1647500
Lmsn003318	7	C16H20O9	1-O-Feruloyl-β-D-glucose	Phenolic acids	Phenolic acids	7196-71-6	1	1673100	2336900	1875500	3680100	3968800	3380200	4561700	2249300	1928600	9685900	6126100	8409300	7541700	6923300	10112000	18173000	12726000	11431000
Hmhn003518	7	C16H20O9	4-O-β-D-glucosylferulic acid	Phenolic acids	Phenolic acids	-	1	2270100	3437200	2489900	4709700	5197800	4429300	5840700	2994900	2788300	11826000	8370600	10005000	9007500	8813600	11177000	20945000	14690000	13119000
Hmmn002544	7	C16H20O9	Ferulic acid-4-O-glucoside	Phenolic acids	Phenolic acids	117405-51-3	1	178790	354030	265640	200680	166990	221940	260490	210030	181430	435940	273690	498660	307560	256670	319470	573320	441740	565450
pmb0296	11	C21H40O4	1-Oleoyl-Sn-Glycerol	Lipids	Glycerol ester	129784-87-8	2	932370	1138500	1064800	2057800	1558500	2828600	1356800	1189900	2335000	1277000	1967900	1183000	1907500	1185400	2990200	882300	1391400	1126700
pmb0998	2	C10H14N5O8P	Guanosine 5'-monophosphate	Nucleotides and derivatives	Nucleotides and derivatives	85-32-5	2	657620	414620	394320	85136	18720	121920	585800	619230	449770	295970	228420	189370	16923	25530	6760.4	724640	1022800	639050
mws5040	1	C12H21O11Na	Turanose	Others	Saccharides and Alcohols	547-25-1	1	45033	92113	68099	32895	59937	129590	213190	114410	226960	102960	75186	110580	108580	41176	191290	73495	117140	201790
pmb0752	8	C17H20O9	3-O-Feruloylquinic acid	Phenolic acids	Phenolic acids	1899-29-2	3	8473.2	15429	3403	11891	15014	20837	14570	3475.4	59580	38198	36447	42130	49175	43972	46873	48183	55508	52456
pmn001695	11	C16H20O10	Trihydroxycinnamoylquinic acid	Phenolic acids	Phenolic acids	-	2	72240	109980	105860	359970	401890	342710	68212	72614	86419	102010	88475	145650	332700	371270	315220	54796	50541	43880
mws0232	6	C17H20N4O6	Riboflavin (Vitamin B2)	Others	Vitamin	83-88-5	1	988860	645040	782760	3575300	2814500	3402700	818590	837240	1314800	792840	1157700	799940	1721100	1580900	1430200	852850	951040	768370
MWS0952	7	C18H40NO5P	Dihydrosphingosine-1-Phosphate	Lipids	Sphingolipids	19794-97-9	3	1183.5	801.52	822.72	1443.1	563.58	945.36	987.91	1139	1319.5	2196.3	2175.2	2259.7	1418.1	1228.6	1517.3	1946.5	1613.3	1981.9
Lmbp003208	8	C17H20O10	Fraxidin-8-O-glucoside	Lignans and Coumarins	Coumarins	-	2	14982	17792	12895	15626	23155	31802	7280.2	13012	20961	63898	52616	80706	81839	68634	69353	65858	60115	65474
pme1286	7	C14H20N6O5S	S-(5'-Adenosy)-L-homocysteine	Amino acids and derivatives	Amino acids and derivatives	979-92-0	1	100700	122020	131770	62126	57386	81835	134900	130870	134600	158580	157870	211130	96091	106390	89524	187470	223230	174790
mws1565	4	C17H24O10	Geniposide	Terpenoids	Monoterpenoids	24512-63-8	2	2017300	1785900	2479100	2746200	3589900	3722100	3385400	3934000	1900600	434060	678880	579720	608590	497010	1274800	336120	331780	263720
Hmmp003004	4	C17H24O10	Vogeloside	Others	Others	60077-47-6	3	1402700	2637500	1696700	2100300	1808300	2543000	1093700	1145100	1669700	267210	137670	256700	470900	616360	1381600	140970	129860	138460
Hmbn005456	11	C21H20O8	1-O-Caffeoyl-3-O-p-coumaroylglycerol	Lipids	Glycerol ester	-	3	12532	14363	16209	23494	24072	24832	14085	21501	26071	13055	16573	15087	27536	34094	25183	9170	10617	11480
Cmjn004337	1	C18H26O10	Benzyl-(2''-O-xylosyl)glucoside	Phenolic acids	Phenolic acids	-	3	73816	67892	65062	12562	26096	32849	87623	70180	55471	38763	32879	49575	34147	37551	35563	37108	59800	39510
pme3007	1	C9H14N2O12P2	Uridine 5'-diphosphate	Nucleotides and derivatives	Nucleotides and derivatives	27821-45-0	1	88733	86323	117590	24274	21145	31543	108200	129810	128430	82429	91184	89962	18092	25713	31900	80304	118710	90956
pmd0152	1	C19H39O7P	LysoPA 16:0 (2n isomer)	Lipids	Glycerol ester	-	3	39321	32835	35649	10873	11782	20883	58013	34970	43062	19129	24366	25292	5427.2	3360.2	6264.6	30595	42292	6022.8
Lmbp003668	5	C20H18O10	Kaempferol-3-O-arabinoside	Flavonoids	Flavonols	-	2	85162	160350	160760	321340	275720	267860	148100	158460	162560	238870	176430	347220	459840	473140	372880	251840	194100	184350
mws1089	10	C12H23O14P	Sucrose-6-phosphate	Others	Saccharides and Alcohols	-	3	21269	10805	14059	2982	4490.9	3950.5	15761	31346	23333	5198	32581	16238	9971.7	7006.3	24544	21401	35258	12978
mws2523	2	C12H23O14P	Trehalose 6-phosphate	Others	Saccharides and Alcohols	4484-88-2	1	6362.2	4041.9	4920.7	2873.1	317.92	3994.6	5081.2	3878.4	8200.4	2771.6	8113.7	3096.4	5422.5	4293.3	4667.9	9271.5	14050	10404
Cmyp005063	8	C21H28O9	Grandidentatin	Phenolic acids	Phenolic acids	15732-48-6	1	217930	213990	213350	157160	178810	222080	246990	203280	228350	261820	270430	242740	440920	530940	239720	339340	364530	313030
pmb0864	1	C19H40NO7P	LysoPE 14:0	Lipids	LPE	-	1	322860	302370	348080	72818	45368	92175	428460	549910	677050	141460	149010	144230	43564	44863	104490	253300	238910	250150
Lmhp008337	1	C19H40NO7P	LysoPE 14:0(2n isomer)	Lipids	LPE	-	1	117320	98363	113690	12670	7938.1	17245	154580	229540	230780	46855	48316	47001	9027.8	7300.7	21476	74003	81514	79749
pmp000436	5	C30H50O	Taraxerol	Terpenoids	Triterpene	127-22-0	2	17167	17473	22656	36872	25067	43941	15793	15818	18892	24496	23271	24199	71811	39906	79103	13150	16755	29578
pme2117	2	C10H15N5O10P2	Adenosine 5'-diphosphate	Nucleotides and derivatives	Nucleotides and derivatives	58-64-0	3	397750	311740	332990	47935	24372	40516	278010	309190	249860	348950	282400	199230	31893	27632	45544	441600	634660	339250
mws0919	12	C21H20O10	Kaempferol-3-O-rhamnoside (Afzelin)	Flavonoids	Flavonols	482-39-3	1	1584.6	9	1310.9	7678.2	6369.8	2637.8	4229.9	660.49	1720.8	12154	9554.2	18555	11239	14302	11003	10605	4378.1	7935.9
pmp000117	7	C22H24O9	3,5,6,7,8,3',4'-Heptamethoxyflavone	Flavonoids	Flavonols	1178-24-1	2	743.5	2139.4	1841.1	2200.5	2612.3	3889.2	5637.7	5558.7	5158.2	6244	5702.8	5156.8	1946	1545.4	1875.4	4474.2	6373	5743.3
Lmtn002324	11	C19H28O11	Benzyl-(2''-O-glucosyl)glucoside	Phenolic acids	Phenolic acids	-	2	25127	21574	25268	141250	128300	153110	26856	18611	30942	53290	34550	41408	140300	169620	157720	19302	23731	22549
mws2186	8	C20H18O11	Avicularin(Quercetin-3-O-α-L-arabinofuranoside)	Flavonoids	Flavonols	572-30-5	1	21729	6424.2	5571.8	9317.2	51769	59803	28539	2228	5872	305750	260090	591400	1070200	1046800	741410	360870	402720	324260
Lmdp003509	8	C20H18O11	Quercetin-3-O-xyloside (Reynoutrin)	Flavonoids	Flavonols	549-32-6	3	41247	6726	23537	38600	50321	90785	16209	12458	4469	418860	347150	665980	1382400	1296500	981730	373760	444410	416680
Cmzn005251	8	C21H22O10	6-O-Caffeoylarbutin	Phenolic acids	Phenolic acids	136172-60-6	3	21345	26404	35155	13482	24617	34210	45738	22730	26895	43656	47308	61556	59463	65380	67599	53863	49302	50462
Lmhp008440	1	C20H40NO7P	LysoPE 15:1	Lipids	LPE	-	2	35870	32211	30711	6463.5	6609.7	8282.8	36196	44152	50884	15749	19037	19295	7185	6799.2	19901	22116	32442	30744
Lmhp008273	1	C20H40NO7P	LysoPE 15:1(2n isomer)	Lipids	LPE	-	2	10295	9479.4	12654	2517	1800.1	1767.3	10041	13662	19737	4680.2	6726.3	6411	1359.5	2293.8	5377.6	8731.4	8160.6	9522.2
pmb0862	3	C20H42NO7P	LysoPC 12:0	Lipids	LPC	20559-18-6	3	6914.4	11531	14713	6192.3	4605.2	4872	29094	61095	46179	37082	32919	34732	3386.3	2466.4	5765.7	28772	31039	41003
Lmhp009187	1	C20H42NO7P	LysoPE 15:0	Lipids	LPE	-	1	283940	233220	275050	35362	37448	62864	300700	413640	538570	92228	101360	74315	25483	23686	70769	168220	179710	163030
Lmhp008885	1	C20H42NO7P	LysoPE 15:0(2n isomer)	Lipids	LPE	-	1	112470	89457	105640	9435.3	7288.1	14651	130310	167700	214720	31463	30232	27728	3810.8	8249.1	19093	57486	78410	56718
pmn001338	1	C21H18O11	Rhein-8-O-glucoside	Quinones	Anthraquinone	34298-86-7	2	15818	11486	15238	10749	14801	11894	13537	23178	18324	9583.8	15709	10637	3082.5	10648	2239.5	12900	11857	11894
Lmjp004533	9	C22H22O10	Kisasagenol A Triacetate	Terpenoids	Terpene	-	1	100220	187650	150750	73267	59649	120560	111810	105540	146590	28509	24532	42449	10977	5667.2	19277	14040	11936	8517.1
Lmhp007836	1	C21H38NO7P	LysoPE 16:3	Lipids	LPE	-	2	531690	537930	594320	38304	38336	67068	700260	845360	772990	236990	283880	217470	29884	37334	80023	424250	446490	397660
Hmcp002316	8	C21H20O11	Isorhamnetin-3-O-arabinoside	Flavonoids	Flavonols	-	1	19660	8809.4	4868.5	38829	29020	63162	22392	7920	5768.8	324370	275540	633950	796650	1085000	537550	394620	344850	316590
pme2459	4	C21H20O11	Luteolin-7-O-glucoside (Cynaroside)	Flavonoids	Flavonoid	5373-11-5	1	9777600	11409000	11356000	24325000	16761000	20209000	9123600	9056400	12974000	2128500	2171500	2895100	3807400	4070600	2876400	1917700	2133300	2207800
Hmpp003270	8	C21H20O11	Luteolin-4'-O-glucoside	Flavonoids	Flavonoid	6920-38-3	1	560650	832020	776820	1674100	1518800	1614200	1502000	716760	964360	2833900	1835600	2690600	3073600	3278200	3090000	2982400	2648100	1970300
mws0913	9	C21H20O11	Kaempferol-3-O-galactoside (Trifolin)	Flavonoids	Flavonols	23627-87-4	1	95838	202550	172780	128830	137530	135760	192840	239230	265940	29088	42586	111620	37001	44407	58606	53047	67225	58708
Xmyp005654	8	C21H20O11	Kaempferol-4'-O-glucoside	Flavonoids	Flavonols	-	1	625810	858420	824470	2263400	838260	1392700	839520	813340	753800	1979100	1167000	2305300	3132400	4286000	2283900	2734000	1844100	1947700
MWS20147	8	C21H20O11	Luteolin-3'-O-glucoside	Flavonoids	Flavonoid	5154-41-6	1	197000	208100	273440	108430	152720	193770	109320	508380	166670	608030	267950	876580	737660	790160	871710	487030	460230	63164
mws1299	4	C21H20O11	Luteolin-8-C-glucoside (Orientin)	Flavonoids	Flavonoid carbonoside	28608-75-5	3	10286	50351	20082	43377	67609	50968	23673	17393	18586	14792	6568.8	5498	4990.8	2100	5257.5	4204	7358.5	15174
mws2209	8	C21H20O11	Kaempferol-3-O-glucoside (Astragalin)*	Flavonoids	Flavonols	480-10-4	1	544160	974100	728090	1705200	1440600	1274700	952730	936730	971250	2702300	2258600	2878300	4085200	3456700	3191000	2295800	2200500	2411700
Zmhn001905	9	C21H20O11	HydroxyAloe-emodin-8-O-glucoside	Quinones	Anthraquinone	-	2	101150	179600	191680	101490	157540	173190	232430	216040	203190	33826	58967	80322	46546	51512	49887	57202	64839	45654
Lmsp004301	6	C21H22O11	3',5,5',7-Tetrahydroxyflavanone-7-O-glucoside	Flavonoids	Dihydroflavone	-	2	95361	196850	290650	606130	662090	491250	182780	225600	199140	85031	40223	112670	47194	96247	140970	73700	62634	54184
mws0057	4	C21H22O11	Eriodictyol-7-O-glucoside	Flavonoids	Dihydroflavone	38965-51-4	2	127080	184880	163380	431370	362320	241680	128820	105700	239450	25530	23615	46440	23224	58462	44351	27384	40451	19462
Lmtn002796	2	C21H22O11	Aromadendrin-7-O-glucoside	Flavonoids	Dihydroflavonol	28189-90-4	3	30305	35267	29870	12568	11813	5600.5	39114	34396	37075	30612	22242	17152	1817.2	10904	19556	48994	46637	39590
HJN086	5	C21H22O11	Eriodictyol-3'-O-glucoside	Flavonoids	Dihydroflavone	-	3	7274.6	9276.6	6005.9	4351.1	21836	10885	1536.8	14406	8842.5	16824	11694	29010	129300	124710	124890	24863	20336	7698.8
Lmhp008763	1	C21H42NO7P	LysoPE 16:1(2n isomer)	Lipids	LPE	-	1	1134800	944090	1024200	125550	126810	195300	1165300	1519100	1690300	417580	430620	498010	118060	123610	268190	631850	776800	686420
Lmhp009034	1	C21H42NO7P	LysoPE 16:1	Lipids	LPE	-	1	1106500	993350	1025100	134720	118070	205780	1240400	1660200	1669100	407070	518250	461750	124140	127060	252030	638150	783360	686440
Lmqn005404	3	C20H20O12	4-Hydroxybenzoyl-1-O-(6''-O-galloyl)glucoside	Phenolic acids	Phenolic acids	-	2	81398	62115	66382	29687	23301	29522	62846	70838	68046	75573	74865	67508	24650	21665	44676	59383	62911	85997
pmb0876	1	C21H44NO7P	LysoPE 16:0	Lipids	LPE	53862-35-4	1	818310	664630	669680	100680	85578	146270	829380	1033100	1191600	206340	233570	195170	50097	51420	156000	339300	405850	410770
pmd0160	1	C21H44NO7P	LysoPE 16:0(2n isomer)	Lipids	LPE	-	1	756370	622660	652910	84490	76113	150210	796500	1074600	1165000	190230	217940	200250	47001	40818	144420	334630	412600	342320
MWS5083	2	C17H21N4O9P	Flavin Single Nucleotide(FMN)	Nucleotides and derivatives	Nucleotides and derivatives	6184-17-4	2	1318900	1149000	1306400	1052500	795160	1262100	1450200	1463700	1549400	1217600	1292000	1032900	636430	517460	686730	1629900	1556500	1509700
pmn001700	10	C30H48O3	24,30-Dihydroxy-12(13)-enolupinol	Terpenoids	Triterpene	-	1	22806	17643	31011	28156	16461	15578	17004	42617	55138	24314	25111	15697	29723	31658	36383	38617	52027	40195
HJN110	3	C30H48O3	Betulinic acid	Terpenoids	Triterpene	472-15-1	3	699.53	499.85	175.98	1353.7	148.81	676.15	1645.4	1001	755.58	1154.8	1112.5	401.2	470.12	1112.5	400.22	378.72	1715.9	174.76
MWSmce052	3	C30H48O3	3-Epiursolic acid	Terpenoids	Triterpene	989-30-0	2	2987.3	2370.5	4062.7	1821.2	468.2	1338.8	1764.9	13667	1382.2	279.92	638.95	15940	2400.4	729.58	436.52	527	3289.9	651.42
mws0034	5	C22H18O11	Epigallocatechin-3-gallate	Flavonoids	Flavanols	989-51-5	3	17680	5855.2	2689	5063.8	4607.5	12835	9178.8	5115.2	7377.5	1348.5	8244.2	19539	17584	16466	19303	2248.2	4565	1345
Lmzn001894	4	C21H18O12	Kaempferol-3-O-glucuronide	Flavonoids	Flavonols	22688-78-4	1	3289700	4541800	4790200	7387400	7092100	5916300	5288400	5084000	6051500	1316300	1077800	1564000	2940700	2910200	2770300	1299300	1062800	1074800
Lmmp003767	4	C21H18O12	Kaempferol-7-O-glucuronide	Flavonoids	Flavonols	-	1	16787000	21444000	24114000	12680000	17809000	22507000	24860000	23262000	20978000	612530	99962	623830	616610	798280	742380	83549	49551	334930
pmp000579	5	C22H22O11	Diosmetin-7-O-galactoside	Flavonoids	Dihydroflavone	-	3	154820	203410	193430	236560	273730	214340	128870	146890	276190	284760	102840	295840	675130	585170	404490	157340	139880	96692
Hmcp002539	8	C22H22O11	Isorhamnetin-3-O-rhamnoside	Flavonoids	Flavonols	-	3	509.31	1587.7	2168.9	2875.7	4467.5	2241.3	1156.5	835.91	360.88	95679	85224	174100	370080	489670	176830	159320	158160	148120
pmp000120	4	C22H22O11	Diosmetin-6-C-glucoside	Flavonoids	Dihydroflavone	-	3	279950	267610	207030	24158	524340	349390	186470	254300	437880	104200	105540	122000	168060	162580	167220	106610	1691.2	119630
pmp000233	9	C22H22O11	Swertiajaponin	Flavonoids	Flavonoid carbonoside	6980-25-2	3	168180	181090	194000	92328	86770	96626	149920	171780	158310	58218	57131	37405	4259.8	4805	24000	47406	51036	55379
MWS0155	2	C14H18N5O11P	Adenylocuccinic Acid	Organic acids	Organic acids	19046-78-7	3	29262	23171	33438	10764	9498.2	6432	28719	26603	34303	30402	33622	19994	299.22	1879.1	6491.6	51644	50503	44595
Lmdp003286	8	C21H20O12	Isohyperoside	Flavonoids	Flavonols	35589-21-0	1	637140	369760	466410	305510	483230	591740	544670	365330	372990	2580700	1497900	2607000	3342100	3729200	3230900	2844300	2818900	2286500
mws0091	8	C21H20O12	Quercetin-3-O-glucoside (Isoquercitrin)*	Flavonoids	Flavonols	482-35-9	1	36872	10165	6277	24475	62866	65802	37600	10698	16493	341500	185260	296820	198130	157880	237400	374350	295230	231480
mws0061	8	C21H20O12	Quercetin-3-O-galactoside (Hyperin)	Flavonoids	Flavonols	482-36-0	1	51244	14103	8587.8	34501	92634	87471	67310	29331	23926	380570	180540	484980	279360	203060	315250	433950	268540	436460
Hmcn001884	7	C21H20O12	6-Hydroxyluteolin 5-glucoside	Flavonoids	Flavonoid	-	1	33294	6854	5145	25966	58414	81699	62492	18121	12664	228510	216580	358680	160250	157040	203980	360530	312570	348280
pmp001309	8	C21H20O12	6-Hydroxykaempferol-7-O-glucoside	Flavonoids	Flavonols	-	1	2365900	245310	199940	1910600	2800100	3779300	1723200	563940	804350	6492100	6168600	8293000	12509000	15527000	9823200	6559200	10032000	7409100
Smgp004575	8	C21H20O12	Quercetin-5-O-glucoside	Flavonoids	Flavonols	-	2	447570	348360	432590	330200	416660	574580	562620	329330	340880	2681400	1556600	2652400	3355000	3788800	3001200	2731900	2884800	2665200
mws1329	8	C21H20O12	Quercetin-7-O-glucoside*	Flavonoids	Flavonols	491-50-9	1	13824	8993.2	7729.8	8808.2	11366	24238	24703	6934.8	7416.2	140090	96534	241870	318240	292840	292680	235310	313190	182880
mws0856	7	C21H20O12	Quercetin-4'-O-glucoside (Spiraeoside)	Flavonoids	Flavonols	20229-56-5	1	33874	5085.8	7945	9677.5	49629	51028	31904	16404	12508	202880	143830	254560	125540	139200	149210	304640	244010	273560
Lmzp002365	7	C22H24O11	Hesperetin-7-O-glucoside	Flavonoids	Dihydroflavone	31712-49-9	3	198260	154730	127150	140060	148650	213680	271660	160370	195720	372920	378280	308680	277340	386250	279350	444860	486320	403450
pme1598	7	C22H24O11	Hesperetin-5-O-glucoside	Flavonoids	Dihydroflavone	69651-80-5	3	36316	12952	11862	22634	46256	59429	21542	11857	5090.5	209440	108620	216250	139720	128550	138170	261970	272880	286880
Lmhp009769	1	C22H44NO7P	LysoPE 17:1	Lipids	LPE	-	1	19362	11407	12904	5891.2	4203.2	4710.1	15846	14109	27300	8938.6	7744.5	12134	5631.7	3729.3	18065	10738	13464	10887
Lmhp009464	1	C22H44NO7P	LysoPE 17:1(2n isomer)	Lipids	LPE	-	1	205250	182060	199560	34456	29267	43731	260280	314310	336130	80393	81505	83986	21866	22100	51460	127170	157640	127420
Xmsn002700	3	C21H22O12	Taxifolin-3'-O-glucoside	Flavonoids	Dihydroflavonol	31106-05-5	3	58646	35161	31264	37167	35847	33250	57086	50863	21011	55772	62595	72599	37289	20310	36013	44053	50316	61153
Lmhp010162	1	C22H46NO7P	LysoPE 17:0	Lipids	LPE	-	3	44924	42811	38704	11419	12086	14591	45447	62071	90839	21403	19533	19057	7169.3	5265.9	32750	19599	37069	28076
pmd0130	1	C22H46NO7P	LysoPC 14:0	Lipids	LPC	20559-16-4	1	1166200	1330700	1401400	699850	599350	740840	1624500	2066000	1913700	989590	1009900	1115000	802390	846350	1140300	1049800	1198000	1219300
Hmjn008136	4	C30H46O4	Camaldulenic acid	Terpenoids	Triterpene	71850-15-2	2	7044.8	1920.5	806.45	2002.2	7721.3	3209.1	9915.5	1404.8	1622.6	1041.4	1846.3	750.45	537.7	465.19	1171.6	3306.5	1450.6	1278
pmn001706	8	C30H48O4	2-Hydroxyoleanolic acid	Terpenoids	Triterpene	26707-60-8	2	6317.9	8506.8	2213.4	4173.3	5928.2	7730	15975	15472	8213.2	12462	73646	1250.3	11012	14309	118150	16815	6206.8	47838
Smpn011792	5	C30H48O4	2,3-dihydroxy-12-ursen-28-oic acid	Terpenoids	Triterpene	-	3	997.15	1275	10297	1460.2	3675.5	9534.2	15620	4952.2	7799.4	7233	7194.9	4330.5	7062.5	9823.9	10744	5987	4653.1	5457.8
Lmzn006169	5	C30H48O4	Pomolic acid	Terpenoids	Triterpene	13849-91-7	1	181600	85171	146560	132230	115000	260870	28909	36918	168900	63781	413220	107260	1205900	168620	689340	122870	495250	245890
pmb1912	9	C20H23N7O7	10-Formyltetrahydrofolic Acid	Alkaloids	Alkaloids	2800-34-2	1	1294100	1762400	1743000	801180	783980	903740	1421100	1628500	1882200	795260	533470	466940	454230	688370	1037200	802590	536930	511000
Lmhp008233	1	C23H40NO7P	LysoPE 18:4	Lipids	LPE	-	3	40133	32382	30974	4709.3	3740.7	5096.2	40593	44341	49414	9514.9	17293	13517	3496.2	1076.7	7453.8	17551	22998	15038
Lmhp008589	1	C23H42NO7P	LysoPE 18:3(2n isomer)	Lipids	LPE	-	1	21873000	20590000	22518000	4374000	3678200	5479500	24150000	28354000	28513000	14081000	15745000	15010000	4029800	3985000	7969200	15273000	17907000	17228000
Lmhp008801	1	C23H42NO7P	LysoPE 18:3	Lipids	LPE	-	1	23586000	21707000	21921000	4465000	3729000	5513500	24806000	28177000	28289000	13239000	15776000	14598000	3929000	4156500	7791900	14832000	18046000	17543000
pmp000583	4	C22H20O12	Diosmetin-7-O-glucuronide	Flavonoids	Dihydroflavone	35110-20-4	2	2676900	2535000	2942300	1760000	1908200	1729400	1908700	2206800	2248700	661700	786600	753660	227750	254650	329110	676110	781940	705010
pmb0874	1	C23H44NO7P	LysoPE 18:2(2n isomer)	Lipids	LPE	-	1	892520	870420	941150	178040	142490	217210	882670	1078400	1074800	412110	467440	488510	138450	131980	244340	619200	664000	605260
pmb0881	1	C23H44NO7P	LysoPE 18:2	Lipids	LPE	-	1	889950	862970	921820	181670	148610	216890	928690	1080200	1072000	419760	444320	500110	154270	146730	244330	593880	660560	637270
Hmjp003123	8	C21H18O13	Quercetin-5-O-glucuronide	Flavonoids	Flavonols	-	2	1548100	815620	393110	1734200	7603600	6620700	2589900	988310	1314400	9696700	6885400	12220000	20220000	21214000	16339000	10104000	10232000	8264700
Lmmp003783	4	C21H18O13	Quercetin-3-O-glucuronide	Flavonoids	Flavonols	22688-79-5	2	2681100	485700	197620	1839000	1356800	2220600	3953800	605840	839430	9	9	9	9	9	9	9	9	9
Zmhn004909	8	C21H18O13	3,4-Digalloylshikimic acid	Phenolic acids	Phenolic acids	-	3	18683	1754.2	5872.5	8181.5	51448	44977	14507	6386.5	20358	82253	54944	90576	147420	151190	138360	77726	68998	64472
Lmfn003760	8	C21H18O13	Quercetin-4'-O-glucuronide	Flavonoids	Flavonols	201463-36-7	1	366340	243620	138970	487770	1652200	1658500	638150	255440	325010	2206600	1954900	2872200	5965200	4845200	5222300	2866300	2796200	1757300
Lmqp003647	8	C21H18O13	Herbacetin-3-O-glucuronide	Flavonoids	Flavonols	-	1	3536500	135250	99802	2385000	1010100	3960700	3183200	227030	321430	7893500	8000900	8366500	12936000	12427000	14278000	8596200	10079000	10730000
Lmsn003409	9	C22H22O12	1-O-Galloyl-6-O-p-Coumaroyl-β-D-glucose	Phenolic acids	Phenolic acids	-	3	14105	11359	10058	1822.9	3658	1833.6	7795.7	14182	4994.1	5065.7	1355.7	893.76	1352.7	922.03	889.2	906.98	891.02	453.95
Hmcp002207	8	C22H22O12	Isorhamnetin-7-O-glucoside (Brassicin)*	Flavonoids	Flavonols	6743-96-0	1	180330	94422	98372	141860	220260	439010	177270	96539	88865	2152300	1878300	4141400	4557000	6002900	5523900	3120200	2762700	2582400
Lmsn004162	8	C22H22O12	1-O-Galloyl-2-O-p-Coumaroyl-β-D-glucose	Phenolic acids	Phenolic acids	94356-18-0	3	16342	8240.2	4059.8	15148	41378	74799	19744	14019	11604	82685	52229	98974	151800	157740	152530	85612	74301	60786
Lmjp002906	8	C22H22O12	Rhamnetin-3-O-Glucoside	Flavonoids	Flavonols	27875-34-9	1	179020	67904	63438	153370	193800	490690	232520	84129	102420	2132400	1649200	4009000	4251900	5539800	6047600	2864200	2555000	2200800
Lmjp003044	8	C22H22O12	Isorhamnetin-3-O-Glucoside*	Flavonoids	Flavonols	5041-82-7	1	181880	87033	66705	166200	213930	488030	258600	104260	96151	2136700	1885100	4026400	4414900	5536800	6487800	3033300	2428100	2240800
Lmjp003295	8	C22H22O12	6-Methoxykaempferol-3-O-glucoside	Flavonoids	Flavonols	63422-27-5	3	101280	78955	58948	131640	208690	374710	236690	99128	98070	2245200	1840600	3748400	4708700	6084800	6662500	2780900	2399300	2455200
Hmgp002036	8	C22H22O12	Nepetin-7-O-glucoside	Flavonoids	Flavonoid	569-90-4	1	121610	71604	44971	122540	204510	529390	220430	128330	104710	2329300	1788200	3703000	4646600	5634200	6377800	2597600	2756300	2355700
mws1454	8	C23H26O11	Persicoside	Flavonoids	Dihydroflavone	28978-03-2	2	1219.5	1307.8	551.41	1435.8	432.79	898.78	1514	1579.6	3499.3	18860	12810	34613	26374	27169	26792	34302	30300	19111
mws0289	1	C23H46NO7P	LysoPE 18:1	Lipids	LPE	89576-29-4	1	15708000	12308000	14406000	2668500	2487800	3734500	15922000	18839000	20027000	6383600	6708800	5264100	1524500	1813800	3261300	10279000	12156000	10680000
pmb0856	1	C23H46NO7P	LysoPE 18:1(2n isomer)	Lipids	LPE	-	1	10685000	7955400	9684900	1774300	1682000	2497700	10854000	12465000	13242000	4088500	4382300	3468400	1025800	1097600	1946400	6298700	7980700	6870100
pmb2260	1	C23H46NO7P	LysoPC 15:1	Lipids	LPC	-	2	128220	131970	127070	60658	62868	58988	114270	163070	173960	122400	97896	122620	93945	83305	139740	127790	117820	136930
pmb0883	1	C23H48NO7P	LysoPE 18:0	Lipids	LPE	69747-55-3	1	391810	343730	328820	50636	46865	89804	507360	517400	649160	143590	183560	171860	30147	37279	92784	202930	259110	249530
pmb2319	1	C23H48NO7P	LysoPC 15:0	Lipids	LPC	108273-89-8	1	555860	493310	598620	308420	246760	315290	568180	730850	855540	411310	390050	343550	240300	239190	441380	473450	504290	424660
Lmhp009129	1	C23H48NO7P	LysoPC 15:0(2n isomer)	Lipids	LPC	-	1	277980	251180	306930	81838	67957	95047	320280	444690	421440	160200	156030	114390	59115	57090	121920	213490	249000	216600
pmb0880	1	C23H48NO7P	LysoPE 18:0(2n isomer)	Lipids	LPE	-	1	216490	156400	180530	34194	31954	45217	200750	241620	261860	80604	83511	68539	19017	21791	42940	132970	159490	140370
pmp000444	2	C30H46O5	27,28-Dicarboxyl ursolic acid	Terpenoids	Triterpene	-	3	16934	17707	19199	11770	8059.9	9017.3	13653	13823	21477	8474.9	13333	10431	6425.3	8736.7	13116	19028	27558	19320
pmn001342	6	C23H20O12	Rhein-8-O-(6'-O-acetyl)glucoside	Quinones	Anthraquinone	-	2	1987	2510.2	17341	29952	30294	12765	16653	7827.2	20218	7203.2	2379.2	15715	3471	12349	21642	9360.5	3644.8	4361.2
Zmdn004335	7	C23H20O12	Rhein 1-O-(O-acetyl)-glucoside	Quinones	Anthraquinone	-	2	4002.5	15128	5434.2	27945	19027	3678	10233	14533	4597.8	7400.8	7110.8	20790	7987.8	6423	5206.2	17782	18235	15327
Smpn009230	2	C30H48O5	2α,3α,23-trihydroxyolean-12-en-28-oic acid	Terpenoids	Triterpene	-	3	14226	14101	11421	7470	9213.4	8254.6	5693.5	5239.7	7022	4852	9917.5	5414.4	6923.6	4587.1	6871.8	15651	15853	5560.6
Lmsp005625	3	C22H18O13	3-O-Methylellagic acid-4'-O-(5''-O-acetyl)arabinoside	Tannins	Tannin	-	3	3309.5	1852.3	1009.4	1357.9	2404.9	2374.7	3199	2374.3	4244.2	2691.2	4975	4008.2	1154.1	632.57	1357	3819.1	846.18	1350.5
Lmmn003398	9	C23H22O12	Kaempferol-3-O-(6''-acetyl)glucoside	Flavonoids	Flavonols	-	3	39262	56356	61133	5019.5	17038	8198.3	43786	55583	57516	15333	13867	15778	34328	36306	30468	14326	17425	24511
pma1303	1	C24H46NO7P	LysoPC 16:2	Lipids	LPC	-	1	700490	691950	801510	136350	123290	139000	750010	1110400	933120	399830	390650	363600	142790	145500	203720	530890	569790	550470
pmb0863	1	C24H46NO7P	LysoPC 16:2(2n isomer)	Lipids	LPC	-	1	697560	692250	834280	137000	126840	146680	745940	1166700	964240	384250	396590	383680	162010	138330	210930	528270	574340	550670
Lmhp008833	1	C24H48NO7P	LysoPC 16:1(2n isomer)	Lipids	LPC	-	1	5463200	4672500	5311900	1207400	1198000	1394500	5403500	7298300	6653800	2624100	2720000	2622700	1465100	1396200	1781500	3603800	4442900	3800700
pmp001270	1	C24H48NO7P	LysoPC 16:1	Lipids	LPC	76790-27-7	1	5121800	4721800	5281600	1252600	1091700	1309900	5393600	7120600	6660200	2430100	2620200	2381200	1439400	1407100	1835900	3342800	3578700	3875500
HJN054	4	C25H34O10	Secoisolariciresinol-9'-O-xyloside	Lignans and Coumarins	Lignans	-	3	708920	747980	777520	1142300	1085100	993070	804660	710970	1001800	63737	118630	113450	246920	299780	245260	131370	179590	66162
pmb0855	1	C24H50NO7P	LysoPC 16:0	Lipids	LPC	17364-16-8	1	20680000	18663000	20872000	8814600	6884600	9558100	21309000	24057000	27311000	10686000	10248000	9119400	6019800	6383400	10498000	14504000	14341000	13960000
pmd0132	1	C24H50NO7P	LysoPC 16:0(2n isomer)	Lipids	LPC	-	1	22064000	19258000	22139000	9717400	7227100	10148000	22354000	24529000	28850000	11408000	11061000	9675300	6483300	6723300	12022000	15836000	14839000	14567000
Lmhp009349	1	C25H44NO7P	LysoPE 20:4(2n isomer)	Lipids	LPE	-	3	2897.3	3062.6	2196.5	661.37	160.4	564.18	2020.6	2359.1	2398.8	1458.8	1622.4	1050.7	1136.4	1060.2	1532.3	1290.1	2184	1692.2
Lmhp009497	2	C25H44NO7P	LysoPE 20:4	Lipids	LPE	-	3	76.458	1762.1	2337.4	302.41	76.372	907.2	2530.9	1264.6	2678.4	1342.6	1351	1719.4	372.39	525.96	1374.2	1651.8	2696.7	1975.5
Lmhp009802	1	C25H46NO7P	LysoPE 20:3(2n isomer)	Lipids	LPE	-	2	87560	73014	86617	16636	14535	21419	90553	115080	127520	38878	38104	43329	14250	17573	26412	45903	57123	44860
Lmhp010040	1	C25H46NO7P	LysoPE 20:3	Lipids	LPE	-	2	91185	77246	92263	17532	13282	21666	103410	129590	124600	42319	42391	45562	13067	15006	25362	50495	59103	50248
pmb3000	7	C24H24O12	Chrysoeriol-7-O-(6''-acetyl)glucoside	Flavonoids	Flavonoid	-	2	5423.2	10254	8748.8	6419	9799.8	3648	12687	8437	7888.2	38569	15338	24176	16950	10296	4832.5	25972	42797	54822
Lmhp010757	1	C25H48NO7P	LysoPE 20:2	Lipids	LPE	-	1	323310	296670	324390	43457	37216	58625	357450	470290	577840	96119	106540	117400	37047	37013	69422	157380	198980	170070
Lmhp010514	1	C25H48NO7P	LysoPE 20:2(2n isomer)	Lipids	LPE	-	1	328070	277510	321720	38466	33533	53541	348360	473900	549600	86421	110240	107960	41322	32386	61457	153000	193080	174310
Lmhp008718	1	C25H48NO7P	LysoPC 17:2	Lipids	LPC	-	1	430920	409340	462410	96015	93794	106230	425450	556530	510340	182380	183690	202320	97415	87799	112460	257150	300120	310190
pmb3045	6	C23H22O13	Tricin-7-O-Glucuronide	Flavonoids	Flavonoid	-	2	18908	33126	28958	166990	83251	129890	53628	40456	51337	46184	33660	34630	83230	78042	54528	32854	37932	45326
Hmln002199	8	C23H22O13	Quercetin-3-O-(6''-acetyl)galactoside	Flavonoids	Flavonols	-	3	5457	1209.5	9648	3679	9835.8	8564.5	3058	603	1226.5	19830	15777	5709.8	39784	55410	73054	42529	33037	33744
Lmhp009590	1	C25H50NO7P	LysoPC 17:1	Lipids	LPC	-	1	886480	701840	858340	182460	201850	175690	819400	1079700	1109700	362020	335490	256070	188350	149120	224920	588380	659550	668630
Lmhp010515	1	C25H52NO7P	LysoPC 17:0(2n isomer)	Lipids	LPC	-	1	301690	306630	340710	163240	121570	168650	315600	366770	436050	204100	191850	188280	94041	126820	278310	265230	280420	255900
pmb2406	1	C25H52NO7P	LysoPC 17:0	Lipids	LPC	50930-23-9	1	792870	707880	811350	394630	292950	365140	765230	902620	1161900	483120	410760	359270	242820	253690	433770	623380	601050	594360
Hmqp006235	1	C26H46NO7P	LysoPC 18:4	Lipids	LPC	-	1	314130	305640	379070	47470	44344	39672	362670	503100	454870	70581	81126	98602	63234	28488	73637	127070	168330	201540
pmn001382	7	C25H24O12	Isochlorogenic acid A	Phenolic acids	Phenolic acids	2450-53-5	2	9633.5	2687.2	40693	140140	160650	205710	304680	262900	296540	1046700	1026600	801180	2420	9507	32117	1054500	867000	1215300
MWSmce346	7	C25H24O12	1,3-Dicaffeoylquinic acid	Phenolic acids	Phenolic acids	19870-46-3	3	3898.5	6746.2	4484	23465	35942	42592	108200	147770	133440	673810	632520	500580	6686.6	10438	16371	658120	549500	725100
Li512115	7	C25H24O12	Isochlorogenic acid B*	Phenolic acids	Phenolic acids	14534-61-3	2	23823	23379	61473	435070	302960	404000	726100	613320	695210	991840	1253000	982900	1497	12480	16631	1006900	680300	1143600
pmn001384	7	C25H24O12	Isochlorogenic acid C*	Phenolic acids	Phenolic acids	57378-72-0	2	15808	15408	56867	468460	369000	421380	767720	705480	542150	1051300	1200900	969390	2217.2	6865.8	13911	846170	677810	1362300
pmb0865	1	C26H48NO7P	LysoPC 18:3(2n isomer)	Lipids	LPC	-	1	465000	479570	523140	136980	122990	147630	502160	595240	573680	308980	324360	276860	141180	125060	179860	369930	413490	376750
pmb0854	1	C26H48NO7P	LysoPC 18:3	Lipids	LPC	-	1	18387000	17684000	19076000	4772900	4546100	5007000	18719000	22729000	19362000	11575000	11357000	11022000	5089200	5530900	6998700	13377000	14561000	14171000
pmp001273	1	C26H50NO7P	LysoPC 18:2	Lipids	LPC	-	1	9759900	10625000	9835400	3471200	3392400	3763500	10978000	12051000	11490000	5569900	6134800	6061600	3928300	3381400	4855300	8014400	9121300	8582900
pmp001251	1	C26H50NO7P	LysoPC 18:2(2n isomer)	Lipids	LPC	-	1	1018600	1049100	1060400	369840	353910	374750	1050900	1181300	1057400	574430	568580	611810	378760	327320	444340	815780	856460	812040
pmn001644	8	C23H20O14	Quercetin-3-O-(2''-acetyl)glucuronide	Flavonoids	Flavonols	-	2	8877	2381.5	1080	590.5	7674.5	1193.5	1761	1773.5	2341	26090	27484	49745	59881	29606	28348	47131	52304	22978
Li512111	8	C24H24O13	Isorhamnetin-3-O-(6''-acetylglucoside)	Flavonoids	Flavonols	-	3	4814.4	5005.7	1804.6	2831.1	9236.5	2424.5	1470.7	5000.6	4561	47263	30321	43550	50090	63633	51778	63566	63301	84853
pmn001378	7	C26H32O11	Pinoresinol-4-O-glucoside	Lignans and Coumarins	Lignans	41607-20-9	2	125880	88924	85057	17955	6652.2	20006	90285	60480	57133	293840	249240	188310	109880	133870	92214	315790	257440	311630
Lmsp003655	8	C26H32O11	Dehydrodiconiferyl alcohol-gamma'-O-glucoside	Phenolic acids	Phenolic acids	-	1	656900	532010	642890	1543800	1369400	1367300	1029200	414300	570340	2780100	2732600	3218900	3509100	2818900	2037500	2584900	2549900	2240800
pmp001281	1	C26H52NO7P	LysoPC 18:1	Lipids	LPC	-	1	20200000	17498000	20453000	4848200	4242700	4722000	19818000	23605000	21137000	9256400	8448500	7257000	2982700	3025000	4084900	14718000	15894000	15205000
Lmhp010190	1	C26H52NO7P	LysoPC 18:1(2n isomer)	Lipids	LPC	-	1	597330	512150	593530	127220	115110	128950	581760	696160	604030	249810	218530	204620	82913	79592	108840	410140	451310	424970
Lmjp003834	4	C25H30O12	6-O-p-Methoxycinnamoylcatalpol	Terpenoids	Monoterpenoids	121710-02-9	2	286070	135690	136970	360770	318190	254160	200950	155430	397110	65849	53125	144800	339870	103590	161410	135220	38067	7617.5
pmd0136	1	C26H54NO7P	LysoPC 18:0(2n isomer)	Lipids	LPC	-	1	1291700	1172700	1309600	338540	249610	380940	1271400	1547900	1762900	618770	732800	575530	140050	269490	394840	864630	754710	725220
mws0126	1	C26H54NO7P	LysoPC 18:0	Lipids	LPC	19420-57-6	1	7620600	6759900	7433500	2707300	2116300	3076700	7132800	8472700	10497000	3977200	4793800	3845000	1891900	2091600	3286300	5030100	4982500	5097000
pmp001259	8	C28H47NO8	5,8,11,14-Pentadecanoamide	Lipids	Free fatty acids	-	2	32826	25480	28550	95403	57840	57655	59143	49448	66503	79198	76560	105430	126310	129040	115270	79586	60436	80534
Lmhp008924	1	C27H50NO7P	LysoPC 19:3	Lipids	LPC	-	2	9537.9	8431	11423	609.84	408.27	1164.6	9012.7	10425	10014	4538.4	6384	3027.9	2119.1	2083.9	4154	5820.5	5884.1	2413.5
Lmbn001181	11	C22H28O15	Fraxetin-7,8-di-O-glucoside	Lignans and Coumarins	Coumarins	-	2	27179	37623	10023	234600	218690	206350	18025	28070	17383	22651	23464	45577	132650	188730	207110	14212	11871	16019
Lmhp007840	1	C27H52NO7P	LysoPC 19:2	Lipids	LPC	-	2	177990	172920	201750	54227	48953	51424	210260	284930	225100	192770	147360	162070	57986	67857	98499	184920	142800	167340
Lmhp007598	4	C27H52NO7P	LysoPC 19:2(2n isomer)	Lipids	LPC	-	2	162980	220070	201220	224530	219590	227570	224300	310430	381690	28782	23065	22087	25947	25902	42450	45634	39287	36362
Lmdp004892	1	C24H22O14	Kaempferol-3-O-(6''-malonyl)glucoside	Flavonoids	Flavonols	-	1	415450	327130	456350	175940	202940	211750	450570	581800	533910	249080	206260	267890	139440	182670	225430	378590	364570	538590
pmp000587	1	C24H22O14	Luteolin-7-O-(6''-malonyl)glucoside	Flavonoids	Flavonoid	-	1	13887	19744	22284	8319.3	7129	5870.3	31062	33238	27298	7982.5	7119.6	13036	12032	17415	19962	13123	13935	15125
Lmhp010908	1	C27H54NO7P	LysoPC 19:1	Lipids	LPC	-	1	255440	221870	244790	57843	58922	57210	226280	306660	314630	106200	105340	85560	53198	50940	62571	152570	190890	185820
Zmfn000481	2	C14H22N2O16P2	Uridine-5'-Diphosphate-D-Xylose	Nucleotides and derivatives	Nucleotides and derivatives	3616-06-6	3	258200	222950	265980	103660	68201	108290	283890	304410	376370	252100	194150	218430	79523	73953	102530	293020	468830	297480
pmb0824	8	C25H28O13	Syringic acid-4-O-(6''-feruloyl)glucoside	Phenolic acids	Phenolic acids	-	3	31814	28553	24466	27474	19325	41584	41516	21668	31977	57165	64208	80052	52491	60862	64704	72849	74511	77831
pmb2228	1	C27H56NO7P	LysoPC 19:0	Lipids	LPC	108273-88-7	1	107420	92920	111390	19632	24122	16740	71707	94561	139260	32113	20670	20910	14640	14403	25230	55275	42509	42662
pmc0960	7	C28H50NO7P	LysoPC 20:4	Lipids	LPC	-	3	6799.3	6677.1	5390.6	2243.3	4483	5303.4	3674.8	5946.5	9019.6	8452.7	9327.7	7593	5008	6060.8	2775.2	12192	13946	10988
pmp001282	1	C28H50NO7P	Propyl 2-(trimethylammonio)ethyl phosphate	Others	Others	-	1	8813600	7405800	8660800	1869300	2134600	2669500	9429600	9896000	8949700	4216500	4163100	3737600	1770800	1765700	2284800	6769700	7104500	6735800
Lmhp009890	1	C28H52NO7P	LysoPC 20:3	Lipids	LPC	1199257-41-4	1	483690	464660	470210	139820	131180	143670	487410	675010	566400	272520	268590	290990	194000	183330	212760	314340	346510	332780
pmd0147	1	C28H54NO7P	LysoPC 20:2	Lipids	LPC	-	3	1803100	1858100	2063700	450300	334670	421660	1737900	2550400	2418500	815280	753020	900300	514660	504140	558280	1148600	1352000	1426200
pmd0146	1	C28H54NO7P	LysoPC 20:2(2n isomer)	Lipids	LPC	-	3	1844700	1754100	2110800	440780	332440	449830	1710400	2494700	2461900	794860	792170	866980	515200	480090	571570	1126600	1363900	1410800
pmb0608	6	C25H24O14	Chrysoeriol-7-O-(6''-malonyl)glucoside	Flavonoids	Flavonoid	-	1	35802	51078	49379	141500	111860	62833	49932	48988	74301	18469	17007	33804	39248	58664	46553	10022	23250	30024
pmp000588	11	C25H24O14	Diosmetin-7-O-(6''-malonyl)glucoside	Flavonoids	Dihydroflavone	-	1	2903.8	1118.5	1773.4	6689.7	5963.1	801.17	486.07	4198.4	6113.4	2941.5	1760.2	4061.9	3550.4	3062.7	8637.6	240.65	721.85	2011.7
Lmhp011549	1	C28H56NO7P	LysoPC 20:1	Lipids	LPC	-	1	1300200	1104200	1288500	328810	251990	296330	1161300	1606800	1626500	470880	373800	432180	263720	257420	351990	760200	868220	820900
Hmln002189	8	C24H22O15	Quercetin-3-O-(6''-malonyl)galactoside	Flavonoids	Flavonols	-	1	15664	2121	11833	14702	17777	16172	24421	12001	9665.5	65991	37734	56836	102280	138910	150120	89327	104590	100890
pmp000589	8	C24H22O15	Quercetin-7-O-(6''-malonyl)glucoside	Flavonoids	Flavonols	-	1	33498	5076.8	19542	22604	31918	27017	24638	22512	21348	123340	60100	87139	162760	212680	210200	127620	144200	189010
pmb2979	9	C25H26O14	Hesperetin-7-O-(6''-malonyl)glucoside	Flavonoids	Dihydroflavone	-	2	63563	51187	81597	33537	33018	28536	70386	66827	59610	29057	28494	32576	25372	44724	45398	23593	35712	18563
mws1138	7	C24H26N2O13	Betanin (Betanidin-5-O-glucoside)	Alkaloids	Plumerane	7659-95-2	3	12696	575.25	7977	6900.8	6487.8	22403	4130.2	4263	5556.5	71165	42648	44654	14250	51692	92592	90537	114440	78437
pmd0142	1	C28H58NO7P	LysoPC 20:0(2n isomer)	Lipids	LPC	-	3	33015	31698	36972	12564	7590.8	10346	28641	45650	47027	13806	15281	11099	7101.2	6828.5	10286	23153	24279	24960
pmd0143	1	C28H58NO7P	LysoPC 20:0	Lipids	LPC	108341-80-6	3	82541	93928	93597	26860	19644	25671	82684	122120	123410	27789	35080	25502	19212	18269	22622	52613	61672	58529
Lmmn002260	7	C27H36O12	5'-Methoxyisolariciresinol-9'-O-glucoside	Lignans and Coumarins	Lignans	-	2	98124	103750	73515	34175	31183	31234	183800	121050	58360	293790	289550	213660	46402	65665	59194	330960	393040	316270
Rfmb25702	7	C28H34O12	Pinoresinol-4-O-(6''-acetyl)glucoside	Lignans and Coumarins	Lignans	-	3	126750	121390	124650	88487	74227	111250	112320	112090	105890	557870	476150	412580	247760	304190	355370	612800	503820	523050
HJAP064	8	C25H24O15	Isorhamnetin-3-O-(6''-malonylglucoside)	Flavonoids	Flavonols	-	1	1899	8407.8	4581.1	12606	1511	16286	7664.9	6968.9	8516.6	47523	56543	67030	70262	78330	132600	80651	85047	94559
pmb2922	2	C15H24N2O17P2	Uridine 5'-diphospho-D-glucose	Nucleotides and derivatives	Nucleotides and derivatives	133-89-1	1	1251600	1068000	1088800	426750	311820	335740	1252500	1208200	1494900	1261200	926110	1087100	312520	367650	490480	1495100	2231400	1719000
Lmmp003306	8	C25H26O15	Quercetin-3-O-xylosyl(1→2)arabinoside	Flavonoids	Flavonols	-	1	152900	23154	4807	91192	158410	217060	99305	21311	27011	708100	723040	1002500	1395200	1814400	1139100	845930	817720	773970
pme0430	11	C30H24O12	Procyanidin A1	Tannins	Proanthocyanidins	103883-03-0	3	1189	597	596	5216.2	5299.2	2321	1160.5	606.75	1160.5	2968.8	2960	2359.2	5957.2	618.25	4656	2943	1158.5	2399
pme0432	8	C30H24O12	Procyanidin A2	Tannins	Proanthocyanidins	41743-41-3	3	20772	30574	11718	81626	75973	89116	40044	10798	56206	109360	98128	175300	155060	210730	193820	88181	122470	83959
Lmpp003930	4	C30H26O12	Apigenin-7-O-(6''-p-Coumaryl)glucoside	Flavonoids	Flavonoid	-	3	21191	21409	24844	3850.5	13542	46335	27760	17194	26409	1988.2	10108	6126.2	13784	14536	18485	11153	9333.5	3664.2
pme0368	9	C27H30O14	Apigenin-7-O-rutinoside (Isorhoifolin)	Flavonoids	Flavonoid	552-57-8	3	26222	27627	30686	12875	7335.5	21963	22658	23940	17182	4426.2	7847.8	9	14023	10058	15056	11137	5085.8	10152
mws0047	5	C27H30O14	Apigenin-7-O-neohesperidoside (Rhoifolin)	Flavonoids	Flavonoid	17306-46-6	3	13745	6602.6	5858.8	537.77	12052	33259	9090	3716.5	5971.8	7467.1	7357.5	11841	14946	23428	59862	18175	6212.7	13981
mws1409	1	C15H22N2O18P2	Uridine-5'-diphosphoglucuronic acid	Nucleotides and derivatives	Nucleotides and derivatives	-	3	38038	41134	58160	10702	5113.5	8446	61591	61436	69707	36665	35464	34562	10560	8694.2	12782	60620	55961	49512
HJAP148	4	C26H28O15	Kaempferol-3-O-sambubioside	Flavonoids	Flavonols	27661-51-4	1	9352700	13848000	13361000	24691000	30483000	25369000	11275000	13758000	17170000	1947900	2054100	1485000	1738800	1765700	1457900	1951000	1675600	1801200
MWSHY0056	11	C27H32O14	Naringenin-7-O-Rutinoside(Narirutin)	Flavonoids	Dihydroflavone	14259-46-2	2	10165	8660.2	7360	74778	94179	188600	10067	7831.2	15226	19698	22107	30921	101750	145180	250410	34513	2868.8	13284
pmb4486	11	C29H40N8O5	Hordatine B	Alkaloids	Phenolamine	10502-21-3	2	64371	48821	58804	239410	195770	248610	59775	46927	64069	48371	52232	67087	189010	256310	197160	30584	31372	32214
Xmzn007677	1	C33H35N5O5	Ergotamine	Alkaloids	Plumerane	113-15-5	3	22020000	18217000	21292000	5239800	5621800	5900900	20053000	23308000	20576000	9736800	9139500	8580000	3851300	3754000	4725200	15774000	17590000	15762000
pmb0492	6	C34H37N3O6	N',N'',N'''-p-Coumaroyl-cinnamoyl-caffeoyl spermidine	Alkaloids	Phenolamine	-	3	284960	378900	418880	1586900	1505400	1219300	330340	343320	343510	295290	399200	383320	1204600	787250	745100	302840	326600	287780
Hmgp003641	5	C28H32O14	Chrysoeriol-6-C-rhamnoside-7-O-rhamnoside	Flavonoids	Flavonoid carbonoside	-	2	16374	6889.7	5184.7	25655	26448	38901	10894	9631	16952	39066	33284	50875	140460	106790	79732	50058	30844	18255
pmp001288	5	C28H32O14	Acacetin-7-O-rutinoside (Linarin)	Flavonoids	Flavonoid	480-36-4	1	368570	233260	196350	789870	1040900	1247000	297650	226730	276150	1638700	1351800	2115800	6195900	4551700	3058000	2120700	1320000	655950
pmp000593	6	C27H30O15	Luteolin-7-O-rutinoside	Flavonoids	Flavonoid	3563-98-2	1	743980	399040	235440	1591000	2099000	1784300	810330	886810	905330	296260	294080	435530	769770	824320	528900	233210	288070	359250
Lmjp002596	8	C26H28O16	Quercetin-3-O-sambubioside*	Flavonoids	Flavonols	83048-35-5	1	3236800	427760	252210	2188600	4214100	6901600	3123900	822140	911020	8652900	7313500	8313900	15524000	16506000	14664000	9303000	12921000	8899500
Lmtp004044	8	C26H28O16	Quercetin-3-O-apiosyl(1→2)galactoside*	Flavonoids	Flavonols	-	1	3373000	508180	295070	2690600	3986600	5821800	2852000	835250	1130500	8873600	7876700	8252200	15732000	16184000	19020000	9999400	11758000	8458300
Lmqn000780	2	C17H27N3O17P2	Uridine 5'-diphospho-N-acetylglucosamine	Nucleotides and derivatives	Nucleotides and derivatives	528-04-1	3	41146	23959	32175	10769	9629.7	10563	33476	39216	46396	38719	22182	19838	7976.9	5097	10945	42766	50659	34396
Hmjp003008	11	C27H28O16	Luteolin-7-O-glucuronide-5-O-rhamnoside	Flavonoids	Flavonoid	-	1	8446300	6934800	7573900	19311000	19026000	14955000	7792200	7167000	7152600	5064600	4402800	6371400	10816000	18073000	16701000	3537600	4469000	3730300
MWSHY0190	5	C28H32O15	Diosmetin-7-O-rutinoside (Diosmin)	Flavonoids	Dihydroflavone	520-27-4	2	94497	206830	59808	116710	142120	101920	49245	74905	100190	411030	50861	220350	695810	425790	199020	111510	149800	41630
MWSslk165	5	C28H32O15	Diosmetin-7-O-Neohesperidoside (Neodiosmin)	Flavonoids	Dihydroflavone	38665-01-9	2	110480	243850	99029	179770	163130	146070	61827	105970	107990	547730	77738	267760	851420	539820	242130	170520	186270	48123
mws0059	8	C27H30O16	Quercetin-3-O-rutinoside (Rutin)	Flavonoids	Flavonols	153-18-4	1	535140	15518	14955	445090	179130	545370	409100	24328	49703	1149100	1226600	1719800	1752500	1604700	1333800	1314400	1487200	1289400
Lmbp002336	6	C27H30O16	Quercetin-3-O-(2''-O-rhamnosyl)galactoside	Flavonoids	Flavonols	-	2	201900	202960	173350	523470	320580	394290	384480	255640	188860	196420	262790	161640	158610	188680	203890	139020	118870	142750
Lmjp002461	8	C27H30O16	Quercetin-3-O-neohesperidoside	Flavonoids	Flavonols	117611-67-3	1	1288600	75561	49700	1255700	635030	1744200	1345200	99152	135410	5804600	5048700	5876800	6494300	7432400	6519800	4977400	5109700	5121100
MWS0132	2	C20H32N6O12S2	Oxiglutatione	Amino acids and derivatives	Amino acids and derivatives	27025-41-8	1	1847600	1753100	1662200	1783900	1535700	1528500	1843000	2444300	2002300	2395100	1791600	2240700	819540	1008100	1117100	2233400	3191900	2563900
Rfmb26201	11	C30H38O14	Syringaresinol-4'-O-(6''-acetyl)glucoside	Lignans and Coumarins	Lignans	-	3	6240.2	7968.4	8414.2	75854	67455	41723	2472	2640.1	15933	7715.5	10409	33549	53946	60656	62953	23739	9972.9	3715
HJAP120	5	C28H32O16	Rhamnetin-3-O-Rutinoside	Flavonoids	Flavonols	-	2	162620	54178	30112	139060	177690	323380	97449	80357	54065	79705	1097400	1610600	3594100	6203900	6559500	1093700	1256900	1218500
Zmxp002867	9	C28H32O16	Chrysoeriol-5,7-di-O-glucoside	Flavonoids	Flavonoid	-	3	79566	108250	99255	49758	54864	14486	58706	83966	99052	6828.8	16193	7810.2	8196	2100	6843	9481.5	4222	12740
Lmmp002963	5	C28H32O16	6-C-Methylquercetin-3-O-rutinoside	Flavonoids	Flavonols	-	1	122690	81611	93397	109590	151170	309310	176930	121110	88637	561650	430660	1295700	1465800	5071700	8892400	836610	668980	595530
MWSHY0064	5	C28H32O16	Isorhamnetin-3-O-neohespeidoside	Flavonoids	Flavonols	55033-90-4	2	47540	44114	40802	131270	148650	330950	138350	45742	71488	1232900	1079800	1457700	3545100	6171300	5649200	1261400	1233300	1338000
Lmsp003939	8	C28H32O16	Isorhamnetin-3-O-galactoide-7-O-rhamnoside	Flavonoids	Flavonols	-	1	211900	45419	42987	188250	166250	361550	146210	62646	60671	530890	373390	511500	464070	669750	1658600	669300	424390	565150
MWSHY0135	5	C28H32O16	Isorhamnetin-3-O-rutinoside (Narcissin)	Flavonoids	Flavonols	604-80-8	2	137800	52320	38555	153310	201930	371990	103190	71982	47311	1407600	1050600	1557300	3572300	6803700	6132000	1253300	1714000	1547100
Lmsp004045	8	C28H32O16	Isorhamnetin-3-O-glucoside-7-O-rhamnoside	Flavonoids	Flavonols	-	1	359280	47716	39454	383650	310640	507410	272630	58690	107630	446920	421180	815840	564040	752640	1268700	659540	488550	643990
Hmln002149	4	C29H36O15	Acteoside	Phenolic acids	Phenolic acids	61276-17-3	3	57794	64805	80344	64894	48181	90137	53484	47500	55792	29188	13240	13890	28997	38506	25810	18014	20018	14043
pmp001311	8	C27H30O17	6-Hydroxykaempferol-7,6-O-Diglucoside	Flavonoids	Flavonols	-	1	16865	7693.4	1502.3	27943	48777	99018	33211	8346.9	12938	287080	172670	402300	665220	594440	534960	519540	427380	324410
Lmmp002796	8	C27H30O17	Gossypetin-3-O-rutinoside	Flavonoids	Flavonols	-	2	61997	1972.8	8047.5	96867	45578	130220	80507	8378.2	8852.5	480410	419200	499140	648460	854230	676610	499690	460910	384750
Lmsp003729	8	C27H30O17	Myricetin-3-O-rutinoside	Flavonoids	Flavonols	-	1	66710	10517	2502.6	101890	48221	121730	67015	11818	10904	551050	412390	543100	676420	716940	607290	436610	524480	510210
pmb0618	8	C28H34O16	Hesperetin-8-C-glucoside-3'-O-glucoside	Flavonoids	Flavonoid carbonoside	-	2	2665.5	1719.5	1716.8	10277	21026	7719	18525	4065.2	3977.5	99766	73509	129700	257920	219920	212860	198890	156890	130550
Hmlp002975	5	C28H30O17	Isorhamnetin-3-O-glucuronide-7-O-rhamnoside	Flavonoids	Flavonols	-	3	13328	2288.8	3534	10406	26435	34450	3523.5	2926.2	4045.2	54360	61031	129560	249910	328200	373140	74915	107480	68201
Hmgn002038	8	C29H34O16	β-Oxoacteoside	Phenolic acids	Phenolic acids	-	3	10072	38791	15722	26528	42911	37716	27977	12270	17100	63629	113690	87130	88659	105700	104770	70463	74496	53438
Lmmp002560	5	C27H28O18	Quercetin-3-O-(2''-O-glucosyl)glucuronide	Flavonoids	Flavonols	-	3	30645	4738.2	3078.8	9048.3	28985	51417	11182	11260	11712	79475	102140	164300	288560	306440	269530	96829	85468	64012
Hmcp001578	8	C28H32O17	Isorhamnetin-3,7-O-diglucoside	Flavonoids	Flavonols	6758-51-6	3	3787.2	2236.5	2251.1	3213.6	1862.9	25512	1761.3	4789.7	2153.3	38809	30434	46670	85099	115830	83147	70281	53079	51106
Lmsp003252	8	C28H32O17	Isorhamnetin-3-O-sophoroside	Flavonoids	Flavonols	-	2	9239.9	745.6	1762	1776.5	2735.8	29134	6976.1	7611.4	2579.1	63849	45763	73086	175490	175990	147260	97784	123130	82785
mws1506	12	C29H36O16	Plantamajoside	Phenolic acids	Phenolic acids	104777-68-6	1	17741	17735	19887	43762	32036	46665	10898	14224	24703	38965	41700	37758	28584	31636	40362	31632	21301	20413
pmb0530	2	C21H27N7O14P2	Nicotinic acid adenine dinucleotide	Nucleotides and derivatives	Nucleotides and derivatives	53-84-9	1	895280	896110	1049200	448130	352110	453600	936920	1193800	1117700	828050	904190	987120	376270	453800	480450	1304400	1498200	1150700
Hmqp003184	4	C29H30O18	Luteolin-7-O-(6''-malonyl)glucoside-5-O-arabinoside	Flavonoids	Flavonoid	-	3	218210	168670	166970	187370	171850	199670	147480	139590	211900	84231	134590	100430	28396	41366	44016	60490	83412	114310
Lmhp009190	11	C33H58O14	2-Linoleoylglycerol-1,3-di-O-glucoside	Lipids	Glycerol ester	-	1	22458	24494	29830	58792	57217	108310	28747	27865	38858	33764	48075	61069	86113	98078	69787	21480	29617	20841
Hmlp003185	4	C30H32O18	Luteolin-7-O-(6''-malonyl)glucoside-5-O-rhamnoside	Flavonoids	Flavonoid	-	3	145470	121800	141550	260390	134650	108750	127760	110860	206750	27326	24698	30556	22745	38090	31293	28022	21098	24793
Lmsn006130	7	C36H56O12	2α,3β,19α-Trihydroxyurs-12-en-23,28-dioic acid-28-O-glucoside	Terpenoids	Triterpene Saponin	-	3	17594	15981	23021	10896	11481	20131	17942	22944	15371	37845	50346	55593	25778	23462	33431	36657	52629	47104
Lmmp003266	8	C29H30O19	Quercetin-3-O-(2''-malonyl)glucoside-7-O-arabinoside	Flavonoids	Flavonols	-	3	25301	5976	1777.5	21049	4810	20120	11804	2987.5	10004	99920	106020	81149	69658	90055	99343	122660	141690	126770
pmn001370	4	C32H42O16	Pinoresinol-4,4'-O-di-O-glucoside	Lignans and Coumarins	Lignans	63902-38-5	2	214780	308090	326670	333070	276690	416930	441500	313780	383860	161080	182770	236210	154720	139000	191760	163080	149600	187570
Xmyp004678	4	C32H38O19	Kaempferol-3-O-(2-O-Xylosyl-6-O-Rhamnosyl)Glucoside	Flavonoids	Flavonols	-	1	6045000	8359300	6733600	11100000	11370000	9587500	5709200	8123400	8653800	265860	308200	246990	450800	390440	498810	233470	194880	277290
Zmlp003063	4	C33H40O19	Luteolin-7-O-(2''-O-rhamnosyl)rutinoside	Flavonoids	Flavonoid	-	2	513810	651670	608020	1240800	1185400	1148400	563770	625510	715640	82231	66120	88084	127330	111000	101880	67969	83379	82543
Hmmn003584	4	C33H40O19	Luteolin-7-O-rutinoside-5-O-rhamnoside	Flavonoids	Flavonoid	-	2	27333	36890	34424	31149	22571	31989	45812	43517	39842	468.77	1458.9	846.85	439.25	1013.2	573.79	1121.2	450.15	1003
mws1035	4	C33H40O19	Kaempferol-3-O-robinoside-7-O-rhamnoside (Robinin)	Flavonoids	Flavonols	301-19-9	2	444020	498940	502940	1201500	1120100	1092500	492000	493170	650650	63597	52508	79084	114240	108090	102900	68726	67142	71742
Lmsp003881	4	C33H40O19	Kaempferol-3-O-rutinoside-7-O-rhamnoside	Flavonoids	Flavonols	-	1	21223000	23990000	19904000	42817000	36518000	39318000	22632000	26243000	22360000	2803800	2636500	3081200	4801600	4289000	4192600	2877900	2461800	3062500
Hmcp001618	4	C32H38O20	Quercetin-3-O-(2''-O-Xylosyl)rutinoside	Flavonoids	Flavonols	129235-39-8	3	67667	107510	91604	177170	131710	163380	76762	97445	108490	8241.8	9904.5	16025	14876	12315	9504.7	10268	12839	14475
HJAP061	8	C32H38O20	Quercetin-3-O-(2''-O-arabinosyl)rutinoside	Flavonoids	Flavonols	-	1	876000	56083	46681	469070	339470	1477400	585100	125600	169130	1837600	1367000	1401500	2468200	3612100	4147800	2194600	2363900	2416200
Hmqp002870	4	C32H38O20	Luteolin-7-O-Sophoroside-5-O-arabinoside	Flavonoids	Flavonoid	-	2	1053500	1079900	1178700	2586800	2745100	2882700	998540	1079600	1365600	104180	107250	141680	201680	169530	207220	112420	147300	197370
pme2651	2	C21H28N7O17P3	NADP (Nicotinamide adenine dinucleotide phosphate)	Nucleotides and derivatives	Nucleotides and derivatives	53-59-8	3	991220	809940	789780	123540	67333	167180	730840	783760	734530	923370	1090200	744580	63150	86857	105280	1050000	1260400	991830
Lmyp003857	4	C35H28O19	Kaempferol-3-O-(2'',6''-digalloyl)glucoside	Flavonoids	Flavonols	-	2	375410	495560	582020	444650	437560	476520	524600	538230	553110	6181.9	3480	7228.8	8428.4	4835.2	12744	1680.8	5113.7	5880.4
MWSslk184	7	C34H42O19	3,6'-Disinapoyl sucrose	Phenolic acids	Phenolic acids	139891-98-8	2	26194	18574	15226	21447	21516	13126	8246.5	18695	16026	45264	28416	63550	20492	19065	31091	85951	72262	50984
pmp001105	8	C33H40O20	Kaempferol-3-O-neohesperidoside-7-O-glucoside	Flavonoids	Flavonols	-	3	8399.7	9171.8	17616	4746.1	4484.4	22671	14628	9451.5	9514.8	73092	85407	65944	189440	233620	187580	77956	100290	66155
Lnrp102163	12	C33H40O20	Quercetin-3-O-rutinoside-7-O-rhamnoside	Flavonoids	Flavonols	-	3	66645	16884	15222	78037	62409	57136	101560	16260	31460	64144	84021	143320	89502	100120	65208	63779	66104	50840
pmb0639	5	C33H40O20	Apigenin-8-C-glucoside-7-O-Sophoroside	Flavonoids	Flavonoid carbonoside	-	3	2828.8	2218.6	1421.4	699.26	2688.7	2552	2919.2	979.13	6930.1	17112	19897	13924	47916	61809	41801	19930	16356	15486
Zmgp002857	8	C33H40O20	Quercetin-3-O-rhamnosyl (1→2)-[rhamnosyl (1→6)]glucoside	Flavonoids	Flavonols	-	2	1412400	108240	97162	1095700	1222000	2131200	1010300	176740	178950	6981900	6536200	6439000	8893200	10521000	12689000	6784800	6153600	6790200
Hmcp001559	8	C33H40O20	Isorhamnetin-3-O-rutinoside-7-O-arabinoside	Flavonoids	Flavonols	-	3	1226.7	1221.3	306.05	614.14	455.06	607.66	612.1	1828.2	300.93	7680.3	8581.6	2410.8	18770	12069	12212	5261.6	6151.9	4901.2
Lmsp003161	4	C33H40O20	Kaempferol-3-O-sophoroside-7-O-rhamnoside	Flavonoids	Flavonols	-	2	258270	385660	423630	763230	498130	476250	440640	438960	488970	6284.8	7215.7	11797	13337	2896.3	10418	10011	8289.2	14351
Lmpp003268	6	C33H40O20	Kaempferol-3-O-rutinoside-7-O-glucoside	Flavonoids	Flavonols	-	3	61860	24838	58960	90784	39914	48956	23098	31795	32776	25483	46406	59353	11157	40051	41886	15141	19941	40904
HJAP127	8	C33H40O20	Quercetin-3-O-(2''-O-Rhamnosyl)rutinoside	Flavonoids	Flavonols	55696-57-6	1	1271600	125950	102000	953680	1155100	2631600	1249700	143140	169890	6620400	5582700	5784100	7774000	11737000	10819000	6101600	6067300	6178300
Hmcp001329	8	C32H38O21	Quercetin-3-O-xylosyl(1→2)glucosyl(1→2)glucoside	Flavonoids	Flavonols	-	1	4491.2	261.95	252.22	251.56	1990.9	6293.9	372.69	238.15	251.43	13477	14439	6584.8	13720	26376	25174	18792	23896	12223
pmn001505	5	C41H64O13	Oleanolic acid-3-O-xylosyl(1→3)glucuronide	Terpenoids	Triterpene Saponin	-	2	170190	293020	253700	253830	241140	290930	230040	247020	341580	340490	215790	148000	297590	726490	833800	413870	343960	305240
Cmhp005457	4	C41H66O13	HN-saponin F;Pulsatilla saponin B；3-O-α-L-Arabinosylhederagenin-28-β-D-glucoside	Terpenoids	Triterpene Saponin	39524-13-5	2	28835	48682	51451	68691	43195	43838	37100	48866	38763	22558	10762	12888	9782.5	10194	18731	24335	24828	22249
Lmyp003588	4	C35H28O20	Quercetin-3-O-(2'',6''-digalloyl)-glucoside	Flavonoids	Flavonols	-	3	100100	6680.1	4432.6	34032	22752	35809	54699	17068	11232	2678.1	2685.6	3536	3588.9	5901.6	7202.8	4493.2	8515.4	1343
HJAP128	8	C34H42O20	Isorhamnetin-3-O-rutinoside-7-O-rhamnoside	Flavonoids	Flavonols	-	1	201590	58196	38830	246110	329710	443710	239280	76751	106970	466090	545850	430410	504020	903820	1446900	692790	510940	718660
Lmsp002982	8	C33H40O21	Quercetin-3-O-sophoroside-7-O-rhamnoside	Flavonoids	Flavonols	-	2	18087	3417.5	736.82	17812	37818	61675	23099	2697.5	8524.6	73813	54833	64313	111780	124330	143460	116800	69488	70684
Lmmp002334	8	C33H40O21	Quercetin-3-O-rutinoside-7-O-glucoside	Flavonoids	Flavonols	-	2	29255	9	9	21213	8289.5	47996	21948	4006.8	9	134880	168720	227520	268240	269170	246940	121810	131370	127940
Lmmp002755	8	C33H40O21	Quercetin-7-O-rutinoside-4'-O-glucoside	Flavonoids	Flavonols	-	3	45349	3360	522.5	41780	18502	46295	50746	8359.5	4500.8	322440	291390	379800	227920	270030	268530	314190	326820	287380
Hmmp006067	5	C42H68O13	Oleanolic acid-3-O-glucosyl(1→2)glucoside	Terpenoids	Triterpene Saponin	-	2	9	9	1987.4	1576	1058.5	3342.6	2088.9	9	2343.3	1757.5	1665.4	993.51	13089	19434	20560	6665.9	4614.1	2332.1
Hmcp001589	5	C34H42O21	Isorhamnetin-3-O-rutinoside-4'-O-glucoside	Flavonoids	Flavonols	111393-97-6	3	1668.9	1549.1	308.37	1224	931.64	10288	4600.5	925.11	2071.8	36332	31997	31407	104250	464490	862180	49863	60455	27483
pmb0620	8	C34H42O21	Chrysoeriol-6,8-di-C-glucoside-7-O-glucoside	Flavonoids	Flavonoid carbonoside	-	2	4205.9	9823.2	4438	9797.6	4061.4	4922.7	24970	13254	17672	10789	11141	23483	30741	23298	20105	18239	19136	18074
Lmhp003162	8	C34H42O21	Chrysoeriol-6,8-di-C-glucoside-4'-O-glucoside	Flavonoids	Flavonoid carbonoside	-	3	5299.7	3328.3	4627.4	2141	2562.5	529.82	4214.2	1754	3811.2	11973	19871	7213.2	19251	26727	11544	23158	17647	14280
pmn001535	12	C34H28O22	1,3,4,6-Tetra-O-Galloyl-D-Glucose	Tannins	Tannin	-	3	5129	10650	8735	10726	9239	16310	6982	7885.2	11209	14370	19472	26882	23132	21679	15831	18562	13963	5602
Lmwp005248	4	C42H46O22	Kaempferol-3-O-(6'''-p-Coumaroyl)glucosyl-(1→2)-Glucoside-7-O-Rhamnoside	Flavonoids	Flavonols	-	2	63083	109820	124170	113880	85706	102700	106470	125990	111250	285.19	288.86	213.1	714.21	434.93	1798.3	434.21	571.27	436.13
Zmcn006984	10	C47H76O17	Hederagenin 3-O-[β-D-glucosyl-(1-3)-a-L-rhamnopyransyl-(1-2)-a-L-arabinoside]	Terpenoids	Triterpene Saponin	-	2	74.005	9	75.973	150.63	9	150.96	145.63	70.397	510.47	72.857	159.57	151.33	72.734	218.98	224.06	73.8	227.26	148.01
HJAP136	8	C39H50O25	Quercetin-3-O-(2''-O-rhamnosyl)rutinoside-7-O-glucoside	Flavonoids	Flavonols	-	3	499.66	255.97	242.96	1239.8	746.9	1234.7	252.97	498.8	268.12	5541.3	3266.9	4794.2	2235.4	4225.3	11131	5658.5	6886.9	2224.4
Lmhp002374	8	C39H50O25	Quercetin-3-O-glucosyl(1→4)rhamnoside-7-O-rutinoside	Flavonoids	Flavonols	-	3	891.12	454.09	429.98	452.95	2655	4509.2	895.06	902.35	452.73	18965	13608	11672	14051	15353	18878	17588	22582	22715
HJAP123	8	C40H52O25	Isorhamnetin-3-O-rutinoside-7-O-rutinoside	Flavonoids	Flavonols	-	3	3897.3	4607.1	301.71	5096.4	11998	35042	8264.6	1706.4	2677.7	24383	26105	32451	55694	64161	59307	30560	40935	40845
MWS20196	8	C41H30O27	Chebulagic acid	Tannins	Tannin	23094-71-5	2	131850	55823	18000	198580	1400000	1190400	308850	76711	151410	1915900	1375200	2401600	4884500	4420300	4081300	2247200	2177500	1338300
Lmxn007617	4	C48H76O19	3-O-Rhamnosyl(1→2)glucosyl-2β,3β-dihydroxy-23-oxoolean-l2-en-28-oic acid-28-O-glucosyl ester	Terpenoids	Triterpene Saponin	-	1	2105.1	1579.9	1805.3	2417.2	1593.8	2935.4	2289.4	751.04	1981.6	521.86	747.8	832.95	380.26	685.33	222.13	1143.4	1215.9	748.51
