# Supplementary material for: Transcriptome and Metabolome Analyses Revealed the Response Mechanism of Quinoa Seedlings to Different Phosphorus Stresses
Source: Int J Mol Sci. 2022 Apr 24;23(9):4704. doi: 10.3390/ijms23094704 (PMC9105174; doi:10.3390/ijms23094704)
Supplement: Supplementary file 1 [file ijms-23-04704-s001.zip › Table.S4.xlsx]

## Sheet: Sheet1
Table S4. Metabolite data for all samples.
Index	Q1 (Da)	Q3 (Da)	Molecular Weight (Da)	Formula	Ionization model	Compounds	Class I	Class II	CAS	Level	W2-1	W2-2	W2-3	W4-1	W4-2	W4-3	W5-1	W5-2	W5-3	R2-1	R2-2	R2-3	R4-1	R4-2	R4-3	R5-1	R5-2	R5-3	mix01	mix02	mix03	mix04	mix05	mix06	mix07	mix08	cpd_ID	kegg_map
pme3200	74	57	73.064	C2H7N3	[M+H]+	1-Methylguanidine	Nucleotides and derivatives	Nucleotides and derivatives	471-29-4	3	20233	40125	41191	606.89	23553	32822	34896	92956	42316	62477	54472	49223	39360	44120	23213	51226	48902	62588	36716	53382	70344	41473	68940	60717	61205	34229	C02294	--
pmb0782	86.1	69.2	85.089	C5H11N	[M+H]+	Piperidine	Alkaloids	Piperidine alkaloids	110-89-4	3	2893500	2834000	2947700	7505000	8125400	4035200	3540400	3546500	3686800	5473000	3787800	5605200	7536100	6752900	6415600	5431600	3508700	4147400	4812500	5390000	5671000	6952600	5299500	5448400	5392600	5467000	C01746	ko00960
pme2292	89.11	72.08	88.1	C4H12N2	[M+H]+	Putrescine	Alkaloids	Alkaloids	110-60-1	3	402090	438160	494680	537670	533650	383690	436610	286770	460230	685360	514740	783950	561280	422410	368590	629510	464130	418170	550060	466590	508240	559720	470180	583080	478290	455040	C00134	ko00330,ko00472,ko00480,ko00960,ko01100,ko01110,ko02010
ML10198895	88.04	88.04	89.048	C3H7NO2	[M-H]-	N-Methylglycine	Amino acids and derivatives	Amino acids and derivatives	107-97-1	3	10046	6163.2	5089.8	7343	7883	11113	7359.8	9022.5	6728.5	6712.5	10183	8472.2	2806.2	9047	4479.5	7289.8	9619	4491	6754.5	3791.4	10142	6729.5	3339.5	3893	5112.5	7291.8	C00213	ko00260,ko00330,ko01100
pmf0096	88.99	70.9	89.995	C2H2O4	[M-H]-	Oxalic acid	Organic acids	Organic acids	144-62-7	3	17176	29063	11390	37092	21276	22585	37384	32485	36817	36439	45992	53364	17376	21774	22542	48823	32213	34740	39348	31041	39840	27220	28918	29764	36521	30463	C00209	ko00230,ko00630,ko01100
Lmgn000188	89.02	59.01	90.032	C3H6O3	[M-H]-	D-Lactic Acid	Organic acids	Organic acids	10326-41-7	3	7803.8	12335	8333.8	14062	12227	14970	9063.2	6508	16309	19002	12783	12358	8408.8	16291	8416	9788.2	7820.8	5903.5	6409.5	5841	8367	6179.5	5821.8	9167.5	12386	7178.5	C00256	ko00620,ko01100
pme2601	89	59	90.032	C3H6O3	[M-H]-	3-Hydroxypropanoic acid	Organic acids	Organic acids	503-66-2	3	71636	101270	71782	130650	110470	121550	69845	101600	86888	102470	90293	90668	72047	109640	83576	80421	72893	75157	61367	33801	59139	74003	67239	62747	60163	48603	C01013	ko00240,ko00410,ko00640,ko01100,ko01200
Lmlp001319	91.09	55.05	90.068	C4H10O2	[M+H]+	2,3-Butanediol	Others	Saccharides and Alcohols	513-85-9	3	9991.5	16120	24243	13203	8405.8	9805.1	105000	156060	91795	226720	139320	148320	8046.4	7984.2	18286	211420	167020	196270	26708	32218	21130	24528	38535	41048	36365	37959	C03044	ko00650
Lmqp000873	101.02	55.02	100.018	C4H4O3	[M+H]+	Succinic anhydride	Organic acids	Organic acids	108-30-5	3	1377500	1215800	1313600	1156700	1214200	1159900	1223100	1344600	1060700	1037100	875670	1092300	1180300	962600	1020900	1288000	1044100	1174300	1059900	1073900	1087100	1068500	1259500	1234500	1297400	1230300	C19524	--
MWSmce461	102.05	56.05	101.048	C4H7NO2	[M+H]+	L-Azetidine-2-carboxylic acid	Amino acids and derivatives	Amino acids and derivatives	2133-34-8	3	1245100	1468500	1348900	1413800	1533100	1204700	1655600	1602200	1411300	1469000	1368300	1440600	1144000	974320	858980	1589800	1606800	1552600	1024000	891870	934280	1032900	1122800	1032100	1146800	1027900	--	--
pmf0256	101.1	84.7	102.104	C6H14O	[M-H]-	3-Methyl-1-pentanol	Others	Saccharides and Alcohols	589-35-5	3	716060	891110	860270	1009800	1126100	1181800	2188900	1800700	2057100	762710	983740	1545900	1052400	1889900	2604600	1542700	1137100	1743900	1146700	1229000	1092100	1028500	982870	837140	966910	1033300	--	--
pme1841	103.12	86.1	102.116	C5H14N2	[M+H]+	Cadaverine	Alkaloids	Alkaloids	462-94-2	3	21148	26340	26346	17489	33649	21499	29077	23499	29246	27457	17693	21841	19141	18380	20016	19252	28692	22906	30000	28379	28730	23695	26237	32401	18173	29537	C01672	ko00310,ko00480,ko00960,ko01100,ko01110
pme3011	104.07	68.8	103.063	C4H9NO2	[M+H]+	γ-Aminobutyric acid	Organic acids	Organic acids	56-12-2	2	352420	334420	481380	291440	362730	220260	425540	435880	702400	476630	349270	407430	314330	214680	378310	1027800	843160	760970	1157400	1388900	1873600	1725900	1397600	1196900	1303500	1213800	C00334	ko00250,ko00330,ko00410,ko00650,ko00760,ko01100
pme3017	104.07	58	103.063	C4H9NO2	[M+H]+	2-Aminoisobutyric acid	Organic acids	Organic acids	62-57-7	2	4864100	5512600	5366500	3857500	4176100	3838000	5345400	5658300	5320600	4958600	5801700	6520800	5950400	6306000	5316600	5624500	6169300	6025000	3884800	4216000	4733000	4640200	4627300	4135500	4446100	4508600	C03665	--
pme3033	104.07	86	103.063	C4H9NO2	[M+H]+	N,N-Dimethylglycine	Amino acids and derivatives	Amino acids and derivatives	1118-68-9	2	507240	566850	690460	466750	534780	395840	603520	689450	679960	688560	612610	766670	648710	579210	545470	1138700	703940	797620	970060	984950	1083200	1211200	1088900	1022400	1115100	1088000	C01026	ko00260,ko01100
ML10172161	103	59.01	104.011	C3H4O4	[M-H]-	Hydroxypyruvic acid*	Organic acids	Organic acids	1113-60-6	3	18509	22000	19976	40424	22729	43994	28940	19586	25060	17853	14174	33967	69042	67982	41796	33174	18862	18861	40296	60683	54770	57657	34786	64667	47970	45363	C00168	ko00260,ko00630,ko01100,ko01110,ko01200
Lmbn000193	103	59.01	104.011	C3H4O4	[M-H]-	Tartronate semialdehyde*	Organic acids	Organic acids	2480-77-5	3	21826	25484	10767	26522	37508	64358	21914	30445	11296	24351	7023.2	32419	70718	86240	70350	24588	26680	14336	59478	70781	60300	67770	59354	57412	49684	65839	C01146	ko00053,ko00630,ko01100
mws0576	103.04	59.1	104.047	C4H8O3	[M-H]-	3-Hydroxybutyric acid	Organic acids	Organic acids	300-85-6	2	96684	98768	161200	43427	14815	21478	79602	136840	94837	38909	104930	70759	48890	6965.9	13838	163690	68343	147220	179890	319310	282690	203170	272200	260270	296970	327710	C01089	ko00072,ko00650,ko01100
pme1975	103	59	104.06	C3H4O4	[M-H]-	Malonic acid	Organic acids	Organic acids	141-82-2	3	110170	126860	117760	239480	161070	264530	117120	123120	149630	135560	152250	160630	504160	386660	368540	187080	144320	158190	326150	334200	342320	381090	352790	364460	394130	329640	C00383	ko00061,ko00240,ko00410,ko01100,ko01212
pmb0484	104.1	60.1	104.107	C5H14NO+	[M]+	Choline	Alkaloids	Alkaloids	62-49-7	2	32556000	36202000	38779000	29499000	32402000	29105000	34036000	35950000	36347000	36685000	39591000	39353000	42562000	39855000	37393000	34787000	39133000	40191000	31149000	31064000	31076000	34699000	35081000	34435000	33420000	35251000	C00114	ko00260,ko00564,ko01100,ko02010
pme0010	106	60	105.043	C3H7NO3	[M+H]+	L-Serine	Amino acids and derivatives	Amino acids and derivatives	56-45-1	3	1502100	1507400	1844500	2624100	2731100	1563400	1935900	1997900	2231900	1755500	1325500	1835700	1399500	1390100	2036100	3181800	2071000	2273500	1848600	1624000	1798900	1628000	1959300	1972900	2143200	2124000	C00065	ko00260,ko00261,ko00270,ko00460,ko00600,ko00630,ko00920,ko00970,ko01100,ko01110,ko01200,ko01230,ko02010
mws0267	105.02	88	106.027	C3H6O4	[M-H]-	DL-Glyceric Acid	Organic acids	Organic acids	473-81-4	3	55459	72492	94043	97154	78460	60887	113230	58219	38007	89570	59729	65618	51988	105980	58664	57706	47254	73680	112890	77285	79612	59192	63756	83678	115030	90533	C00258	ko00030,ko00260,ko00561,ko00630,ko01100,ko01110,ko01200
MWS1776	109.06	65.04	108.058	C7H8O	[M+H]+	m-Cresol	Phenolic acids	Phenolic acids	108-39-4	3	16992	19709	19043	1266.5	1411.1	6312.2	23910	13281	22760	20300	13241	15527	897.51	3824.1	1807.5	28082	25612	18413	13215	10999	20867	11443	15375	15100	11362	10850	C01467	--
mws1358	109.03	81	110.037	C6H6O2	[M-H]-	Pyrocatechol	Phenolic acids	Phenolic acids	120-80-9	2	6599.5	25318	11324	22114	36036	29210	10338	9935.4	14128	10857	4257.1	5170.6	13589	35397	32947	4221.1	944.59	2826.9	20275	23035	25111	21308	24496	27283	18466	31898	C00090	ko01100
mws0601	110.02	66	111.032	C5H5NO2	[M-H]-	Pyrrole-2-carboxylic acid	Organic acids	Organic acids	634-97-9	3	6530	5887.2	11531	17746	9062.4	9190.6	21325	11836	3967	6530	11536	20919	13494	11274	5026.9	5429.2	17698	12635	12453	9107.2	16603	13054	3775.6	8263.5	9572.5	10109	C05942	ko00330
mws0255	112.05	95	111.043	C4H5N3O	[M+H]+	Cytosine	Nucleotides and derivatives	Nucleotides and derivatives	71-30-7	1	5147900	6470100	5408300	8505100	5699000	5891400	7422400	6750500	13020000	14772000	15636000	16814000	11133000	8139900	7018800	12941000	12478000	12639000	6061100	6334300	6581800	6678300	7169900	7633500	7705800	7606100	C00380	ko00240,ko01100
MWS5173	112.05	70.03	111.043	C4H5N3O	[M+H]+	Isocytosine	Nucleotides and derivatives	Nucleotides and derivatives	108-53-2	3	2681.2	7618.8	12721	15368	14223	9488.3	6747.9	8136.7	5613.1	7373.5	9901.5	11993	27313	27670	126230	14908	9389.9	11680	10742	16844	14332	22927	16513	14477	27569	20457	--	--
pme2122	112.09	95	111.08	C5H9N3	[M+H]+	Histamine	Alkaloids	Alkaloids	51-45-6	1	1192500	1195500	903650	1637100	1149400	997890	1521100	1245100	2164700	3451500	3391300	3021500	2660000	2016400	2004200	3427400	3075100	2470400	1741600	1660800	1574900	1686800	1759500	1823200	2023800	1825600	C00388	ko00340,ko01100,ko01110
pme0257	111.02	80	112.027	C4H4N2O2	[M-H]-	Uracil	Nucleotides and derivatives	Nucleotides and derivatives	66-22-8	3	155470	215920	194770	192940	154460	167580	194110	208750	234440	210350	162340	202780	112040	141570	151060	183310	164990	179060	215550	148510	178630	190070	231560	224950	267080	233460	C00106	ko00240,ko00410,ko00770,ko01100
MWS5172	113.06	68.99	114.068	C6H10O2	[M-H]-	2-Methyl-4-pentenoic Acid	Organic acids	Organic acids	1575-74-2	3	42787	36213	42779	52358	42676	41684	57631	62391	60968	40349	69672	43924	42110	67218	79496	59052	55107	76334	36591	35672	45586	38792	47518	32181	60322	47014	--	--
pme0006	116.07	70.1	115.063	C5H9NO2	[M+H]+	L-Proline	Amino acids and derivatives	Amino acids and derivatives	147-85-3	1	12463000	13005000	13309000	8347100	9737200	8761700	12885000	15236000	17416000	14266000	14461000	16457000	11825000	9450300	9187500	22022000	18869000	18363000	11131000	10896000	12186000	12170000	11075000	12694000	12707000	11949000	C00148	ko00330,ko00332,ko00970,ko01100,ko01110,ko01230,ko02010
mws0376	115	71	116.011	C4H4O4	[M-H]-	Fumaric acid	Organic acids	Organic acids	110-17-8	3	555790	709190	702100	1338200	1749500	937680	528440	1411900	717470	810830	427100	861040	1429300	627950	899530	721120	1004200	895290	626920	1002600	830540	871950	699840	744140	897800	920460	C00122	ko00020,ko00190,ko00220,ko00250,ko00350,ko00360,ko00620,ko00650,ko00760,ko01100,ko01110,ko01200
pme3193	116.04	74	117.043	C4H7NO3	[M-H]-	N-Acetyl-L-glycine	Amino acids and derivatives	Amino acids and derivatives	543-24-8	3	27126	34942	33796	31738	32312	18753	34981	28291	38966	25556	31347	25989	33532	22093	22005	31187	55195	31179	31809	37418	50955	44897	34437	37948	49426	46907	--	--
pme0066	116.1	74	117.054	C3H7N3O2	[M-H]-	Guanidinoacetate	Alkaloids	Alkaloids	352-97-6	3	4937.5	6922.2	5166.7	3637.2	6899.8	6034	3350.4	6228.6	7502.9	6874.3	6376.4	7343.6	6748.4	6463	3638.6	6024.9	8885.7	3643	8418.3	7508.3	6683.2	8831	6879.2	7783.1	8386.2	7210.3	C00581	ko00260,ko00330,ko01100
pmb1096	118.07	91	117.058	C8H7N	[M+H]+	Indole	Alkaloids	Plumerane	120-72-9	1	9612.1	8117.5	6563	22270	20612	11265	9070.1	10297	15138	12784	8455.6	21698	38979	22211	25090	12476	10767	11775	14692	17295	14098	21197	29947	23203	25076	24558	C00463	ko00380,ko00400,ko00402,ko01100,ko01110
MWSmce548	118.09	58.07	117.079	C5H11NO2	[M+H]+	Betaine	Alkaloids	Alkaloids	107-43-7	1	6533200	8277300	7443800	13029000	12590000	10097000	7389200	7119200	7693000	6705300	7854600	9630600	12406000	14148000	11452000	7148100	5770400	6409600	10745000	9236000	9627300	8554100	9818200	10018000	10245000	10748000	C00719	ko00260,ko01100,ko02010
MWS5209	235.16	118.09	117.079	C5H11NO2	[2M+H]+	N-Methyl-α-aminoisobutyric acid	Amino acids and derivatives	Amino acids and derivatives	2566-34-9	1	24710000	28967000	37142000	41437000	48777000	56409000	26097000	24347000	28715000	33307000	29203000	35984000	52559000	37603000	57306000	23688000	23368000	22316000	50542000	46997000	47604000	52857000	48690000	40134000	58696000	44240000	--	--
mws0256	118.09	72.1	117.079	C5H11NO2	[M+H]+	L-Valine	Amino acids and derivatives	Amino acids and derivatives	72-18-4	2	7546100	8112000	7779700	11769000	13422000	7007600	10110000	9732500	10097000	11875000	9430500	11866000	8050100	7171700	8090500	13550000	9671500	10583000	9190700	9311200	9785300	10250000	9925100	10684000	10225000	10012000	C00183	ko00280,ko00290,ko00311,ko00460,ko00770,ko00966,ko00970,ko01100,ko01110,ko01210,ko01230,ko02010
pme0120	118.09	101	117.079	C5H11NO2	[M+H]+	5-Aminovaleric acid	Organic acids	Organic acids	660-88-8	3	30162	41681	29928	16057	26940	20982	31572	44306	39554	39157	36094	46733	37104	25972	30297	60557	48807	54262	43498	32041	45238	34263	42120	38347	41495	50777	C00431	ko00310,ko00330,ko01100
mws0470	117.02	73	118.027	C4H6O4	[M-H]-	Methylmalonic acid*	Organic acids	Organic acids	516-05-2	1	35295000	42925000	40850000	36395000	36055000	30718000	37356000	40981000	35200000	34474000	28673000	33504000	33875000	32580000	26989000	41556000	32905000	42196000	31071000	35986000	31891000	34741000	34304000	34526000	33451000	34566000	C02170	ko00240,ko00280,ko00640,ko01100
pme1730	117	59	118.027	C4H6O4	[M-H]-	D-Erythronolactone	Organic acids	Organic acids	15667-21-7	3	391750	494250	405710	626300	627680	570150	585530	494010	394810	677780	451890	659570	306800	576250	434890	528650	368510	335320	289710	210310	243430	251120	237040	269910	230960	211940	--	--
mws0192	117.02	73	118.027	C4H6O4	[M-H]-	Succinic acid*	Organic acids	Organic acids	110-15-6	1	39957000	44804000	39612000	35370000	43370000	34834000	40985000	42455000	37578000	33723000	32263000	36351000	37507000	31201000	33046000	44439000	33809000	42100000	33667000	36712000	34062000	35298000	38033000	37281000	34521000	35378000	C00042	ko00020,ko00190,ko00250,ko00310,ko00350,ko00360,ko00620,ko00630,ko00640,ko00650,ko00760,ko00920,ko01100,ko01110,ko01200
mws0147	117.06	59	118.063	C5H10O3	[M-H]-	β-Hydroxyisovaleric acid	Organic acids	Organic acids	625-08-1	1	301000	323860	336270	243140	206130	208640	324430	342920	335730	364950	346860	308490	269410	245680	261210	368990	342670	353520	296790	326220	315080	320610	315830	309220	298810	300090	C20827	ko00280,ko01100
pme3096	118	74	119.022	C3H5NO4	[M-H]-	Aminomalonic acid	Organic acids	Organic acids	1068-84-4	3	1763400	2199900	1806500	1361800	1407100	1593300	1648100	1842000	1702000	1428600	1443300	1568100	1535000	1418500	1538400	1982700	1442800	1845800	1462700	1531100	1390000	1297600	1508000	1668400	1514600	1358800	C00872	--
mws0671	120.07	74.1	119.058	C4H9NO3	[M+H]+	L-Homoserine*	Amino acids and derivatives	Amino acids and derivatives	672-15-1	3	1335500	1538400	1440200	2222600	2505600	1554400	1636900	1557400	1447000	1898000	1572600	2047400	1992500	1627300	1828100	1819600	1734000	1929700	1681100	1651600	1779300	1872700	1795700	1781200	1595700	1679900	C00263	ko00260,ko00270,ko00300,ko00920,ko01100,ko01110,ko01230
mws0230	120.07	74	119.058	C4H9NO3	[M+H]+	L-Threonine*	Amino acids and derivatives	Amino acids and derivatives	72-19-5	3	1407200	1600500	1662200	2527200	2541800	1494300	1909500	1675300	1619700	1776200	1611000	2333300	1887600	1965300	1791700	2297600	1607500	1827600	1773900	1698000	1749800	1757200	1893700	1879200	1724800	1893100	C00188	ko00260,ko00261,ko00290,ko00860,ko00970,ko01100,ko01110,ko01230,ko02010
pmp001287	120.08	103.05	119.073	C8H9N	[M+H]+	N-Benzylmethylene isomethylamine	Alkaloids	Alkaloids	-	1	8694900	9262500	9386400	8690800	9654700	7026700	11536000	11022000	10123000	9950200	6838000	7846800	7607100	7326200	7993700	9133000	6597100	7372300	8171300	8426000	8172300	8725100	9256400	9755700	9668700	9922800	--	--
pma0134	121.04	93.06	120.042	C4H8O4	[M+H]+	D-Threose	Others	Saccharides and Alcohols	95-43-2	3	164840	192320	217180	323800	362710	307040	178810	168130	191790	126940	133920	177760	170680	134660	108240	111700	92317	96490	244100	214170	233600	291640	242070	245460	270310	288030	C06463	--
MWS4305	119.04	59.01	120.042	C4H8O4	[M-H]-	Erythrose	Others	Saccharides and Alcohols	583-50-6	3	14433000	15839000	17358000	16165000	17520000	16289000	17061000	16745000	16989000	17901000	16527000	17509000	21887000	20547000	15537000	16800000	15978000	22607000	16529000	18561000	17151000	16338000	14573000	14080000	15169000	15798000	C01796	--
Lmbn002644	119.05	93.03	120.058	C8H8O	[M-H]-	4-Methylbenzaldehyde	Others	Others	104-87-0	2	58768	103860	102180	55434	103800	76294	108470	164640	48149	79464	48429	115460	71348	44462	40199	45568	38758	80060	48124	49612	46629	51365	45073	62886	59234	48934	C06758	ko01100
pme0195	120.02	62	121.02	C3H7NO2S	[M-H]-	L-Cysteine	Amino acids and derivatives	Amino acids and derivatives	52-90-4	3	28346	26470	21678	16763	14407	9330.5	15188	27839	19602	19737	20069	28234	24698	20141	20727	11657	14456	14244	37765	36896	42734	33277	38431	28623	36356	38591	C00097	ko00260,ko00270,ko00311,ko00332,ko00430,ko00460,ko00480,ko00730,ko00770,ko00920,ko00970,ko01100,ko01110,ko01200,ko01230,ko04122
pmb0069	122	105	121.053	C7H7NO	[M+H]+	Benzamide	Phenolic acids	Phenolic acids	55-21-0	3	65753000	101740000	99269000	108070000	106470000	109150000	78342000	60096000	81066000	38671000	39073000	36398000	26553000	26604000	19409000	29333000	24164000	27683000	37989000	37858000	39289000	38853000	40492000	41654000	41477000	40273000	C09815	--
MWSslk106	122.1	105.07	121.089	C8H11N	[M+H]+	2-Phenylethylamine	Alkaloids	Benzylphenylethylamine alkaloids	64-04-0	1	69889000	105930000	93143000	103390000	111760000	114080000	85335000	63128000	69472000	41075000	41121000	39097000	29580000	29340000	20700000	29949000	25054000	29518000	38748000	40107000	40166000	40007000	41817000	43145000	40933000	43370000	C05332	ko00360,ko01100
mws0628	121.03	92	122.037	C7H6O2	[M-H]-	4-Hydroxybenzaldehyde	Phenolic acids	Phenolic acids	123-08-0	1	594900	881150	708700	701900	720630	696080	905680	866280	831810	700610	678360	783040	1024000	894690	812540	878740	628880	697250	732730	775260	791680	751140	738670	764540	799300	770680	C00633	ko01100
Lmbn001930	121.03	77.04	122.037	C7H6O2	[M-H]-	2-Hydroxybenzaldehyde (Salicylaldehyde)	Phenolic acids	Phenolic acids	90-02-8	2	68599	57181	69108	46916	56450	45283	50317	60541	58142	48507	35110	44576	55151	47677	44456	36489	32971	47634	49183	49876	40281	40154	53790	42565	47725	27598	C06202	ko01100
pme0241	123.04	79	122.037	C7H6O2	[M+H]+	Benzoic acid	Phenolic acids	Phenolic acids	65-85-0	3	44668	32950	50158	23701	53181	51926	35967	71291	75226	45971	57013	93391	31924	38319	51368	45011	53904	52465	52957	66478	38818	32442	36998	58783	57322	66278	C00180	ko00360,ko01100,ko01110
mws0133	123.06	80.05	122.048	C6H6N2O	[M+H]+	Nicotinamide	Others	Vitamin	98-92-0	1	4950000	5924400	5868300	4865800	5896600	5890200	5822900	7143700	5032000	5286000	4774000	5968300	6029300	4586100	3825800	5051000	5152800	5365800	4746500	4904200	4946800	4931100	5341100	5599800	5671500	5678500	C00153	ko00760,ko01100
MWSmce207	123.05	81.04	122.048	C6H6N2O	[M+H]+	Acetylpyrazine	Others	Others	22047-25-2	3	23372	23597	11656	37861	36107	44050	33590	14760	28257	27449	29909	22703	45049	35476	32662	29289	26138	24824	18721	17446	15675	23037	33530	26592	27335	18375	--	--
pme2134	121	59	122.058	C4H10O4	[M-H]-	D-Threitol	Others	Saccharides and Alcohols	2418-52-2	3	1090400	982060	799370	1295100	1239700	1301700	1258000	1222300	1083400	1131200	1309400	1152700	1388400	1503000	1436600	1184900	1129100	1370100	1009400	1166800	1195200	838570	1070800	1095000	1021800	1207100	C16884	--
MWSmce039	124.04	84.05	123.032	C6H5NO2	[M+H]+	Isonicotinic acid	Others	Vitamin	55-22-1	3	5544.1	10241	13706	15047	12962	6518.2	19526	18014	19057	7492.9	10107	6980.3	4864.4	3989.2	10248	15030	16074	15541	11554	9558.3	11207	13136	14747	17004	24533	14710	C07446	--
pme0490	124.04	78	123.032	C6H5NO2	[M+H]+	Nicotinic acid (Vitamin B3)	Others	Vitamin	59-67-6	1	347800	349400	389760	504850	648320	507470	359510	368620	374710	344110	301900	404290	471880	417590	378110	257300	219060	277090	690840	734230	782450	849830	713500	742170	693970	689390	C00253	ko00760,ko00960,ko01100,ko01110
pme1216	122.03	78	123.032	C6H5NO2	[M-H]-	2-Picolinic acid	Organic acids	Organic acids	98-98-6	3	114020	119510	84363	157890	179000	149870	119630	120840	111980	101460	84482	125830	135870	75420	92392	77728	81667	71303	214530	266960	229120	225830	220250	232940	263970	234260	C10164	ko00380,ko01100
pmb0302	126.1	96	125.024	C2H8NO3P	[M+H]+	2-Aminoethylphosphonate	Lipids	Glycerol ester	2041-14-7	3	56648	55865	56018	64836	62468	75753	62890	51514	58801	70335	80056	81162	111540	121520	88442	87871	87081	83378	58094	54153	50897	59944	51696	49570	38595	57986	C03557	ko00440,ko01100,ko02010
pmp001086	127.04	97	126.032	C6H6O3	[M+H]+	5-Hydroxymethylfurfural	Others	Others	67-47-0	3	74698	78092	74785	84433	65294	108710	78610	35479	75071	56811	67218	63062	123510	75050	97874	85889	118870	73370	191050	199590	166240	93982	174150	142780	182730	203810	C11101	--
mws0251	127.05	110	126.043	C5H6N2O2	[M+H]+	Thymine	Nucleotides and derivatives	Nucleotides and derivatives	65-71-4	3	28755	93886	93543	26435	54308	46845	109880	154620	36776	73733	23569	101300	39759	16120	29023	22997	22445	70062	57192	57158	53477	56607	57697	48478	56153	57859	C00178	ko00240,ko01100
MWSmce448	127.05	81.04	126.043	C5H6N2O2	[M+H]+	Imidazol-1-yl-acetic acid*	Organic acids	Organic acids	22884-10-2	2	63712	100000	41868	61046	55474	86552	68344	91602	104820	83336	99047	78531	141090	95026	63826	93498	221200	140120	94159	99319	181110	126020	139990	145750	121540	91928	--	--
MWSmce118	127.05	81.04	126.043	C5H6N2O2	[M+H]+	Imidazole-4-Acetic Acid*	Organic acids	Organic acids	645-65-8	2	50435	32278	64065	54929	63403	100170	176940	79742	152470	88776	139190	83946	141980	69475	81394	132800	146710	125860	129060	103800	172430	115200	103560	121540	122150	127470	C02835	ko00340,ko01100
MWSmce709	130.06	103.05	129.058	C9H7N	[M+H]+	Isoquinoline	Alkaloids	Isoquinoline alkaloids	119-65-3	2	104050	121780	122110	27420	29120	48361	125690	151180	137420	104200	90135	58697	26413	36235	36487	92641	74241	76898	62212	39304	54720	65002	47011	50693	30715	45559	C06323	--
ML10181668	130.09	84.08	129.079	C6H11NO2	[M+H]+	Cycloleucine	Amino acids and derivatives	Amino acids and derivatives	52-52-8	1	7060200	7562900	8019800	12819000	13063000	5996200	8681600	9180300	10633000	7053900	7379800	14063000	7811500	5312400	5599500	10566000	8022700	8906600	9567600	9864800	9693300	9897400	9619200	9994300	9671600	9541900	C03969	--
MWS0811	130.09	84.08	129.079	C6H11NO2	[M+H]+	DL-Pipecolic Acid	Organic acids	Organic acids	3105-95-1	1	1566200	1530700	1916800	1734700	1466500	1063400	1765000	1792500	2369100	927910	910390	2424400	1239100	630730	812400	1420600	1394200	1172300	1966800	2156200	2185900	2826600	2159900	2322400	2136200	2365800	C00408	ko00310,ko00960,ko01100,ko01110
Zmdp000376	130.09	84.08	129.09	C5H11N3O	[M+H]+	4-Guanidinobutanal	Others	Others	-	2	7642200	8799900	9940500	14320000	16359000	7533200	10447000	10486000	10932000	7856900	6853400	12700000	8439800	5624800	5904200	11063000	9100400	8576300	10271000	9390000	9858200	8575500	10409000	10552000	11003000	11177000	--	--
Zmgn000217	129.02	85.03	130.027	C5H6O4	[M-H]-	Methylenesuccinic acid	Organic acids	Organic acids	97-65-4	3	8874	11194	5874.8	9328.8	6032.2	10650	10488	6414.8	1811.8	8802.8	1022.8	11990	2032.5	10474	10589	10432	9827.5	7225.8	12425	14882	17375	26152	18335	14231	17440	15069	C00490	ko00660,ko01100
mws0425	129.02	85	130.027	C5H6O4	[M-H]-	Citraconic acid	Organic acids	Organic acids	498-23-7	3	43703	62412	61093	35338	36781	63572	71686	73404	34565	39597	14562	44527	14404	18339	14835	18568	24073	33604	76551	68134	52736	77684	56128	62362	53875	53018	C02226	ko00290,ko00660,ko01100,ko01210
pme2693	131.12	114.09	130.111	C6H14N2O	[M+H]+	N-Acetylputrescine	Alkaloids	Alkaloids	18233-70-0	3	12004	20943	8868.5	17135	14526	10096	16840	12957	18523	16251	13239	16252	28776	22231	21872	23761	16760	19558	28233	25378	26533	31864	27939	27046	27752	33153	C02714	ko00330,ko01100
pmf0470	132.07	73	131.058	C5H9NO3	[M+H]+	cis-4-Hydroxy-D-proline	Amino acids and derivatives	Amino acids and derivatives	2584-71-6	3	133110	124540	98312	132120	184310	127110	107750	170650	120800	163410	158050	169780	146960	122930	180200	172340	136990	95379	202890	88827	74544	102130	89055	160600	155460	150750	C03440	ko00330,ko01100
mws0216	132.07	86	131.058	C5H9NO3	[M+H]+	Trans-4-Hydroxy-L-proline	Amino acids and derivatives	Amino acids and derivatives	51-35-4	2	18290000	17969000	20419000	50003000	54701000	23934000	23014000	25171000	25509000	33107000	22679000	30268000	44583000	30019000	33464000	33424000	20787000	25149000	30407000	27113000	29257000	28721000	30916000	32454000	32085000	31833000	C01157	ko00330,ko01100,ko02010
MWS2413	130.05	58.03	131.058	C5H9NO3	[M-H]-	N-acetyl-beta-alanine	Amino acids and derivatives	Amino acids and derivatives	3025-95-4	3	9761.5	8580.8	6343.5	7213.3	6155.6	9690	9233.9	6952.2	6149.8	5232.8	9758.9	8666.8	5929.5	9269.7	8066.1	8658.5	9665.5	15399	14172	11867	12422	21237	17150	18744	17314	13505	C01073	ko00410
Zmpn000638	130.05	88.04	131.069	C4H9N3O2	[M-H]-	3-Guanidinopropionic acid	Organic acids	Organic acids	353-09-3	3	74504	59227	75230	65531	68781	61807	46434	58865	66845	60375	67650	64291	66345	60108	67779	74979	81148	63366	95958	81190	112390	130980	118260	104380	104070	99770	C03065	--
pmp001198	132.1	57.1	131.095	C6H13NO2	[M+H]+	6-Deoxyfagomine	Alkaloids	Piperidine alkaloids	197449-09-5	1	3130600	3056300	3335300	7741300	9063000	4421000	3858100	4134000	4421200	5626800	4140000	6129300	8124300	7388300	6928500	5734600	3719800	4167100	5154800	6054700	5884500	7354300	5488800	5674300	5523300	5872500	--	--
mws0227	132.1	86.2	131.095	C6H13NO2	[M+H]+	L-Leucine*	Amino acids and derivatives	Amino acids and derivatives	61-90-5	1	554140	599440	608570	1480500	1670900	885360	714950	699090	767180	993470	740460	1081300	1413900	1344500	1406800	1051600	671310	775220	985430	1007300	1063400	1304800	961070	871040	964620	1017000	C00123	ko00280,ko00290,ko00966,ko00970,ko01100,ko01110,ko01210,ko01230,ko02010
pme0274	132.1	69	131.095	C6H13NO2	[M+H]+	6-Aminocaproic acid	Organic acids	Organic acids	60-32-2	2	387010	417240	424280	1118400	1248800	574100	460820	486110	558690	751830	541160	782440	1165200	855000	855060	681850	426620	544860	694470	618700	602110	688030	630720	692460	673160	698010	C02378	ko01100
mws0258	132.1	86	131.095	C6H13NO2	[M+H]+	L-Isoleucine*	Amino acids and derivatives	Amino acids and derivatives	73-32-5	1	255940	224660	262490	479930	466490	336150	314410	312210	299330	300540	271660	263040	437490	336580	342780	391810	273060	366450	270250	368330	302490	271840	342610	301100	338350	327030	C00407	ko00280,ko00290,ko00460,ko00960,ko00966,ko00970,ko01100,ko01110,ko01210,ko01230,ko02010
mws1587	132.1	86	131.095	C6H13NO2	[M+H]+	L-Norleucine	Amino acids and derivatives	Amino acids and derivatives	327-57-1	1	262370	247000	274260	489150	521940	305360	316780	324010	301550	351400	268900	277450	417620	323980	435670	445160	286700	315830	313430	273580	354660	257380	334650	325720	331840	279820	C01933	--
mws1167	131	59.2	132.006	C4H4O5	[M-H]-	Oxaloacetic acid	Organic acids	Organic acids	328-42-7	3	48980	30992	58792	121170	137870	122390	89261	61696	87734	219020	229080	260490	93575	239430	169710	209420	172120	194020	156400	158640	168500	153700	187060	159630	185910	184680	C00036	ko00010,ko00020,ko00250,ko00620,ko00630,ko00710,ko01100,ko01110,ko01200,ko01210,ko01230
Lmmn002164	131.03	87.05	132.042	C5H8O4	[M-H]-	Monomethyl succinate*	Organic acids	Organic acids	3878-55-5	1	89629	93736	100820	71653	70231	84905	72655	89943	90626	112560	96184	81809	94123	79442	67846	100960	87758	102940	72884	93928	94187	84219	84372	91590	91559	86377	--	--
Lmbn001288	131.03	87.04	132.042	C5H8O4	[M-H]-	2-Hydroxy-2-methyl-3-oxobutanoic acid	Organic acids	Organic acids	71698-08-3	1	54822	57553	58895	50622	51612	47715	51406	65025	46737	60858	76179	57029	60468	52152	50538	69539	66079	67436	56024	61868	58156	62619	73548	68269	59421	48286	C06010	ko00290,ko00650,ko00660,ko00770,ko01100,ko01110,ko01210,ko01230
mws0473	131.03	87.05	132.042	C5H8O4	[M-H]-	2-Methylsuccinic acid*	Organic acids	Organic acids	498-21-5	1	808930	826780	956640	713550	690620	664110	709680	817140	745810	932900	985730	787270	884060	782270	694450	958070	874840	956690	847200	852900	883330	867030	852230	890790	883180	886300	--	--
Lmmn000806	131.03	87.05	132.042	C5H8O4	[M-H]-	Dimethylmalonic acid*	Organic acids	Organic acids	595-46-0	1	81062	86002	88973	68453	77729	75504	75990	77842	71066	83459	93522	82669	86010	85040	74074	92437	83385	92758	86861	80030	90265	87599	94514	96930	97247	78373	--	--
pme0243	131.03	87.05	132.042	C5H8O4	[M-H]-	Glutaric acid	Organic acids	Organic acids	110-94-1	3	236680	225030	209640	264060	271950	190980	203720	270530	256250	242910	222940	186550	336790	300840	298490	303110	264290	304630	838380	856190	820250	911670	873140	900320	893920	867650	C00489	ko00071,ko00310,ko01100
pme3034	131.03	69.03	132.042	C5H8O4	[M-H]-	Ethylmalonic acid	Organic acids	Organic acids	601-75-2	3	1144	7420.3	3085.7	361.46	3316.2	5697	8326.8	4292.5	3991.5	667.21	1873.8	5619.7	11262	2549.7	7103.3	1710.8	11647	8230.1	38113	34549	27805	38509	29969	27595	25283	29087	--	--
Lmgn000160	131.05	70.03	132.053	C4H8N2O3	[M-H]-	3-Ureidopropionic Acid	Organic acids	Organic acids	462-88-4	1	7506	6813.8	10241	47929	79869	23615	3411	10868	5947.5	12018	10786	13215	28034	14841	21140	15391	14363	9579.8	14276	13008	17158	7378.2	13035	14284	17719	21334	C02642	ko00240,ko00410,ko00770,ko01100
mws0972	131.07	85	132.079	C6H12O3	[M-H]-	6-Hydroxyhexanoic acid	Organic acids	Organic acids	1191-25-9	1	2349000	2265800	2096900	487270	744430	1404300	1595100	4215700	3889100	1653600	1952800	2902000	281650	633980	325730	1901700	2710200	1891000	1280200	1302000	1299200	1289200	1414100	1283000	1267800	1320600	C06103	--
Lmrn002746	131.07	85.07	132.079	C6H12O3	[M-H]-	2-Hydroxy-4-methylpentanoic acid	Organic acids	Organic acids	498-36-2	1	13364	23025	14028	62535	62669	38547	18996	13439	19902	154120	143990	154340	215780	243160	251160	147660	138180	152000	82964	102240	95925	106150	120510	110570	127450	119980	--	--
mws0341	131.07	85	132.079	C6H12O3	[M-H]-	2-Hydroxyisocaproic acid	Organic acids	Organic acids	20312-37-2	1	55289	31106	67464	73077	73750	60338	50950	51418	45188	111390	71716	89523	117970	61100	140420	142160	81805	115090	160560	108600	139890	137670	155300	162730	168520	166800	C03264	--
pme2527	133	116	132.09	C5H12N2O2	[M+H]+	L-Ornithine	Amino acids and derivatives	Amino acids and derivatives	70-26-8	3	25111	43657	41553	49408	49345	27774	46402	34423	36893	81003	38888	55842	41497	35875	115390	82899	34423	50454	54387	50372	49451	41173	50254	48086	51323	49575	C00077	ko00220,ko00330,ko00472,ko00480,ko01100,ko01110,ko01210,ko01230,ko02010
mws0219	132.03	88	133.038	C4H7NO4	[M-H]-	L-Aspartic Acid	Amino acids and derivatives	Amino acids and derivatives	56-84-8	1	10263000	12458000	11832000	10793000	10253000	8977400	11935000	11671000	12070000	10463000	12581000	8473200	6902200	6668500	5847100	12602000	13805000	12444000	8154200	8648900	7727800	8057200	8498400	8830900	8386700	9113600	C00049	ko00220,ko00250,ko00260,ko00261,ko00270,ko00300,ko00340,ko00410,ko00460,ko00710,ko00760,ko00770,ko00970,ko01100,ko01110,ko01200,ko01210,ko01230,ko02010
MWS1882	132.03	88.04	133.038	C4H7NO4	[M-H]-	Iminodiacetic acid	Organic acids	Organic acids	142-73-4	1	1427600	1486000	1618600	1252600	1413600	1191600	1315200	1503400	1425500	1191800	1411800	1059400	933570	809340	640090	1670200	1808200	1722800	1058500	1110100	939580	1030300	1008100	1028800	923790	1082200	C19911	--
Lmbn000198	133.01	71.01	134.022	C4H6O5	[M-H]-	3-Dehydro-L-Threonic Acid*	Organic acids	Organic acids	-	1	6670200	7291800	6982400	8679100	9624300	12762000	9542700	7789200	9684200	7720600	7846100	6059200	17961000	16650000	16614000	9843500	7325100	8129200	14328000	14315000	15550000	15892000	14991000	14804000	15794000	15170000	C03064	ko00053,ko01100
mws0275	133.01	71.01	134.022	C4H6O5	[M-H]-	L-Malic acid*	Organic acids	Organic acids	97-67-6	1	1990900	1980200	1682200	2067800	2492200	3652700	2559900	2058200	2501900	1583100	2020400	1734500	5462700	4359100	4845300	2726000	1677100	2037400	3987000	3970700	4461000	4270600	4489400	3911900	4145700	4056800	C00149	ko00020,ko00620,ko00630,ko00710,ko01100,ko01110,ko01200
MWSmce701	135.08	79.05	134.073	C9H10O	[M+H]+	4-Ethylbenzaldehyde	Others	Others	4748-78-1	3	41525	35385	34535	31067	28839	40211	27649	47911	36674	39953	37461	29396	36149	32457	56162	37408	30483	32836	21109	15892	19589	17188	20292	22765	21113	20540	--	--
Zmdp000972	136.04	91.05	135.035	C4H9NO2S	[M+H]+	S-Methyl-L-cysteine	Amino acids and derivatives	Amino acids and derivatives	1187-84-4	2	1065400	977020	1037700	1556900	1787800	1097300	1325700	1363100	1312300	1270600	1009700	1271700	1740900	1417300	1326700	1471700	906890	1137100	1191000	1156300	1265500	1379300	1235300	1193600	1337800	1203700	C22040	ko02010
pme0040	136.06	119	135.054	C5H5N5	[M+H]+	Adenine	Nucleotides and derivatives	Nucleotides and derivatives	73-24-5	1	10487000	13432000	10601000	20505000	20267000	23678000	17696000	13927000	14632000	43319000	45948000	59831000	83340000	90321000	74019000	41584000	31360000	44126000	38604000	39858000	40656000	42223000	40105000	40459000	35430000	41016000	C00147	ko00230,ko00908,ko01100
pmb0374	136.06	118.9	135.054	C5H5N5	[M+H]+	2-Aminopurine	Nucleotides and derivatives	Nucleotides and derivatives	452-06-2	1	2500200	2757900	2722700	2786100	2761300	2705000	2657700	2863300	3005100	1919000	2526800	2366200	1020400	882290	1263700	2070600	1878500	1750200	1773600	1656600	1741200	1644800	1807500	1879300	1873600	1791600	--	--
MWSmce556	136.08	91.06	135.068	C8H9NO	[M+H]+	2'-Aminoacetophenone	Others	Others	551-93-9	3	17639	7966.6	16675	7714.7	15553	8584.1	15324	18449	14045	9085.9	7979.4	17401	12581	10969	9062.4	8580.2	5930.5	12082	14148	16303	14297	10985	7702.6	12938	9730.8	13203	--	--
Lmgp000659	136.08	91.05	135.068	C8H9NO	[M+H]+	2-Phenylacetamide*	Alkaloids	Alkaloids	103-81-1	3	1389700	1288500	1368500	1968900	2246200	1398200	1679200	1900100	1712000	1821200	1309700	1831700	2078300	1863400	1750400	1835000	1302000	1556900	1663900	1591000	1578600	1997300	1537300	1602800	1681600	1721700	C02505	ko00360,ko01100
HJKP000649	136.07	91.05	135.068	C8H9NO	[M+H]+	N-benzylformamide*	Alkaloids	Alkaloids	6343-54-0	2	1230200	1052800	1070600	1620700	2036100	1328400	1525000	1543200	1562700	1629200	1222100	1482800	2031400	1539900	1608800	1699300	1138700	1341900	1407800	1455500	1434000	1676300	1379500	1333900	1440700	1558200	C15561	--
mws0889	135.03	75.01	136.037	C4H8O5	[M-H]-	D-Threonic Acid	Others	Saccharides and Alcohols	3909-12-4	1	2157600	2830800	2547300	3231200	4069800	3223800	2911300	2824800	2568500	3216500	3795900	3545900	3098400	3672500	3603700	3246400	3541400	2740800	2557800	2564700	2412800	2580000	2746400	2891500	2594800	2891800	C21649	--
pme0033	137.05	119	136.039	C5H4N4O	[M+H]+	Hypoxanthine	Nucleotides and derivatives	Nucleotides and derivatives	68-94-0	3	68146	69432	71722	162650	148040	152700	107840	73744	83326	222640	223460	324580	548650	598850	385000	178300	159260	210530	302120	329250	320530	354970	328030	314170	355710	330300	C00262	ko00230,ko01100
Zmyn002919	135.04	91.05	136.052	C8H8O2	[M-H]-	2-Methylbenzoic acid	Phenolic acids	Phenolic acids	118-90-1	3	7063.2	7137.1	7757.4	7352.5	6024	6741.6	6228.7	4862.6	8226.8	17592	12538	12682	6278.3	9147.3	8238.2	7894.8	9616.9	10870	5143.7	4657.8	6767.7	4888.3	6142.3	8775.6	5437.7	4892.6	C07215	ko01100
MWSmce466	135.05	92.03	136.052	C8H8O2	[M-H]-	4'-Hydroxyacetophenone	Phenolic acids	Phenolic acids	99-93-4	3	24009	45391	33690	128820	120740	90476	55194	60681	53836	33781	38264	40660	37382	24804	18138	36294	31258	43043	53274	61331	43390	50800	57308	62834	58798	59914	C10700	ko01100
pme2268	138.06	94.07	137.048	C7H7NO2	[M+H]+	Trigonelline	Alkaloids	Pyridine alkaloids	535-83-1	1	20914000	20645000	22930000	26367000	25156000	28098000	22941000	20864000	25799000	20355000	22696000	19632000	20273000	21262000	17971000	18132000	24726000	23630000	15895000	17669000	17414000	18356000	17468000	16512000	16347000	16646000	C01004	ko00760
mws1336	138.06	120	137.048	C7H7NO2	[M+H]+	4-Aminobenzoic acid	Phenolic acids	Phenolic acids	150-13-0	2	149340	102060	128160	101510	114520	81916	135040	3148.1	119510	156890	206820	198680	175610	140610	88184	192570	139020	193700	82152	82335	93557	83034	95213	2801.9	105920	107830	C00568	ko00790,ko01100
mws1078	138.06	92.1	137.048	C7H7NO2	[M+H]+	Anthranilic Acid	Phenolic acids	Phenolic acids	118-92-3	3	1424600	1515100	1753200	637450	667920	724480	1506300	1637800	1483900	898950	1013500	897620	507840	439000	364950	1194400	1292600	1178000	695590	742820	696070	714020	802270	752680	778420	721590	C00108	ko00380,ko00400,ko00998,ko01058,ko01100,ko01110,ko01230
mws0146	138.06	78	137.048	C7H7NO2	[M+H]+	Nicotinic Acid Methyl Ester(Methyl Nicotinate)	Alkaloids	Pyridine alkaloids	93-60-7	3	94690	127300	74946	234350	241240	208230	159490	165460	130200	109470	103400	161910	165500	209360	182450	118960	108810	73798	206420	214370	216500	248150	265760	257360	249500	241150	--	--
pme1002	138.09	103	137.084	C8H11NO	[M+H]+	L-Tyramine	Amino acids and derivatives	Amino acids and derivatives	51-67-2	1	4607900	6733500	5882500	9777600	9849700	8376600	4609600	3466700	5278400	2539400	2387500	4394600	5627400	4357700	3620700	2992000	2391700	2182000	5790400	5975500	6414100	6651500	6051400	6193100	6141400	6454500	C00483	ko00350,ko00950,ko01100,ko01110
pma0948	138.09	121.1	137.084	C8H11NO	[M+H]+	Phenylethanolamine	Alkaloids	Alkaloids	7568-93-6	3	1191900	1816500	1703100	2904400	2733700	2442700	1232000	1009300	1466400	717690	788250	1340200	1971800	1411700	1122100	898810	715330	696810	1745800	1702000	1802900	1888200	1760900	1817400	1741200	1734500	C02735	--
Hmgn001653	137.02	93.04	138.032	C7H6O3	[M-H]-	Protocatechualdehyde*	Phenolic acids	Phenolic acids	139-85-5	2	1505500	2693500	2224100	2425900	3687300	2895500	1922700	2725500	2071000	1408000	1629400	1729800	3598700	4042700	1879100	1750300	1301400	1853400	2137300	1899700	1966300	1882100	2005000	2006900	2168100	1876700	C16700	ko00950
MWSCX016	139.04	77.04	138.032	C7H6O3	[M+H]+	p-hydroxybenzoic acid	Phenolic acids	Phenolic acids	99-96-7	3	137360	199080	204030	202020	304760	238870	148500	210970	167720	111250	113140	124380	286850	290920	133040	98904	85385	119890	153830	162290	156580	157000	178150	162210	152570	176090	C00156	ko00130,ko00790,ko01100,ko01110
Lmgn001670	137.03	108.02	138.032	C7H6O3	[M-H]-	Salicylic acid	Phenolic acids	Phenolic acids	69-72-7	1	106980	129810	118150	120550	133010	134290	145450	177230	124820	108770	103390	114980	139960	130130	152620	89377	94556	107390	102750	79036	109150	99964	99041	130020	104290	123220	C00805	ko00360,ko01100,ko01110,ko04075
Lmbn001981	137.02	93.03	138.032	C7H6O3	[M-H]-	2,5-Dihydroxybenzaldehyde*	Phenolic acids	Phenolic acids	1194-98-5	2	1086100	2088800	1706400	1850000	2892700	2128500	1471600	1759200	1690800	1166200	1276600	1274300	3091800	3076000	1388700	1422100	1031500	1475000	1419600	1516900	1285100	1526300	1556000	1391900	1334400	1517300	C05585	ko00350,ko01100
mws0336	137.04	93.05	138.043	C6H6N2O2	[M-H]-	Urocanic acid	Organic acids	Organic acids	104-98-3	3	157380	188180	127560	207220	172180	108290	133290	132790	122180	99487	183660	151500	170860	173770	139990	148960	164980	132460	160550	186040	159490	111440	122060	170610	181060	133420	C00785	ko00340,ko01100
MWS1850	139.08	56.96	138.068	C8H10O2	[M+H]+	2-Phenoxyethanol	Phenolic acids	Phenolic acids	122-99-6	3	41213	30440	34115	10965	13896	8495	44441	45696	18375	39913	38265	41352	47770	49327	41854	76016	39427	57238	44292	62847	35652	51370	43551	49795	43131	33140	--	--
mws2368	137.06	119.05	138.068	C8H10O2	[M-H]-	Tyrosol	Phenolic acids	Phenolic acids	501-94-0	2	14578	16388	14174	10954	8654	9570.5	14593	24496	8418.4	6630.5	13141	15874	16781	16328	12737	8645.3	5930.3	13902	7274.6	10466	15045	14959	13192	9344.7	7362.6	15004	C06044	ko00350,ko01100
pme1137	140.03	94	139.027	C6H5NO3	[M+H]+	6-Hydroxynicotinic acid	Alkaloids	Pyridine alkaloids	5006-66-6	3	90960	100840	135440	136870	161230	136410	124820	137110	130620	131850	107360	148290	97635	95170	107070	107220	86758	137030	129980	149360	101650	128530	116590	114790	118610	124260	C01020	ko00760,ko01100
pme2828	140	99	139.027	C6H5NO3	[M+H]+	4-Nitrophenol	Phenolic acids	Phenolic acids	100-02-7	3	22613000	23821000	21271000	21135000	22933000	21052000	24768000	23804000	19903000	21096000	9507400	19230000	19976000	16072000	18191000	14849000	9770200	16782000	23188000	26812000	25648000	19810000	21180000	16069000	16473000	20561000	C00870	--
MWSmce585	104.07	59.01	139.04	C4H9NO2	[M-Cl]+	Methyl 3-aminopropanoate	Amino acids and derivatives	Amino acids and derivatives	3196-73-4	2	4285400	4363100	4995100	3480700	3612900	3411800	5044200	4902000	4852000	4575400	5295300	5966300	5573300	6185400	4667700	4959400	5169500	4926900	3387800	3843100	4073100	4256300	4244900	3960600	3744000	4103400	--	--
mws0704	140.01	78.96	141.019	C2H8NO4P	[M-H]-	O-Phosphorylethanolamine	Alkaloids	Alkaloids	1071-23-4	3	32163	25812	30910	306.81	585.95	1005.4	53848	43869	53428	46965	41760	28216	1162	2916.4	5532.2	139830	102840	119070	38489	31237	26618	37668	36933	34711	36423	34435	C00346	ko00564,ko00600,ko01100
pma2987	142.1	124.09	141.09	C6H11N3O	[M+H]+	Histidinol	Alkaloids	Alkaloids	501-28-0	3	3102800	2800800	2875100	3409300	3354600	2869700	3090300	3048200	3395000	3290700	3199200	2647400	1055100	2643800	3335900	3631500	4277200	3379200	4700300	4993700	4755100	4969000	5149100	5296200	5085300	5259300	C00860	ko00340,ko01100,ko01110,ko01230
pme3207	141.02	59	142.027	C6H6O4	[M-H]-	Muconic acid	Organic acids	Organic acids	1119-72-8	1	1488300	1764000	1776300	1553400	1756000	1652300	1409400	1641300	1471000	1812400	1931200	2058300	2729100	2082300	1429500	1348100	1352200	1340000	2626000	2344400	2143700	2634000	2288000	2511400	2555200	1983400	C02480	ko01100
pmb0764	144.05	113.2	143.04	C6H9NOS	[M+H]+	4-Methyl-5-thiazoleethanol	Others	Others	137-00-8	3	35744	62509	49044	75254	100890	79760	59160	78661	26403	70259	28838	86054	88528	33968	36449	27877	23787	42625	67626	68566	69694	70469	91720	79322	76067	72466	C04294	ko00730,ko01100
Rfmb320	144.1	84.08	143.095	C7H13NO2	[M+H]+	1-Methylpiperidine-2-carboxylic acid	Organic acids	Organic acids	7730-87-2	3	406660	361390	438500	277240	226970	242720	306790	284720	329010	246460	333790	268280	306750	304810	583260	285690	308720	309150	264560	249920	287440	257920	262540	318240	264820	298020	--	--
Hmsp000364	144.1	98.09	143.095	C7H13NO2	[M+H]+	L-Cyclopentylglycine	Amino acids and derivatives	Amino acids and derivatives	2521-84-8	3	22882	18312	46974	32656	35320	47421	16357	39944	56795	18555	34290	9911.5	24422	54002	25689	15141	32484	32421	28965	30137	27777	33106	24556	39468	57109	44784	--	--
MWS1875	143.05	115.05	144.058	C10H8O	[M-H]-	2-Naphthol	Phenolic acids	Phenolic acids	135-19-3	3	15427	13179	15040	12732	8728	10844	14863	14037	14268	22037	20315	17088	17168	15444	27167	34846	30003	28701	13313	10478	14298	13382	13821	13220	15252	12554	C11713	--
MWS2066	143.05	115.06	144.058	C10H8O	[M-H]-	1-Naphthol	Phenolic acids	Phenolic acids	90-15-3	3	13037	9818.1	13613	8427.8	7706.4	9642.4	9970.3	13004	11486	21940	16591	13502	15338	13242	25284	31207	22834	23708	12140	11329	11811	10983	10428	8349.7	9543.3	9399.1	C11714	--
mws0851	143.11	143.11	144.115	C8H16O2	[M-H]-	Valproic Acid	Organic acids	Organic acids	99-66-1	1	1967700	1963800	2142300	1205400	1188300	1224300	1834700	1849700	1692200	1952700	1778000	1613000	1489000	1529600	1585700	2323200	2061000	1985700	1578000	1566200	1589500	1698900	1627300	1595200	1730900	1547700	--	--
mws0103	146.06	91	145.053	C9H7NO	[M+H]+	Indole-3-carboxaldehyde	Alkaloids	Plumerane	487-89-8	3	145370	197840	153030	147460	172750	192200	218110	259830	195710	175610	138540	159380	165910	166010	152390	155550	120490	138560	272610	275100	260590	258740	265630	254900	254350	258650	C08493	--
Lmqp000427	146.08	82.07	145.074	C6H11NO3	[M+H]+	N-Methyl-Trans-4-Hydroxy-L-Proline	Amino acids and derivatives	Amino acids and derivatives	4252-82-8	3	15929	29852	14921	20372	20219	24312	20532	22571	24457	30335	29758	19490	18160	22800	20889	30200	24958	31430	25339	24449	33712	18992	27066	34969	35216	30914	--	--
pme0295	146.08	86	145.074	C6H11NO3	[M+H]+	4-Acetamidobutyric acid	Organic acids	Organic acids	3025-96-5	3	66538	62176	90329	37362	55966	38467	79225	81818	80165	65500	79016	94473	31810	49944	74062	94955	115570	118970	198790	180260	190040	186000	205330	209670	204290	228690	C02946	ko00330,ko01100
mws0567	146.09	87	145.085	C5H11N3O2	[M+H]+	4-Guanidinobutyric acid	Organic acids	Organic acids	463-00-3	3	186050	204160	194590	128690	120170	156580	169730	205770	224350	204160	212640	285210	152700	256850	565000	223140	223220	215220	231010	198660	221950	202040	239440	220230	235990	218850	C01035	ko00330,ko01100
mws0017	146.17	72.2	145.158	C7H19N3	[M+H]+	Spermidine	Alkaloids	Alkaloids	124-20-9	3	16067	15648	21828	16363	12936	8983.2	10536	10385	14036	10655	9593.3	7662.9	6968.2	4540	6321.7	4652.3	4809.5	6396.9	5899.4	10480	9534.6	4732.9	5527.7	7540.6	6897.3	5724.9	C00315	ko00330,ko00410,ko00480,ko00940,ko01100,ko02010
Lmgn000224	145.01	57.03	146.022	C5H6O5	[M-H]-	2-Methyl-3-oxosuccinic acid	Organic acids	Organic acids	-	3	17611	16704	16961	20554	6723.8	17484	30637	31199	26025	11803	8316.8	12188	34917	5778.5	8425	12301	7900.8	13596	5104.5	11118	6409.5	14575	6819.5	5074.5	14595	9094.8	C06030	ko00660
pme2380	145.01	101	146.022	C5H6O5	[M-H]-	α-Ketoglutaric acid	Organic acids	Organic acids	328-50-7	3	110620	139220	136050	52539	51392	100260	165330	227410	245450	51092	70958	48994	139440	72888	78195	64231	45054	60260	101880	102490	108190	102340	86180	68390	99035	72558	C00026	ko00020,ko00040,ko00053,ko00220,ko00250,ko00300,ko00310,ko00340,ko00430,ko00630,ko00650,ko00660,ko01100,ko01110,ko01200,ko01210,ko01230
mws1012	147.04	103	146.037	C9H6O2	[M+H]+	Coumarin	Lignans and Coumarins	Coumarins	91-64-5	2	24048	17748	19788	7134.6	7914.1	11160	14134	26839	15941	19992	16633	13997	13497	11836	17119	21604	20673	21137	12189	16832	14824	11492	21078	13294	14531	18177	C05851	ko00940,ko01110
mws0924	145.05	101	146.058	C6H10O4	[M-H]-	2-Methylglutaric acid*	Organic acids	Organic acids	617-62-9	2	396410	493030	504050	388090	385860	422300	517960	541800	538250	469710	374580	559260	332290	248850	280610	536550	462910	511570	590010	612650	584430	614430	587050	581220	546360	623160	--	--
mws0208	145.05	101	146.058	C6H10O4	[M-H]-	Adipic Acid*	Organic acids	Organic acids	124-04-9	2	451760	540600	497830	410530	406050	407990	555640	596300	561580	576810	483470	603250	379390	354680	288750	558300	527100	491340	661750	665780	722460	647090	687800	667520	657200	690990	C06104	ko01100
MWS5136	145.05	101.06	146.058	C6H10O4	[M-H]-	Mono-Methyl Glutarate	Organic acids	Organic acids	1501-27-5	3	21196	15031	38928	22345	16636	3933.8	20067	16277	14751	19283	26139	18702	13116	18867	11380	17013	22183	28015	17384	17494	19094	14205	17672	12579	18506	14446	--	--
Wmzn000227	145.06	109.04	146.058	C6H10O4	[M-H]-	2,2-Dimethylsuccinic acid	Organic acids	Organic acids	597-43-3	1	12855	27134	24647	152840	202360	46077	32686	23024	30766	62480	51450	96003	57756	35098	45836	72426	33262	55335	45373	55274	46596	58159	41648	60548	52892	37580	--	--
Lmbn001676	145.05	101.06	146.058	C6H10O4	[M-H]-	3-Hydroxy-3-Methyl-2-Oxopentanoic Acid	Organic acids	Organic acids	-	3	17036	22068	23124	4545.8	6238.6	17076	16302	20163	17598	19959	21793	26147	9983.4	18384	4138.5	18699	15055	18388	12697	14208	12555	19604	9156.4	7316.8	21943	7564.2	C14463	ko00290,ko01110,ko01210
Lmbn001609	145.05	83.05	146.058	C6H10O4	[M-H]-	2-Acetyl-2-Hydroxybutanoic Acid	Organic acids	Organic acids	-	3	34212	61384	57622	43623	48282	51669	58611	67063	56038	52555	41765	69737	39352	42685	35181	57768	63019	47944	72020	68288	74262	76605	77519	80445	75557	83333	C06006	ko00290,ko01100,ko01110,ko01210,ko01230
pme0193	147.08	84	146.069	C5H10N2O3	[M+H]+	L-Glutamine	Amino acids and derivatives	Amino acids and derivatives	56-85-9	1	4899000	4839400	5549100	10107000	11788000	3972900	6025400	6487900	6951300	8541600	5375700	5042100	11451000	6249900	11455000	8990100	3504000	5340600	6182800	6519200	7065000	5679900	6391900	5569200	4736900	5422400	C00064	ko00220,ko00230,ko00240,ko00250,ko00630,ko00750,ko00910,ko00970,ko01100,ko01230,ko02010
pme0026	147.11	84	146.106	C6H14N2O2	[M+H]+	L-Lysine	Amino acids and derivatives	Amino acids and derivatives	56-87-1	1	5750300	5439400	6383600	11848000	12987000	5114600	6908300	7740200	8219300	9714700	7047800	6298200	8228000	8084000	13293000	10295000	4228900	6228300	6981900	7215100	7507100	7120700	7522300	6691700	5275100	6854300	C00047	ko00300,ko00310,ko00780,ko00960,ko00970,ko01100,ko01110,ko01210,ko01230,ko02010
Zmzn000113	146.05	102.06	147.053	C5H9NO4	[M-H]-	L-threo-3-Methylaspartate	Amino acids and derivatives	Amino acids and derivatives	6061-13-8	1	2008300	2023800	1909500	2324900	2457700	2082500	2107100	2231600	2409100	2138200	2476500	2325500	2303800	1842000	1993100	2653500	3145600	2890300	1636500	1584900	1403400	1632900	1422900	1532500	1663500	1706600	C03618	ko00630,ko00660,ko01100,ko01200
pme0014	148.06	84	147.053	C5H9NO4	[M+H]+	L-Glutamic acid	Amino acids and derivatives	Amino acids and derivatives	56-86-0	1	102800000	104720000	93933000	100410000	98842000	90108000	112890000	113940000	103180000	103350000	102630000	106840000	84970000	74593000	66621000	114790000	117020000	107090000	71173000	61192000	59835000	66428000	72605000	74593000	74666000	74832000	C00025	ko00220,ko00250,ko00330,ko00332,ko00340,ko00430,ko00480,ko00630,ko00650,ko00660,ko00860,ko00910,ko00970,ko01100,ko01110,ko01200,ko01210,ko01230,ko02010
mws1050	148.06	88	147.053	C5H9NO4	[M+H]+	O-Acetylserine	Amino acids and derivatives	Amino acids and derivatives	5147-00-2	3	384870	520310	541810	348290	380980	318190	556200	535420	517660	432970	347180	451780	226820	453620	439890	618560	497520	529650	411780	317040	359840	373050	374470	388140	391880	404920	C00979	ko00270,ko00908,ko00920,ko01100,ko01110,ko01200,ko01230,ko04122
MWSmce572	148.08	103.06	147.068	C9H9NO	[M+H]+	Cinnamamide	Others	Others	22031-64-7	3	16208	73251	54903	18005	33625	30053	65634	117160	23829	56268	9946.6	66851	8134.3	7208.6	3301.2	7399.2	4952.3	35377	41615	41230	37225	34739	39099	27710	35520	34937	--	--
MWSmce608	148.1	74.02	147.09	C6H13NO3	[M+H]+	4-Hydoxy-L-Isoleucine	Amino acids and derivatives	Amino acids and derivatives	781658-23-9	2	144070	134900	133250	158630	137430	112270	139760	220960	175410	180460	282890	228590	156880	152810	163120	278500	140840	147940	156660	150150	129820	145600	97937	100980	224030	96405	--	--
MWSmce190	148.09	74.02	147.09	C6H13NO3	[M+H]+	(2S,3R,4S)-4-Hydroxyisoleucine	Amino acids and derivatives	Amino acids and derivatives	55399-93-4	2	223630	197780	138680	122640	181250	192780	239490	216960	183140	207580	244690	277970	190390	173840	161510	171600	207200	243080	149840	105760	168480	136510	228470	100900	122170	159320	--	--
pmp001285	149.02	65.04	148.016	C8H4O3	[M+H]+	Phthalic anhydride	Phenolic acids	Phenolic acids	85-44-9	1	1294000	1446500	1375900	1428700	1508000	1445700	1355900	1378200	1180700	1342600	1403000	1395300	1320300	1293000	1562300	1136700	1126200	1233600	908060	921910	889650	862270	930920	951760	918630	970280	--	--
Lmbn000216	147.03	57.03	148.037	C5H8O5	[M-H]-	3-Methylmalic acid*	Organic acids	Organic acids	152204-30-3	1	313170	300560	323940	369850	325580	406600	418500	437180	385910	331330	314510	395730	474760	500860	400440	420410	371480	313620	396980	479960	494250	475360	465970	450540	470480	388260	C06032	ko00290,ko00660,ko01100,ko01210,ko01230
Zmyn000230	147.03	57.03	148.037	C5H8O5	[M-H]-	2-Dehydro-3-deoxy-L-arabinonate	Others	Saccharides and Alcohols	-	1	330980	280220	266920	298060	201070	325910	311240	367720	311430	247470	245900	305380	421410	372270	346920	341520	285540	260290	442330	362030	443290	383710	356860	311800	402390	373010	C00684	ko00053,ko01100
ML10171848	147.03	85.03	148.037	C5H8O5	[M-H]-	D-Arabinono-1,4-lactone	Others	Saccharides and Alcohols	2782-09-4	1	114010	104370	104060	96524	136580	159720	127700	123630	151270	109130	96327	139660	172940	156470	132040	130470	124250	125370	137550	144440	154070	134470	163480	209590	157600	196890	C00652	--
pmb2826	147.03	87.1	148.037	C5H8O5	[M-H]-	L-Citramalic acid	Organic acids	Organic acids	6236-09-5	1	767430	730590	698020	679970	566560	874400	811890	930270	775100	712840	651130	957230	1073700	1068300	894170	983890	807610	765460	794110	786440	882440	879770	695820	791070	873220	840200	C02614	ko00660,ko01100
MWS3036	147.03	85.03	148.037	C5H8O5	[M-H]-	3-Hydroxyglutaric acid	Organic acids	Organic acids	638-18-6	3	66197	75072	73823	58133	40859	83865	72039	97234	83919	73214	24425	66019	101670	114480	93383	129160	87986	72172	68672	97259	92422	95013	115440	160900	95395	90570	--	--
Zmyn000247	147.03	57.03	148.037	C5H8O5	[M-H]-	2-Hydroxyglutaric Acid*	Organic acids	Organic acids	13095-48-2	1	337090	325030	246490	346220	357210	506630	414380	460700	406560	341400	293380	469580	532460	539560	490610	472750	406100	348750	466950	444490	504170	461160	441860	476140	511710	375820	C03196	ko00310,ko01100
MWS20194	149.06	103.06	148.052	C9H8O2	[M+H]+	Cinnamic acid	Phenolic acids	Phenolic acids	140-10-3	3	82052	97176	100340	56247	51702	58405	133730	103290	93968	83276	77041	56238	47455	50918	51426	48435	98867	73005	292890	344670	303240	312850	352640	328920	366480	372730	C00423	ko00130,ko00360,ko00940,ko00998,ko01100,ko01110
MWSmce698	149.1	65.04	148.089	C10H12O	[M+H]+	2',4'-Dimethylacetophenone	Others	Others	89-74-7	3	57713	62893	63081	50535	65920	69101	74330	73392	89357	50159	55177	65432	54140	66489	65901	30698	37219	30980	34215	29930	20233	25423	34258	14725	26672	26279	--	--
Lmgp000796	150.06	61.01	149.048	C8H7NO2	[M+H]+	4-Hydroxymandelonitrile	Alkaloids	Phenolamine	13093-65-7	1	2288800	2287000	2258000	1226500	1250200	1390300	2728300	3120600	3407100	1789500	2132600	2103500	955210	876140	1003200	3008800	3125800	2871100	1459000	1480700	1537000	1687400	1509700	1537200	1527000	1566500	C00650	--
pme1210	150.06	61	149.051	C5H11NO2S	[M+H]+	L-Methionine	Amino acids and derivatives	Amino acids and derivatives	63-68-3	1	2368400	2411400	2274300	1299700	1198500	1503600	2874200	3497300	3285600	1647000	2193600	2138400	939970	861460	957670	3118500	3024400	3188700	1477600	1568300	1546400	1796300	1509000	1549600	1513500	1535100	C00073	ko00270,ko00966,ko00970,ko01100,ko01110,ko01210,ko01230
mws0847	150.08	133	149.07	C6H7N5	[M+H]+	1-Methyladenine	Nucleotides and derivatives	Nucleotides and derivatives	5142-22-3	2	65954	105590	80836	38987	42437	46645	116280	111060	100070	66122	65000	72742	26179	30946	21817	69340	71901	79070	50631	51541	51600	56158	55415	71315	61999	65272	C02216	--
mws0262	149.01	87	150.016	C4H6O6	[M-H]-	L-Tartaric acid	Organic acids	Organic acids	87-69-4	3	1007900	1076900	1236900	1305800	1515900	1383600	1111200	1056000	1096100	1426800	1419800	1313500	1869800	1805700	2239500	1674200	1512600	1411500	1952300	1954200	2226600	1848600	1981000	2111900	1922500	2346400	C00898	ko00630,ko01100
MWSmce676	149.05	59.01	150.053	C5H10O5	[M-H]-	D-Arabinose	Others	Saccharides and Alcohols	28697-53-2	2	594090	762680	703820	761060	909600	816650	686850	653070	533480	801290	787090	885350	886820	910430	1191300	878040	883470	697840	872040	978390	950970	954430	865730	891290	872080	957700	C00216	--
MWSmce682	149.05	59.01	150.053	C5H10O5	[M-H]-	DL-Xylose	Others	Saccharides and Alcohols	25990-60-7	2	460510	577060	549880	650520	699690	728220	569600	574770	502200	638270	694950	808830	832260	794800	1118600	796680	791850	691090	924520	763030	884860	880070	816420	746670	766020	935830	--	--
Zmgn000173	149.05	75.01	150.053	C5H10O5	[M-H]-	D-Ribose	Others	Saccharides and Alcohols	50-69-1	1	173090	238070	190650	263010	249990	288150	217060	234740	238180	294320	236170	260800	351960	424860	432070	348930	209010	276400	240100	228660	250930	230310	250620	250630	256020	260790	C00121	ko00030,ko01100,ko02010
Lmxp001668	151.08	91.05	150.068	C9H10O2	[M+H]+	2-Methoxy-4-ethenylphenol	Phenolic acids	Phenolic acids	7786-61-0	1	24135	6039.1	19325	320420	387570	445890	10918	32985	19388	711310	578480	993090	2090100	2162400	1894000	852560	551600	300550	832590	695910	648200	674690	870940	819600	813490	758830	C17883	--
pmf0420	149.06	74.9	150.068	C9H10O2	[M-H]-	Benzyl acetate	Organic acids	Organic acids	140-11-4	3	462370	446300	457610	409280	411930	463110	438740	469150	435540	477560	488300	424540	613970	530970	549610	567810	476320	454420	213610	263890	245740	257270	291850	289910	284240	329620	C15513	--
Lmxn006423	150	122.01	151.009	C7H5NOS	[M-H]-	2(3H)-Benzothiazolone	Alkaloids	Alkaloids	934-34-9	1	49706	28650	45089	27151	21598	31502	30732	33856	47468	53213	50954	39763	49211	50660	64999	68595	77415	64271	45242	49888	46517	51448	45251	53300	53930	57339	--	--
pme0183	152.06	135	151.049	C5H5N5O	[M+H]+	Isoguanine	Nucleotides and derivatives	Nucleotides and derivatives	3373-53-3	1	196390	327950	267480	687790	648760	537080	272560	398220	239400	206880	206040	345950	471790	382600	280260	208550	180330	201280	344970	334330	368200	362650	376590	351890	344780	375290	--	--
pme1109	152.06	135	151.049	C5H5N5O	[M+H]+	Guanine	Nucleotides and derivatives	Nucleotides and derivatives	73-40-5	1	1118200	1966000	2050700	5795600	4838500	4345300	1667600	2369900	1387300	1440000	950940	2213000	4118300	3199700	2063400	1309100	842390	1295600	2788700	2629000	2786700	2963500	2708500	2958100	2879300	2916200	C00242	ko00230,ko01100
mws4177	152.07	120.05	151.063	C8H9NO2	[M+H]+	Methyl Anthranilate	Phenolic acids	Phenolic acids	134-20-3	3	7770.6	7052.1	8054.5	4444.9	4187	6446	4512	8923.7	8276.2	10150	8215.7	10884	4955.2	3473.2	3298.9	6172.2	8616.2	7442.2	7775.8	4954.7	8046.8	4711	9244.8	7529.4	6371.5	8308	C20634	--
pme0256	151.03	151	152.033	C5H4N4O2	[M-H]-	Xanthine	Nucleotides and derivatives	Nucleotides and derivatives	69-89-6	1	95400	83014	88822	106120	134800	87638	88052	60508	71751	125520	138120	68991	127920	144030	212980	99574	121430	130910	125270	142290	175890	166790	163800	181130	136930	189660	C00385	ko00230,ko00232,ko01100,ko01110
MWS2984	153.05	136.03	152.045	C4H4N6O	[M+H]+	8-Azaguanine	Nucleotides and derivatives	Nucleotides and derivatives	134-58-7	3	131480	269560	255610	527380	507920	405320	202220	226050	182070	178370	138180	241870	383110	309120	185710	131470	115300	142260	305990	360760	318670	384730	293290	311960	319600	331270	--	--
mws0182	151.04	106.9	152.047	C8H8O3	[M-H]-	p-Hydroxyphenyl acetic acid	Phenolic acids	Phenolic acids	156-38-7	3	29928	52853	56369	29654	45305	31596	49973	63854	40486	35607	53869	38432	52489	55053	25097	41307	27512	31335	34003	36847	39976	37848	37768	48858	50282	15180	C00642	ko00350,ko00360,ko01100
MWSmce040	153.05	65.04	152.047	C8H8O3	[M+H]+	Isovanillin	Phenolic acids	Phenolic acids	621-59-0	3	312130	398000	329740	234810	248400	239050	394910	431390	343820	356020	297510	369270	282940	238020	309560	360740	291930	310240	633550	702700	637240	783860	764130	807800	713340	690130	--	--
Zmgn004894	151.04	136.02	152.047	C8H8O3	[M-H]-	Methyl 4-hydroxybenzoate*	Organic acids	Organic acids	99-76-3	3	107890	147950	113490	70039	88815	83434	133440	127900	118590	125450	82102	116320	117780	101040	115720	134350	119710	103570	219860	257390	256830	302510	272370	294790	258290	263610	--	--
MWS3149	151.04	107.05	152.047	C8H8O3	[M-H]-	3-Methoxybenzoic acid	Phenolic acids	Phenolic acids	586-38-9	3	59336	58588	70494	106780	95571	130430	49659	56276	72816	64155	72971	62686	91883	72751	67249	54442	66797	78419	47591	54118	62120	56206	60169	54998	58271	48241	--	--
mws0458	151.04	136	152.047	C8H8O3	[M-H]-	Vanillin*	Phenolic acids	Phenolic acids	121-33-5	2	925380	1194400	954270	718830	714960	698900	1068900	1181200	990530	1016500	887230	1019100	980820	867470	953000	1067500	952280	942310	2028100	2243100	2048200	2313400	2406000	2322300	2208000	1909700	C00755	ko00998,ko01100,ko01110
MWS2058	151.04	107.05	152.047	C8H8O3	[M-H]-	3-Methylsalicylic Acid	Phenolic acids	Phenolic acids	83-40-9	3	4363.1	7693.8	6828.8	3879.6	5377	4897.4	6261	5830.2	4553.8	5429.8	6025.2	4193.7	2232.6	3159.1	2049.2	3208	4581.6	4143.2	5267.5	6160.5	9362.1	4049.7	4909.8	4684.3	4688	6378.2	C14088	--
MWS0687	153.07	108.04	152.059	C7H8N2O2	[M+H]+	1-Methyl-6-Oxo-1,6-Dihydropyridine-3-Carboxamide	Alkaloids	Pyridine alkaloids	701-44-0	2	17184	21955	21128	21327	26430	22524	26787	16485	10627	41449	35760	39412	39904	47587	52318	30556	23561	30376	25820	23815	24487	25369	23220	21952	19478	29972	--	--
pme0513	151.06	59	152.068	C5H12O5	[M-H]-	Xylitol	Others	Saccharides and Alcohols	87-99-0	1	38948	44188	37036	43181	20908	43472	53235	45471	47719	38040	50186	59728	43180	47642	34877	53084	42908	42780	21145	25363	15708	24018	34641	18786	23015	33652	C00379	ko00040,ko01100,ko02010
mws0437	151.06	71	152.068	C5H12O5	[M-H]-	D-Arabitol*	Others	Saccharides and Alcohols	488-82-4	1	87552	130250	166150	124280	137480	120710	125340	109380	89178	114760	147120	145850	143430	175680	201830	106210	170840	133930	127230	105020	111810	96254	115220	100550	113270	133700	C01904	ko00040,ko01100
mws0213	151.06	71	152.068	C5H12O5	[M-H]-	Ribitol*	Others	Saccharides and Alcohols	488-81-3	1	141010	149040	154000	132320	121890	139340	121670	122730	135220	150430	149220	181180	147920	124740	190760	150720	166400	122740	77544	125240	99842	93610	98488	144440	126270	116780	C00474	ko00040,ko00740,ko01100
MWS1962	153.13	83.05	152.12	C10H16O	[M+H]+	cis-Citral	Organic acids	Organic acids	5392-40-5	3	10136	11232	14244	5642.2	5794.1	5937.1	5999.3	8023.7	11299	9621.5	14031	10044	8565.4	10292	9220.2	7734.2	12183	10612	15282	17121	14318	13815	18941	20634	16407	23588	C09847	ko01110
mws0444	152.04	108	153.043	C7H7NO3	[M-H]-	3-Aminosalicylic acid	Phenolic acids	Phenolic acids	570-23-0	2	17964	25416	18791	30825	18409	29668	19842	12755	19156	17606	23559	25728	54495	37986	32622	13246	35269	19771	12147	18678	20759	30823	37550	26916	26110	32290	--	--
Hmlp000935	154.09	137.06	153.078	C8H11NO2	[M+H]+	Vanillylamine	Alkaloids	Phenolamine	1196-92-5	2	226600	177390	217380	1614600	1884400	1347400	204350	121710	209730	660670	523460	812350	2460300	3517500	1240600	493990	486300	584810	536250	471520	548210	406540	538070	488180	466040	415300	C16666	ko00998,ko01100,ko01110
mws4002	154.09	137	153.079	C8H11NO2	[M+H]+	Dopamine	Alkaloids	Phenolamine	51-61-6	1	1398900	1186200	1495000	9573200	10021000	7628100	1225000	711700	1239600	3934400	2776000	2706300	12222000	22509000	8799900	2119100	1675400	2281200	2523300	2583600	2558600	2434700	2344800	2785000	2251400	2273800	C03758	ko00350,ko00950,ko00965,ko01100,ko01110
mws0885	153.02	109.03	154.027	C7H6O4	[M-H]-	2,4-Dihydroxybenzoic acid	Phenolic acids	Phenolic acids	89-86-1	1	1003400	696160	838700	1484500	838400	1175600	719750	432340	823610	242740	107570	218990	789870	549270	346060	262520	383320	354720	511850	361890	255270	338250	305540	180290	195340	102790	--	--
mws0180	153.02	109.03	154.027	C7H6O4	[M-H]-	2,5-Dihydroxybenzoic acid; Gentisic Acid	Phenolic acids	Phenolic acids	490-79-9	1	73082	55257	83293	27130	91691	80577	73437	56420	34679	146080	76970	188610	169290	151900	122820	132000	65309	88878	122610	87173	90145	135570	80543	114180	58425	112820	C00628	ko00350,ko01100
MWSmce264	153.06	123.05	154.063	C8H10O3	[M-H]-	Hydroxytyrosol	Phenolic acids	Phenolic acids	10597-60-1	3	6486	10197	11562	11991	17350	8991.4	4976.6	10193	6740.4	11046	5697	8674.8	19845	19265	15752	6931.1	7115.6	8247.5	9716.8	5504.8	9935.8	4966.3	6069.6	5437.9	7675	5832.9	--	--
mws0254	156.08	110	155.069	C6H9N3O2	[M+H]+	L-Histidine	Amino acids and derivatives	Amino acids and derivatives	71-00-1	1	1329400	1326300	1484100	1302600	1231300	680020	2017200	1707700	1259200	3800500	4535900	5314200	2655500	1675700	2308400	3860600	2538800	3164100	2165600	2225900	2253300	2013000	2328500	1983600	1954400	2016100	C00135	ko00340,ko00410,ko00970,ko01100,ko01110,ko01230,ko02010
pme2165	155.01	111	156.017	C5H4N2O4	[M-H]-	Orotic acid	Others	Vitamin	65-86-1	3	672750	580980	731870	300550	189960	209360	789450	859290	1015900	237420	337940	414910	174030	205100	407450	319730	356980	225780	409150	386200	427750	494700	416870	398120	467710	462560	C00295	ko00240,ko01100
pmb0819	157	130	156.069	C10H8N2	[M+H]+	3-Indoleacetonitrile	Alkaloids	Plumerane	771-51-7	3	66778	51507	82544	159860	208620	101980	112870	90473	114070	119280	68619	121610	237870	148000	162600	110730	60055	75072	135070	122580	145280	126190	135840	161350	154490	162420	C02938	ko00380,ko01100
pmf0174	157.16	157.2	158.167	C10H22O	[M-H]-	1-Decanol	Others	Saccharides and Alcohols	112-30-1	3	3956200	3609900	3891600	3541700	3213300	3198000	3453700	3434600	3085400	4288100	3960700	3802300	3532900	3731300	3808400	4104200	3631100	3631900	3580200	3407200	3680300	3903900	3479400	3760900	3361900	3448400	C01633	--
Lmbn001467	158.08	116.07	159.09	C7H13NO3	[M-H]-	5-Acetamidopentanoic Acid	Organic acids	Organic acids	1072-10-2	3	87817	73272	64337	94817	106770	86781	74515	68497	87364	79922	65246	69877	102710	85351	140650	94524	94175	79472	250490	279560	309970	319620	298560	300820	307610	290640	C03087	ko00310,ko01100
mws0987	161.06	115	160.052	C10H8O2	[M+H]+	6-MethylCoumarin	Lignans and Coumarins	Coumarins	92-48-8	3	9268.7	12709	15196	8875	10799	16504	14884	13690	7431	9036.2	12295	17171	12608	9280.8	15805	12483	15099	11015	8130.9	6730.6	8583	9386.4	7742.1	7264.6	6204.2	8091.4	--	--
Lmbn002072	159.07	97.07	160.074	C7H12O4	[M-H]-	2-Propylsuccinic acid*	Organic acids	Organic acids	618-57-5	3	51808	1392.2	1341	21354	21085	8485	75420	1391.8	1151.8	4943	481.25	7028.5	5370.8	2323.5	6593	5188	5642	5661.8	49837	38144	53601	48499	54414	40580	48128	36822	C16657	--
Zmjn001813	159.07	97.06	160.074	C7H12O4	[M-H]-	Pimelic acid*	Organic acids	Organic acids	111-16-0	3	43705	962.5	2294.5	16715	11305	11978	45277	1870.5	941.5	2823.5	4218	5883.8	2108.8	7726	1414.2	4800.8	4704.8	8067.8	39092	36046	28978	22400	28194	45007	51865	52233	C02656	ko00780,ko01100
mws0005	161.11	144	160.1	C10H12N2	[M+H]+	Tryptamine	Alkaloids	Plumerane	61-54-1	1	16915000	24167000	20288000	92415000	102420000	69855000	23852000	19204000	18625000	32220000	38358000	61285000	79606000	64697000	29965000	30329000	23576000	26687000	28227000	25336000	26754000	25958000	26453000	27786000	25880000	27915000	C00398	ko00380,ko00901,ko01100,ko01110
mws1417	160.04	116	161.048	C9H7NO2	[M-H]-	Indole-3-carboxylic acid	Alkaloids	Plumerane	771-50-6	3	93699	132940	147650	83569	88505	85298	150730	143620	132070	157890	111540	138740	124660	100630	63837	202920	111890	140400	155140	164690	157820	172350	160760	154780	186090	183190	C19837	--
mws0102	160.04	116	161.048	C9H7NO2	[M-H]-	Indole-5-carboxylic acid	Alkaloids	Plumerane	1670-81-1	3	67416	67847	85457	44602	52198	50884	93536	79023	67915	97143	74949	68999	77153	64750	38079	126900	63161	94775	88224	116930	112480	114230	104270	111340	99069	91074	--	--
Lmgp001898	162.06	116.05	161.048	C9H7NO2	[M+H]+	4,6-Dihydroxyquinoline	Alkaloids	Quinoline alkaloids	3517-61-1	1	4737.9	8531.2	8460.8	6565.5	2326.2	4500.7	9626.4	2623.3	8345.1	23056	11811	6027.2	8924.1	22186	10418	13813	13882	11322	7165.9	15778	6270.2	12515	17485	10472	13702	5249.2	C05639	ko00380,ko01100
pme3382	160.06	98	161.069	C6H11NO4	[M-H]-	N-Acetyl-L-threonine	Amino acids and derivatives	Amino acids and derivatives	17093-74-2	3	85250	75075	81613	93212	53736	82868	77814	102260	96749	88942	68639	71398	86372	70421	98811	70329	94659	61796	89521	98666	100600	112080	108060	92390	112430	96968	--	--
mws1346	162.08	98	161.069	C6H11NO4	[M+H]+	DL-2-Aminoadipic acid	Alkaloids	Alkaloids	542-32-5	3	257620	265350	262440	248120	281370	240580	208070	329140	263810	182280	224740	266730	238980	239920	214480	229740	226980	236160	512190	481370	477490	522750	550440	582930	523250	579580	C00956	ko00300,ko00310,ko00311,ko01100,ko01110,ko01210,ko01230
pme2761	161	73	162.016	C5H6O6	[M-H]-	4-Hydroxy-2-oxoglutaric acid	Organic acids	Organic acids	1187-99-1	3	98644	145700	132360	181740	131460	128830	131470	94148	140400	153880	97370	105270	114070	123670	152570	117960	127410	94661	99100	76989	97639	99146	116700	91908	133510	89110	C01127	ko00630,ko01100
pme2914	161.05	99	162.053	C6H10O5	[M-H]-	3-Hydroxy-3-methylpentane-1,5-dioic acid	Amino acids and derivatives	Amino acids and derivatives	503-49-1	1	115610	108460	122800	228600	225500	174140	145210	120820	119020	218670	222300	211770	617570	499900	511070	319250	307540	226080	4956500	6077700	6726300	6420400	5156000	6427500	6406300	6475300	C03761	--
MWS0559	161.05	71.01	162.053	C6H10O5	[M-H]-	1,6-anhydro-β-D-glucose	Others	Saccharides and Alcohols	498-07-7	3	13833	35554	52523	35112	18600	57889	111730	18296	23768	12463	34268	26322	41966	23679	31124	9440.8	12330	7649.5	45316	37805	47172	48740	53460	52111	31057	57526	--	--
pmf0440	163.08	91.1	162.068	C10H10O2	[M+H]+	4-MethoxycinnaMaldehyde	Phenolic acids	Phenolic acids	1963-36-6	3	162130	135350	153130	118370	133990	135990	135120	163710	139590	120250	135970	135500	160540	123590	176650	151000	141810	171520	65452	56997	57936	51959	79413	67261	74562	90197	C10475	--
pme2758	162.04	144	163.048	C5H9NO5	[M-H]-	4-Hydroxy-L-glutamic acid	Amino acids and derivatives	Amino acids and derivatives	3913-68-6	2	41620	26596	34485	21470	25288	13016	24141	29298	48093	30417	24248	17659	23062	8452.2	31589	42139	58961	30886	26741	31478	15769	22593	26472	32090	18048	26514	C03079	--
pme1419	164.07	104	163.067	C6H13NO2S	[M+H]+	L-Methionine methyl ester	Amino acids and derivatives	Amino acids and derivatives	10332-17-9	3	116300	114540	117130	62918	59703	60196	140900	176910	121370	112770	98459	141320	31071	39837	36197	150340	149610	147980	72965	61263	69391	75587	79092	78998	74401	79456	--	--
Lmbp000123	164.07	56.05	163.067	C6H13NO2S	[M+H]+	L-Homomethionine	Amino acids and derivatives	Amino acids and derivatives	25148-30-5	3	739300	979680	1195400	721680	707910	283020	1038800	1345700	915700	1148100	870190	682000	344460	181490	360680	1912800	812340	1109700	656120	746410	833180	789360	861340	812100	686470	668080	C17213	ko00966,ko01110,ko01210
mws1641	165.04	120.02	164.033	C6H4N4O2	[M+H]+	Lumazine	Nucleotides and derivatives	Nucleotides and derivatives	487-21-8	3	24837	52785	41284	19316	38052	36475	51358	90406	35165	49420	34057	74613	19460	25482	23049	34397	36082	45673	28499	26447	34975	27026	33727	28741	36182	22138	C03212	--
Lmmn001643	163.04	119.05	164.047	C9H8O3	[M-H]-	2-Hydroxycinnamic acid	Phenolic acids	Phenolic acids	583-17-5	3	3067000	6059400	6365600	3731500	6680700	4546400	7276500	8807700	3054000	5575000	2892700	8321300	5292300	3004900	2707900	2832600	2540200	4764900	3234300	3361400	3580700	3281500	3510000	3285200	3136200	3421800	C01772	ko00360,ko00940,ko01100,ko01110
pmb0142	165.1	95.2	164.047	C9H8O3	[M+H]+	Caffeic aldehyde	Phenolic acids	Phenolic acids	141632-15-7	3	296340	333110	297850	257550	254190	264790	370270	388120	396610	289850	301320	297550	279000	232790	240000	306460	300160	319230	228310	234680	224190	232670	239010	248260	238030	243710	C10945	ko00940,ko01110
MWSCX017	165.05	119.05	164.047	C9H8O3	[M+H]+	4-hydroxyphenyl acrylaldehyde	Others	Others	-	3	320460	515540	411820	350960	573460	369470	639940	522650	320130	446880	260560	635770	378880	261650	261740	244250	263970	348890	259200	290360	299490	244290	282650	298520	340830	311830	--	--
mws0159	163.04	91	164.047	C9H8O3	[M-H]-	Phenylpyruvic acid	Organic acids	Organic acids	156-06-9	2	3068900	2930300	3030400	2931700	3113500	2936000	2904500	2934000	3311900	2602400	2658600	2586400	2537600	2361100	2539300	2563700	2666800	2521700	2321100	2215800	2095500	2350500	2112000	2260900	1978600	2275500	C00166	ko00360,ko00400,ko00960,ko01100,ko01110,ko01210,ko01230
Lmbn002739	163.04	119.05	164.047	C9H8O3	[M-H]-	3-Hydroxycinnamic Acid	Phenolic acids	Phenolic acids	14755-02-3	3	338400	348060	396340	116040	132110	128350	489520	534530	333150	628610	454930	741400	165460	267040	254860	619040	666110	554580	294520	374940	260900	266100	294930	291800	325910	321780	C12621	ko00360,ko01100
pme1439	165.05	119	164.047	C9H8O3	[M+H]+	p-Coumaric acid	Phenolic acids	Phenolic acids	501-98-4	2	8424400	12020000	11622000	11933000	8654800	6491400	10528000	4130800	7208900	17768000	9212000	8986700	12979000	7598900	11545000	13467000	10895000	9264800	8945200	10985000	5298800	5552600	8587600	6751000	6355700	5476200	C00811	ko00130,ko00350,ko00940,ko00950,ko00998,ko01100,ko01110
pme2529	163.2	101	164.068	C6H12O5	[M-H]-	1,5-Anhydro-D-glucitol	Others	Saccharides and Alcohols	154-58-5	3	87018	116880	72218	107100	77902	111740	82024	102250	95918	193610	138360	238870	111630	97796	98989	70613	87609	117030	64191	65186	87348	92718	37966	53129	44055	54548	C07326	--
mws0854	163	59.01	164.068	C6H12O5	[M-H]-	Rhamnose	Others	Saccharides and Alcohols	3615-41-6	3	174350	184420	172730	192690	195370	184230	200900	193800	181810	203340	264890	221170	186610	256010	283890	197730	243810	205090	140400	162300	196310	168370	183410	186620	175940	167330	C00507	ko00051,ko01100
pme3083	164.04	120	165.043	C8H7NO3	[M-H]-	2-(Formylamino)benzoic acid	Phenolic acids	Phenolic acids	3342-77-6	3	437920	988430	801330	797650	1114600	885300	1061700	1266800	605140	604440	369810	900780	477410	201400	298780	275490	353030	527130	549330	642850	651410	609980	600640	637610	530140	627000	C05653	ko00380,ko01100
pme2617	166.05	102	165.046	C5H11NO3S	[M+H]+	L-Methionine Sulfoxide	Amino acids and derivatives	Amino acids and derivatives	3226-65-1	3	5078200	4064000	4246900	4906500	5320000	4947900	5183000	4751200	5739600	5115800	5555000	4275900	1388900	4101000	5439200	5123600	7021600	5172200	8473300	7872800	7612000	7588900	8033100	7969200	7978800	7767300	C02989	ko00270
pme3968	166.07	149.05	165.065	C6H7N5O	[M+H]+	7-Methylguanine	Nucleotides and derivatives	Nucleotides and derivatives	578-76-7	3	42396	43754	59519	9	9	9	51122	78069	51510	9	9	9	9	9	9	9	9	9	31914	25138	33271	28769	24198	40826	31989	30301	C02242	--
MWS4525	166.07	124.05	165.065	C6H7N5O	[M+H]+	6-O-methylguanine	Nucleotides and derivatives	Nucleotides and derivatives	20535-83-5	1	57476	80442	97412	87219	27656	22695	77450	120280	114080	18619	4727.7	33348	9	6332.4	9	9	6231.7	20082	68039	51635	57093	65020	42835	65928	64757	62807	--	--
pme0021	166.09	120.08	165.07	C9H11NO2	[M+H]+	L-Phenylalanine	Amino acids and derivatives	Amino acids and derivatives	63-91-2	1	15255000	15511000	15756000	15213000	16497000	12926000	20113000	18837000	18436000	17774000	11979000	13495000	13066000	12265000	14957000	15129000	11808000	13452000	14767000	14330000	14542000	14119000	16112000	16246000	15966000	15656000	C00079	ko00360,ko00400,ko00460,ko00940,ko00960,ko00966,ko00970,ko00998,ko01100,ko01110,ko01210,ko01230,ko02010
pmb0037	166.12	121.3	165.115	C10H15NO	[M+H]+	Hordenine	Alkaloids	Phenolamine	539-15-1	3	539180	698790	630380	3032200	2935800	1661700	839180	717960	694840	697800	1024400	1387700	2056500	2403900	973520	797580	1032400	1009200	614710	608780	651140	668800	695390	739860	725830	834810	C06199	ko00350,ko01100
pme0282	165.02	77.04	166.027	C8H6O4	[M-H]-	Phthalic acid	Phenolic acids	Phenolic acids	88-99-3	1	358110	406160	395350	362450	357530	346600	309040	365280	390380	280810	270070	282040	292140	329000	275720	265600	211910	261590	249370	283470	274540	268170	304640	289900	265370	252390	C01606	ko01100,ko02010
pme0281	165.02	121.03	166.027	C8H6O4	[M-H]-	Terephthalic acid	Phenolic acids	Phenolic acids	100-21-0	1	5900400	6291800	6956900	5474600	5556600	5789000	5225300	5950500	5316300	4533600	4208000	4302400	4716200	4986900	4979600	4749200	3759900	3926400	4569200	4442100	4313600	4456600	4557300	4874400	4608100	4399600	C06337	ko01100
pmc0274	167.1	121.1	166.031	C6H6N4S	[M+H]+	6-Methylmercaptopurine	Nucleotides and derivatives	Nucleotides and derivatives	50-66-8	3	15499000	15326000	16447000	14947000	16817000	12419000	19851000	18684000	18242000	17592000	12656000	14575000	13502000	12785000	14838000	15388000	11929000	13505000	14530000	14288000	14683000	14404000	15773000	16684000	16362000	16110000	C16614	--
mws0344	165.04	75	166.048	C5H10O6	[M-H]-	D-Xylonic acid	Organic acids	Organic acids	526-91-0	1	1916100	1982400	1968100	2913900	2669200	2938700	2028300	2155200	2500400	1962500	1860500	1664200	2431700	2386100	2921500	2045600	1632200	1982100	2126800	2238600	1768000	2386700	2161800	2207000	2216500	2482500	C00502	ko00040,ko01100
Lmrn003000	165.06	103.06	166.063	C9H10O3	[M-H]-	2-Hydroxy-3-phenylpropanoic acid	Phenolic acids	Phenolic acids	7326-19-4	1	2380.2	5306.2	3522.2	28282	23242	30546	15291	6046	7009.8	128830	93158	90552	117030	101940	110960	95584	77871	109400	39574	49217	51092	51938	73018	74282	66225	46070	C05607	ko00360,ko00960,ko01100
Lmbn005172	165.06	119.05	166.063	C9H10O3	[M-H]-	2,6-Dimethoxybenzaldehyde	Phenolic acids	Phenolic acids	3392-97-0	1	8771.8	8760.5	13333	69522	58776	52508	16385	13421	16474	162980	176210	162580	166390	183480	188780	151320	139060	123820	89434	86697	86737	82111	84048	103000	77888	99352	--	--
MWSmce528	167.07	124.05	166.063	C9H10O3	[M+H]+	2,3-Dimethoxybenzaldehyde	Phenolic acids	Phenolic acids	86-51-1	3	2442.7	5457.9	3831	1023.4	3037.3	1567.6	5639.5	4731.3	4332.8	1930.3	3309	2289.2	4552.3	4561.5	2079.4	3269.4	813.51	4921.3	1454.3	936.96	2470	2848.4	2487.7	1836.3	3183.6	2996.1	--	--
pmn001681	165.09	149.06	166.099	C10H14O2	[M-H]-	1-(4-Methoxyphenyl)-1-propanol	Phenolic acids	Phenolic acids	5349-60-0	3	245860	235150	212420	173190	179160	209130	248890	271670	223240	216820	192900	229890	184870	190010	157770	217370	201640	264120	94952	87578	109460	131940	104820	102000	84997	119380	--	--
NK10253223	168.06	94.06	167.058	C8H9NO3	[M+H]+	2-Amino-3-methoxybenzoic acid	Phenolic acids	Phenolic acids	3177-80-8	1	482880	560070	595590	613080	591200	768670	593430	711120	694850	412530	456400	406670	562130	553140	540160	409790	372260	317030	474180	440480	458620	484510	448270	467630	497050	525620	C05831	ko00380
Zmjp000624	168.06	150.05	167.058	C8H9NO3	[M+H]+	Pyridoxal	Others	Vitamin	66-72-8	1	426040	533120	535520	596910	577120	633760	587380	692140	609580	400160	415850	353510	524440	487700	529950	365940	330300	333340	409790	409830	418700	447110	423600	442700	434920	435680	C00250	ko00750,ko01100
Hmtp000776	168.07	105.03	167.059	C8H9NO3	[M+H]+	4,5,6-Trihydroxy-2-cyclohexen-1-ylideneacetonitrile	Alkaloids	Alkaloids	-	3	285830	301720	301920	274780	316820	240490	381020	352800	358050	323250	229830	256620	243510	236580	257800	290040	216070	253930	273640	272790	271820	279040	286710	329590	303820	303540	--	--
mws2125	166.98	78.7	167.982	C3H5O6P	[M-H]-	Phosphoenolpyruvate	Organic acids	Organic acids	138-08-9	3	188070	71850	63352	7845.2	3122	4446.5	238850	179690	115640	527000	459690	186010	5613.5	1113.5	9184.5	966250	1259800	1581200	158220	198290	168070	204270	189120	159910	201930	157480	C00074	ko00010,ko00020,ko00400,ko00440,ko00620,ko00710,ko00998,ko01100,ko01110,ko01200,ko01230
MWSmce501	167.04	108.02	168.042	C8H8O4	[M-H]-	Protocatechuic Acid Methyl Ester	Phenolic acids	Phenolic acids	2150-43-8	3	51930	22796	18948	36691	29289	26237	44601	31585	21714	111870	56592	106670	78738	120710	93576	57370	66162	88633	107830	108890	142920	141320	130520	140050	147210	136810	--	--
Hmbp001276	169.05	65.03	168.042	C8H8O4	[M+H]+	Gallacetophenone	Phenolic acids	Phenolic acids	528-21-2	1	56481	50427	49323	30773	35658	33330	70538	42039	46700	151420	136370	85451	118870	130070	123720	130430	144690	136290	83535	90374	84749	89749	88220	89265	82786	92270	--	--
pme1292	167.1	123.04	168.042	C8H8O4	[M-H]-	Homogentisic acid	Phenolic acids	Phenolic acids	451-13-8	3	208940	207400	185240	83578	56577	40020	73931	156830	202890	294900	115460	61423	44329	155030	138970	31576	19521	57825	270020	193500	296410	276200	267380	214080	267650	261230	C00544	ko00130,ko00350,ko01100
mws0028	167.03	108.02	168.042	C8H8O4	[M-H]-	Vanillic acid	Phenolic acids	Phenolic acids	121-34-6	1	329940	538320	466240	276480	528940	427280	349900	537180	422230	276580	396210	349580	482600	516370	185440	328160	277040	400980	300540	297360	334600	304020	339790	324660	301480	322080	C06672	--
pme2598	167.03	123.04	168.042	C8H8O4	[M-H]-	3,4-Dihydroxybenzeneacetic acid	Phenolic acids	Phenolic acids	102-32-9	3	1529600	1850300	1670900	3412900	3332200	2908400	1679000	1689200	1663600	3722900	2431400	2992500	5717300	5435800	3073700	2616000	2856200	1867800	2477400	2029000	2201000	2358700	2569400	2472900	2787700	2897000	C01161	ko00350,ko01100
Zmsp001834	169.05	65	168.042	C8H8O4	[M+H]+	2,6-Dimethoxy-1,4-benzoquinone	Quinones	Quinones	530-55-2	1	602910	567330	716180	440520	427320	434610	558690	659650	636710	569480	597760	454020	674830	761580	866970	622210	482640	613260	788840	678930	753350	751680	746360	725270	857690	806700	C10331	--
MWSmce490	167.04	123.05	168.042	C8H8O4	[M-H]-	2',4',6'-Trihydroxyacetophenone	Phenolic acids	Phenolic acids	480-66-0	3	15174	26264	16286	18923	34624	31267	15903	4397.9	12056	11791	8608.5	9856.5	27345	20820	22107	11860	6427.1	9040.2	20885	17110	22923	18574	18991	18673	11822	24021	C21895	--
MWSslk066	169.05	65.04	168.042	C8H8O4	[M+H]+	3-Hydroxy-4-methoxybenzoic acid	Phenolic acids	Phenolic acids	645-08-9	3	167750	287020	231680	181800	297890	201390	172800	236110	190960	199620	277290	237850	357530	285040	99115	208690	212300	297710	191210	214210	198940	185630	193480	217690	222440	214720	--	--
MWStz091	169.1	70.07	168.09	C8H12N2O2	[M+H]+	Cyclo(L-Ala-L-Pro)	Amino acids and derivatives	Amino acids and derivatives	36357-32-1	3	81663	99003	93726	70972	76273	71174	114910	129530	86725	124060	109000	121390	63586	70260	67042	138180	138740	140270	73283	72014	74484	72545	74407	75463	79459	81386	--	--
pme1383	170.08	134.1	169.074	C8H11NO3	[M+H]+	Pyridoxine	Others	Vitamin	65-23-6	1	255000	474080	527580	580170	556150	516360	840920	815340	570920	347290	441230	426910	358500	295310	282230	814390	744310	824530	266160	279440	279220	293930	303480	289670	293220	294550	C00314	ko00750,ko01100
MWS0933	170.09	124.09	169.085	C7H11N3O2	[M+H]+	1-Methylhistidine	Amino acids and derivatives	Amino acids and derivatives	332-80-9	3	60539	33342	65588	70493	46589	55788	46985	42004	85306	57770	70342	41435	38148	31075	41542	69290	42256	65472	56388	43140	49254	42075	59853	58231	46474	56612	--	--
pme0181	170.09	124	169.085	C7H11N3O2	[M+H]+	3-Methyl-L-Histidine	Amino acids and derivatives	Amino acids and derivatives	368-16-1	3	24624	27794	14903	23670	22243	18183	20120	19414	26543	12572	19076	38051	14981	22190	18126	30098	27754	20911	22707	26552	29814	45142	25913	35086	37719	30838	C01152	ko00340,ko01100
Zmzn000078	168.99	78.96	169.998	C3H7O6P	[M-H]-	Dihydroxyacetone phosphate	Others	Saccharides and Alcohols	57-04-5	3	100690	79927	84159	7338.5	6539.4	10683	99031	64095	57768	162770	151220	80490	5859.7	13585	11273	143310	160490	155500	60631	56001	51040	82142	68907	65402	49005	71375	C00111	ko00010,ko00040,ko00051,ko00052,ko00561,ko00562,ko00564,ko00640,ko00710,ko00760,ko01100,ko01110,ko01200,ko01230
pme3186	169	79	169.998	C3H7O6P	[M-H]-	DL-Glyceraldehyde-3-phosphate	Organic acids	Organic acids	591-59-3	3	146770	128480	151620	20761	7494	18149	236010	148190	135300	207280	210620	143900	18383	23751	27952	354560	269650	343320	165920	118060	143950	172920	131210	123430	127600	141560	C00661	--
MWSslk138	169.01	151	170.022	C7H6O5	[M-H]-	2,3,4-Trihydroxybenzoic acid	Phenolic acids	Phenolic acids	610-02-6	2	115980	145180	206290	91488	106360	99464	134130	160680	129700	106600	64900	100780	117440	197050	166450	73219	67035	44842	74468	87759	104190	81795	76007	85012	87928	99797	--	--
Hmln008318	169.12	151.11	170.131	C10H18O2	[M-H]-	8-Methyl-6-nonenoic acid	Organic acids	Organic acids	59320-77-3	3	5709.2	5422.4	5667.7	2894.7	1942.7	1789.9	3330.3	3733.9	3971.1	5157.2	5291.8	5596.9	2819.4	3778.4	4551.1	5962.4	5166.3	5282.3	4141	4559.1	4504.6	2448.9	4121.8	4850.7	3822.9	4020	C18202	ko00998,ko01100,ko01110
MWS1812	171.17	55.05	170.167	C11H22O	[M+H]+	2-Undecanone	Others	Others	112-12-9	3	12701	5413.1	13318	7505.7	4851.4	4602.9	12566	17121	24703	7032	5517.3	2989.2	2197.4	15029	15073	3009.1	9732.1	6992.5	57788	49189	58089	61673	44974	45259	61573	51381	C01875	--
Lmbn003524	171.1	99.08	172.11	C9H16O3	[M-H]-	9-Oxononanoic acid	Organic acids	Organic acids	2553-17-5	3	10360	8553.1	8132.4	5181.2	6987.3	5430.9	6306.3	11390	12658	4243.3	6942.6	7362.3	7619.9	6738.6	7663	8657.3	6205	5948.7	17553	21092	15783	16026	17239	17983	19538	20677	C16322	ko00592,ko01110
MWSmce584	138.09	77.04	173.061	C8H11NO	[M-Cl]+	Tyramine	Alkaloids	Alkaloids	60-19-5	2	730080	792230	763640	936630	1097100	1018200	751280	704370	850040	534510	597470	658400	694560	659450	457660	572200	595180	506480	769220	644340	651670	638910	726630	673660	720050	711380	--	--
pme0253	174.11	86	173.105	C8H15NO3	[M+H]+	N-Acetyl-L-leucine	Amino acids and derivatives	Amino acids and derivatives	1188-21-2	3	32701	53886	41135	42201	38668	33974	47564	56258	41078	63902	64168	42342	62724	40234	50635	57115	48138	53108	60269	59839	49460	60260	78458	60576	59860	61155	C02710	--
pme3009	175.02	99	174.016	C6H6O6	[M+H]+	Trans-Citridic acid	Organic acids	Organic acids	4023-65-8	2	548970	553690	579700	576710	874080	564800	514720	573730	637820	726220	220540	397500	658710	569540	422180	142760	237090	150260	635010	593230	877990	209570	320770	662180	575860	522420	C02341	ko00660,ko01100
MA10039492	173.01	71.03	174.016	C6H6O6	[M-H]-	Dehydroascorbic acid	Others	Vitamin	490-83-5	1	577990	561690	632770	667230	556200	660400	720590	685140	657180	599150	750550	974800	423420	462090	327520	1137200	1142200	924420	379590	421080	426170	411900	508560	507950	412110	573370	C05422	ko00053,ko00480,ko01100
mws0242	173.08	111	174.089	C8H14O4	[M-H]-	Suberic Acid	Organic acids	Organic acids	505-48-6	2	61782	54564	60388	74492	107210	69084	55534	109520	118600	104540	73964	102110	37167	38116	30194	70692	106950	123850	73504	81046	71869	88262	85582	71981	89246	80326	C08278	--
Lmgn002555	173.08	59.01	174.089	C8H14O4	[M-H]-	2-Propylglutaric acid	Organic acids	Organic acids	32806-62-5	2	827420	970970	1032400	2546700	2680300	2899400	1581600	967480	1054700	17476000	13264000	11913000	16185000	14980000	17339000	16777000	14501000	17633000	10127000	10625000	10221000	10476000	10492000	9461600	10142000	10133000	C16658	--
Zmyn000155	173.11	131.08	174.1	C7H14N2O3	[M-H]-	N-α-Acetyl-L-ornithine	Amino acids and derivatives	Amino acids and derivatives	6205-08-9	1	69748	60382	58846	530330	553930	110700	126300	36183	80838	253290	131500	174420	915010	810730	4928000	233190	72735	129630	317190	239740	249050	297020	320420	320210	314870	270120	C00437	ko00220,ko01100,ko01110,ko01210,ko01230
mws0260	175.12	116	174.112	C6H14N4O2	[M+H]+	L-Arginine	Amino acids and derivatives	Amino acids and derivatives	74-79-3	1	568320	520340	835980	2836300	3633400	1053700	1354000	672780	509850	1572300	1088400	1206600	1730600	5294100	10744000	1730300	719170	1243300	1364200	1246500	1705300	1487600	2006700	1999200	1749700	1440500	C00062	ko00220,ko00261,ko00330,ko00472,ko00970,ko01100,ko01110,ko01230,ko02010
pme2559	174.04	88	175.048	C6H9NO5	[M-H]-	N-Acetyl-L-Aspartic Acid	Amino acids and derivatives	Amino acids and derivatives	997-55-7	3	47692	36661	59959	72391	59397	50443	48530	51089	49046	34536	42113	27292	62467	30043	61050	53191	33260	55232	72707	96469	109570	96232	93900	101660	82968	90271	C01042	ko00250,ko01100
pme0008	176.1	113	175.096	C6H13N3O3	[M+H]+	L-Citrulline	Amino acids and derivatives	Amino acids and derivatives	372-75-8	2	48403	12458	22401	77183	103510	29996	30787	33042	43927	83816	102040	131670	93869	106670	175370	123250	61676	117790	62693	68248	52192	75413	67786	79420	88215	67880	C00327	ko00220,ko01100,ko01110,ko01230
MWSmce690	175.02	59.01	176.032	C6H8O6	[M-H]-	Erythorbic Acid; Isoascorbic Acid	Others	Vitamin	89-65-6	1	190050	322890	306820	734700	415030	476080	351410	372770	281190	530800	690790	2614700	648980	530110	468480	1431300	2480500	2114800	274940	270470	282610	307530	301460	279580	260570	311080	--	--
mws1075	177.05	121	176.047	C10H8O3	[M+H]+	7-Methoxycoumarin	Lignans and Coumarins	Coumarins	531-59-9	2	14882	11933	13588	17453	26412	20178	14463	18140	17440	14133	15383	2229.5	22926	17161	1769.8	9526.7	17184	11973	8768.5	6113.6	6917.5	9669.3	8930.4	7364.6	8368.3	6994.7	C09268	--
Zmgn001448	175.06	115.04	176.068	C7H12O5	[M-H]-	2-Propylmalic Acid*	Organic acids	Organic acids	-	2	1850700	1539100	2161300	704740	557490	992470	3157300	2135100	2668800	2160900	2745100	2719500	1547700	2106800	2702200	2737600	2900200	3026800	1861000	2305800	2286000	2392500	2377600	2417100	2493700	2109700	C05994	ko00620
Lmbn001754	175.06	115.04	176.068	C7H12O5	[M-H]-	3-Isopropylmalic Acid*	Organic acids	Organic acids	921-28-8	2	1803900	1826400	2107300	682440	580480	1034600	3222800	2006300	2642400	2199500	2836400	2637700	1593600	2078900	3079900	2565800	2994400	3078800	1923000	2468300	2268800	2166500	2294100	2555200	2193700	2009100	C04411	ko00290,ko01100,ko01110,ko01210,ko01230
pmb3101	175.06	115	176.068	C7H12O5	[M-H]-	2-Isopropylmalic Acid	Organic acids	Organic acids	49601-06-1	1	1776400	1781100	1912800	587820	665390	999470	2900300	1927200	2345600	1957700	2594000	2534200	1452200	1899400	2784800	2653600	2834800	2889300	1793100	2052100	2147600	2155900	2113600	2216200	1958800	2117000	C02504	ko00290,ko00620,ko01100,ko01110,ko01210,ko01230
pme2024	177.1	160	176.095	C10H12N2O	[M+H]+	Serotonin*	Alkaloids	Plumerane	50-67-9	1	2109300	3062200	2604400	11430000	15006000	8575900	2012900	1713800	2069500	3176700	2302300	3585200	10573000	11691000	4579000	1524000	960290	1117500	3860800	3556000	3540500	3694900	3556300	3560600	3795300	3756100	C00780	ko00380,ko01100
pmb0774	177.1	160.3	176.095	C10H12N2O	[M+H]+	N-Hydroxytryptamine*	Alkaloids	Plumerane	-	1	1958000	2852500	2371300	10255000	13957000	8092100	1790300	1549100	1984800	3029800	2116700	3026500	9993600	10588000	4184100	1507700	885830	980590	3459000	3187200	3381200	3432800	3297500	3662900	3665700	3567700	C17203	ko00380,ko01100
pmb0468	178	161	177.046	C6H11NO3S	[M+H]+	N-Formyl-L-Methionine	Amino acids and derivatives	Amino acids and derivatives	4289-98-9	3	43107	59776	52632	215260	301220	169420	41619	29726	44307	76178	50565	80768	205110	232890	96418	31152	26386	21241	83415	69803	66965	76726	77530	81195	82164	71210	C03145	ko00270
mws1013	177.02	133.2	178.027	C9H6O4	[M-H]-	Esculetin	Lignans and Coumarins	Coumarins	305-01-1	1	1506400	1377300	1899900	1445900	1350000	1252200	1718400	1765700	1657300	374140	247770	375710	426450	456390	442690	367700	324270	544740	520640	600190	961780	829620	697950	448860	772070	839510	C09263	--
Hmsp003093	179.03	77.04	178.027	C9H6O4	[M+H]+	3,7-Dihydroxychromen-4-one	Others	Others	-	3	98795	106570	80527	60216	41710	80402	59058	87648	89956	52195	49286	57959	59780	49461	80211	53434	35392	47861	72944	53719	71893	67804	66243	66431	59000	78242	--	--
MWSmce220	177.04	59.02	178.048	C6H10O6	[M-H]-	D-Glucono-1,5-lactone	Organic acids	Organic acids	90-80-2	3	690790	768150	667660	1176000	1402500	1266600	832890	900850	779440	896080	969470	1137300	1435500	1642800	1475600	898630	846120	754070	720320	664500	724250	802550	781650	675950	545100	660980	C00198	ko00030,ko01100,ko01110,ko01200
mws1195	179.07	147.1	178.063	C10H10O3	[M+H]+	p-Coumaric acid methyl ester*	Phenolic acids	Phenolic acids	3943-97-3	2	139830	166120	142440	177850	214320	158670	217480	212760	145600	178490	151020	238340	189010	149590	185370	157120	169470	130380	151990	143430	146300	165650	146090	209320	168820	181910	--	--
mws0009	179.07	91	178.063	C10H10O3	[M+H]+	Coniferaldehyde	Phenolic acids	Phenolic acids	20649-42-7	2	47440	44793	32482	12521	22884	18001	32064	45589	44279	66611	66880	75373	8033.6	13892	8419.6	84488	98894	85855	31685	50248	38106	55910	72155	49935	53193	44232	C02666	ko00940,ko01100,ko01110
pmb2795	177	145	178.063	C10H10O3	[M-H]-	4-Methoxycinnamic acid*	Phenolic acids	Phenolic acids	830-09-1	3	155220	231730	218230	297140	443630	271850	351960	347430	192920	317310	237660	411820	316790	284840	238630	252690	303450	245280	318590	336300	350730	382620	369580	405130	406940	389420	--	--
mws1200	177	145	178.063	C10H10O3	[M-H]-	Trans-4-Hydroxycinnamic Acid Methyl Ester	Phenolic acids	Phenolic acids	19367-38-5	1	135520	163480	170230	171120	198190	156940	200100	184540	144540	162520	136380	214880	176900	140130	137330	145860	150530	143380	133590	146420	151770	163480	162990	170250	160810	153460	--	--
Jmzn006005	177.06	117.04	178.063	C10H10O3	[M-H]-	3,4-methylenedioxy cinnamyl alcohol	Lignans and Coumarins	Lignans	58095-76-4	1	174790	231670	241640	231630	279120	205110	278360	262190	205440	251150	208840	281140	236450	212220	191110	207580	228090	212580	210820	196140	204380	221730	210360	235660	250350	224770	--	--
mws0981	178.04	136.02	179.044	C6H5N5O2	[M-H]-	Isoxanthopterin	Nucleotides and derivatives	Nucleotides and derivatives	529-69-1	1	2129.7	2829.7	3845	19343	8854.3	19868	4767.1	6013.1	4256.7	17578	16708	16478	22427	31464	23321	16065	15071	11709	14888	8005.1	10995	16544	16450	12246	13931	10297	C03975	--
pmb0786	180.09	163.06	179.079	C6H13NO5	[M+H]+	D-Glucosamine	Others	Saccharides and Alcohols	3416-24-8	3	654460	702630	758750	673420	682580	700820	903610	674610	603700	950260	735670	942390	926340	921140	845040	828450	725230	759180	702830	902830	1025000	650800	455850	862760	1190900	639150	C00329	ko00520,ko01100
MWSmce001	181.05	107.05	180.042	C9H8O4	[M+H]+	5-Acetylsalicylic acid	Phenolic acids	Phenolic acids	13110-96-8	3	71864	34652	64148	55276	40770	38191	31817	48352	71070	47555	41692	28357	43729	70844	55408	34156	25884	16336	49461	50741	57193	48710	58379	65661	57251	56540	--	--
mws2212	179.03	135.05	180.042	C9H8O4	[M-H]-	Caffeic acid	Phenolic acids	Phenolic acids	331-39-5	1	359420	459280	576200	335220	491550	390500	405350	562930	362630	295330	242540	235880	336490	289680	275110	367810	273380	393070	288390	260370	261440	236730	221770	198020	212010	190020	C01197	ko00940,ko01100,ko01110
pmf0138	179.06	59	180.063	C6H12O6	[M-H]-	D-Mannose*	Others	Saccharides and Alcohols	3458-28-4	1	1158100	1866200	1439200	2020900	1801700	2184400	2805100	1889900	2009800	945130	1098300	830330	1140100	1801100	1906500	908650	1294900	1225400	1926500	2382800	2458600	2051000	2069900	2746500	2282400	2275400	C00159	ko00051,ko00052,ko00520,ko01100,ko02010
Hmln000297	179.05	59.01	180.063	C6H12O6	[M-H]-	Inositol*	Others	Saccharides and Alcohols	87-89-8	1	660870	1379100	1070700	1123700	1298500	1824600	1458000	1254800	1397400	735450	663120	1033300	917260	1064600	1533400	954590	805300	634450	1350400	1734700	1651100	1431600	1208400	1535700	1300200	1764000	C00137	ko00052,ko00053,ko00562,ko01100,ko01110,ko02010,ko04070
mws4170	179.06	59.01	180.063	C6H12O6	[M-H]-	D-Glucose*	Others	Saccharides and Alcohols	14431-43-7	1	702600	1315900	1310500	1156700	1167700	1319700	1214300	1019500	1492600	617300	647130	922830	825990	1159600	1816000	916440	912760	635540	1308800	1677300	1581300	1504500	1483500	981070	1493400	1643400	C00031	ko00010,ko00030,ko00052,ko00500,ko00520,ko00901,ko01100,ko01110,ko02010
mws1164	179.06	59.01	180.063	C6H12O6	[M-H]-	D-Fructose*	Others	Saccharides and Alcohols	7660-25-5	1	746670	1245700	1089500	1115000	1339400	1725500	1594700	1793200	1481100	672270	509620	761380	1159700	1387000	1278700	1098000	958870	768520	1294000	1386600	1030400	1539200	1757700	1723100	1344400	1290900	C05003	--
pmf0139	179.06	59	180.063	C6H12O6	[M-H]-	D-Galactose*	Others	Saccharides and Alcohols	59-23-4	1	551840	648820	594850	1439300	1245600	1295100	621300	669420	753560	837890	974910	763810	1312500	1876400	1431200	566170	656250	501670	536130	603430	562760	573430	601590	565440	582650	708630	C00124	ko00052,ko01100
mws0663	181.07	124	180.065	C7H8N4O2	[M+H]+	1,7-Dimethylxanthine	Nucleotides and derivatives	Nucleotides and derivatives	611-59-6	3	453.9	5428.8	1347.8	7708.2	6511.3	9001.5	14105	12597	11359	16226	12032	15226	675.39	454.49	449.32	15322	9903.9	17386	7411.6	7691.7	9486	6086.7	5640.8	7196.1	10169	11296	C13747	ko00232,ko01100,ko01110
MWS2070	179.07	92.03	180.079	C10H12O3	[M-H]-	Propyl 4-hydroxybenzoate	Phenolic acids	Phenolic acids	94-13-3	3	6418.9	9533.5	10512	55338	57592	45760	114440	132180	118100	185970	152560	117320	5223.3	7061.2	7347	129250	102160	165390	38696	38593	42363	39384	37845	40917	40587	39298	--	--
Lmbn004847	179.07	146.04	180.079	C10H12O3	[M-H]-	4-Methoxyphenylpropionic acid	Phenolic acids	Phenolic acids	-	3	1750	4132	12247	1143	6454.2	4008.2	7560	4612.2	9289.2	6448.2	3482.5	9866.8	4682.5	2931	2284	3480.2	8204	10500	5816	8656	7502	7038.8	8732.8	6406.8	6934	6476.8	--	--
mws0093	179.07	146	180.079	C10H12O3	[M-H]-	Coniferyl alcohol	Phenolic acids	Phenolic acids	458-35-5	2	15753	30168	26897	15755	13508	31932	29688	32670	21566	26388	16067	35701	11228	9425.8	8091.2	25307	17476	33281	31167	38965	37064	40635	33490	27206	39184	36800	C00590	ko00940,ko00998,ko01100,ko01110
Cmyp007180	181.12	107.09	180.115	C11H16O2	[M+H]+	Dihydroactinidiolide	Others	Others	17092-92-1	1	863340	951940	863340	756360	799790	713800	1212700	1274600	1229100	818410	697500	714260	669930	491570	585890	886860	690260	874850	593430	611120	621360	639150	666290	615340	584160	623590	--	--
Hmcp009963	180.14	123.07	180.138	C11H18NO+	[M]+	Candicine	Alkaloids	Phenolamine	6656-13-9	1	211260	154290	162520	142950	125970	153780	124140	154820	165320	227290	205100	199110	232300	257390	243460	307130	272880	219780	174090	197920	193140	195080	191310	199260	188010	204700	C10575	--
mws0250	182.08	136.1	181.074	C9H11NO3	[M+H]+	L-Tyrosine	Amino acids and derivatives	Amino acids and derivatives	60-18-4	1	17497000	17047000	17546000	25988000	27749000	20007000	23166000	23036000	22149000	22789000	19543000	23054000	26927000	24336000	22556000	26281000	18265000	20259000	21765000	21853000	21564000	27323000	22323000	22371000	22335000	22066000	C00082	ko00130,ko00261,ko00350,ko00360,ko00400,ko00460,ko00730,ko00940,ko00950,ko00965,ko00966,ko00970,ko00998,ko01100,ko01110,ko01210,ko01230
Zmsp000878	182.08	136.08	181.074	C9H11NO3	[M+H]+	4-Hydroxy-5-(2-oxo-1-pyrrolidinyl)benzoic acid	Alkaloids	Pyrrole alkaloids	-	1	4658600	4357500	3949600	6436000	8140600	4983500	5768500	6021400	5932300	5865400	4714900	5504500	7720400	6100300	5839300	6594800	4629400	5287500	5184500	4913000	5240700	6723600	5559600	5063100	5468000	5318800	--	--
MWStz070	182.08	91.05	181.074	C9H11NO3	[M+H]+	N-(2-Hydroxy-4-methoxyphenyl)acetamide	Alkaloids	Phenolamine	58469-06-0	2	16181000	14950000	14787000	22827000	24419000	16848000	18299000	20287000	19760000	20352000	15512000	19725000	24762000	21353000	19518000	21334000	15428000	17431000	18132000	18199000	18401000	21919000	18301000	19391000	19277000	18580000	--	--
MWSmce455	181.05	107.01	182.058	C9H10O4	[M-H]-	Vanillic acid methyl ester	Phenolic acids	Phenolic acids	3943-74-6	3	19870	24308	22689	9619.9	12152	16111	17404	27306	12580	26709	19272	25702	25740	25125	21604	22521	15381	23984	35059	34991	32109	31152	39426	31619	33379	35544	--	--
pme2596	184.06	148	183.053	C8H9NO4	[M+H]+	4-Pyridoxic acid	Others	Vitamin	82-82-6	1	674140	532160	554920	654420	712460	668890	619870	712910	757060	435160	536960	474180	530750	588350	580060	394640	479610	526480	501160	489940	505410	532920	515490	519640	530050	512430	C00847	ko00750,ko01100
pmb1754	184	125	184.073	C5H15NO4P+	[M]+	O-Phosphocholine	Alkaloids	Alkaloids	107-73-3	3	909390	931490	1226700	146740	83880	105690	1427000	1471000	1420200	1280000	900030	698700	174680	186730	328180	1818100	1235000	1636800	885480	802990	815590	851890	971160	877070	879470	932770	C00588	ko00564,ko01100
Zmgn000447	184.98	78.96	185.993	C3H7O7P	[M-H]-	3-Phospho-D-glyceric acid	Others	Saccharides and Alcohols	820-11-1	3	512410	232530	200130	22306	15878	19810	639550	486870	345120	1705900	1397300	684650	14363	23889	49190	2390300	3198100	3334400	486350	523950	533210	607800	608400	531520	622380	483300	C00197	ko00010,ko00030,ko00260,ko00270,ko00561,ko00630,ko00710,ko01100,ko01110,ko01200,ko01230
mws0752	185.15	185.16	186.162	C11H22O2	[M-H]-	Undecylic Acid	Lipids	Free fatty acids	112-37-8	1	417940	350060	431110	374080	381320	376330	384280	400920	351050	463740	382180	444750	389930	411900	458490	524740	469910	453490	375360	407760	405980	432580	457020	437510	362540	398830	C17715	--
Hmgp002327	188.07	118.06	187.063	C11H9O2N	[M+H]+	3-amino-2-naphthoic acid	Alkaloids	Alkaloids	-	1	6574400	6622300	7626400	20523000	22793000	12572000	10162000	10170000	9291500	12424000	7400100	16926000	26834000	17375000	17054000	12811000	7137100	8097600	14077000	12579000	13425000	13724000	13713000	14517000	14079000	14520000	--	--
Hmmp001310	188.07	118.07	187.063	C11H9NO2	[M+H]+	3-Indoleacrylic acid	Alkaloids	Plumerane	1204-06-4	3	6656900	5782000	7429500	21211000	21977000	11792000	9762600	9249400	8888700	11012000	7073200	17332000	25923000	16048000	17416000	11914000	6658300	7545900	13327000	12294000	12779000	11871000	13088000	13276000	13766000	13367000	C21283	--
pmn001492	187.1	123.1	188.041	C11H8O3	[M-H]-	Ayapin	Lignans and Coumarins	Coumarins	494-56-4	2	165200	160810	201170	113760	130930	97426	199520	243100	275000	175210	160050	163250	155810	116560	119520	242660	168650	186920	216830	205670	222140	228370	241280	227450	244890	240260	C18078	--
pme0137	187.07	125	188.08	C7H12N2O4	[M-H]-	N-Acetyl-L-Glutamine	Amino acids and derivatives	Amino acids and derivatives	2490-97-3	2	9514.4	20656	4154.2	18719	19206	12208	13040	5046.2	13478	6712.1	3858.8	8874.1	27704	20453	15203	8540.2	16472	9267.5	29656	28544	23268	20570	18564	26432	23693	13224	--	--
mws0237	187.1	125	188.105	C9H16O4	[M-H]-	Azelaic acid	Organic acids	Organic acids	123-99-9	1	2944600	3372500	3537400	1955500	2094200	1960900	3564900	4156100	4757100	3054700	2837600	2852700	2537100	2061800	2488800	4049700	3168600	3161900	4054100	4073300	4029500	4247900	4033700	4348400	4364400	4383000	C08261	--
pme0122	189.12	126	188.116	C8H16N2O3	[M+H]+	N6-Acetyl-L-lysine	Amino acids and derivatives	Amino acids and derivatives	692-04-6	1	23149	15136	18499	29916	48895	42786	20087	16379	33040	46509	44282	73661	78927	73400	20871	30691	26095	33527	53431	70759	67879	85273	47488	59309	72921	71174	C02727	ko00310,ko01100
mws5041	189.12	86.1	188.116	C8H16N2O3	[M+H]+	L-Glycyl-L-isoleucine*	Amino acids and derivatives	Amino acids and derivatives	19461-38-2	1	1889600	1951500	2192700	1759000	1655200	1489300	2235400	2468100	2517500	1237900	1156300	1157400	1113500	1046000	1142100	1685000	1232400	1415500	1610900	1609200	1676900	1689400	1786900	1855000	1795400	1854200	--	--
mws0736	189.12	86	188.116	C8H16N2O3	[M+H]+	N-Glycyl-L-leucine*	Amino acids and derivatives	Amino acids and derivatives	869-19-2	1	2462000	2610100	3072400	2436500	2104000	2008500	3030300	3364200	3264900	1574500	1540400	1507000	1487500	1392900	1556400	2221900	1660200	1861400	2124000	2213500	2152600	2224600	2395600	2501100	2473200	2505200	C02155	--
Zmjp000182	189.13	70.07	188.127	C7H16N4O2	[M+H]+	N-Monomethyl-L-arginine	Amino acids and derivatives	Amino acids and derivatives	17035-90-4	2	283020	324390	367760	871620	1036600	443090	470580	446340	340570	582110	576710	942680	1058800	1019800	1846600	489150	397120	527070	608410	582950	598580	612490	612310	694300	690310	622420	C03884	--
pme3388	189.13	144	188.127	C7H16N4O2	[M+H]+	Homoarginine	Amino acids and derivatives	Amino acids and derivatives	156-86-5	3	20249	17415	21659	12505	19867	13596	21916	28833	20244	12840	30444	20765	1908.2	5241.3	22788	20478	16406	14310	6889.1	16878	16677	15962	10255	14978	2375.7	7116.2	C01924	--
pmf0348	187.13	97	188.141	C10H20O3	[M-H]-	2,6-Dimethyl-7-octene-2,3,6-triol	Others	Saccharides and Alcohols	73815-21-1	3	258220	251960	296070	161330	166680	163980	284820	368370	380390	244900	227760	195910	198460	165140	195140	321070	251070	275290	355380	342390	320930	319910	308310	377660	343430	360800	--	--
MWSslk080	187.13	141.13	188.141	C10H20O3	[M-H]-	10-Hydroxydecanoic acid	Lipids	Free fatty acids	1679-53-4	3	27183	38861	43832	5625.7	3220.1	4341.1	41455	34711	25336	28896	13037	12620	931.33	372.41	1299.7	29952	34022	28519	25689	26466	21635	24384	26305	26271	29763	21305	C02774	--
Zmzp000145	189.16	84.08	188.152	C9H20N2O2	[M+H]+	Trimethyllysine	Amino acids and derivatives	Amino acids and derivatives	23284-33-5	3	1305300	1388700	1453800	995480	1121900	1087300	1471700	769650	1587100	824170	1124200	946680	722650	1002500	936800	1187900	1126100	1173600	669520	1195900	738970	1034900	1202200	1236300	1035700	1089900	C03793	ko00310,ko01100
Zmtn001624	188.04	144.05	189.043	C10H7NO3	[M-H]-	N-Acetylisatin	Alkaloids	Plumerane	574-17-4	2	5305000	4799200	5980200	4825500	4342700	4473100	4755300	6236300	7032700	3440500	3400700	3674300	4679500	4686500	5451600	2798900	3499900	2692400	3980000	4033000	3942500	4763600	4059900	4298500	3973400	4102200	C02172	ko00380
pme0075	188.06	128	189.064	C7H11NO5	[M-H]-	N-Acetyl-L-glutamic acid	Amino acids and derivatives	Amino acids and derivatives	1188-37-0	1	1511500	1459100	1181500	655580	603230	643870	1270700	1619500	1241200	1151700	943940	839110	640060	573480	611000	1426100	1653700	1169600	654480	798940	861760	942830	813310	728390	829310	681660	C00624	ko00220,ko01100,ko01110,ko01210,ko01230
pme2244	190.09	118.07	189.07	C11H11NO2	[M+H]+	3-Indolepropionic acid	Alkaloids	Plumerane	830-96-6	1	211370	203370	209500	68539	54804	61927	215890	228700	201060	131740	143560	107420	45751	44801	53907	185980	154130	126990	89439	72587	100170	102100	90789	102330	93983	88028	--	--
mws0193	190.12	127	189.111	C7H15N3O3	[M+H]+	L-Homocitrulline	Amino acids and derivatives	Amino acids and derivatives	1190-49-4	3	19148	13239	11978	13013	27771	12410	15260	18054	11728	16575	17630	21824	13419	14656	7713.1	10765	6824.2	19363	11069	18449	18816	15612	28859	15942	18436	24754	C02427	--
pme0278	191.1	128	190.095	C7H14N2O4	[M+H]+	2,6-Diaminooimelic acid	Organic acids	Organic acids	583-93-7	3	135060	101300	190790	170420	135350	69033	99540	91369	155380	230120	347460	327210	236950	98991	112000	240030	167480	206160	142120	175470	187940	227900	209580	198040	197770	182390	C00666	ko00300,ko01100,ko01110,ko01230
mws0597	190.05	146	191.058	C10H9NO3	[M-H]-	5-Hydroxyindole-3-acetic acid	Alkaloids	Plumerane	54-16-0	1	58950	40930	43920	37131	38995	38777	31394	81070	52903	29057	33275	41804	40869	42726	26394	44797	31401	33918	31234	39704	39372	47061	31462	42775	35626	22861	C05635	ko00380,ko01100
MWSslk140	192.07	56.05	191.062	C7H13NO3S	[M+H]+	N-Acetyl-L-Methionine	Amino acids and derivatives	Amino acids and derivatives	65-82-7	3	77516	67666	70254	75834	66031	57602	80494	103440	86876	61383	69073	91220	60199	51225	30170	94432	70806	74565	62346	54794	58919	62386	75889	70288	73777	64338	C02712	--
Zmyn000453	191.02	111.01	192.027	C6H8O7	[M-H]-	Isocitric Acid	Organic acids	Organic acids	320-77-4	1	6219400	6548400	5760700	9383100	8682800	9010600	6268900	7420600	6369700	5831700	5204600	4517000	7692800	9349000	10053000	6033300	8164900	5362700	12433000	13324000	13720000	14017000	13725000	14236000	14309000	11783000	C00311	ko00020,ko00630,ko01100,ko01110,ko01200,ko01210,ko01230
mws0281	191.02	111.01	192.027	C6H8O7	[M-H]-	Citric Acid	Organic acids	Organic acids	77-92-9	1	3646900	2716400	2944200	5983200	4940700	5644300	3682300	3446800	3988700	2859900	3276800	2503900	4796100	6026000	5970700	4313400	4756000	3594200	6560400	7456200	8347000	7485600	7456400	7090800	7616500	6956300	C00158	ko00020,ko00250,ko00630,ko01100,ko01110,ko01200,ko01210,ko01230
pme2993	193.05	133	192.042	C10H8O4	[M+H]+	Scopoletin (7-Hydroxy-5-methoxycoumarin)	Lignans and Coumarins	Coumarins	92-61-5	3	18428	46869	63997	98990	139030	176470	39008	65291	46030	79849	108780	219030	390210	319590	172500	53832	19495	58689	89230	76931	78140	92980	91012	117090	106420	116780	C01752	ko00940,ko01110
Cmpp003619	193.05	105.07	192.042	C10H8O4	[M+H]+	6,7-Dihydroxy-4-methylcoumarin	Lignans and Coumarins	Coumarins	529-84-0	3	148950	134510	169280	207220	222870	289620	189210	161010	171180	105820	145510	113250	123980	157990	294880	119510	98214	69915	86197	101700	96552	124060	129920	135860	99275	137170	--	--
mws0277	191.06	85	192.063	C7H12O6	[M-H]-	Quinic Acid	Organic acids	Organic acids	77-95-2	2	1662100	1871600	1762300	2288600	2343400	2801400	1427100	1768800	1671500	1389400	1540000	1078000	2359000	2845600	2574800	1677100	2188600	1580400	3630200	4158600	3880500	3958800	3999100	3966200	4074700	3373500	C00296	ko00400,ko01100
MWS0686	194.04	121.03	193.038	C9H7NO4	[M+H]+	5,6-Dihydroxy-1H-indole-2-carboxylic acid	Alkaloids	Plumerane	4790-08-3	3	5358.6	496.96	2458.5	18274	17551	29804	6572.4	4267.3	2245.3	5180.6	4981.7	7483.3	16725	16222	5174.7	13005	12136	9754.2	8467.4	11862	8255.1	7725.4	12293	9655.1	11817	8734.8	C04185	ko00350,ko01100
pme2743	194.08	91	193.074	C10H11NO3	[M+H]+	N-Phenylacetylglycine	Amino acids and derivatives	Amino acids and derivatives	500-98-1	3	313710	213840	193020	923340	954170	541240	129760	157020	163730	86680	136850	152120	214610	195770	110160	54036	98132	56100	181260	168620	179140	233030	179570	198930	173120	182500	C05598	ko00360
mws1189	193.04	72.8	194.033	C6H10O7	[M-H]-	D-Galacturonic acid*	Organic acids	Organic acids	685-73-4	3	34269	30795	28054	41299	31412	31337	17290	25228	35227	30286	50675	34820	146630	60519	95816	34099	39677	44287	54394	38910	38780	42532	57690	64583	60522	47415	C00333	ko00040,ko00053,ko00520,ko01100,ko02010
pme3705	193.04	73	194.043	C6H10O7	[M-H]-	D-Glucoronic acid*	Others	Saccharides and Alcohols	6556-12-3	3	42190	37740	19428	36055	41525	49906	31525	23289	34556	53764	36329	36061	111970	95033	87166	33381	57730	47199	65285	54570	46743	61216	68319	62228	72650	52865	C00191	ko00040,ko00053,ko00520,ko00562,ko01100
MWSslk097	195.06	163.04	194.058	C10H10O4	[M+H]+	Dimethyl phthalate	Phenolic acids	Phenolic acids	131-11-3	3	67064	61716	68770	59457	56766	62244	61821	68800	67139	57630	68339	56707	65898	72595	60412	64458	48168	70512	46657	50435	49605	54491	57775	52185	52219	51992	C11233	--
MWSmce632	195.06	93.03	194.058	C10H10O4	[M+H]+	Vanillin acetate	Phenolic acids	Phenolic acids	881-68-5	2	609480	578430	696070	137410	147830	170870	758930	807030	764310	521500	465810	493860	294410	220800	284700	703130	664960	654260	512740	577390	603170	618300	674190	618180	646680	624250	--	--
Lmdn003756	193.05	135.05	194.058	C10H10O4	[M-H]-	Methyl caffeate	Phenolic acids	Phenolic acids	3843-74-1	3	3238.8	8595	11852	4711.2	6912.7	9788.3	12518	13220	22765	19292	18245	14362	11938	14603	26713	22412	12687	16045	13603	7099.6	12227	12380	8052.4	5782.3	12283	6241.6	C10477	--
pme0422	193.06	134	194.058	C10H10O4	[M-H]-	Isoferulic Acid*	Phenolic acids	Phenolic acids	537-73-5	1	1052100	654430	921690	127150	177750	203550	1008900	1058000	642830	1133700	1194900	1134000	1335200	925920	932770	2032600	1226800	1382300	1046300	1105600	1107200	1117900	1072800	1151000	1123900	1123600	C10470	--
mws0014	193.05	134.01	194.058	C10H10O4	[M-H]-	Ferulic acid*	Phenolic acids	Phenolic acids	537-98-4	1	17735000	14241000	15720000	2314800	3595800	4023200	16337000	17046000	12268000	20167000	18640000	20603000	22156000	16501000	17197000	27940000	22361000	23577000	17824000	17750000	19393000	19363000	21787000	18749000	18650000	17916000	C01494	ko00940,ko01100,ko01110
MWS1771	196.1	91.05	195.09	C10H13NO3	[M+H]+	L-Tyrosine methyl ester	Amino acids and derivatives	Amino acids and derivatives	1080-06-4	3	236230	239830	249450	260710	259310	254400	264050	305880	284260	254550	251390	269080	182040	191860	163510	285460	252770	242490	216950	199310	194830	209920	196320	211370	233350	224970	C03404	--
pme0534	195.05	74.9	196.058	C6H12O7	[M-H]-	Gluconic acid	Others	Saccharides and Alcohols	526-95-4	1	414780	473050	412200	514860	558860	421730	620350	541960	567200	334210	425550	379380	622230	572470	684680	467450	475080	352030	1087300	1317100	1078000	1115700	1211600	1204700	1329100	1181800	C00257	ko00030,ko01100,ko01110,ko01200
HJAP052	197.08	138.07	196.074	C10H12O4	[M+H]+	2,4,5-Trimethoxybenzaldehyde	Phenolic acids	Phenolic acids	4460-86-0	3	5865.6	2190.4	6232.8	2538.1	3800	2654.3	1997.7	4699.6	1213.1	3319.6	5086.1	3244.9	4686.5	4317.5	7734.7	4351	7608.5	6759	4637.8	4520.7	2861.1	4447.5	6438.5	5538.4	3321	4984.7	--	--
MWS20182	195.07	136.05	196.074	C10H12O4	[M-H]-	Dihydroferulic Acid	Phenolic acids	Phenolic acids	1135-23-5	2	71758	63090	79834	11294	10280	14047	79460	96048	49859	73695	87769	96328	97474	78482	65927	130450	91644	107970	73825	69338	84042	81944	84448	77937	68430	81236	--	--
MWSslk006	197.08	65.04	196.074	C10H12O4	[M+H]+	Ethyl Vanillate	Phenolic acids	Phenolic acids	617-05-0	3	27858	26681	39784	11336	10776	11451	43252	28890	32497	71491	52697	49683	10044	11182	6777.9	81256	57831	58389	34332	32461	32349	31407	33308	31231	34444	33719	--	--
mws0612	195.07	121	196.074	C10H12O4	[M-H]-	3,4-Dimethoxyphenyl acetic acid	Phenolic acids	Phenolic acids	93-40-3	3	16928	29710	22103	42474	35145	38187	17354	18526	29844	7853.8	9268	13095	3962.5	13682	6434.2	9439.5	3653.2	9953.2	6034.2	11519	10195	15255	15905	16412	7766.2	11663	--	--
Lmlp002205	197.12	161.1	196.109	C11H16O3	[M+H]+	Isololiolide	Terpenoids	Terpene	38274-00-9	3	131210	131130	135470	128800	130450	127310	127380	134310	180630	157390	119420	86976	127990	116460	113240	143560	81730	111260	129890	99858	122320	121540	119820	111540	119760	111460	--	--
pme3827	198.08	152.2	197.069	C9H11NO4	[M+H]+	3,4-Dihydroxy-L-phenylalanine (L-Dopa)	Amino acids and derivatives	Amino acids and derivatives	59-92-7	1	31582	23638	10955	221030	288220	133940	17284	4978.1	16385	41286	39278	93055	620300	521320	300540	21657	34147	22414	51229	60867	106360	75150	60520	67469	70546	59678	C00355	ko00350,ko00950,ko00965,ko01100,ko01110
mws0027	197.05	123	198.053	C9H10O5	[M-H]-	Syringic acid	Phenolic acids	Phenolic acids	530-57-4	3	5646.2	6179.8	8600.2	11416	13771	21900	12669	7766	2275	13704	5400.5	4727	14593	11197	14141	6378.2	8243.2	13350	17905	22649	17340	15490	8957.2	20899	16368	22275	C10833	--
pmb2497	197	153	198.053	C9H10O5	[M-H]-	4-Hydroxy-3-methoxymandelate	Phenolic acids	Phenolic acids	55-10-7	3	286580	294640	313270	130720	139090	141670	271890	343840	403130	211720	240320	193780	57575	117880	95868	307230	364610	368840	318460	372590	232150	275250	285520	326700	268630	314660	C05584	ko00350,ko01100
Zmzn000079	199	78.96	200.009	C4H9O7P	[M-H]-	D-Erythrose-4-phosphate	Others	Saccharides and Alcohols	585-18-2	3	95303	76122	92665	20261	23398	18250	106160	118060	118660	75913	77167	55369	14195	17067	25994	144680	167150	151800	143740	142460	113300	131660	128920	122610	119650	101640	C00279	ko00030,ko00400,ko00710,ko00750,ko00998,ko01100,ko01110,ko01200,ko01230
pmb2640	199.17	199.17	200.178	C12H24O2	[M-H]-	Dodecanoic acid (Lauric acid)	Lipids	Free fatty acids	143-07-7	1	211400	162000	192390	149660	149440	149700	275320	273550	239030	461450	426690	363430	236220	214240	254180	384470	454040	442660	232240	229850	209320	244820	217870	247610	245400	239080	C02679	ko00061,ko01100,ko01110
pmb0130	203.12	144	202.111	C12H14N2O	[M+H]+	Acetryptine	Alkaloids	Plumerane	3551-18-6	3	13200	20307	18351	348670	66929	38352	28610	22255	16067	17674	19699	66752	40334	26228	13971	13530	5940.4	14438	349680	381250	411040	401800	396200	394620	382330	387390	--	--
pme0266	201.11	139	202.121	C10H18O4	[M-H]-	Sebacate	Organic acids	Organic acids	111-20-6	1	2053	3693.9	1678.6	24604	39607	17087	31845	29039	23920	63491	37803	38165	1909.8	1536.3	2591.7	30880	30715	47568	12227	10055	10057	10768	11375	11042	9308.1	12855	C08277	--
mws5037	203.14	86.1	202.132	C9H18N2O3	[M+H]+	L-Alanyl-L-leucine	Amino acids and derivatives	Amino acids and derivatives	3303-34-2	3	40246	30751	54315	39722	33267	37551	44993	37637	41740	52717	48698	22566	38231	46853	82497	46801	46018	79083	52243	62756	57509	50942	56644	70172	74662	48820	--	--
MWS1844	203.14	129.07	202.136	C14H18O	[M+H]+	2-Pentyl-3-phenyl-2-propenal	Others	Others	122-40-7	3	9584.7	10546	8823.2	11454	8674.3	10018	10904	8758.9	6307.8	8756.7	8222.3	7519	15339	12484	7338.2	8065.7	7960.1	11218	5276.6	6176.2	6041.9	5226.4	7545.1	4227.5	7161.6	4890.6	C12288	--
NK10251888	203.15	70.07	202.143	C8H18N4O2	[M+H]+	NG,NG-Dimethyl-L-arginine	Amino acids and derivatives	Amino acids and derivatives	30315-93-6	1	367080	377700	447510	422190	429190	335070	425660	492100	468950	465630	420830	473160	423940	503960	794700	424540	351740	451690	520110	531390	546460	556270	553890	560550	599800	562140	C03626	--
MWS5164	203.15	70.07	202.143	C8H18N4O2	[M+H]+	N,N'-Dimethylarginine;SDMA	Amino acids and derivatives	Amino acids and derivatives	30344-00-4	1	272600	293060	342120	338980	334400	289530	372720	397910	398000	350250	342780	384610	322750	361490	652270	383060	281710	378220	434030	383190	410180	386470	464500	504560	509850	493040	--	--
mws0018	203.22	83	202.216	C10H26N4	[M+H]+	Spermine	Alkaloids	Alkaloids	71-44-3	3	2798600	2229600	2372500	2681500	2993000	2732500	2557400	2386800	3261500	2498400	3254700	2298100	714080	2277700	2691800	3428000	3683300	2921600	4546000	4080400	4110600	4353500	5025800	4889200	5372200	5710900	C00750	ko00330,ko00410,ko00480,ko00770,ko01100
mws0282	203.08	116.05	204.09	C11H12N2O2	[M-H]-	L-Tryptophan	Amino acids and derivatives	Amino acids and derivatives	73-22-3	1	5599400	5286800	6212200	14465000	16492000	8863400	7333100	7184100	6313200	8731100	5743000	11889000	17386000	11991000	12341000	9167000	5242200	6441200	9797400	10192000	10221000	8961100	9077000	9733800	9662100	9616800	C00078	ko00260,ko00380,ko00400,ko00901,ko00966,ko00970,ko00998,ko01100,ko01110,ko01210,ko01230
Zmbp002538	205.1	146.06	204.09	C11H12N2O2	[M+H]+	1-Methoxy-indole-3-acetamide	Alkaloids	Plumerane	-	1	16675000	16172000	18156000	49173000	50708000	30095000	23728000	23865000	22841000	29616000	19281000	40719000	55987000	41045000	41363000	29973000	19185000	21273000	31420000	32208000	33689000	31370000	34731000	35063000	34049000	34767000	--	--
pmb0818	206.1	147.5	205.074	C11H11NO3	[M+H]+	Methoxyindoleacetic acid	Alkaloids	Plumerane	3471-31-6	3	172910	192770	222070	638730	780210	399860	271780	292830	273810	389110	233730	468190	812970	505950	512990	364200	193780	249180	384900	369670	372050	332130	377310	408570	422090	444620	C05660	ko00380
Lmyp003025	206.08	146.06	205.074	C11H11NO3	[M+H]+	Coixlactam	Alkaloids	Quinoline alkaloids	-	2	32698	20454	12961	50808	47504	55204	25268	41208	17412	31307	48208	32292	112510	66370	81911	30228	32041	56736	51748	38523	51829	36860	56350	64856	73159	42521	--	--
MWS0618	204.12	71.05	205.131	C9H19NO4	[M-H]-	Pantothenol	Others	Saccharides and Alcohols	16485-10-2	3	64520	62853	62321	54923	55958	58703	59303	61728	69433	75469	86743	65753	50791	64459	81748	99055	105700	100100	60482	57053	69924	70637	77190	58311	70561	58937	C05944	ko00770
pmp001236	207.07	121.1	206.058	C11H10O4	[M+H]+	Clove chromone	Others	Others	-	2	10387	9121.4	7651.5	8974.3	1888.1	5500.6	11845	9816.8	11139	16326	23476	18733	11967	15742	30956	18898	22313	15928	10874	8876.2	13061	9176.7	10721	14047	19468	12275	--	--
MWSmce577	207.1	161.06	206.094	C12H14O3	[M+H]+	Ethyl p-methoxycinnamate	Phenolic acids	Phenolic acids	24393-56-4	3	55713	44375	49336	41856	30628	26868	42409	49101	43827	65546	50696	44245	44503	51692	70266	80868	50135	59830	46612	48194	51962	50491	49002	52405	58469	50102	--	--
pmb1587	207.14	165.2	206.131	C13H18O2	[M+H]+	4-Hydroxy-3,5-diisopropylbenzaldehyde	Phenolic acids	Phenolic acids	10537-86-7	3	30837	31952	27016	30705	31224	31608	44003	38796	41947	40701	30625	33475	28036	26342	21022	38166	34965	38645	26284	27161	29295	28807	26351	27352	30704	29254	--	--
Lmbn013410	205.16	189.13	206.167	C14H22O	[M-H]-	2,4-Di-Tert-Butylphenol	Phenolic acids	Phenolic acids	96-76-4	1	171580	145910	163670	177650	185640	144670	163290	193790	140520	158800	186210	210180	254670	172510	225760	187110	169570	149990	125660	119150	106710	132860	152090	121230	117250	131410	--	--
Zmgn002106	206.08	58.03	207.09	C11H13NO3	[M-H]-	N-Acetyl-L-phenylalanine	Amino acids and derivatives	Amino acids and derivatives	2018-61-3	2	80204	104860	119790	287680	282230	305350	84487	86646	129270	108550	85282	123080	285460	335880	160670	96345	78107	85767	516150	631660	633700	581330	582740	543270	595700	600240	C03519	ko00360,ko01100
MA10107783	207.03	119.05	208.037	C10H8O5	[M-H]-	3-[(1-Carboxyvinyl)oxy]benzoic acid	Phenolic acids	Phenolic acids	16929-37-6	2	14513	12246	22896	61127	62664	75138	24727	21558	29424	209230	171940	211250	185990	195540	225630	173980	154350	203570	95719	94819	108810	90048	111150	107460	114200	90473	C20772	ko00130,ko01110
mws1014	209.04	149.1	208.037	C10H8O5	[M+H]+	Fraxetin (7,8-Dihydroxy-6-methoxycoumarin)	Lignans and Coumarins	Coumarins	574-84-5	3	49638	42960	34282	101290	88306	188280	108550	30371	25089	96176	155250	177500	152260	88240	192740	97773	164400	175640	166650	156280	77404	191420	108120	176710	122440	90655	C09265	--
pmb2620	207.07	133.1	208.074	C11H12O4	[M-H]-	3,4-Dimethoxycinnamic acid	Phenolic acids	Phenolic acids	14737-89-4	1	527900	704990	556610	663650	744820	602930	1213100	737350	558750	1867500	1518900	2154600	1081900	1164800	1066500	3257000	3183400	2427800	1745200	1811100	1941200	2051900	1998800	2200400	2176500	2079700	--	--
pme3443	207.07	192	208.074	C11H12O4	[M-H]-	Sinapinaldehyde	Phenolic acids	Phenolic acids	4206-58-0	1	12209	11404	16215	10867	13641	15057	10406	6156.6	12387	8486.5	10116	17795	7924.7	41149	57799	8184.4	6920.9	4520.1	674360	606370	697100	658570	665370	743230	643420	592500	C05610	ko00940,ko01100,ko01110
mws2184	207.07	135.1	208.074	C11H12O4	[M-H]-	Ethyl caffeate	Phenolic acids	Phenolic acids	102-37-4	3	6805.2	8903.1	13599	10647	3188.3	12464	8940.2	5369.4	9224.6	7775.2	4993.8	3801.8	7561.5	10731	9032.4	9133.3	7426.3	5737.5	7364.8	8402	7297.9	9039.6	9762.9	8555.3	6745.3	9665.9	--	--
MWSmce083	207.07	133.03	208.074	C11H12O4	[M-H]-	Ferulic acid methyl ester	Phenolic acids	Phenolic acids	2309-07-1	1	1137100	1561600	1252500	1471800	1531100	1283000	2709500	1562300	1278900	4046500	3494200	4546400	2302900	2631900	2278600	7064400	7168400	5448500	3810000	4193400	4194800	4437500	4444000	4611000	4650400	4645000	--	--
Lmsn000954	207.09	59.01	208.095	C8H16O6	[M-H]-	Dambonitol	Others	Saccharides and Alcohols	523-94-4	3	26413	18843	22960	32275	22982	33542	19798	35091	29297	41919	33305	35987	21283	34096	38798	50649	51976	27779	10311	30622	26402	32326	29504	26040	41305	19837	--	--
Zmyn000108	209.03	85.03	210.038	C6H10O8	[M-H]-	D-Saccharic acid*	Others	Saccharides and Alcohols	87-73-0	1	610340	583280	632700	840330	766460	726560	602370	589450	643720	712350	663810	729560	894560	712630	717960	800240	636700	675080	934880	927130	956810	842720	802100	1024800	977660	924790	C00818	ko00053,ko01100
Zmpn000199	209.03	85.03	210.038	C6H10O8	[M-H]-	D-Galactaric acid*	Others	Saccharides and Alcohols	526-99-8	1	718240	591670	577350	1051100	924920	778260	708420	647160	733250	712600	638750	711280	997540	791120	792840	855710	661730	803580	891880	1012300	894180	881180	1013000	897390	760960	1076300	C00879	ko00053,ko01100
Hmcn000192	209.07	59.01	210.073	C7H14O7	[M-H]-	Sedoheptulose	Others	Saccharides and Alcohols	3019-74-7	1	218270	234400	203790	350920	275570	388710	286680	208140	215120	367860	354240	345880	405830	388240	433600	336860	290210	359290	354030	345610	362320	377350	355770	339230	395340	415280	C02076	ko00710,ko01100
mws0853	209.08	179	210.089	C11H14O4	[M-H]-	Sinapyl alcohol	Phenolic acids	Phenolic acids	537-33-7	3	2867.8	2817.2	5698.2	9225.2	8530.8	2271	4012	3962	1714.5	2832	2258	4013.5	2870.8	1236.5	2269.2	2270	2870.8	2299	17132	13129	19918	22218	17841	19320	22921	15213	C02325	ko00940,ko01100,ko01110
Lmbn004790	209.08	179.03	210.089	C11H14O4	[M-H]-	Methyl 3-(3-hydroxy-4-methoxyphenyl)propanoate	Phenolic acids	Phenolic acids	129150-61-4	3	1135.5	3956.8	2319.2	6883.5	6304	7408.2	2280	1765.2	2286	3946.2	564.5	6759	605	2812.8	2269.5	3956	571.25	1135	8006	14764	15057	6877	10751	9016	6792	13272	--	--
MWStz261	211.14	70.07	210.137	C11H18N2O2	[M+H]+	Cyclo(D-Leu-L-Pro)	Amino acids and derivatives	Amino acids and derivatives	36238-67-2	3	19868	17516	14417	15479	6603.2	5987.8	21338	11995	13715	8311.5	12582	10614	3026.5	11904	9524	20248	10133	11210	11324	13675	21362	15572	12510	23167	20785	8952.5	--	--
Hmlp008487	211.17	81.07	210.161	C13H22O2	[M+H]+	Blumenol C	Terpenoids	Terpene	36151-02-7	3	55701	61987	46642	54902	47089	59280	63566	61094	55698	50226	72938	72261	40062	47727	60644	59272	56497	54960	51680	58353	71057	56594	67646	56027	41830	72122	--	--
pme1675	210.03	78.9	211.036	C4H10N3O5P	[M-H]-	Creatine Phosphate	Organic acids	Organic acids	67-07-2	3	18074	11651	12003	1886.3	3238.6	1563.2	6242.4	5065.9	7749.9	6870.1	14142	8571.9	2059.3	2254.6	4260.4	14605	17617	20941	4295.9	9049.9	9977.6	14548	10257	7580.9	5142.3	8500.6	C02305	ko00330,ko01100
mws0863	213.02	97	214.024	C5H11O7P	[M-H]-	2-Deoxyribose-5'-phosphate	Nucleotides and derivatives	Nucleotides and derivatives	102916-66-5	3	11989	12417	14555	26973	9145.8	8462.4	20973	20271	18320	10262	17931	12514	10877	17405	5668.1	25056	38525	30004	38536	23271	27894	25562	25281	32766	39499	30313	C00673	ko00030,ko01100
pmb2507	213.1	97	214.024	C5H11O7P	[M-H]-	2-Deoxyribose-1-phosphate	Nucleotides and derivatives	Nucleotides and derivatives	17210-42-3	3	155620	116480	134610	132700	162350	103040	168510	207190	286810	125600	200750	162030	227500	154540	205740	483630	752870	363320	360670	302830	423560	367700	293260	243060	493570	300820	C00672	ko00030,ko00240,ko01100
mws0751	213.19	195	214.193	C13H26O2	[M-H]-	Tridecanoic Acid	Lipids	Free fatty acids	638-53-9	1	3028.2	781.83	2703.1	985.94	1443.1	336.73	1756.3	686.28	1091.2	1698.1	1495.7	1030.8	2067.4	2123.5	1591.9	2310.1	3303.4	1645.1	2237	1894.9	1373.7	2465.6	2428.6	2133.9	2153.6	2706.2	C17076	--
pmb2873	214.1	134	215.095	C13H13NO2	[M-H]-	3-(2-Naphthyl)-L-alanine	Amino acids and derivatives	Amino acids and derivatives	58438-03-2	3	49774	64968	68605	33134	41591	26353	44580	49454	64114	45758	51812	34676	63898	73666	77728	27080	60865	39570	165950	191830	196520	174370	200710	194890	160390	185530	--	--
pme0170	217.13	158	216.122	C8H16N4O3	[M+H]+	N-Acetyl-L-Arginine	Amino acids and derivatives	Amino acids and derivatives	155-84-0	3	22098	27718	27809	38480	46169	34260	20069	23495	39380	19902	25124	39116	61476	54350	67605	33110	25266	30054	29521	24139	31386	35738	31988	44655	37519	35088	--	--
MWS1900	215.13	153.13	216.136	C11H20O4	[M-H]-	Undecanedioic acid	Lipids	Free fatty acids	1852-04-6	1	54937	55175	63302	54616	47344	54269	73236	54833	61596	95840	77633	65678	57159	41324	42861	102480	81795	85657	85647	83465	87387	87781	92625	90941	94571	94864	--	--
mws5045	215.17	169.16	216.173	C12H24O3	[M-H]-	12-Hydroxydodecanoic acid	Lipids	Free fatty acids	505-95-3	1	4331.3	3847.1	6975	2086.8	1687	5460.1	8489.9	3662.3	3191.3	13861	6968.8	5649.4	1470	1039	3676.7	16874	8132	11311	6891.6	7476.2	6348.7	7178.9	6447.4	7207.3	6874.6	6570.6	C08317	--
mws0677	219.11	160	218.106	C12H14N2O2	[M+H]+	N-Acetyl-5-hydroxytryptamine	Alkaloids	Plumerane	1210-83-9	3	361290	382780	371430	448020	475960	420700	426280	472130	377560	294600	312170	359970	292620	284640	232270	355090	319490	326030	240830	228760	273440	241200	274390	227990	223180	324970	C00978	ko00380,ko01100
mws1337	220.12	202.1	219.111	C9H17NO5	[M+H]+	D-Pantothenic Acid	Others	Vitamin	79-83-4	1	6270600	5879000	7034500	8736900	8428000	6777200	6143200	7204900	7239000	5045900	6018700	4624000	5584700	5926300	5961100	5978300	6222800	5900200	6198000	5891400	6663600	6599100	6840500	6674500	7048600	6548800	C00864	ko00410,ko00770,ko01100,ko01110
MWS2073	218.96	160.96	219.969	C8H6Cl2O3	[M-H]-	2,4-Dichlorophenoxyacetic Acid	Organic acids	Organic acids	94-75-7	3	40453	40674	44730	45326	46183	51635	40600	47144	48928	44865	33134	51624	43861	47442	31161	30169	17859	22214	22391	19645	20693	21552	23476	19637	24134	20376	C03664	--
pme1228	221.09	204	220.085	C11H12N2O3	[M+H]+	5-Hydroxy-L-tryptophan	Amino acids and derivatives	Amino acids and derivatives	56-69-9	3	101840	103860	121630	215570	248400	189330	103450	118960	149430	159920	176530	259450	345230	323630	244160	159110	178550	148630	148850	131570	145460	137920	151270	157010	162170	151970	C00643	ko00380,ko01100
Hmyp002656	222.08	130.06	221.068	C11H11NO4	[M+H]+	Methyl dioxindole-3-acetate	Others	Others	57061-18-4	2	32544	18459	24784	14310	9157.3	31840	32469	20291	32842	53266	50227	58561	48137	50767	96371	34911	54073	54878	45736	45587	54808	42238	55998	42118	52780	45610	--	--
mws2608	222.1	84.05	221.09	C8H15NO6	[M+H]+	N-Acetyl-D-galactosamine	Others	Saccharides and Alcohols	1811-31-0	3	83045	277580	79479	71420	139000	90556	60963	327850	97294	87760	70933	61741	73662	55227	90041	93963	43386	85376	97586	79518	91346	75468	94376	95630	90778	89819	C01132	ko00052,ko01100
mws4174	222.1	138	221.09	C8H15NO6	[M+H]+	N-Acetyl-D-mannosamine	Others	Saccharides and Alcohols	7772-94-3	3	192720	585150	165410	138800	321040	170720	161280	787500	252450	143490	159050	138740	156070	110700	133490	170750	170750	148210	192380	162520	180300	177780	190530	194160	179990	174450	C00645	ko00520,ko01100
pme2755	222	144	221.09	C8H15NO6	[M+H]+	N-Acetyl-D-glucosamine	Others	Saccharides and Alcohols	7512-17-6	3	46895	38580	40659	52576	43275	48999	43236	53474	34186	49253	48244	43799	20009	39818	41745	47627	63313	46862	69589	64390	64459	77650	66188	91929	81681	88320	C00140	ko00520,ko01100,ko02010
mws1639	223.06	190	222.053	C11H10O5	[M+H]+	Isofraxidin	Lignans and Coumarins	Coumarins	486-21-5	2	7839.6	9413.9	4406.4	7349.5	8363.4	7943.5	14316	10413	8328.9	8241.2	7421	15099	8902.8	6883.1	7864.7	9325.9	7440.3	5937.7	18582	15628	16186	15380	14269	16137	24549	14788	C17480	--
MWS4296	223.11	120.08	222.1	C11H14N2O3	[M+H]+	Glycylphenylalanine	Amino acids and derivatives	Amino acids and derivatives	3321-03-7	1	1206400	1076600	1245900	830460	805360	735430	1379700	1659900	1858700	617040	604810	701520	672150	662790	635260	954990	696500	696610	827550	924610	961440	993590	914160	1089700	1077400	1037400	--	--
mws5042	223.11	120.09	222.1	C11H14N2O3	[M+H]+	L-Glycyl-L-phenylalanine	Amino acids and derivatives	Amino acids and derivatives	721-66-4	1	1151000	1067500	1317200	788450	801430	727890	1345900	1594500	1702700	670180	599850	712820	559370	664780	689630	1063500	610850	796690	887460	928230	987280	1039900	1072100	1101400	1036800	1056800	--	--
mws0520	224.09	136	223.084	C11H13NO4	[M+H]+	N-Acetyl-L-tyrosine	Amino acids and derivatives	Amino acids and derivatives	537-55-3	3	189320	278970	195180	401310	385710	485510	163620	206410	215580	249690	368890	416830	475760	451040	344640	152620	172790	132770	272020	285310	292560	287820	301860	289840	300530	289970	--	--
Zmln002252	223.03	149.03	224.032	C10H8O6	[M-H]-	Sideretin (5,7,8-Trihydroxy-6-methoxycoumarin)	Lignans and Coumarins	Coumarins	-	3	87288	87671	78346	23207	36874	34274	54910	50610	68258	55783	66132	86102	112190	78855	69928	73407	57043	73888	73408	51878	71183	82800	84998	75141	62694	64814	C22007	--
mws4085	223.06	193	224.068	C11H12O5	[M-H]-	Sinapic acid	Phenolic acids	Phenolic acids	530-59-6	2	73700	73825	94892	17004	19438	18760	70051	58065	62704	48035	46768	69562	122910	66689	55208	66446	46502	81817	83016	68068	64810	72928	63961	79130	81950	64233	C00482	ko00940,ko01100,ko01110
Cmsp002787	227.09	181.05	226.084	C11H14O5	[M+H]+	3,4'-Dihydroxy-3',5'-dimethoxypropiophenone	Phenolic acids	Phenolic acids	136196-47-9	2	73843	73986	72268	60645	54678	57440	81498	107310	107990	102380	81047	106150	66085	62810	176450	66786	109360	103320	72669	57354	50586	62953	61685	74480	82165	57292	--	--
MWStz170	227.14	86.06	226.132	C11H18N2O3	[M+H]+	Cyclo(L-Leu-trans-4-hydroxy-L-Pro)	Amino acids and derivatives	Amino acids and derivatives	115006-86-5	3	16051	14231	6908	18564	22005	33036	8981.2	14951	19456	19567	22567	17619	25006	38294	26402	7676.2	18543	16283	12744	11930	11768	11053	18089	18783	11022	25106	--	--
pmb2643	225.19	207	226.193	C14H26O2	[M-H]-	Myristoleic acid	Lipids	Free fatty acids	544-64-9	1	2308.1	2922.9	4087.3	2242.8	2429.9	2091.2	2547.2	2277.3	2568.9	5163.9	7207.1	3191.8	1857.6	1531.3	3856.7	6471.6	6875.1	8868.6	10503	10905	11564	13518	10713	9299.1	10662	11987	C08322	--
pme1194	228.1	112	227.091	C9H13N3O4	[M+H]+	2'-Deoxycytidine	Nucleotides and derivatives	Nucleotides and derivatives	951-77-9	2	125520	126260	125600	74154	60150	57262	129580	147440	170290	83499	92988	169880	68978	77711	55995	113460	101540	119830	118530	110110	113600	110510	124410	129890	120430	135700	C00881	ko00240,ko01100,ko02010
mws0119	227.2	227.2	228.209	C14H28O2	[M-H]-	Myristic Acid	Lipids	Free fatty acids	544-63-8	1	13090000	9554800	11451000	11086000	11373000	12473000	19138000	20610000	20591000	33631000	28429000	30865000	13777000	13626000	16280000	25910000	32834000	31609000	24024000	23449000	23730000	24271000	22243000	24045000	24400000	25220000	C06424	ko00061,ko01100
pma6455	229.01	96.97	230.02	C5H11O8P	[M-H]-	Ribulose-5-phosphate	Others	Saccharides and Alcohols	4300-28-1	3	74983	65549	106660	2725.8	2855	12124	106500	80742	107680	77569	92190	48248	1951.8	10158	12812	141720	67009	109440	74313	51512	39365	69323	53706	45668	49067	48016	C00117	ko00030,ko00230,ko00440,ko00710,ko00750,ko01100,ko01110,ko01200,ko01230
Cmsn005615	229.09	123.04	230.094	C14H14O3	[M-H]-	3,3',5-Trihydroxybibenzyl	Phenolic acids	Phenolic acids	86630-23-1	2	5471.5	5146.9	14180	1349.9	3179.1	4493.1	8773.6	3128.2	3388.5	10819	9213.5	5054.4	689.51	997.49	4950	10658	6347.1	10457	6693.5	5980.1	5237.3	8220.7	8067.5	5056.6	7375.6	5144.8	--	--
mws0474	229.14	211	230.152	C12H22O4	[M-H]-	Dodecanedioic aicd	Lipids	Free fatty acids	693-23-2	1	7099.4	5071.8	8256.5	5416	6046.9	6297.2	5694.9	6766.6	4508.6	10230	11054	6743.4	5135.6	2587.1	5533.4	13423	10253	13007	6019.6	5063.4	5151.8	5104.9	6243.8	5054.9	5535.3	5479.4	C02678	--
pmb0962	235.1	118.3	234.158	C10H22N2O4	[M+H]+	L-Lysine-Butanoic Acid	Amino acids and derivatives	Amino acids and derivatives	80407-71-2	3	1993000	2803100	4049400	8758500	6922400	6032100	2389100	2179500	2598300	2338000	2657900	3598600	7139400	8011900	5136200	1986400	1540600	1900200	5226000	2933600	3741400	4097400	3552400	4310800	4079100	4828600	--	--
mws4176	237.12	120.09	236.116	C12H16N2O3	[M+H]+	L-Alanyl-L-Phenylalanine	Amino acids and derivatives	Amino acids and derivatives	3061-90-3	1	903230	915310	1013700	675930	613280	607980	1093500	1180400	1142200	645900	619660	623780	573090	540230	737880	1031300	710100	884570	667210	657850	760560	726260	811700	803350	796070	840080	--	--
Jmbn003202	235.12	59.01	236.126	C10H20O6	[M-H]-	Butyl Beta-D-Fructoside	Others	Others	67884-27-9	2	73286	59907	49031	73387	58459	84055	63711	64215	71837	59245	44982	40495	38134	58733	56962	56343	35424	61596	52681	54176	37893	41330	39678	51606	50323	46905	--	--
Lmyn000160	237.06	87.01	238.069	C8H14O8	[M-H]-	Mucic acid Dimethyl Ester	Phenolic acids	Phenolic acids	-	2	155970	146490	122470	216840	208430	191990	148370	162090	211270	137210	170780	117100	307470	243870	337390	220400	273330	223490	219600	268830	220330	249920	229070	243150	234820	233540	--	--
pmn001669	237.08	147	238.084	C12H14O5	[M-H]-	Methyl sinapate	Phenolic acids	Phenolic acids	20733-94-2	3	2566.5	4596.3	3684.2	5023.1	4583.5	4749.5	8252.3	3662.2	4409.8	17670	20451	23898	9194.5	6973.7	9067	19498	25775	21336	18030	21593	18561	20266	24129	23364	25462	25368	--	--
Zmdn011161	239.07	223.03	240.079	C15H12O3	[M-H]-	Chrysophanol-9-anthrone	Quinones	Anthraquinone	491-58-7	2	93381	106050	128780	123530	113830	96093	95923	106200	99984	119290	114270	132840	142760	149550	151520	194280	128330	138290	123830	135370	116110	150510	139370	151610	147850	154970	C10314	--
MWS0552	239.2	223.03	240.209	C15H28O2	[M-H]-	Cis-10-Pentadecenoic Acid(C15: 1)	Lipids	Free fatty acids	84743-29-3	2	108350	105100	103170	118240	121540	93029	119500	119750	105010	105880	106390	115060	128200	159360	149230	113500	139220	128930	124010	146470	144490	127980	130130	132970	152060	155480	--	--
pme2827	239	223	240.245	C16H32O	[M-H]-	Palmitaldehyde	Lipids	Free fatty acids	629-80-1	3	7683200	7355400	6751100	5814000	6521900	6691100	8602200	9014300	6934400	6997500	7787300	7769800	6497900	5806700	6051900	7836200	8122800	8002800	3052000	3263000	3710300	3763600	3920300	4034300	4119500	3852300	C00517	ko00071
MWS2910	242.11	126.07	241.106	C10H15N3O4	[M+H]+	5-Methyl-2'-Deoxycytidine	Nucleotides and derivatives	Nucleotides and derivatives	838-07-3	3	9311.6	8739.1	4844.4	5520.4	3132.8	7099	6581.9	7853.1	10464	9031.9	6402.4	3002.6	8728.9	5095.3	4252	14796	3560.6	16664	13245	11465	13052	12600	15501	19261	14508	18645	C03592	--
mws1383	243.09	145	242.08	C12H10N4O2	[M+H]+	Lumichrome	Alkaloids	Alkaloids	1086-80-2	3	228700	211430	212390	116760	79213	105940	98205	124080	131910	167060	76834	39861	55508	82024	74130	79943	61246	44564	59908	58325	52428	67737	59064	64665	61927	65284	C01727	ko00740
pme0264	243.1	127	242.09	C10H14N2O5	[M+H]+	Thymidine	Nucleotides and derivatives	Nucleotides and derivatives	50-89-5	1	234420	232810	268050	148420	158380	128590	240520	257050	283180	268300	273040	371590	161950	176760	208280	349290	249250	292430	298440	277070	299710	330160	308310	319090	291940	309390	C00214	ko00240,ko01100
MWS2430	241.22	241.21	242.225	C15H30O2	[M-H]-	13-methylmyristic acid	Lipids	Free fatty acids	2485-71-4	1	78925	73692	87350	69748	79251	72494	62334	82853	99551	102020	127360	123210	69472	75352	91206	168310	172510	184570	303870	323090	318850	330520	305580	328140	355780	351040	--	--
mws0359	241.22	241.22	242.225	C15H30O2	[M-H]-	Pentadecanoic Acid	Lipids	Free fatty acids	1002-84-2	1	162150	108630	175740	116360	124030	132860	151860	150970	191370	245040	215780	209270	123040	145900	175590	331810	377020	348420	373860	359390	460660	517440	419850	495720	410900	517300	C16537	--
ML10180524	244.09	112.05	243.086	C9H13N3O5	[M+H]+	Cytarabine	Nucleotides and derivatives	Nucleotides and derivatives	147-94-4	1	2773700	4199000	3885800	17326000	13028000	11841000	3393800	4026900	4317500	3102900	3206500	5248900	12667000	9592900	7365700	3466700	2239300	2966400	3860900	4098500	4293000	5187200	4487500	4926100	4660300	4639900	C02961	--
pme3732	244.09	112	243.086	C9H13N3O5	[M+H]+	Cytidine	Nucleotides and derivatives	Nucleotides and derivatives	65-46-3	1	1539800	2213200	2012500	9392200	7259000	7888800	1980700	2194100	2631900	1550100	1801100	2339100	7533000	4430600	4559900	1944600	1317900	1935500	3482100	3029500	2833900	3111300	3759500	3919200	3674500	3614000	C00475	ko00240,ko01100,ko02010
MWSmce295	245.07	113.03	244.07	C9H12N2O6	[M+H]+	1-beta-D-Arabinofuranosyluracil	Nucleotides and derivatives	Nucleotides and derivatives	3083-77-0	2	1584000	1762900	1892200	1910500	1430500	1902800	1800600	1890500	1965000	1599200	1779900	1892800	2128900	1511500	1672400	2136300	1442700	2109500	1635100	1677100	1867200	1856100	1948800	1979800	1762800	1732500	C16908	--
mws0248	243.06	110	244.07	C9H12N2O6	[M-H]-	Uridine	Nucleotides and derivatives	Nucleotides and derivatives	58-96-8	1	3038500	3248100	2827100	3169600	2208200	2778100	2860400	3129800	3505500	3047700	2805500	2352700	3016700	2626600	2793800	3164100	2805800	3042200	2269400	2639200	3099200	3284400	3271000	2793000	3108400	2454900	C00299	ko00240,ko01100,ko02010
mws0976	243.06	153	244.07	C9H12N2O6	[M-H]-	β-Pseudouridine	Nucleotides and derivatives	Nucleotides and derivatives	1445-07-4	3	138360	146400	126580	205860	192180	163970	123570	135300	152990	170460	142820	162520	202050	162090	143800	142480	140120	158290	166080	159250	180950	211040	175930	150610	211120	238490	C02067	ko00240,ko01100
pme2266	245.1	227	244.088	C10H16N2O3S	[M+H]+	Biotin	Others	Vitamin	58-85-5	2	322370	273300	361380	141610	115840	121250	282840	344610	283250	243730	215140	145370	104350	109860	149430	322390	282990	311160	179950	166290	212790	192560	170090	191960	198150	205900	C00120	ko00780,ko01100,ko02010
Lmmn005696	243.1	228.08	244.11	C15H16O3	[M-H]-	Desoxyhemigossypol	Phenolic acids	Phenolic acids	57765-65-8	3	12715	10210	12196	8217.3	5360.3	6186.1	8641.2	9082.6	8848.9	12264	10287	9943	9707.9	10546	11681	13795	11355	11226	14803	8796.1	8811	10646	11455	10306	11453	12392	--	--
MWStz205	245.13	120.08	244.121	C14H16N2O2	[M+H]+	Cyclo(D-Phe-L-Pro)	Amino acids and derivatives	Amino acids and derivatives	26488-24-4	3	3088.8	1765.7	3134	866.32	4400.2	1745	5303.4	3522.2	7480.1	11881	3993	10110	4435	5696.5	3063.6	8373.2	5257.8	16334	6625.1	6156.4	6161.2	6205.4	6100.2	9731.4	9740.5	3567.1	--	--
MWStz255	245.13	120.08	244.121	C14H16N2O2	[M+H]+	Cyclo(Pro-Phe)	Amino acids and derivatives	Amino acids and derivatives	3705-26-8	3	2328.6	2758.2	5647.1	4623.8	1402.9	1376.6	3663.1	3725	6042.8	10592	5539.8	461.82	5599.6	3203.9	1137.5	6923.9	9652.2	10187	6002.8	5526.4	5473.9	12528	5530.7	8726.5	6929.2	4198.4	C11847	--
MWS5231	243.16	181.16	244.167	C13H24O4	[M-H]-	Tridecanedioic acid	Lipids	Free fatty acids	505-52-2	2	81148	86739	89718	97853	88546	96260	98194	86578	83719	101250	96230	92737	90378	91460	90872	99441	102870	102290	109410	113820	106720	115000	109650	113920	118600	116070	--	--
Lmhp002031	245.18	86.1	245.186	C12H24N2O3	[M+H]+	L-Leucyl-L-Leucine	Amino acids and derivatives	Amino acids and derivatives	3303-31-9	3	2400800	2789600	3064800	2592600	2163500	2481800	3235400	2663600	3648100	1677100	1502300	1653900	1961400	2179300	3332000	2276700	1716000	2155300	2455400	2587900	2517100	2372500	2534300	2515700	2638900	2346300	--	--
pmb2591	245.09	203.2	246.1	C13H14N2O3	[M-H]-	N-Acetyl-L-Tryptophan	Amino acids and derivatives	Amino acids and derivatives	1218-34-4	1	10969000	10423000	11940000	35793000	32328000	33455000	10851000	10513000	16125000	17943000	23434000	27685000	39186000	38951000	28925000	20640000	15560000	19017000	20636000	25396000	22783000	27292000	27554000	24134000	25191000	23349000	--	--
mws0124	247.11	130	246.1	C13H14N2O3	[M+H]+	N-(3-Indolylacetyl)-L-alanine	Amino acids and derivatives	Amino acids and derivatives	57105-39-2	2	15131	26812	33570	37815	68081	64490	32194	59499	16196	53479	15641	132230	52188	15174	24392	25364	22699	49770	81316	69542	80300	74302	88314	77541	97080	69422	--	--
Lmrj002087	247.13	86.09	246.121	C10H18N2O5	[M+H]+	L-Isoleucyl-L-Aspartate	Amino acids and derivatives	Amino acids and derivatives	-	1	668950	581150	747720	589390	549230	498300	604260	834770	801320	317450	273760	339300	384480	363580	342350	504980	253340	410890	563390	573520	598040	598480	653520	683950	607240	627590	--	--
mws0655	246.02	96.9	247.025	C8H10NO6P	[M-H]-	Pyridoxal-5'-phosphate	Others	Vitamin	54-47-7	3	68938	58247	58761	37201	28722	46680	126250	122840	91227	183160	262760	274870	55781	26847	41391	450890	427420	338100	47257	60479	38552	49048	41214	45452	50417	43610	C00018	ko00730,ko00750,ko01100
MWSmce116	252.1	136.06	251.102	C10H13N5O3	[M+H]+	5'-Deoxyadenosine	Nucleotides and derivatives	Nucleotides and derivatives	4754-39-6	2	124280	142810	118300	72543	84358	92689	142800	152480	125180	128190	178400	182110	96430	110730	125990	176190	194570	157110	92764	75465	82230	88677	95990	105310	95372	78571	C05198	--
pme3961	252.11	136	251.102	C10H13N5O3	[M+H]+	2'-Deoxyadenosine	Nucleotides and derivatives	Nucleotides and derivatives	958-09-8	1	1519900	1840500	1994900	1462400	1351600	1366500	1974100	1866000	2046800	1410500	1474600	2008000	1177800	1087700	1127000	1794100	1237400	1473300	1495400	1479600	1585700	1605000	1734100	1786000	1727500	1735800	C00559	ko00230,ko01100,ko02010
pme2776	253.09	137	252.086	C10H12N4O4	[M+H]+	2'-Deoxyinosine	Nucleotides and derivatives	Nucleotides and derivatives	890-38-0	3	118210	133290	141480	92872	104370	94127	132570	141120	145380	101880	100120	140430	76555	70538	80218	130300	83558	101720	89718	95059	117030	108240	107110	120820	129140	128750	C05512	ko00230,ko01100,ko02010
Lmhn003373	253.04	137.02	254.043	C11H10O7	[M-H]-	p-Hydroxybenzoylmalic acid	Phenolic acids	Phenolic acids	-	3	354400	540590	574570	217270	180930	230720	418240	525730	487640	586170	447600	613700	752840	555360	369780	960370	596740	618170	462680	475340	481880	533230	511960	541880	488950	563020	--	--
MWSHY0071	255.06	153.02	254.058	C15H10O4	[M+H]+	Chrysin	Flavonoids	Flavonoid	480-40-0	1	5012	2787	1389.8	3930.8	3166.6	1642.3	4361.8	8200.6	388.97	5469.7	820.77	2538.4	4854.8	4280.4	3073.2	1651.1	17944	1684.1	14615	13273	9859.9	11008	16652	11512	13772	11434	C10028	ko00941
Hmbp003234	255.09	163.03	254.079	C12H14O6	[M+H]+	1-O-Caffeoylglycerol	Lipids	Glycerol ester	-	3	18914	18949	26346	220160	177340	145880	24994	11870	42487	51264	56154	71105	151800	221290	180590	9328.6	39172	24872	27987	55330	45594	45715	34379	80046	46467	61415	--	--
mws0361	253.22	235.19	254.225	C16H30O2	[M-H]-	Palmitoleic Acid	Lipids	Free fatty acids	373-49-9	1	12131	8712.8	18201	8496.8	7854	4353.7	10697	11668	10799	15565	30265	17817	8643.8	5569.9	10836	35302	27464	42178	70237	65380	60754	62403	64420	67971	60732	75883	C08362	ko00061
Zmdn006929	255.07	213.06	256.074	C15H12O4	[M-H]-	Aloe-Emodin-9-Anthrone	Quinones	Anthraquinone	6247-99-0	2	33467	50809	37374	32132	44482	30410	197340	92427	42669	210170	39493	28225	37333	26864	50886	29749	401720	29256	215790	221620	220780	239820	233660	228210	223720	233710	C16760	--
MWSHY0124	257.08	153.02	256.074	C15H12O4	[M+H]+	Pinocembrin (Dihydrochrysin)	Flavonoids	Dihydroflavone	480-39-7	1	55116	94801	64498	62967	76134	53192	368500	175690	82666	430490	75028	47415	74183	51232	99257	56105	713250	52563	401290	450630	401130	407830	468860	482850	461550	460230	C09827	ko00941
pma3101	256.2	124.1	256.082	C11H14NO6+	[M+H]+	Nicotinate D-ribonucleoside	Others	Vitamin	17720-18-2	3	1076800	1365500	1390800	2400300	1869400	2256600	1114300	1187800	1422600	1180100	1354300	1438500	2249600	1693700	1807100	1026300	878190	1112100	1452300	1422000	1693200	1577200	1642800	1754100	1749200	1586100	C05841	ko00760,ko01100
MWS1888	255.09	93.03	256.095	C12H16O6	[M-H]-	Phenyl-beta-D-glucoside	Phenolic acids	Phenolic acids	1464-44-4	3	22872	22008	25232	24073	31232	31957	26983	25811	17283	12064	10931	12325	17722	24540	18285	11018	18754	18224	18221	16630	7767.4	21719	17340	14205	18371	17578	C11611	--
mws1488	255.23	237.22	256.24	C16H32O2	[M-H]-	Palmitic acid	Lipids	Free fatty acids	57-10-3	1	15382	14730	12568	11326	14248	9130.8	14856	14981	16424	12915	11690	12235	12582	12432	16839	20503	14526	26419	13191	14772	13441	16188	9483.8	9933.9	17201	16840	C00249	ko00061,ko00062,ko00071,ko00073,ko01040,ko01100,ko01212
mws0120	258.11	104.11	257.103	C8H20NO6P	[M+H]+	Choline Alfoscerate	Lipids	PC	28319-77-9	1	95297	110970	171750	3899.8	7775.8	8315.7	114690	277600	178360	32872	11879	13860	11037	5079.7	20223	185030	188240	173190	97465	96757	112890	130120	148710	99218	103460	106330	C00670	ko00564,ko00565
pme1187	257.08	124	258.085	C10H14N2O6	[M-H]-	5-Methyluridine	Nucleotides and derivatives	Nucleotides and derivatives	1463-10-1	3	5694.5	4972	7423.6	3636.3	2449.8	6340.6	2979.2	6475.3	5876.1	4009.4	6267.7	5292.5	9178.6	10526	5564.8	5802.6	870.36	4820.7	7958	7516.3	7082.9	2884.3	7183.2	9859	5086.7	4897.4	--	--
MWSslk133	257.18	195.18	258.183	C14H26O4	[M-H]-	1,14-Tetradecanedioic Acid	Lipids	Free fatty acids	821-38-5	3	29486	29204	29411	26581	31239	27320	32139	31216	30266	30227	31682	27628	29985	26923	26129	35061	28283	26889	31268	32603	36969	32360	36952	31199	35316	31073	--	--
Zmyn000110	258.04	78.96	259.046	C6H14NO8P	[M-H]-	D-Glucosamine 1-phosphate	Others	Saccharides and Alcohols	2152-75-2	3	27641	14529	13178	2501.3	8314.5	2854.9	12115	34084	29853	6039.6	7813	3011.6	1783.8	3548.4	4971.1	42863	42153	32696	29108	33650	30190	29324	29155	32694	31586	35516	C06156	ko00520,ko01100
mws1090	259.02	97	260.03	C6H13O9P	[M-H]-	Glucose-1-phosphate*	Others	Saccharides and Alcohols	59-56-3	1	2469700	1620000	1707600	128700	87409	109230	2657500	1771600	2911800	2909400	3012800	1805500	124480	228590	539660	4688500	6814700	6168300	2170100	2227500	2292600	2398200	2335000	2514700	2438500	2237000	C00103	ko00010,ko00040,ko00052,ko00500,ko00520,ko00523,ko00561,ko01100,ko01110
mws0866	259.02	97	260.03	C6H13O9P	[M-H]-	D-Glucose 6-phosphate*	Others	Saccharides and Alcohols	56-73-5	1	2680700	1542300	1516200	104850	77821	107460	2818600	2130600	2932800	2956900	3062300	1787300	115030	225300	535320	5284600	6847300	6450800	2237600	2258800	2295100	2152800	2452300	2415800	2371400	2503400	C00092	ko00500,ko00562,ko00998,ko01100,ko01110
MWS2442	259.02	96.97	260.03	C6H13O9P	[M-H]-	D-Fructose 6-Phosphate	Others	Saccharides and Alcohols	643-13-0	1	1499700	950860	1000200	71693	46306	64318	1653700	1347300	1715900	1677900	1738200	1097400	70565	126600	314100	3027700	4035900	3569700	1270800	1343000	1241200	1331400	1328800	1504500	1358000	1464600	C00085	ko00052,ko00500,ko00710,ko01100,ko01110,ko01200
Lmmn007256	259.1	231.04	260.105	C15H16O4	[M-H]-	Hemigossypol	Terpenoids	Sesquiterpenoids	40817-07-0	2	27350	23391	27244	24839	24042	27175	23219	26537	25939	23413	25081	24862	26132	24090	25075	22981	22901	28197	23305	22434	23193	23822	22917	22564	22705	20877	C09680	--
MWS4309	262.12	188.07	261.111	C13H15N3O3	[M+H]+	Glycyl-tryptophan	Amino acids and derivatives	Amino acids and derivatives	2390-74-1	3	127720	151650	174110	203240	213870	187660	190860	198810	198510	131390	130990	209100	245520	244850	189120	172700	129990	172990	154470	165080	169980	145950	163540	175690	170580	150700	--	--
Zmpn000095	261.04	78.96	262.045	C6H15O9P	[M-H]-	Sorbitol-6-phosphate	Others	Saccharides and Alcohols	20479-58-7	3	25769	18554	9241	8877.8	8899.2	5351.8	26752	23354	26231	28468	29848	19856	2638.4	6732	2608.2	35862	43681	46325	19838	13938	17594	17128	22472	13152	18006	16200	C01096	ko00051,ko01100
mws0715	263.1	145	264.111	C13H16N2O4	[M-H]-	Phenylacetyl-L-glutamine	Amino acids and derivatives	Amino acids and derivatives	28047-15-6	1	43452	63556	46820	139890	171610	129820	35171	51429	56320	10921	5686.7	13395	22907	41896	64503	7255.7	16405	14566	47692	39333	48571	57490	42728	29280	37169	40051	C04148	ko00360
Lmlp003161	265.15	177.06	264.147	C14H20N2O3	[M+H]+	N-Feruloylputrescine	Alkaloids	Phenolamine	501-13-3	2	19723	1492.2	10629	14685	7957.8	4973.9	3100.3	16373	12033	10247	10255	27696	9967.9	11366	27586	28746	16608	20278	46687	44763	20312	42122	35917	47773	37253	44622	C10497	ko00330,ko01100
pme1184	268.1	152	267.097	C10H13N5O4	[M+H]+	2'-Deoxyguanosine	Nucleotides and derivatives	Nucleotides and derivatives	961-07-9	1	450240	470060	496890	327740	295350	299280	445670	527920	558270	396720	401780	742980	316860	324660	333740	513600	472920	457610	635380	588460	622640	606860	634030	671310	640390	674630	C00330	ko00230,ko01100,ko02010
pme0230	268.1	136.06	267.097	C10H13N5O4	[M+H]+	Adenosine	Nucleotides and derivatives	Nucleotides and derivatives	58-61-7	1	17604000	20317000	20238000	22743000	20881000	21514000	20321000	21528000	23173000	14591000	18561000	17945000	7923600	6731500	10618000	15679000	14375000	14635000	12668000	12635000	13003000	12597000	13687000	13206000	13961000	13724000	C00212	ko00230,ko01100,ko02010
pma2172	268.13	121	267.126	C17H17NO2	[M+H]+	Cinnamoyltyramine	Alkaloids	Phenolamine	20384-14-9	3	558.9	9027.2	826.63	1274.7	1483.8	1367.9	17431	7699	10634	6203.4	4558.4	66103	9595.7	650.31	2942.7	52134	6804.5	12025	1187800	1211500	1317400	1325800	1266500	1278900	1230900	1287300	--	--
pme2890	269.06	136	268.055	C8H16N2O4S2	[M+H]+	L-Homocystine	Amino acids and derivatives	Amino acids and derivatives	626-72-2	2	51390	74546	67436	86407	34061	62171	82762	90385	86989	43072	76781	41350	25786	39602	48560	82834	47402	53573	179410	69975	188410	108330	167610	212640	195950	168070	C01817	ko00270
mws1060	267.07	135	268.081	C10H12N4O5	[M-H]-	9-(Arabinosyl)hypoxanthine	Nucleotides and derivatives	Nucleotides and derivatives	7013-16-3	1	2436200	3261100	3561700	825740	788660	770270	3672000	2156000	1741900	4028600	2841000	2770500	918320	1055000	1348800	2379200	2028700	2120100	1669800	1943700	1636500	1986800	1800700	1821900	1799300	1696900	--	--
pme1119	269.09	137	268.081	C10H12N4O5	[M+H]+	Inosine	Nucleotides and derivatives	Nucleotides and derivatives	58-63-9	3	547580	595460	548910	422550	323440	262460	685330	376450	329530	595700	558590	433340	166790	131930	184570	405930	417090	398090	699790	503480	583300	517130	696550	717360	724510	780660	C00294	ko00230,ko01100,ko02010
pmp000087	269.1	177.05	268.095	C13H16O6	[M+H]+	2-Feruloyl-sn-glycerol	Phenolic acids	Phenolic acids	-	1	1412600	1646700	2379400	9732500	6242800	10226000	2364600	2488400	2796900	6831300	7362700	9582700	11512000	15621000	11716000	3892700	4586200	4490800	4858800	4972900	3875500	5151300	2154100	6218800	3560100	3980600	--	--
pmp000086	269.1	177.05	268.095	C13H16O6	[M+H]+	1-Feruloyl-sn-glycerol	Phenolic acids	Phenolic acids	-	2	1598100	2265600	2295800	6913400	7442700	10243000	2865700	2565500	2675300	5303800	7187000	11211000	16490000	14555000	11992000	3773300	4375200	3440500	4842800	3649900	4784800	5308000	3904400	5515900	3819700	4001100	--	--
mws0383	267.23	267.23	268.24	C17H32O2	[M-H]-	10-Heptadecenoic Acid	Lipids	Free fatty acids	29743-97-3	1	558140	490760	606010	466260	265170	401200	507210	526880	723880	650270	649460	431780	378960	400510	533250	1036100	939420	1282400	1849100	1434800	1346900	1722900	1231600	1286100	1121800	1523200	--	--
mws1659	269.05	225	270.053	C15H10O5	[M-H]-	Emodin	Quinones	Anthraquinone	518-82-1	2	262.38	37.36	224.96	187.7	515.96	168	169.24	592.16	262.44	896.1	75.08	52.62	633.66	262.38	337.54	165.06	261.84	131.62	2001.9	787.86	1013.8	1350.6	2287.2	1941.8	1476.3	1762.7	C10343	--
Zmdn007764	269.05	225	270.053	C15H10O5	[M-H]-	isoemodin	Quinones	Anthraquinone	-	2	287.5	287.77	300.82	164.31	687.23	288.58	329.15	329.24	301.52	571.71	241.51	283.75	799.19	246.65	737.59	185.2	776.04	328.73	1724.9	2151.5	2114.4	2916	2404	1494.7	2852.2	2470.7	--	--
mws1175	271.1	167.04	270.089	C16H14O4	[M+H]+	Pinostrobin	Flavonoids	Dihydroflavone	480-37-5	3	73656	74763	42506	34974	47875	41088	261730	153620	65337	540540	68241	48633	53551	37968	86503	47347	571310	43269	58546	66811	59140	62828	72499	63676	63618	71770	C16419	ko00941
mws1297	269.1	101.02	270.11	C13H18O6	[M-H]-	Benzyl glucoside	Phenolic acids	Phenolic acids	4304-12-5	1	58632	67095	65073	82294	78802	73337	56782	54886	65174	27853	28619	27924	50346	57584	40597	23503	21781	23630	35215	46483	35891	39158	34182	40259	42471	40986	--	--
MWS20159	271.12	91.05	270.11	C13H18O6	[M+H]+	Phenyl-β-D-glucoside	Others	Others	-	3	61481	86006	72723	64526	44585	43151	62165	67246	78498	25464	27423	22536	24537	39920	37111	21368	20162	23264	38384	28732	38598	32956	34022	26219	36664	35991	--	--
pme0376	271.06	151	272.068	C15H12O5	[M-H]-	Naringenin (5,7,4'-Trihydroxyflavanone)*	Flavonoids	Dihydroflavone	480-41-1	2	63525	85294	79809	86162	120480	116940	126220	73269	81570	79320	64000	93721	123140	139060	163380	57448	100910	49015	61928	68503	70540	63774	65612	69351	71276	71540	C00509	ko00941,ko00943,ko01100,ko01110
pme2960	273.08	153	272.068	C15H12O5	[M+H]+	Naringenin chalcone*	Flavonoids	Chalcones	73692-50-9	2	57584	73748	69239	84661	92752	94480	100380	66129	75233	70065	66363	87864	112680	115430	131310	43147	92825	48823	59882	57945	66889	56544	64940	70932	63638	58493	C06561	ko00941,ko01100,ko01110
mws0914	271.06	151	272.068	C15H12O5	[M-H]-	Pinobanksin*	Flavonoids	Dihydroflavonol	548-82-3	2	51857	79875	67642	73354	93123	95720	106500	80290	77280	62960	61876	73983	105000	122070	131260	43748	90689	41141	61242	57448	58183	62468	64558	61153	62753	58882	C09826	ko00941
MWSmce675	271.08	108.02	272.09	C12H16O7	[M-H]-	Arbutin	Others	Others	84380-01-8	1	347940	362110	382290	640140	685550	569490	392250	423290	420600	537430	486730	493210	984130	1123100	878960	463480	537140	532750	352950	367540	360690	420450	447040	389500	385110	364850	--	--
Lmmn003323	271.23	225.22	272.235	C16H32O3	[M-H]-	2-Hydroxyhexadecanoic acid	Organic acids	Organic acids	764-67-0	2	321820	263300	336020	278420	227210	252040	333480	394890	501170	314200	349140	332990	173170	167360	255210	351460	415530	375920	663960	722910	670600	686970	717650	735830	731510	768790	--	--
MWSslk154	277.13	115.04	276.121	C12H20O7	[M+H]+	Triethyl citrate	Organic acids	Organic acids	77-93-0	3	33777	35076	32057	24758	30445	27568	39199	49325	44300	62474	51643	53186	26008	24800	26993	52202	45413	50056	21691	23647	23020	30678	26681	28396	27420	25474	--	--
pmb1574	277.2	93	276.209	C18H28O2	[M+H]+	9,12-Octadecadien-6-Ynoic Acid	Lipids	Free fatty acids	61481-29-6	3	587490	737500	1547000	192080	199130	245890	1089400	999170	1505000	327300	299910	469690	314260	195910	217620	793020	328310	446600	1433200	1463000	1481000	1493900	1458600	1473600	1484000	1531500	--	--
mws1038	277.12	146	278.13	C11H22N2O4S	[M-H]-	Pantetheine	Others	Others	496-65-1	1	5419.7	3234.6	7637.4	56780	49321	26321	2578.5	5260.7	5807.3	3655.7	7031.2	7611.8	37176	30779	23265	2167.5	1804.4	7633.9	32180	44169	31470	34189	37738	25955	23126	41312	C00831	ko00332,ko00770,ko01110
Lmxp011770	279.16	149.02	278.152	C16H22O4	[M+H]+	Diisobutyl phthalate*	Phenolic acids	Phenolic acids	84-69-5	1	31980000	32573000	31839000	33635000	37140000	34430000	33180000	33602000	31338000	34285000	36897000	33599000	33385000	33068000	39644000	33092000	31787000	31798000	22087000	24855000	23717000	24725000	26918000	24709000	26187000	25171000	C15205	--
MWSmce341	279.16	149.03	278.152	C16H22O4	[M+H]+	Butyl isobutyl phthalate	Phenolic acids	Phenolic acids	17851-53-5	2	32329000	34736000	32055000	34894000	37268000	35547000	33176000	34430000	31693000	36305000	35980000	34962000	34661000	35286000	38711000	30744000	32864000	33609000	23432000	23783000	26183000	25102000	25751000	26295000	25867000	26462000	--	--
Lmlp012720	279.16	149.02	278.152	C16H22O4	[M+H]+	Dibutyl phthalate*	Phenolic acids	Phenolic acids	84-74-2	1	30687000	33768000	32310000	32257000	36765000	35041000	33172000	33263000	29355000	32624000	35496000	35789000	34663000	31716000	38882000	31543000	29137000	30355000	23524000	23856000	25054000	24427000	26259000	25123000	24604000	25048000	C14214	--
mws5035	279.17	120.08	278.163	C15H22N2O3	[M+H]+	L-Leucyl-L-phenylalanine	Amino acids and derivatives	Amino acids and derivatives	56217-82-4	1	1059700	1337600	1320600	1662600	1559400	1530000	1224900	1069000	1219400	958660	671900	927620	1307700	1445500	2154200	1152300	935700	995470	1157100	1198900	1228300	1283800	1378400	1342700	1404200	1338100	--	--
Lmbn005923	277.22	59.01	278.225	C18H30O2	[M-H]-	Crepenynic acid	Lipids	Free fatty acids	2277-31-8	1	328770	342340	345310	359410	315620	312630	394110	414880	494690	299720	352860	294940	298250	277540	369790	338860	389640	375290	363800	348740	355050	382680	371110	364630	375530	397100	C07289	ko00591
pmb1650	279.2	149.4	278.225	C18H30O2	[M+H]+	Octadeca-11E,13E,15Z-trienoic acid	Lipids	Free fatty acids	25575-00-2	3	10108000	11076000	9869700	11229000	13076000	11501000	11078000	10778000	9785000	10735000	11823000	11355000	11136000	10516000	12778000	9457900	10188000	10309000	6970900	7586800	8125600	7775300	7664500	7962900	8410500	7480800	--	--
MWSmce692	277.22	59.01	278.225	C18H30O2	[M-H]-	γ-Linolenic Acid	Lipids	Free fatty acids	506-26-3	1	328280	334440	353040	327340	312500	303000	381100	408220	491770	281160	348130	304540	306490	271450	364050	315280	378570	357620	357130	348940	368210	372940	362800	361910	354450	395660	C06426	ko00591,ko01040,ko01100
pmb0889	279.23	95.1	278.225	C18H30O2	[M+H]+	Punicic acid (9Z,11E,13Z-octadecatrienoic acid)	Lipids	Free fatty acids	544-72-9	1	4429800	4649800	5084200	1934100	1872700	2297900	5468400	5873900	7076500	1787000	2578900	2342500	2532700	2173300	2474700	2671100	2418200	2823600	7557000	7943700	8187400	7953100	8435800	8496000	7752700	8323900	C08364	--
mws0367	277.22	277.22	278.225	C18H30O2	[M-H]-	α-Linolenic Acid	Lipids	Free fatty acids	463-40-1	1	16515000	16784000	16451000	16427000	15540000	15059000	19383000	19174000	23379000	13269000	17299000	15124000	14926000	13135000	17086000	15761000	18025000	17870000	16571000	17137000	17155000	18230000	17830000	18135000	17069000	19152000	C06427	ko00592,ko01040,ko01100,ko01110
Lmhn002926	279.05	163.04	280.058	C13H12O7	[M-H]-	p-Coumaroylmalic acid	Phenolic acids	Phenolic acids	-	2	4705900	4370300	5205200	4795600	5494900	4512900	4957600	5087000	5151100	4300100	4454500	4173400	4408500	3903400	3703600	4177500	4108100	4393000	3495300	3737100	3596500	3371600	3606900	3690900	3418900	3602200	--	--
mws0629	281.11	166	280.106	C13H16N2O5	[M+H]+	L-Aspartyl-L-Phenylalanine	Amino acids and derivatives	Amino acids and derivatives	13433-09-5	1	326520	343620	392720	336790	306180	309490	387700	432010	513290	178200	197240	208810	257820	255070	197780	278090	220390	233260	314230	325910	318530	309090	342470	340450	330000	320230	--	--
Lmbp010382	281.12	91.05	280.11	C18H16O3	[M+H]+	6-Methoxy-2-(2-phenylethyl)chromone	Others	Others	84294-89-3	3	17612	18088	18005	18708	8372.8	11572	10811	8316.7	16110	19116	20355	21565	38064	15474	22789	22097	9856.5	25586	32651	37224	36579	39747	46712	40048	42458	40132	--	--
pmp001245	280.15	221.08	280.138	C15H22NO4+	[M]+	Feruloylcholine	Alkaloids	Phenolamine	85927-25-9	1	378080	402430	309040	897250	1025400	904120	289440	157130	275620	574080	2392900	1172700	8363700	1560900	3011000	637560	1521300	916930	735160	802140	721480	710780	725160	789430	880130	767980	--	--
mws1491	279.23	279.23	280.24	C18H32O2	[M-H]-	Linoleic acid	Lipids	Free fatty acids	60-33-3	1	31449000	30731000	34920000	23439000	23966000	25068000	31749000	34189000	36028000	20149000	29990000	26054000	21869000	21546000	27771000	28470000	31719000	31014000	31520000	35275000	34227000	39824000	32985000	39225000	33525000	35272000	C01595	ko00591,ko01040,ko01100
Lmbn006152	279.23	59.01	280.24	C18H32O2	[M-H]-	(9Z,11E)-Octadecadienoic acid	Lipids	Free fatty acids	2540-56-9	1	20770	19649	20849	16109	15958	12368	21842	22376	22871	14337	15020	14935	12124	11598	16565	21773	18937	20613	16015	23426	21040	22704	22497	20743	21317	25522	C04056	ko00591
MWS4354	282.12	150.08	281.112	C11H15N5O4	[M+H]+	N6-methyladenosine	Nucleotides and derivatives	Nucleotides and derivatives	1867-73-8	1	155220	247870	244700	1214500	1126900	968270	181540	171220	176010	188740	162300	220510	1198400	902830	903860	178360	89713	146290	332540	390710	388000	354150	407240	355600	420920	439550	--	--
Hmhp001812	282.12	136.06	281.112	C11H15N5O4	[M+H]+	2'-O-Methyladenosine	Nucleotides and derivatives	Nucleotides and derivatives	2140-79-6	1	162420	212970	212350	1127700	872250	767320	188610	250120	240880	240430	250660	313650	882130	767040	648090	168540	85140	160890	451680	471940	427670	468280	493980	501740	491240	502110	--	--
YC512118	282.28	247.24	281.272	C18H35NO	[M+H]+	Oleamide (9-Octadecenamide)	Lipids	Free fatty acids	301-02-0	1	9753.6	6499.5	7767.8	8991.9	7156.3	7695	9964.9	8850.5	6710.4	6281.7	8676	7221.8	6646.9	13994	10484	7332.2	9329.1	8202.6	10081	11053	11299	10373	12053	10276	9957.6	9956.4	C19670	--
Lmcp005230	283.1	163.04	282.089	C17H14O4	[M+H]+	6-Hydroxy-2-[2-(4-hydroxyphenyl)ethyl]chromone	Others	Others	-	3	5918.1	14975	6727.8	9611.9	10259	11493	10994	11012	10042	40512	32155	38854	14052	18991	18707	29275	39984	36803	17399	17109	16201	17288	22139	20682	19022	19581	--	--
Lmyn012331	281.25	281.25	282.256	C18H34O2	[M-H]-	Petroselinic acid	Lipids	Free fatty acids	593-39-5	2	4563500	3560100	3407500	2730000	2819200	2862800	3113800	3838900	5334600	3149100	3008500	2983900	1923400	2108900	2675300	4842100	4677700	5642200	3942800	4336800	3974900	5662200	3960500	3484700	4390800	6108700	C08363	--
mws2623	281.25	281.25	282.256	C18H34O2	[M-H]-	11-Octadecanoic acid(Vaccenic acid)	Lipids	Free fatty acids	506-17-2	1	4883900	3846500	4195000	3187000	3136600	3396200	4523400	4410800	5001700	3757300	3765400	3278300	2115300	2411900	2822700	6403800	6094100	6572100	5128200	5354900	4645800	6491300	4710700	3759100	5363200	7035400	C21944	--
pme1178	284.1	152	283.092	C10H13N5O5	[M+H]+	Guanosine	Nucleotides and derivatives	Nucleotides and derivatives	118-00-3	1	45072000	49304000	48537000	85424000	66083000	71546000	49785000	50991000	54626000	45999000	51304000	55797000	67896000	58302000	61530000	47517000	39403000	44536000	40816000	38972000	41628000	42139000	42533000	46568000	43984000	45712000	C00387	ko00230,ko01100,ko02010
Hmqp002567	284.13	147.04	283.12	C17H17NO3	[M+H]+	P-Hydroxycinnamic acid p-hydroxyphenethylamine	Phenolic acids	Phenolic acids	-	1	9352	17307	11455	63070	119760	9096.9	29647	32450	116800	23520	58989	684300	49230	11689	14976	556330	22536	44283	1077200	1072600	1127400	1232500	1105500	1147500	1092700	1136000	--	--
MWSmce089	284.12	147.04	283.121	C17H17NO3	[M+H]+	p-Coumaroyltyramine	Lignans and Coumarins	Coumarins	36417-86-4	1	10920	20298	7461.9	59760	107880	4370.8	28757	29088	101620	18808	55011	701430	55152	9995.1	16487	542950	20231	45135	1011000	1082100	1077800	1068000	1166200	1177800	1093900	1034500	--	--
Zmwp005562	284.13	147.04	283.121	C17H17NO3	[M+H]+	cis-N-p-Coumaroyltyramine	Alkaloids	Phenolamine	-	1	7508.7	19351	14266	59411	114500	5556	27294	30129	109590	20241	53888	643100	44868	10355	15800	535170	20382	35441	1039400	1108500	1083000	1152100	1196000	1104000	1112500	1121900	--	--
mws0051	285.08	270	284.068	C16H12O5	[M+H]+	Acacetin	Flavonoids	Flavonoid	480-44-4	1	147170	270540	215490	119210	149340	124070	266870	235220	259030	87187	124560	280510	340940	211200	152240	408210	181460	161920	3017200	3148800	3540500	3341400	3463400	3248700	3244400	3461400	C01470	ko00944
MWSHY0187	285.08	168.01	284.068	C16H12O5	[M+H]+	5,7-Dihydroxy-6-methoxyflavone	Flavonoids	Flavonoid	480-11-5	2	5059	9815.8	5369.1	5611.7	3965.8	4395.8	7919.3	6705.2	6940	1443.4	4621.2	7976.8	9913.6	5758	3951.4	11618	6029	5224.1	86992	95518	96775	98884	93443	87607	87650	98085	--	--
mws4160	285.08	270.07	284.068	C16H12O5	[M+H]+	Wogonin (5,7-Dihydroxy-8-Methoxyflavone)	Flavonoids	Flavonoid	632-85-9	2	231130	443460	376910	176200	224170	199500	403940	318660	398700	117010	179390	423340	491950	305310	216950	665900	286970	237800	4714800	5138300	5051200	5195600	5441400	5078800	5101500	5175900	C10197	--
mws0129	285.08	270	284.068	C16H12O5	[M+H]+	Genkwanin (Apigenin 7-methyl ether)	Flavonoids	Flavonoid	437-64-9	1	6647.2	4229.1	1747.4	5944.7	514.28	3120.9	6167.7	5597.1	3614.3	3436.5	854.22	4313.7	3711	2676.8	2670.3	6437.3	13861	3756.4	151940	149480	166570	171660	156150	167690	154010	157190	C10046	--
mws0668	283.07	151	284.076	C10H12N4O6	[M-H]-	Xanthosine	Nucleotides and derivatives	Nucleotides and derivatives	146-80-5	1	3008400	3552700	4953900	1792900	1616600	1980500	4302300	2879900	2240100	5629200	4182400	4259200	3492500	3946700	3047800	5152600	3130900	3980500	2286100	2531100	2543000	2614800	2675800	2549600	2411000	2574500	C01762	ko00230,ko00232,ko01100,ko01110,ko02010
mws1505	283.1	135	284.105	C17H16O4	[M-H]-	Phenethyl caffeate	Phenolic acids	Phenolic acids	104594-70-9	3	5851.3	9361.9	5639.1	6983.5	4436.6	4666.5	2448.3	4440.6	8277.4	4492.2	7727.6	3634.9	5991	3571.8	4868.4	5713.2	15346	4467.8	5019.1	4107	5350.7	6350.3	5023.6	5990.2	5860.8	4458.2	C10484	--
mws1489	283.26	283.26	284.272	C18H36O2	[M-H]-	Stearic Acid	Lipids	Free fatty acids	57-11-4	1	59680000	80713000	66466000	82446000	60584000	50249000	59914000	68893000	66624000	55043000	78892000	74866000	68355000	65404000	64012000	72918000	79673000	85667000	42614000	40879000	42660000	39120000	39385000	35644000	34778000	38819000	C01530	ko00061,ko01040
Zmyn005026	283.26	283.26	284.272	C18H36O2	[M-H]-	16-Methylheptadecanoic acid	Lipids	Free fatty acids	2724-58-5	2	30435000	39448000	33208000	40562000	30866000	23590000	28983000	31574000	30155000	27657000	37384000	36203000	31032000	29632000	29245000	34903000	36712000	41637000	19154000	18829000	18473000	17614000	17838000	14923000	14775000	16252000	C20356	--
mws1068	285.04	151	286.048	C15H10O6	[M-H]-	Kaempferol (3,5,7,4'-Tetrahydroxyflavone)	Flavonoids	Flavonols	520-18-3	1	1616000	2265000	3040600	1490600	1617300	1900600	2774700	3000900	2499100	499910	482440	777070	1053400	845860	872920	622580	566940	584780	956940	1078700	1020900	1037600	1039500	1107700	1017000	1041900	C05903	ko00941,ko00944,ko01100,ko01110
Zmzp006523	287.06	195.03	286.048	C15H10O6	[M+H]+	6-Demethoxycapillarisin	Others	Others	61854-36-2	3	8020.7	10082	13224	8218.7	6103.2	7386.5	9704.2	12913	11593	3225.7	1474.8	1707.4	4420	3520	6022.5	4082.6	3186.4	2670.6	2420	3939.2	5336.3	7255.1	5340	4256.1	7037.2	8648.7	--	--
mws1521	285.1	121.03	286.105	C13H18O7	[M-H]-	Salicin	Phenolic acids	Phenolic acids	138-52-3	3	74015	45536	48575	85058	117980	158010	65633	66386	57098	184700	186890	169030	505920	563970	307500	146120	171520	170840	125940	149550	134320	136900	140560	147480	109590	126820	C01451	ko00010
Lmbp006165	287.13	91.05	286.121	C17H18O4	[M+H]+	6,7-cis-Dihydroxy-2-(2-phenylethyl)-5,6,7,8-tetrahydrochromone	Others	Others	-	3	252620	232830	238790	175900	193530	168810	185300	204140	240380	473140	298370	322900	326360	316930	294350	352070	382380	357860	223070	203730	225100	231940	243520	197920	217870	219400	--	--
MWSslk132	285.21	223.21	286.214	C16H30O4	[M-H]-	Hexadecanedioic acid	Lipids	Free fatty acids	505-54-4	3	98025	96403	99184	82088	78852	96718	98851	95325	99399	85860	112640	95248	111920	101350	90027	83558	100430	91856	116220	121600	120190	112870	125280	118730	122490	124640	C19615	ko00073,ko01100
Zmyn005252	285.24	239.24	286.251	C17H34O3	[M-H]-	3-Hydroxy-palmitic acid methyl ester	Lipids	Free fatty acids	51883-36-4	3	14210	10354	15835	12738	12955	15829	10927	12017	12248	14250	14921	11894	11416	8952.3	7469.2	18346	17081	11927	9903.5	11425	11604	13538	11643	14116	12205	12969	C11849	--
mws1436	287.29	97.2	286.287	C18H38O2	[M+H]+	1,18-Octadecanediol	Lipids	Free fatty acids	3155-43-9	2	6085.7	7112.8	5243.4	34343	71110	28592	72807	66297	54928	93349	51232	75767	4665.4	5161.4	4172.6	55468	47993	98758	20470	21889	21548	20892	21247	19435	22137	23977	--	--
mws1094	287.06	259	288.063	C15H12O6	[M-H]-	Aromadendrin (Dihydrokaempferol)	Flavonoids	Dihydroflavonol	480-20-6	2	21879	41098	39518	25692	23400	26761	38960	32823	28801	6866.4	9480.8	7228.7	11102	10614	10707	7998.8	9348	5486.4	18287	16400	17175	22615	21526	20601	21930	19049	C00974	ko00941,ko01100,ko01110
mws0064	287.06	135	288.063	C15H12O6	[M-H]-	Eriodictyol (5,7,3',4'-Tetrahydroxyflavanone)	Flavonoids	Dihydroflavone	552-58-9	3	1988.9	2957.8	1865.8	3684.5	3075.5	1732.2	9955.1	4161.3	1743.6	11917	6736.9	10189	13512	14255	16351	7664.6	11382	6687.1	6059.9	5640.7	6031.7	4295.5	6896.6	7606.5	5418	6199.3	C05631	ko00941,ko01100,ko01110
Lmyn007883	287.22	287.22	288.23	C16H32O4	[M-H]-	9,16-Dihydroxypalmitic acid	Lipids	Free fatty acids	38076-49-2	2	2278200	2128800	2330500	1639900	1418300	1661900	1885600	1656600	2037100	2602100	2399200	1981200	1800600	1431200	1628200	2407200	2018500	2556800	1315800	1324800	1344900	1338400	1379300	1382700	1359500	1393900	--	--
pmn001686	287.22	241.22	288.23	C16H32O4	[M-H]-	10,16-Dihydroxypalmitic acid	Lipids	Free fatty acids	3233-90-7	1	81693	74990	87066	57664	48802	72616	70372	64009	72395	94683	91201	75986	69669	59212	64940	83586	73789	91732	50266	47058	52118	49329	50455	53790	57402	54697	C08285	ko00073
pme3163	289	97	290.04	C7H15O10P	[M-H]-	D-Sedoheptuiose 7-phosphate	Others	Saccharides and Alcohols	2646-35-7	3	818570	621740	722300	224710	162640	167130	1128600	850670	1073700	452060	584030	726500	250850	130200	211410	1342300	1843100	1382300	521730	652210	592060	776930	651980	592710	445470	615030	--	--
pmb2657	289.1	97.1	290.123	C10H18N4O6	[M-H]-	Argininosuccinic acid	Organic acids	Organic acids	2387-71-5	3	219320	133680	179580	13991	5960.4	9506.6	323680	247850	227100	149750	151730	92321	11902	12643	47001	378590	348290	360880	148670	133330	134290	138450	142280	146270	141500	153050	C03406	ko00220,ko00250,ko01100,ko01110,ko01230
pmb0885	291	190.9	290.188	C18H26O3	[M+H]+	4-Oxo-9Z,11Z,13E,15E-Octadecatetraenoic Acid	Lipids	Free fatty acids	-	3	716630	653130	710130	484500	491640	512130	575840	661640	733630	627740	598200	373260	365460	476830	494040	401830	372650	401050	458100	483960	517220	527230	531380	500140	502490	522360	--	--
pmf0314	289.25	157	290.261	C20H34O	[M-H]-	cis-Abienol	Others	Saccharides and Alcohols	17990-16-8	3	13588	20273	15092	16583	18371	16449	21470	17437	19952	14191	16563	17161	21300	20147	15692	14023	16251	14191	11866	20601	19632	14139	22654	12266	15413	15283	--	--
Zmyn004548	291.2	235.17	292.204	C18H28O3	[M-H]-	12-Oxo-phytodienoic acid	Lipids	Free fatty acids	85551-10-6	1	10774	9379.7	11880	12645	8043.2	9894.3	17387	18135	30964	6265.2	11802	8489.2	9745.6	5770.8	13541	9071.1	13168	9584.6	14396	13972	12878	15747	15077	15127	15184	14660	C01226	ko00592,ko01100,ko01110
MWSmce689	293.25	95.09	292.24	C19H32O2	[M+H]+	Methyl linolenate	Lipids	Free fatty acids	301-00-8	2	73762	82468	98257	60156	48736	58862	75843	81260	130970	18219	22577	14180	7966.3	10468	14447	22803	18450	21789	550770	527510	640990	597500	586720	535980	553290	601960	--	--
Zmpn003368	293.21	195.14	294.219	C18H30O3	[M-H]-	13S-Hydroxy-9Z,11E,15Z-octadecatrienoic acid	Lipids	Free fatty acids	87984-82-5	1	352870	375940	509010	361860	302680	312730	540410	522990	816660	160950	268610	168700	180150	113570	251320	223280	232020	204280	518470	517940	503450	537240	541430	539100	537220	527790	C16316	ko00592
pmb2786	293.21	235.17	294.219	C18H30O3	[M-H]-	9-Hydroxy-10,12,15-octadecatrienoic acid*	Lipids	Free fatty acids	89886-42-0	3	26759	25244	25644	21431	22128	29189	38099	42402	64234	12921	24485	14605	28128	18739	43796	20603	23506	18286	41947	43925	37488	44964	44238	44147	46813	41171	C16326	ko00592
Zmyn004732	293.21	185.12	294.219	C18H30O3	[M-H]-	2R-hydroxy-9Z,12Z,15Z-octadecatrienoic acid	Lipids	Free fatty acids	-	3	29742	28377	35953	11628	17153	15215	35406	46432	42034	21574	17960	15656	13136	12414	11952	32014	26549	26660	110610	101970	105070	101950	106490	108660	101230	111710	C16342	ko00592
Zmyn004676	293.21	113.1	294.219	C18H30O3	[M-H]-	17-Hydroxylinolenic acid	Lipids	Free fatty acids	-	1	1286400	1303100	1473200	475930	549960	545730	1479400	1675200	1945400	355270	648980	597540	685590	512870	685320	587730	536890	574440	1912100	1955100	1936100	2074500	2007500	2091200	2006900	1999700	C16346	ko00592
pmb2787	293.21	275.1	294.219	C18H30O3	[M-H]-	9-Oxo-10E,12Z-octadecadienoic acid	Lipids	Free fatty acids	54232-59-6	3	63824	67341	77822	37689	39655	46546	86131	102350	143940	27270	37096	33107	58147	34329	69377	32026	42670	42267	122650	113710	115310	104370	93795	110370	112680	128770	C14766	ko00591
Lmbn005443	293.21	235.17	294.219	C18H30O3	[M-H]-	13-KODE; (9Z,11E)-13-Oxooctadeca-9,11-dienoic acid*	Lipids	Free fatty acids	54739-30-9	3	25741	25442	30239	22046	22705	26748	34747	38302	58740	14868	22617	18395	27425	21022	36458	18029	24464	22983	47406	47022	41000	47758	43727	47251	48026	45319	C14765	ko00591
pmb2792	293.21	193.1	294.219	C18H30O3	[M-H]-	13-Hydroxy-6,9,11-octadecatrienoic acid	Lipids	Free fatty acids	74784-20-6	3	101240	106660	118240	103260	130630	115510	98167	62825	75174	106990	140800	106580	144600	128110	67852	102310	85273	55192	32974	33974	32009	35802	39170	34062	32116	37882	--	--
Lmcn009539	293.25	293.25	294.256	C19H34O2	[M-H]-	E,E,Z-1,3,12-Nonadecatriene-5,14-diol	Lipids	Free fatty acids	-	1	12979	10335	11309	5333.1	6723.3	7447.8	9829.8	10209	19090	7473.3	12513	9228.4	3803.3	6644.1	10803	9749.2	16658	17028	9502.8	12971	15500	17482	13116	12647	18044	16913	--	--
Zmbp003483	296.11	134.06	295.106	C14H17NO6	[M+H]+	Indican	Alkaloids	Plumerane	487-60-5	2	297960	232500	282300	245560	195530	217550	297870	294050	258820	230020	202030	165490	192790	189990	198320	172520	209120	215080	243300	162970	191210	186890	220740	198050	215610	192310	C08481	--
Lmcp007250	297.11	91.05	296.105	C18H16O4	[M+H]+	5-Hydroxy-6-methoxy-2-(2-phenylethyl)chromone	Others	Others	-	3	4120.7	4689.2	2096.2	10289	10786	13450	2165.3	3215.6	5560	7752.6	11545	5354.3	12986	8596.6	13612	6495.1	10391	9754.1	7583	6840.2	8474.9	9095.9	8620.9	6802.6	5324.6	5244.9	--	--
Hmqp005455	297.24	81.07	296.234	C18H32O3	[M+H]+	15(R)-Hydroxylinoleic Acid*	Lipids	Free fatty acids	177931-23-6	1	106420	89443	121990	71466	114710	77627	116510	118820	228640	49987	80745	71996	74322	93324	127320	94665	95421	82618	457820	419040	424120	438720	408770	483540	486830	474590	--	--
Hmqp005411	297.24	81.07	296.234	C18H32O3	[M+H]+	9-Oxo-12Z-Octadecenoic acid*	Lipids	Free fatty acids	112543-32-5	1	111660	92333	132090	78797	110190	80650	111980	117670	240220	45482	69779	75787	83153	96677	131190	88709	96811	98436	439180	505060	485300	447680	530960	420740	439640	486540	--	--
Rfmb091	295.23	195.14	296.235	C18H32O3	[M-H]-	9S-Hydroxy-10E,12Z-octadecadienoic acid*	Lipids	Free fatty acids	15514-85-9	1	3097000	2797000	3454300	1215600	1353200	1423100	3255100	3657000	4209900	981580	1456000	1492700	1578600	1253200	1504900	1558900	1390300	1556800	4752500	4851800	4828700	4982000	5006300	4890700	4835300	4999100	C14767	ko00591
Lmbn005662	295.23	171.1	296.235	C18H32O3	[M-H]-	9(10)-EpOME;(9R,10S)-(12Z)-9,10-Epoxyoctadecenoic acid	Lipids	Free fatty acids	16833-56-0	1	136430	124420	182140	65879	72078	39668	155920	180580	284140	48171	64844	64665	103460	101050	165410	79013	77702	91208	728960	747520	733140	747610	729050	795530	721280	729500	C14825	ko00591,ko01100
Lmbn005369	295.23	195.14	296.235	C18H32O3	[M-H]-	13(S)-HODE;13(S)-Hydroxyoctadeca-9Z,11E-dienoic acid*	Lipids	Free fatty acids	10219-69-9	1	3062800	2742100	3334800	1182800	1234700	1345400	3328300	3604500	4242300	919420	1436800	1449600	1549700	1119300	1441700	1518100	1309500	1456300	4958300	4818800	4623100	4811400	4931100	5010300	4890500	4942000	C14762	ko00591
pmb2799	295.23	195.2	296.235	C18H32O3	[M-H]-	12,13-Epoxy-9-Octadecenoic Acid	Lipids	Free fatty acids	6799-85-5	1	9727.4	8186.6	9774	5152	10363	2148.1	9558.9	9607.1	9733	3776.2	7121.3	4479	5779.2	4640.8	4700.4	4108.4	7160.9	4684.6	22117	19503	15769	18284	15788	17489	18633	17451	C14826	ko00591,ko01100
pme1474	298.1	136	297.09	C11H15N5O3S	[M+H]+	5'-Deoxy-5'-(methylthio)adenosine	Nucleotides and derivatives	Nucleotides and derivatives	2457-80-9	1	35470000	34567000	37545000	30055000	27452000	26913000	36223000	41564000	40933000	34042000	32421000	39554000	25821000	24064000	26803000	40554000	39662000	39004000	31560000	31287000	32854000	31267000	34103000	35968000	34616000	32683000	C00170	ko00270,ko00908,ko01100
pmb0197	298.1	166.3	297.107	C11H15N5O5	[M+H]+	N7-Methylguanosine	Nucleotides and derivatives	Nucleotides and derivatives	20244-86-4	3	46707	55109	80093	443560	276410	208880	43281	48469	77460	52090	61839	83246	213990	172910	117970	38544	36890	42485	101670	95019	96610	103650	97770	127100	126190	122740	C20674	--
Lmbn009444	297.24	183.14	298.251	C18H34O3	[M-H]-	Ricinoleic acid	Lipids	Free fatty acids	141-22-0	2	170380	184390	180190	99479	110850	116490	223060	232900	214600	109640	123020	135740	99950	102670	135800	118180	139010	99422	122630	129480	128290	125950	128570	130100	130650	133560	C08365	--
pmf0297	297.32	183.1	298.324	C20H42O	[M-H]-	1-Eicosanol	Lipids	Free fatty acids	629-96-9	3	172660	184500	175740	101300	117680	118080	226030	219340	202860	111440	129580	133560	105950	94560	145320	108400	144390	98055	124240	127640	126170	130560	127840	133410	132110	122970	--	--
mws0724	298.08	208	299.087	C10H13N5O6	[M-H]-	8-Hydroxyguanosine	Nucleotides and derivatives	Nucleotides and derivatives	3868-31-3	2	57386	75356	57841	109820	103280	78167	47361	47969	77230	43438	48618	45293	55358	96391	74661	37399	28700	32222	51625	53108	31919	39657	46508	35444	44450	34558	--	--
ML10195036	300.3	60.05	299.282	C18H37NO2	[M+H]+	3-Dehydrosphinganine	Lipids	Sphingolipids	16105-69-4	3	3273.6	5189.3	5804.5	10000	6418.8	11861	5172.4	5511.9	9002	10838	9874.7	10959	14332	9487.1	9260.2	4876.7	7354.1	7569.2	12738	14472	16629	13430	17061	12830	12209	10169	C02934	ko00600,ko01100
MWSHY0126	301.07	258.05	300.063	C16H12O6	[M+H]+	Kaempferide (3,5,7-Trihydroxy-4'-methoxyflavone)	Flavonoids	Flavonols	491-54-3	2	247.51	309.31	308.98	235.46	320.81	747.74	410.35	240.54	415.34	1291.1	322.9	1229	2993.5	2025.1	810.46	901.01	804.94	322.34	4643.2	4643	4719	6711.5	5933.6	4820.3	4545.5	5234	C10098	ko00944
pmp000971	301.07	286.05	300.063	C16H12O6	[M+H]+	6-Demethoxy-7-methylcapillarisin	Others	Others	-	2	2589.9	9016.7	5672.6	3898.9	7330.4	7916.5	7458	2477	4116.2	29335	11626	41054	213220	98972	63564	72600	22468	13272	286280	301450	306060	293680	331670	335690	327890	327420	--	--
pmp000001	301.07	286.05	300.063	C16H12O6	[M+H]+	Hispidulin (5,7,4'-Trihydroxy-6-methoxyflavone)*	Flavonoids	Flavonoid	1447-88-7	3	23719	75326	54586	84961	135800	101030	87911	118740	32965	17417	6841.6	31714	10042	13518	11331	7639.3	6187.8	12059	76730	82291	77252	81356	84402	99157	75152	89337	C10058	--
pmp001127	301.07	286.08	300.063	C16H12O6	[M+H]+	Chrysoeriol	Flavonoids	Flavonoid	491-71-4	2	12110	30710	33427	11698	8399.6	13547	22611	10476	28367	395.74	218.13	3073.9	693.17	859.28	477.33	220.24	433.53	1199.6	25258	28050	29527	32447	30751	28246	29968	30609	C04293	ko00944
mws0058	299.06	284	300.063	C16H12O6	[M-H]-	Diosmetin (5,7,3'-Trihydroxy-4'-methoxyflavone)*	Flavonoids	Dihydroflavone	520-34-3	3	23310	12643	11073	18578	24993	18816	20886	14890	13728	13311	14836	30783	49221	34928	35106	14890	22030	13453	48521	53283	46705	48171	53630	50153	51394	50436	C10038	--
Zmhp003514	301.07	286.05	300.063	C16H12O6	[M+H]+	6,7,8-Tetrahydroxy-5-methoxyflavone	Flavonoids	Flavonoid	-	2	10993	30988	31711	11329	10343	8963.4	23299	10439	27787	187.52	1021.8	4195.9	457.51	1676.1	461.56	562.4	740.55	908.72	26711	30997	30201	27109	28126	25392	30869	24563	--	--
Zmhn001358	299.08	137.02	300.084	C13H16O8	[M-H]-	4-O-Glucosyl-4-hydroxybenzoic acid	Phenolic acids	Phenolic acids	-	1	80156	112720	92551	131740	115740	141770	171810	137850	144070	223650	251620	294520	398550	469390	415600	250140	263520	254160	265220	275840	267460	265880	283450	280470	283140	286450	--	--
Lmsn002247	299.08	137.02	300.085	C13H16O8	[M-H]-	1-O-Salicyloyl-β-D-glucose	Phenolic acids	Phenolic acids	60517-74-0	1	91161	112490	105150	152040	154940	146520	169740	140170	126880	256470	241030	290080	436050	460560	469100	270460	277260	274650	247820	268180	266070	303000	297240	312230	305270	312570	--	--
pmb3142	299.1	137.1	300.085	C13H16O8	[M-H]-	Salicylic acid-2-O-glucoside	Phenolic acids	Phenolic acids	10366-91-3	3	3441400	4115500	4309800	7516500	6620600	6899100	4516700	4661700	4751400	4259500	4905700	4403100	10850000	10739000	9800800	4991800	5197200	5000600	4449700	4591900	4665900	4343700	4707800	4617000	4996400	4981100	--	--
pme2816	301.2	209.2	300.209	C20H28O2	[M+H]+	4-Oxoretinol	Others	Vitamin	62702-55-0	2	9144.4	10833	7420.3	15849	13959	13857	12605	10930	12032	12120	12080	12549	16189	13301	14496	13779	16175	12965	10812	12678	10328	12228	9972.9	12253	12214	13524	C16683	--
Zmyn005384	299.26	253.26	300.266	C18H36O3	[M-H]-	2R-Hydroxyoctadecanoic Acid	Lipids	Free fatty acids	26633-48-7	1	15836	11843	10215	10913	14226	17104	15035	13940	16259	17451	13705	16569	8749.2	11594	13287	21502	19084	22060	17590	18383	17871	21770	17153	17307	19505	19286	C03042	--
MWS4295	299.26	253.25	300.266	C18H36O3	[M-H]-	DL-2-hydroxystearic acid	Lipids	Free fatty acids	629-22-1	2	14640	11448	11007	12278	14437	18736	16041	12989	15967	15972	15952	16855	9553.1	12085	12501	18191	20863	19420	15061	20066	16052	20135	14142	16323	18326	21439	--	--
MWS5235	299.26	253.25	300.266	C18H36O3	[M-H]-	12-Hydroxyoctadecanoic acid	Lipids	Free fatty acids	106-14-9	2	6619.5	7413.1	10436	9421.1	7777.6	4473.2	8480.2	9445.5	6269.5	9010.7	7485.7	11201	8375.1	7011.1	8670	10103	8381.3	8832.5	8887.6	10756	9266.8	8856.1	9925.6	9259	9493.8	11507	--	--
Lmqn008288	299.26	299.26	300.267	C18H36O3	[M-H]-	3-Hydroxyoctadecanoic Acid	Lipids	Free fatty acids	45261-96-9	2	273630	345000	363510	329690	583940	327880	315110	571260	342530	278250	293360	345740	2222000	325850	306870	279310	369660	361790	665760	591730	592400	639110	572960	619430	582010	645110	--	--
pmb3079	300.05	96.9	301.056	C8H16NO9P	[M-H]-	N-Acetyl-D-glucosamine-1-phosphate	Others	Saccharides and Alcohols	6866-69-9	3	74709	41455	50371	2849.8	5364	6954.8	85085	77007	88270	65378	88742	62392	1513	1794	10517	119660	163890	119710	62357	60916	59897	71595	54943	45719	71464	72814	C04256	--
pme2954	303.05	137.02	302.043	C15H10O7	[M+H]+	Quercetin	Flavonoids	Flavonols	117-39-5	1	273250	74940	67747	107980	195130	257310	250450	132660	95860	1152500	824280	1732000	2137500	1919200	1837900	1556700	1278900	1308600	596670	645990	674550	677710	691570	711130	679760	683670	C00389	ko00941,ko00944,ko01100,ko01110
mws0920	301.04	151	302.043	C15H10O7	[M-H]-	Tricetin (5,7,3',4',5'-Pentahydroxyflavone)	Flavonoids	Flavonoid	520-31-0	2	35211	3323.2	2760.3	18134	12291	8211	33472	65761	1918	821.21	647.28	3118.9	3240.7	6219.6	5224.3	2684.4	5991.9	6467.2	37899	28140	28219	35992	36605	37237	44917	37708	C10192	ko00941
Cmsp004086	303.09	229.08	302.079	C16H14O6	[M+H]+	Dihydrokaempferide	Flavonoids	Dihydroflavonol	137225-59-3	3	27313	17177	6558.8	52061	65446	63639	43004	2920	28519	206060	162190	135350	379260	341280	208230	194370	138940	137410	76782	187720	92451	106460	101340	120380	185850	172640	--	--
Zmhn000892	301.09	139.05	302.1	C13H18O8	[M-H]-	4-O-Glucosyl-3,4-dihydroxybenzyl alcohol	Phenolic acids	Phenolic acids	-	1	712630	708800	661790	1254600	1089100	1004900	780630	856080	810340	936720	977500	965570	1212700	1234700	1209900	782930	915910	796230	550510	573200	580850	596770	573010	573990	594310	575640	--	--
Lmbn014696	301.22	301.22	302.225	C20H30O2	[M-H]-	Pimaric acid	Terpenoids	Ditepenoids	127-27-5	1	311350	293950	384590	756730	359000	312250	448230	588880	596260	354510	303760	395070	5522600	349160	267950	292640	490970	490750	767270	551450	539810	660040	552410	520850	511590	592920	C09159	--
MWSslk208	301.22	301.22	302.225	C20H30O2	[M-H]-	Kaurenoic Acid	Terpenoids	Ditepenoids	6730-83-2	2	310150	292810	369940	797740	355240	290710	433550	563430	591080	353320	305180	364000	5346400	333420	235750	272890	464290	464140	723150	524590	479640	588020	538710	498100	455940	544750	C11874	ko00904,ko01100,ko01110
MWSmce549	303.25	57.07	302.246	C17H34O4	[M+H]+	1-Monomyristin	Lipids	Free fatty acids	589-68-4	3	1208700	965570	972080	1268700	1165800	1170800	839800	961530	1022900	1028500	883260	869070	1232300	1284200	1169200	967720	926890	935250	1065700	893020	914260	977620	1191100	1118800	1079800	1098900	--	--
mws0369	303.23	258.9	304.24	C20H32O2	[M-H]-	Arachidonic Acid	Lipids	Free fatty acids	506-32-1	1	325.64	1094	410.91	243.12	282.02	527.55	343.86	1919.7	437.55	802.77	699.43	796.54	641.55	199.56	949.65	1508.4	1043.1	895.54	6767.8	6968.7	9148.6	6526.7	7278.4	7614.6	7616.4	10226	C00219	ko00590,ko00591,ko01040,ko01100
Hmdn001963	305.03	273	306.038	C14H10O8	[M-H]-	Methyl Brevifolincarboxylate	Phenolic acids	Phenolic acids	154702-76-8	3	6069.2	1027.5	505.5	6629.8	2562	10695	5065.8	2583.2	520.75	14894	20390	20374	28522	25955	38467	21397	23474	23892	17414	29506	16869	20931	17420	20956	16859	18468	--	--
pme1086	306.08	143	307.084	C10H17N3O6S	[M-H]-	Glutathione reduced form	Amino acids and derivatives	Amino acids and derivatives	70-18-8	1	56790	59662	39828	58396	35217	50962	59088	76592	56521	60252	59018	50352	28370	32047	44140	3191.2	70688	73898	35895	38548	44500	52663	60860	45271	44160	46999	C00051	ko00270,ko00480,ko01100,ko02010
pmn001610	307.26	307.3	308.272	C20H36O2	[M-H]-	Eicosadienoic acid	Lipids	Free fatty acids	5598-38-9	1	19871	22688	11551	23774	27006	17315	35091	34381	45714	65185	59502	48110	50059	48798	48255	116590	90322	149310	104080	162370	118480	169330	95331	157430	108770	89143	C16525	ko01040
pmb2791	309.21	209.1	310.1	C18H30O4	[M-H]-	9-Hydroperoxy-10E,12,15Z-octadecatrienoic acid	Lipids	Free fatty acids	111004-08-1	3	52605	51902	62377	49168	44901	49304	68156	58959	83701	41014	38679	49041	58116	46211	41906	50748	44000	36348	35713	41178	42638	39324	38342	47733	37245	44246	C16321	ko00592,ko01110
Zmzn003953	309.2	227.2	310.214	C18H30O4	[M-H]-	13(s)-hydroperoxy-(9z,11e,15z)-octadecatrienoic acid	Lipids	Free fatty acids	67597-26-6	3	230300	162960	199290	200960	259030	244600	319620	332660	333110	637620	485360	590670	260010	229580	306750	433550	541990	541360	426250	410660	358920	444540	390550	404520	370590	397810	C04785	ko00592,ko01100,ko01110
Zmyn004449	309.21	171.1	310.214	C18H30O4	[M-H]-	9-Hydroxy-12-oxo-10(E),15(Z)-octadecadienoic acid	Lipids	Free fatty acids	-	2	3234.9	2535.2	3818.1	2090.4	3872.7	2512.3	2139.2	3222.2	2671.9	1774.9	2233.7	1343	888.09	223.51	1832.8	1359.9	2089.6	1153.6	14351	13245	13899	13393	15526	15229	16932	14462	C21923	ko00592,ko01110
Hmqp006221	311.26	279.32	310.25	C19H34O3	[M+H]+	13-Hydroxy-9Z,11E-octadecadienoic acid	Lipids	Free fatty acids	18104-45-5	3	381.23	329.34	407.77	258.83	270.92	557.73	191.26	419.93	617.54	51.49	206.82	163.79	224.37	404.74	62.06	130.35	198.98	168.24	16194	15776	18726	17689	16780	15181	14964	15671	--	--
pmn001606	309.28	309.28	310.287	C20H38O2	[M-H]-	Eicosenoic acid	Lipids	Free fatty acids	26764-41-0	2	681280	808190	591200	1034400	484710	466710	1584100	576580	637550	1623700	525920	710510	395180	321610	339190	413410	732850	1043700	14349	15540	9290.1	9955.8	14127	13595	14059	8832.1	C16526	ko01040
Lmap001823	312.11	132.04	311.101	C14H17NO7	[M+H]+	Dhurrin	Alkaloids	Phenolamine	499-20-7	1	1208100	1886700	2593700	2911900	3005000	2885300	1490800	2194700	1931700	1946400	2639800	3038100	1769300	1682200	1745700	2823500	1986300	1634000	1535100	1036200	1303200	1532600	1693800	1480400	1926900	1364500	C05143	ko00460,ko01100,ko01110
pme3967	312.13	180	311.123	C12H17N5O5	[M+H]+	2-(Dimethylamino)guanosine	Nucleotides and derivatives	Nucleotides and derivatives	2140-67-2	1	143480	193330	205510	551980	426770	322950	156860	187820	168480	232820	186010	344530	359400	300780	228130	175270	115000	150820	329580	305040	336660	332490	369910	376040	349410	362590	--	--
Lmcp002302	312.13	180.09	311.123	C12H17N5O5	[M+H]+	N6-(2-Hydroxyethyl)adenosine	Nucleotides and derivatives	Nucleotides and derivatives	4338-48-1	1	167630	197440	222310	563790	450380	342730	165330	193410	206970	251760	198450	322420	414920	293850	246510	177500	132240	141590	337410	367760	313660	315090	378720	361240	377030	386160	--	--
MWSHY0047	313.11	269.08	312.1	C18H16O5	[M+H]+	5,7,4'-Trimethoxyflavone	Flavonoids	Flavonoid	5631-70-9	2	438.99	244.49	177.87	351.59	868.3	613.91	298.85	333.97	254.79	347.96	321.68	1365.2	336.76	527.73	256.16	310.59	624.72	351.77	9052.3	12007	12881	11742	15079	12467	11947	13335	--	--
Lmcp005089	313.11	121.07	312.1	C18H16O5	[M+H]+	6,8-Dihydroxy-2-[2-(4-methoxyphenyl)ethyl]chromone	Others	Others	-	3	3603.6	24507	4171.3	1664.3	3110.5	3182.6	5537.3	7893.2	109590	2815.7	3062.1	18803	2716.6	1452	1178.7	17657	6642.6	6132.9	73904	90827	91613	86948	104500	103160	97646	105670	--	--
MWSslk182	313.11	283.07	312.1	C18H16O5	[M+H]+	5,6,7-Trimethoxyflavone	Flavonoids	Flavonoid	973-67-1	2	299.77	166.53	781.65	361.05	263.91	304.53	167.06	86.45	432.81	438.88	446.51	2050.8	177.51	91.865	810.67	854.45	253.18	91.058	21230	21537	24128	16972	24326	24424	19067	21404	--	--
mws0636	313.15	166	312.147	C18H20N2O3	[M+H]+	L-Phenylalanyl-L-phenylalanine	Amino acids and derivatives	Amino acids and derivatives	2577-40-4	1	46908	51012	60628	135620	103350	96713	34397	45520	39556	64955	30039	51608	63808	95780	73874	66176	32049	59054	83869	79888	80026	80754	85504	80551	71728	72240	--	--
pmb2804	311.1	171.3	312.23	C18H32O4	[M-H]-	13S-Hydroperoxy-9Z,11E-octadecadienoic acid	Lipids	Free fatty acids	33964-75-9	3	95002	107670	102540	43263	52297	50334	134730	150770	168780	45506	66056	73203	83624	56347	72696	77286	72725	67434	177730	183210	188420	190500	188680	173480	177810	174980	C04717	ko00591,ko01100
MWS80006	311.22	293.21	312.23	C18H32O4	[M-H]-	9-Hydroperoxy-9Z,11E-Octadecadienoic Acid	Lipids	Free fatty acids	5502-91-0	3	25993	21858	27342	20003	20338	15061	17843	19101	20605	19026	14448	12542	21056	18286	24584	9838.4	10492	12652	25935	24100	21667	26153	22708	22196	31419	18496	C14827	ko00591,ko01100
pmn001689	311.22	223.17	312.23	C18H32O4	[M-H]-	9-Hydroxy-12-oxo-15(Z)-octadecenoic acid	Lipids	Free fatty acids	-	2	84614	88544	88167	171540	166000	171060	112930	122430	152860	77141	94444	145460	176780	174650	188490	71182	74985	69258	131350	139210	134010	136770	138160	145330	149770	152870	C21924	ko00592,ko01110
Lmbn005287	311.22	249.22	312.23	C18H32O4	[M-H]-	7S,8S-DiHODE; (9Z,12Z)-(7S,8S)-Dihydroxyoctadeca-9,12-dienoic acid	Lipids	Free fatty acids	143288-65-7	1	178170	148050	184040	159390	131310	168940	119660	152610	150280	117450	170680	156030	188230	148060	153340	154890	161410	147410	166090	168860	166000	173870	164600	171370	178720	167230	C07354	ko00591
Lmbn004685	311.22	223.17	312.23	C18H32O4	[M-H]-	5S,8R-DiHODE; (5S,8R,9Z,12Z)-5,8-Dihydroxyoctadeca-9,12-dienoate	Lipids	Free fatty acids	-	2	23074	25270	23957	24301	26767	25099	21515	18018	25786	19180	24227	22097	32777	23260	13017	24207	16346	15459	12318	9738.1	13896	13821	10174	13786	9845.1	12033	C20186	ko00591
Rfmb087	311.22	293.21	312.23	C18H32O4	[M-H]-	9-Hydroxy-13-oxo-10-octadecenoic Acid	Lipids	Free fatty acids	-	1	172150	179890	174900	49855	53678	63593	205120	214720	159400	102870	112360	142180	76561	75422	67898	165370	97582	134090	263900	286990	298340	325740	301720	313220	300060	295830	--	--
pmf0397	311.3	183.1	312.303	C20H40O2	[M-H]-	Arachidic acid	Lipids	Free fatty acids	506-30-9	3	22945	23316	18251	14910	9072.3	12031	21008	13715	18327	8586.9	3958.4	10592	10919	13748	21356	19294	16237	22716	54547	19716	24159	19777	16951	15579	29321	27554	C06425	ko01040
Lmyp001375	314.09	152.03	313.08	C13H15NO8	[M+H]+	BOA-6-O-glucoside	Alkaloids	Alkaloids	-	2	86261	38974	43614	71732	70000	66358	105130	29510	41662	53525	58389	51629	27553	27962	37769	30276	38033	38529	37731	49223	51578	45402	47220	49135	44605	42450	--	--
mws1433	314.14	177.05	313.131	C18H19NO4	[M+H]+	N-Feruloyltyramine	Alkaloids	Phenolamine	66648-43-9	1	1084400	2080300	1095500	1231600	1189000	563450	1208200	1279800	6383600	555860	790790	2330900	1275800	582430	1450300	2882300	1210200	938900	4469900	5024400	4956100	4946300	5245700	5040400	4944000	4921300	C02717	--
MWStz221	314.14	177.06	313.131	C18H19NO4	[M+H]+	N-Cis-Feruloyltyramine	Alkaloids	Phenolamine	80510-09-4	1	1263800	2182300	1151000	1359200	1302300	647500	1307200	1350000	6769400	586250	818310	2486300	1363400	620890	1505400	3181100	1292900	1039700	4795000	5127200	5478700	5072400	5324800	5205800	5299200	4966800	--	--
mws1174	313.07	253	314.079	C17H14O6	[M-H]-	3-O-Acetylpinobanksin	Flavonoids	Dihydroflavonol	52117-69-8	1	156390	228120	170220	143150	198180	114340	845300	484160	291380	1287900	210980	114970	178500	104710	296320	135050	1992600	168730	166490	178590	165390	165150	176890	164770	185580	172990	C16418	ko00941
Lmmn002179	313.09	107.05	314.1	C14H18O8	[M-H]-	Methyl salicylate-2-O-glucoside	Phenolic acids	Phenolic acids	10019-60-0	2	229610	207940	208010	175000	186670	201320	195910	220320	221970	234670	252010	272430	243710	269900	274790	236510	306400	255420	215640	236100	260460	212580	257620	258170	246290	251390	--	--
Lmbn005822	313.24	223.21	314.246	C18H34O4	[M-H]-	9,10-DHOME; (12Z)-9,10-Dihydroxyoctadec-12-enoic acid	Lipids	Free fatty acids	263399-34-4	3	628.56	1140.5	1275.5	357.67	85.145	756.07	171.78	268.51	734.87	484.36	652.82	473.93	1685.6	1517.7	841.3	417.57	189.49	1005.5	1646.7	1335.1	1299.5	1160.5	955.35	1087.3	887.64	1021.5	C14828	ko00591
Lmbn005487	313.24	251.24	314.246	C18H34O4	[M-H]-	12,13-DHOME; (9Z)-12,13-Dihydroxyoctadec-9-enoic acid	Lipids	Free fatty acids	263399-35-5	1	30556	29699	34769	30283	34510	40352	32111	31840	32065	37654	43438	38746	39664	41262	34682	35539	35117	31042	73567	69791	72227	70744	71874	69126	69008	74170	C14829	ko00591
Lmbn007891	313.24	183.14	314.246	C18H34O4	[M-H]-	Hydroxy ricinoleic acid	Lipids	Free fatty acids	-	3	54566	50749	64552	58314	65645	54839	52905	65783	76722	39940	39567	72863	77036	89506	83085	35981	29368	32531	172760	177190	174110	189340	186100	177160	180620	185670	--	--
Lmqn004838	315.01	299.99	316.022	C15H8O8	[M-H]-	3-O-Methylellagic acid	Tannins	Tannin	-	2	1787.2	445.68	678.07	567	891.97	820.21	894.22	560.66	452.3	4245.8	3899.7	5875.7	4471.8	6250.6	1349.3	3908.4	1886.5	10161	15658	24990	22901	16125	20440	16308	20622	18219	--	--
Zmzp004111	317.06	302.04	316.058	C16H12O7	[M+H]+	Selagin	Flavonoids	Flavonoid	-	2	5916.5	20784	15210	17687	13468	30270	14448	22908	14637	50318	32473	97422	183660	357460	730680	91208	59106	71515	96422	56167	123440	83348	62296	82855	65834	60217	--	--
mws0988	315.05	165	316.058	C16H12O7	[M-H]-	Rhamnetin	Flavonoids	Flavonols	90-19-7	1	7132.7	6492.4	3112.2	7658.4	16670	19513	22299	10817	3974.7	54887	8267.1	108640	25589	11646	4845.3	3533.6	31941	31985	17230	24467	19645	21495	19510	22778	20996	20120	C10176	--
MWSHY0068	317.07	274.05	316.058	C16H12O7	[M+H]+	Isorhamnetin	Flavonoids	Flavonols	480-19-3	1	80667	17510	16062	35232	70418	109760	55719	29528	27658	352980	305160	662340	1098300	1070900	577230	458300	344840	352190	202180	249520	239210	243600	250970	260180	258500	262920	C10084	--
Zmzp006646	317.07	302.04	316.058	C16H12O7	[M+H]+	Capillarisin	Others	Others	56365-38-9	1	450170	112640	107210	220670	407140	736100	343930	183650	183700	2035000	1833600	3805600	6207900	6510200	3498200	2733300	2101000	2131400	1330100	1454100	1526200	1384700	1582700	1565500	1507400	1501700	C08999	--
Lmmn004912	315.05	271.02	316.058	C16H12O7	[M-H]-	3-O-Methylquercetin	Flavonoids	Flavonols	1486-70-0	2	8988.2	6506.4	7925.7	11158	12422	12788	10977	11737	7685.4	19240	18002	27818	19143	23249	19538	19057	20266	17445	11005	11976	14941	18355	10442	12865	12492	13999	C04443	ko00944
Lmfp001509	317.09	153.02	316.079	C13H16O9	[M+H]+	1-O-Galloyl-rhamnose	Tannins	Tannin	-	3	13112	9190.9	2036.7	9089.8	13285	6351.1	10118	8069.9	10166	29799	34199	33254	31372	61766	26312	52812	86344	59421	28213	32260	23329	26350	32023	41886	33995	31566	--	--
pmb2871	315.07	153	316.079	C13H16O9	[M-H]-	1-O-Gentisoyl-D-glucoside*	Phenolic acids	Phenolic acids	23445-11-6	1	787220	906870	970520	1285400	1361700	994730	955090	970710	880960	1103200	841240	1105900	1713400	1696200	1694000	1007900	996690	825510	795590	996450	824200	888940	931960	924710	901850	936040	--	--
pmn001367	315.07	153.02	316.079	C13H16O9	[M-H]-	Protocatechuic acid-4-O-glucoside*	Phenolic acids	Phenolic acids	-	1	354830	152530	78847	293530	309630	262810	237350	203070	149220	63619	164130	292100	354240	230730	400740	140440	84736	232570	242660	197340	193860	298160	188990	199810	247850	213840	--	--
Hmtn001120	315.11	153.06	316.116	C14H20O8	[M-H]-	5-(2-Hydroxyethyl)-2-O-glucosylphenol	Phenolic acids	Phenolic acids	-	1	284840	309570	326510	1234800	1287300	941440	322420	320100	289070	425590	357200	390040	1443200	1616900	942080	210360	293820	237060	365130	406040	460370	410750	385850	393650	412940	403140	--	--
Zmtn001661	315.11	153.02	316.116	C14H20O8	[M-H]-	Vanilloloside	Phenolic acids	Phenolic acids	74950-96-2	2	171930	94464	150620	285870	281420	260890	205890	279430	309920	104140	229900	242750	191380	380740	440850	167090	185410	236810	224560	192430	241200	224910	203570	216600	131380	229640	--	--
mws0582	322.11	130	321.099	C11H19N3O6S	[M+H]+	S-(Methyl)glutathione	Amino acids and derivatives	Amino acids and derivatives	2922-56-7	1	34187	47499	60226	62721	79460	60584	54979	50560	54284	53128	69944	72275	30183	23033	26550	64129	108360	86987	50461	53925	65123	53907	54604	67959	57576	66135	C11347	--
MWSslk257	324.06	112.05	323.052	C9H14N3O8P	[M+H]+	Cytidine 5'-monophosphate(Cytidylic acid)	Nucleotides and derivatives	Nucleotides and derivatives	63-37-6	3	189740	290890	268990	638640	691430	1074400	241680	264850	203380	213180	264570	464180	806040	697980	821760	202080	156300	257350	380370	462910	397370	401130	451430	470660	477100	440120	C00055	ko00240,ko01100
pme3188	323.03	211	324.036	C9H13N2O9P	[M-H]-	Uridine 5'-monophosphate	Nucleotides and derivatives	Nucleotides and derivatives	58-97-9	1	849270	2667600	2229900	4401500	4170600	5483500	1330400	1009600	1317200	1213100	2471000	3646000	3899900	5128300	5890500	493510	272910	321340	2668100	2267800	2949000	2426000	3098700	2693600	3246200	2576500	C00105	ko00240,ko01100
Hmqp006023	326.27	309.27	324.266	C20H36O3	[M+H]+	Ethyl 9-Hydroxy-10,12-octadecadienoic acid	Lipids	Free fatty acids	-	3	12428	11253	18410	14096	13579	13922	18678	16626	18789	10154	21609	11502	25731	5071.2	32737	22779	21520	19526	32078	31898	33769	32011	34625	34275	32080	33040	--	--
mws0983	326.31	62.06	325.298	C20H39NO2	[M+H]+	N-Oleoylethanolamine	Alkaloids	Alkaloids	111-58-0	1	116380	103650	174830	137860	118880	140100	186750	139270	165830	105690	206350	127490	226420	50193	337800	216540	201280	166950	300180	306150	313740	326790	316120	307840	317130	320490	C20792	--
Lmsn003111	325.09	145.03	326.1	C15H18O8	[M-H]-	1-O-p-Coumaroyl-β-D-glucose	Phenolic acids	Phenolic acids	7139-64-2	1	1214600	1585300	1086900	4088300	5968400	2828200	2284500	1366800	1589300	4826300	3330900	4643300	8105200	6887300	7516800	4704200	5636800	3864400	8266400	9018000	8641300	9308600	6952300	8082400	8774300	8228300	C16827	--
Zmzn001549	325.09	119.05	326.1	C15H18O8	[M-H]-	Ferulic acid-1-O-glucoside	Phenolic acids	Phenolic acids	14364-05-7	2	33062000	33103000	36354000	44009000	42252000	44042000	39197000	34679000	36461000	36119000	40935000	43295000	44986000	47165000	44097000	38436000	38504000	36070000	29955000	31816000	29320000	31361000	32371000	31062000	32055000	36264000	C04415	--
Zmhn002301	325.09	163.04	326.1	C15H18O8	[M-H]-	p-Coumaric acid-4-O-glucoside	Phenolic acids	Phenolic acids	117405-48-8	1	28348000	29536000	27619000	36943000	35789000	35034000	31423000	30514000	31504000	34985000	37247000	35706000	40279000	39539000	36934000	33090000	34613000	33677000	25839000	26419000	26323000	26039000	26673000	27454000	28679000	27244000	C06739	--
Lmqn000351	325.11	59.01	326.121	C12H22O10	[M-H]-	Rutinose	Others	Saccharides and Alcohols	90-74-4	3	106210	208770	159350	159840	134140	179890	134080	113730	76308	148120	117190	129080	125090	152780	111380	61738	38312	58778	96118	73210	74318	87398	90035	96117	82734	81984	C08247	--
MWSmce278	327.19	159.08	326.188	C21H26O3	[M+H]+	Acitretin	Others	Vitamin	55079-83-9	2	9314.8	4849.1	3495.9	5601.6	7272	6139.9	4837	6624.5	7734.9	5630.4	6934.3	4858.6	7978.2	17224	12061	6671.7	6722.1	3886.8	5761.5	7679.8	5577.3	7119.6	7623.3	8549.8	8635.2	7888.2	--	--
Lmtn002233	327.11	165.05	328.116	C15H20O8	[M-H]-	Androsin	Phenolic acids	Phenolic acids	531-28-2	2	330100	308950	372900	494850	392550	422790	328540	355150	370800	370290	383990	421190	447790	530790	433760	338240	372340	344670	308440	285950	303090	289650	290240	257930	322180	327150	--	--
pmn001690	327.14	165.09	328.152	C16H24O7	[M-H]-	3-Hydroxy-4-isopropylbenzylalcohol-3-O-glucoside	Phenolic acids	Phenolic acids	-	2	161500	209720	219230	105110	133150	143700	167530	205350	197670	126590	104630	114400	66846	81141	71694	106200	79597	85426	63736	73896	74686	56836	56608	72954	71593	71902	--	--
pmn001691	327.22	291.2	328.225	C18H32O5	[M-H]-	9,12,13-Trihydroxy-10,15-octadecadienoic acid	Lipids	Free fatty acids	-	1	1070200	1077100	1116400	237860	272080	344080	1606900	1939000	2400100	767820	766380	672110	676740	515160	910020	1270300	981460	1026300	923450	972780	879500	994860	972000	975880	966590	1023400	--	--
mws0371	327.23	283.3	328.24	C22H32O2	[M-H]-	Cis-4,7,10,13,16,19-Docosahexaenoic Acid	Lipids	Free fatty acids	6217-54-5	3	1683.7	1316.6	3329.9	1204.9	1083.7	2277.4	2796.1	2846.2	2826.5	2879.5	5298.3	3548.8	1582.9	1553	2197.7	4685.6	4502.8	4478.9	2698.7	3907.4	3200.4	2452.2	4543.6	3153.9	3254.2	3758.6	C06429	ko01040
mws0884	328.05	134.2	329.053	C10H12N5O6P	[M-H]-	Cyclic 3',5'-Adenylic acid	Nucleotides and derivatives	Nucleotides and derivatives	60-92-4	1	1278000	1405600	1445700	1453300	1345400	1473200	1454700	1561100	1585700	1093200	1348600	1267500	607000	535190	864540	1245400	1135700	1123300	860980	870690	964550	952460	934640	972800	998220	982050	C00575	ko00230,ko01100
MWStz208	330.13	177.06	329.126	C18H19NO5	[M+H]+	N-Feruloyloctopamine	Alkaloids	Phenolamine	66648-44-0	2	111310	114980	211990	267210	279730	123360	151140	127990	113340	124850	110280	134970	250300	214040	169880	144350	63094	114850	124140	133590	156070	161320	152660	155410	151240	141400	--	--
Zmlp005013	331.04	299.02	330.038	C16H10O8	[M+H]+	3,3'-O-Dimethylellagic Acid	Tannins	Tannin	2239-88-5	3	5477.4	6331.1	6678.3	3363.3	5538.6	3094	9769.8	6199.2	10692	9475.5	7525.6	9927.7	8253.3	7824.6	6968.4	7822.7	9929.8	8758.4	6844.2	6491.9	6310.8	6272.3	3753.1	7744.4	6503.6	7397.1	--	--
Lmtn002565	329.11	167.03	330.095	C14H18O9	[M-H]-	1-O-Vanilloyl-D-Glucose	Phenolic acids	Phenolic acids	-	1	198090	256120	229270	355270	309450	367880	245950	203270	237810	221360	173470	300480	454740	424800	523600	213440	181750	196480	418020	437620	476970	480650	454690	426800	469250	428010	C20470	--
Smhn002346	329.08	167.03	330.095	C14H18O9	[M-H]-	2,4,6-trihydroxyacetophenone-6-O-glucoside	Phenolic acids	Phenolic acids	-	1	2355400	2157900	2450000	1706400	1623000	1619300	2023100	2574600	2301800	2142800	1927400	1667100	2270300	2584300	2769800	2355300	1907000	2259000	2437800	2704200	2683500	2697600	2770700	2764300	2781900	2803900	--	--
Zmhn001883	329.09	209.04	330.095	C14H18O9	[M-H]-	Vanillic acid-4-O-glucoside	Phenolic acids	Phenolic acids	32142-31-7	1	31449	29836	27120	25898	27866	24066	39231	34058	32754	73453	110450	56615	82058	70798	67286	95752	88561	105760	58238	50120	58404	65538	60215	54929	43115	53385	--	--
Hmqn003054	329.23	311.23	330.24	C18H34O5	[M-H]-	9,10,11-Trihydroxy-12-octadecenoic acid	Lipids	Free fatty acids	61911-67-9	1	372440	338410	375350	89973	92048	101460	447210	499410	554120	191910	207080	227710	193960	143500	189280	285210	259860	305200	419930	391790	391140	409650	403790	417700	397690	411850	--	--
Lmbn004240	329.23	199.13	330.241	C18H34O5	[M-H]-	9,10-Dihydroxy-12,13-epoxyoctadecanoic acid	Lipids	Free fatty acids	-	2	8758.4	4775.6	4702.1	14352	7811.9	7455.8	5177.7	6741.2	10250	1465.3	1345.1	603.84	2600.5	2666.6	3524	1107.3	278.66	1863.2	24332	26430	25700	23657	26850	22576	23027	24072	C14837	ko00591
pmn001694	329.23	229.15	330.241	C18H34O5	[M-H]-	9,10,13-Trihydroxy-11-Octadecenoic Acid	Lipids	Free fatty acids	29907-57-1	1	6518700	5893300	6371200	1396900	1516600	1640100	6878400	8800200	8960100	3389600	3488700	3683600	3135800	2290300	3114500	4764600	4227300	5293100	6553100	6318100	6259400	6675800	6598800	6610900	6572800	6104800	C14835	ko00591
Lmbn003970	329.23	211.14	330.241	C18H34O5	[M-H]-	9,12,13-TriHOME; 9(S),12(S),13(S)-Trihydroxy-10(E)-octadecenoic acid	Lipids	Free fatty acids	97134-11-7	2	115930	143180	171050	91338	72357	74824	165430	226190	249550	50550	61338	72907	97391	67806	95341	71970	53591	50922	209250	207740	221650	212000	235300	218000	192260	210490	C14833	ko00591
pmp001284	331.28	313.27	330.277	C19H38O4	[M+H]+	Monopalmitin	Lipids	Glycerol ester	542-44-9	1	324550	293510	270720	292690	316200	325540	301220	237360	341970	297160	310530	281750	306430	317090	279380	327290	277890	309630	319410	313120	325550	288610	334700	342300	325430	338790	--	--
pme3184	332.08	136	331.068	C10H14N5O6P	[M+H]+	2'-Deoxyadenosine-5'-monophosphate	Nucleotides and derivatives	Nucleotides and derivatives	653-63-4	2	271640	232050	265620	106820	104600	107090	265440	272840	298710	173210	247340	215140	96997	117260	97542	275150	367520	259180	142280	211150	191460	292210	169250	165530	218260	183430	C00360	ko00230,ko01100
pmb0789	332.13	152.07	331.127	C14H21NO8	[M+H]+	Pyridoxine-5'-O-glucoside	Others	Vitamin	-	3	131600	108720	101710	187740	206490	178720	136130	147900	160600	117760	167180	119380	204790	233840	232860	128580	161640	158990	135320	127980	137100	120310	144080	166370	156790	154840	C03996	--
pmc0066	333.05	137.05	332.052	C10H13N4O7P	[M+H]+	2'-Deoxyinosine-5'-monophosphate	Nucleotides and derivatives	Nucleotides and derivatives	3393-18-8	3	13005000	14804000	14712000	12577000	13632000	13014000	14689000	13910000	13864000	14929000	14409000	14093000	23621000	16520000	12898000	12939000	10777000	13900000	11206000	11243000	11711000	11953000	11352000	11684000	10987000	12449000	C06196	ko00230
pmn001518	331.07	169.01	332.074	C13H16O10	[M-H]-	1-O-Galloyl-D-glucose	Tannins	Tannin	58511-73-2	2	725150	750540	757760	636280	646190	735290	738540	645290	679500	801040	760350	921030	1000500	1053800	780500	787890	886380	724160	562740	633210	630690	577600	562350	567180	597150	494480	C01158	--
Lmyn007622	331.25	157.12	332.256	C18H36O5	[M-H]-	9,10,18-Trihydroxystearic acid	Lipids	Free fatty acids	496-86-6	1	27011	25024	37719	33792	28569	29587	30018	25717	29670	21755	24473	21127	30427	24421	25765	24626	25197	19874	23473	23006	24179	27531	23667	22253	25731	24816	C19621	ko00073
MWS2426	332.13	203.08	333.132	C16H19N3O5	[M-H]-	Tryptophan glutamic acid	Amino acids and derivatives	Amino acids and derivatives	36099-95-3	3	22639	26876	30012	16051	10942	13582	24140	35143	32908	13333	13861	21064	16822	9433.7	17317	37201	16208	32018	19535	21778	27070	21725	19573	13613	23359	18931	--	--
mws0675	335.06	123	334.057	C11H15N2O8P	[M+H]+	β-Nicotinamide mononucleotide	Nucleotides and derivatives	Nucleotides and derivatives	1094-61-7	1	1233600	1649000	1621600	925970	885650	1149200	1665000	1798100	2156800	1328100	1838200	1837200	560170	1192400	800000	1529800	1435700	1603400	1001900	987300	1009300	1166900	1120700	1319700	1138000	1266800	C00455	ko00760,ko01100
MWStz294	337.15	177.05	336.147	C20H20N2O3	[M+H]+	N-Feruloyltryptamine	Alkaloids	Plumerane	53905-13-8	1	110000	150850	159790	1632300	1002900	629420	217660	157740	237870	85402	378490	641890	1126800	393200	428170	395950	468160	85878	1529200	1622700	1818600	1871300	1744400	1727700	1739200	1743000	--	--
Cmhp005227	339.11	177.05	338.1	C16H18O8	[M+H]+	4,8-Dihydroxy Naphthol-1-O-glucoside	Quinones	Quinones	-	1	38449	16669	17009	27373	67333	26477	24293	46228	60070	18981	26752	23868	49697	36758	22176	26744	30826	23103	50444	48223	71846	62790	61395	47380	58453	62530	--	--
MWS2673	339.25	121.1	338.246	C20H34O4	[M+H]+	5,6-DiHETrE [5,6-dihydroxy-8Z,11Z,14Z-eicosatrienoic acid]	Lipids	Free fatty acids	213382-49-1	3	4327.4	9830	7746.1	49859	24791	40678	892.95	6115.2	10236	12964	19103	13788	39290	30302	65296	14553	5479.1	10136	16429	17601	18703	14558	20977	21224	14678	15588	C14772	ko00590,ko01100
pme3311	339	97	339.996	C6H14O12P2	[M-H]-	D-Fructose-1,6-biphosphate	Others	Saccharides and Alcohols	488-69-7	3	50652	14700	20670	8277.9	7622.6	12443	30573	24502	15089	42279	48458	23786	13766	6406	6880.1	63506	40506	55611	20915	29579	32153	22046	19443	21564	16321	24989	C00354	ko00400,ko00710,ko01100,ko01110,ko01200
Zmyn000083	338.99	78.96	339.996	C6H14O12P2	[M-H]-	D-Glucose 1,6-bisphosphate	Others	Saccharides and Alcohols	10139-18-1	3	37973	26192	27234	717.06	1720.6	2872.5	30651	15356	30687	41542	32909	24368	4273.8	2564.7	7128.5	45552	39906	51331	14281	19627	13383	19154	18820	21843	19067	22175	C01231	ko00500,ko01100
Cmyn001328	339.07	177.02	340.079	C15H16O9	[M-H]-	Daphnin	Lignans and Coumarins	Coumarins	486-55-5	1	2970500	1956400	2453000	3442400	3737300	3124900	2815600	2680300	2724600	2126900	2211400	2139000	1900300	2457300	2441700	1416900	2005600	1847800	995930	1457600	1778700	1498800	1654500	1492100	1669200	1478100	C01421	--
mws1015	339.07	177	340.079	C15H16O9	[M-H]-	Esculin (6,7-DihydroxyCoumarin-6-glucoside)	Lignans and Coumarins	Coumarins	531-75-9	1	1698700	1194400	1214300	2188300	2246400	2098600	1492400	1373800	1465800	1037000	1364800	1435700	1271600	1490500	1462300	960340	1120900	1217600	870630	937930	842050	785350	1036800	1050500	913930	803770	C09264	--
pmf0400	339.33	183.2	340.334	C22H44O2	[M-H]-	Docosanoic acid (Behenic acid)	Lipids	Free fatty acids	112-85-6	3	51616	41792	38500	39085	39861	44555	48307	32514	83684	47453	44013	27733	21775	22039	34189	29866	20531	28965	34895	25396	23156	27790	34952	42429	28240	21880	C08281	ko00073,ko01040
Jmwn002620	341.09	161.02	342.095	C15H18O9	[M-H]-	Vanillic Acid-4-O-Glucuronide	Phenolic acids	Phenolic acids	-	1	839000	836020	513240	1087500	1603100	1219800	1507400	799530	602090	2575900	3033500	2999500	2106500	2785600	3300000	3208200	4149500	3718800	2446100	2558900	2954200	2878900	2444800	2746600	2763100	2658200	--	--
Lmsn002548	341.09	161.02	342.095	C15H18O9	[M-H]-	1-O-Caffeoyl-β-D-glucose	Phenolic acids	Phenolic acids	14364-08-0	1	819100	730290	527430	1001300	1474300	1400400	1672500	698120	753220	2743000	2953200	2562200	2133000	2737700	3450400	3074100	4231500	3767900	2558200	2594000	2771900	2803700	2749600	2786700	2684500	2765600	C10433	--
Zmhn001793	341.09	179.03	342.096	C15H18O9	[M-H]-	6-O-Caffeoyl-D-glucose	Phenolic acids	Phenolic acids	-	2	31889000	31096000	36318000	40946000	37184000	38626000	38364000	35979000	34526000	29098000	28510000	30538000	34716000	38672000	33772000	32989000	29064000	31155000	22857000	24419000	25721000	24858000	24609000	23355000	25410000	23536000	--	--
Lmcp004714	343.12	137.06	342.11	C19H18O6	[M+H]+	6-Hydroxy-7-Methoxy-2-[2-(3'-Hydroxy-4'-Methoxyphenyl)Ethyl]Chromone	Others	Others	-	3	7764.4	7759.9	4797.7	5290	5976.7	3738.5	2056.8	6056.1	4166	2148	2865.7	4880.4	6304.5	7568.8	4374.3	6368.9	1831.9	842.66	4930.7	5539.4	4498	7101.4	5116.3	4842.1	5524.7	6049.2	--	--
pme0519	341.11	119.03	342.116	C12H22O11	[M-H]-	D-Sucrose*	Others	Saccharides and Alcohols	57-50-1	1	299670	462960	330490	209430	225450	154820	439660	279320	285350	331130	311930	660240	84388	163180	171730	292770	503650	340600	137600	277970	186200	164720	130610	185320	144390	235360	C00089	ko00052,ko00500,ko01100,ko01110,ko02010
mws1333	341.11	113	342.116	C12H22O11	[M-H]-	Melibiose	Others	Saccharides and Alcohols	585-99-9	1	165160	315670	160310	86941	165550	130270	250250	274970	171020	239450	274600	284730	62591	108690	78126	123050	146530	151440	123470	64288	126210	111200	118060	209920	128150	113520	C05402	ko00052,ko01100,ko02010
mws5038	341.11	89.02	342.116	C12H22O11	[M-H]-	Isomaltulose*	Others	Saccharides and Alcohols	13718-94-0	1	257950	445930	489320	99299	235970	327720	384730	228780	327570	375930	336050	477770	22344	116180	133620	296850	355720	472340	185200	169720	95897	145850	182560	91902	143020	156880	C01742	--
mws1080	341.11	179	342.116	C12H22O11	[M-H]-	Galactinol	Others	Saccharides and Alcohols	3687-64-7	1	468160	453650	376780	392970	449560	647150	1595900	707330	656350	984430	637810	883980	164190	330760	665570	480410	887600	954440	398360	412490	400560	376910	416520	498010	479890	512670	C01235	ko00052,ko01100
Lmsn000381	341.11	89.02	342.116	C12H22O11	[M-H]-	D-Maltose*	Others	Saccharides and Alcohols	133-99-3	1	203040	489510	419140	163640	165730	34970	308890	272010	227600	319360	326700	828830	17391	210090	122280	340330	395870	432410	130540	213460	137320	184150	122380	112390	61400	137790	C01971	--
MA10039641	341.11	89.02	342.116	C12H22O11	[M-H]-	Lactobiose	Others	Saccharides and Alcohols	63-42-3	1	247240	601630	485430	107400	139590	198280	591350	393300	175590	302760	276440	612400	7272	134950	247960	127510	621200	662860	171870	360320	150120	132810	165630	317430	213090	232550	C00243	ko00052,ko01100,ko02010
mws0264	341.11	119	342.116	C12H22O11	[M-H]-	D-Trehalose*	Others	Saccharides and Alcohols	99-20-7	1	160480	319060	208710	141990	118640	159570	225420	163230	106290	265730	172280	403820	19149	114660	119800	158740	256770	159540	100180	201220	86445	89029	102030	88990	101640	187060	C01083	ko00500,ko01100,ko01110,ko02010
mws0906	341.12	179	342.131	C16H22O8	[M-H]-	Coniferin	Phenolic acids	Phenolic acids	531-29-3	2	992790	975310	961580	1390900	1372900	1148300	1208600	1081800	1062800	927200	901250	879750	1213900	1336900	1088500	879810	946980	945750	647520	735500	677910	693120	677800	679910	708740	690880	C00761	ko00940
HJAP050	344.15	177.05	343.142	C19H21NO5	[M+H]+	N-Feruloyl-3-methoxytyramine	Alkaloids	Phenolamine	78510-19-7	1	1735400	1700700	2239000	17656000	14834000	3911600	2522900	2731900	3429600	1122100	1706200	6743000	6651400	2429400	3907500	3572400	1479400	1285800	11314000	11303000	12607000	13188000	13039000	12372000	12118000	13185000	--	--
Lmmn000774	343.1	181.05	344.111	C15H20O9	[M-H]-	Dihydrocaffeoylglucose	Phenolic acids	Phenolic acids	-	3	159420	119190	145860	110880	103950	101140	116930	145880	152320	112530	132240	116690	99230	121000	94398	95462	114420	117660	131850	175360	130190	176810	172190	170540	171640	189010	--	--
Zmln000899	343.11	181.05	344.111	C15H20O9	[M-H]-	Syringaldehyde-4-O-glucoside	Phenolic acids	Phenolic acids	-	2	13082	27042	40578	14427	18715	19127	29452	37609	36901	29287	47033	39500	30904	21022	52609	21835	29508	42233	51803	55652	51379	56937	42379	49995	53926	55006	--	--
MWS1983	343.12	89.03	344.132	C12H24O11	[M-H]-	Maltitol	Others	Saccharides and Alcohols	585-88-6	3	29980	53499	45898	20922	16305	33472	58854	40742	42558	41267	50554	9343.2	4235	32194	11960	19316	33226	30774	31700	19550	15327	22924	17524	22088	17574	17552	--	--
MWSslk074	343.12	59.01	344.132	C12H24O11	[M-H]-	Lactitol	Others	Saccharides and Alcohols	585-86-4	2	533930	436250	684030	555170	556450	571460	496850	509220	713280	502630	630970	504770	126940	466320	674180	775880	999460	768930	961590	1234100	910860	1046000	1016100	1039600	1012400	1160500	--	--
mws0609	344.04	150	345.047	C10H12N5O7P	[M-H]-	Guanosine 3',5'-cyclic monophosphate	Nucleotides and derivatives	Nucleotides and derivatives	7665-99-8	1	740270	2295300	1996000	1059600	989290	1204200	2080400	1943600	1586800	1388200	1217800	3762200	378890	829200	998180	505500	291150	615000	1650500	1744400	1811200	1999700	1974000	1770000	1963300	1678000	C00942	ko00230,ko01100
pmb0801	346.11	184.1	345.106	C14H19NO9	[M+H]+	4-Pyridoxic acid-O-glucoside	Others	Vitamin	-	1	62167	51573	56491	80166	69549	56874	86776	59019	82696	59042	67082	59528	22570	55211	81417	72036	93692	58576	63712	63576	60796	72843	56421	71845	63233	82193	--	--
Lmyp003381	347.13	301.13	346.126	C15H22O9	[M+H]+	3,4,5-Trimethoxyphenyl-1-O-glucoside	Phenolic acids	Phenolic acids	-	2	933830	912180	1123500	855960	904730	806760	990430	970570	977490	981550	928370	846710	807340	671810	499220	842070	832640	795730	551200	589840	623710	608230	604210	630280	591360	687600	--	--
mws0874	346.06	210.9	347.063	C10H14N5O7P	[M-H]-	3'-Adenylic Acid	Nucleotides and derivatives	Nucleotides and derivatives	84-21-9	1	374710	395820	354570	171500	167200	186150	309490	384580	331520	244050	376660	505150	92077	104030	164190	245660	235890	286630	265050	242480	238710	210420	191440	242510	217530	192890	C01367	ko00230,ko01100
pmb0981	348.07	136	347.063	C10H14N5O7P	[M+H]+	Adenosine 5'-monophosphate	Nucleotides and derivatives	Nucleotides and derivatives	61-19-8	1	15184000	12835000	13697000	1448300	1162400	1697500	14018000	15602000	11041000	7594000	5416400	5380400	902340	1103600	991600	11401000	16106000	11298000	4535800	4906500	5491500	6903000	5243700	4826900	5134300	5566700	C00020	ko00230,ko00908,ko01100,ko01110
pmb0532	349.05	137.3	348.047	C10H13N4O8P	[M+H]+	Inosine 5'-monophosphate	Nucleotides and derivatives	Nucleotides and derivatives	131-99-7	3	1189900	950420	1125100	110660	93922	128960	1207800	1516500	983630	611290	426210	409480	63200	81016	86895	1016800	1344500	868500	366020	392830	352050	505090	386560	459080	384740	450450	C00130	ko00230,ko01100,ko01110
pmb1562	351.25	146.9	350.246	C21H34O4	[M+H]+	1-Stearidonoyl-Glycerol	Lipids	Glycerol ester	-	1	9890.4	18997	24425	36941	34254	37094	26055	17833	38362	8395.2	14192	4611.2	6994.6	6895.6	2804.7	4952.5	11651	5725.2	15160	23414	21786	16554	14253	11117	18649	18821	--	--
MWStz224	353.15	177.06	352.142	C20H20N2O4	[M+H]+	N-Feruloylserotonin	Alkaloids	Plumerane	68573-23-9	2	87203	46693	245200	1399900	1981400	1960100	172970	253370	179090	383860	618360	953210	2284000	3563700	2770400	325060	492890	416830	256120	604780	519490	371990	554510	624490	616110	608810	--	--
MWStz202	353.15	177.06	352.142	C20H20N2O4	[M+H]+	cis-Moschamine	Alkaloids	Plumerane	193224-24-7	2	109420	92599	182080	1713500	958510	2146300	269260	165030	198860	547110	523620	897410	3356700	3992000	2262700	393200	445500	213000	340730	527750	462020	404360	518860	803330	601570	450510	--	--
Lmhp011562	353.27	261.22	352.261	C21H36O4	[M+H]+	1-α-Linolenoyl-glycerol	Lipids	Glycerol ester	-	1	7210400	7040200	6946200	4396300	4511300	6408500	7643500	6560900	8045400	7478200	9549000	6411600	4751700	4729400	6932500	6741100	9330700	6310600	6672600	6563600	7453200	6829700	7744800	7638800	7420300	7450000	--	--
Lmhp011388	353.27	261.22	352.261	C21H36O4	[M+H]+	2-α-Linolenoyl-glycerol	Lipids	Glycerol ester	55268-58-1	1	7325800	6693000	6416300	4454400	4793300	6306700	7133200	6616400	7882000	6800900	9322800	6652200	4665600	5046700	7548800	7046900	8711100	6228100	6960400	6614100	7071300	6503000	8171900	7256400	7457900	7881300	--	--
pme1816	353.09	191	354.095	C16H18O9	[M-H]-	Neochlorogenic acid (5-O-Caffeoylquinic acid)*	Phenolic acids	Phenolic acids	906-33-2	1	30406	12744	327020	1298600	1039200	1486300	744780	659690	564080	1493300	1552100	1762200	20839	84661	151110	1775600	1654500	2216200	440230	422620	389080	399550	439690	445310	432020	332290	C17147	--
mws0178	353.09	191.01	354.095	C16H18O9	[M-H]-	Chlorogenic acid (3-O-Caffeoylquinic acid)*	Phenolic acids	Phenolic acids	327-97-9	1	16499	19552	342120	1297400	1352200	1786200	717180	741010	639300	1974100	1568200	1959800	19566	104020	191260	2052300	2107300	2129200	425110	383590	416900	421870	451700	477170	379130	485770	C00852	ko00940,ko00941,ko00945,ko01110
mws2108	353.09	191.05	354.095	C16H18O9	[M-H]-	Cryptochlorogenic acid (4-O-Caffeoylquinic acid)	Phenolic acids	Phenolic acids	905-99-7	2	17255	21430	269970	1019800	867090	1174900	498880	409950	451310	1253800	1241100	1186900	12982	72668	109040	1344700	1304300	1647500	295010	309910	259140	324010	322640	354120	316530	306760	--	--
mws1077	355.1	193.05	354.095	C16H18O9	[M+H]+	Scopoletin-7-O-glucoside (Scopolin)	Lignans and Coumarins	Coumarins	531-44-2	1	121790	60114	57694	84373	95522	116630	56695	80305	87197	59388	61587	88108	68601	91246	81285	64829	55774	41799	65925	87784	80692	79404	101260	87010	80962	81077	C01527	ko00940,ko01110
Lmhp112042	355.28	263.24	354.277	C21H38O4	[M+H]+	1-Linoleoylglycerol	Lipids	Glycerol ester	2277-28-3	1	997080	886270	937200	534170	497860	638820	914440	895670	1103300	734680	881790	762780	740460	387470	858170	1140900	1233800	1012600	1338200	1385100	1441600	1435600	1678700	1531400	1514400	1588200	--	--
Lmhp012042	355.28	263.24	354.277	C21H38O4	[M+H]+	2-Linoleoylglycerol	Lipids	Glycerol ester	3443-82-1	1	1026000	860150	975330	521200	486410	626740	908720	911590	1200900	787300	811820	797770	694340	391310	844290	1140000	1266300	999900	1274900	1359100	1458600	1318700	1578500	1522100	1529700	1598500	--	--
Lmsn003318	355.1	175.04	356.111	C16H20O9	[M-H]-	1-O-Feruloyl-β-D-glucose	Phenolic acids	Phenolic acids	7196-71-6	1	1673100	2336900	1875500	3680100	3968800	3380200	4561700	2249300	1928600	9685900	6126100	8409300	7541700	6923300	10112000	18173000	12726000	11431000	13249000	12435000	11992000	13328000	12625000	13183000	12479000	14058000	C17759	--
Hmhn003518	355.1	175.04	356.111	C16H20O9	[M-H]-	4-O-β-D-glucosylferulic acid	Phenolic acids	Phenolic acids	-	1	2270100	3437200	2489900	4709700	5197800	4429300	5840700	2994900	2788300	11826000	8370600	10005000	9007500	8813600	11177000	20945000	14690000	13119000	15103000	15105000	15556000	15906000	14908000	16502000	15875000	15837000	--	--
Hmmn002544	355.1	193.05	356.111	C16H20O9	[M-H]-	Ferulic acid-4-O-glucoside	Phenolic acids	Phenolic acids	117405-51-3	1	178790	354030	265640	200680	166990	221940	260490	210030	181430	435940	273690	498660	307560	256670	319470	573320	441740	565450	353460	442920	233740	364930	260280	475170	302890	298930	--	--
Zmhn002334	355.1	193.05	356.111	C16H20O9	[M-H]-	6-O-Feruloyl-D-glucose	Phenolic acids	Phenolic acids	137887-25-3	2	495560	644030	531580	661400	668860	744590	923660	658360	632240	1068700	745250	1090100	809770	979650	853510	1431000	1462000	1199900	1037200	981030	1029900	1088400	938520	947710	1028400	1107800	--	--
pmb0296	357.3	265.4	356.293	C21H40O4	[M+H]+	1-Oleoyl-Sn-Glycerol	Lipids	Glycerol ester	129784-87-8	2	932370	1138500	1064800	2057800	1558500	2828600	1356800	1189900	2335000	1277000	1967900	1183000	1907500	1185400	2990200	882300	1391400	1126700	1636100	1754900	1910800	1865600	2088300	1943300	2009800	2117100	--	--
Lmsp004450	359.15	131.05	358.142	C20H22O6	[M+H]+	Dehydrodiconiferyl alcohol	Phenolic acids	Phenolic acids	97465-82-2	3	33889	41500	45350	26768	21222	25642	47901	36272	43114	43940	30070	35880	34327	39428	33772	45470	43756	34146	22608	27630	33500	28410	35395	40532	29615	34651	--	--
pme0085	359.08	196.7	360.084	C18H16O8	[M-H]-	Rosmarinic acid	Phenolic acids	Phenolic acids	537-15-5	2	32398	27074	39283	16744	27040	19493	29207	25210	21940	31952	25139	38102	28242	20301	25518	36794	51306	32914	36649	19468	38475	24418	26823	37097	33489	32446	C01850	ko00350,ko01100
pmb0998	364.07	152.1	363.058	C10H14N5O8P	[M+H]+	Guanosine 5'-monophosphate	Nucleotides and derivatives	Nucleotides and derivatives	85-32-5	2	657620	414620	394320	85136	18720	121920	585800	619230	449770	295970	228420	189370	16923	25530	6760.4	724640	1022800	639050	180340	256870	271920	351020	208240	213480	198320	205130	C00144	ko00230,ko01100
mws5040	365.11	203.05	364.078	C12H21O11Na	[M+H]+	Turanose	Others	Saccharides and Alcohols	547-25-1	1	45033	92113	68099	32895	59937	129590	213190	114410	226960	102960	75186	110580	108580	41176	191290	73495	117140	201790	215080	126210	122210	109710	123930	186140	282280	201990	C19636	--
pmb0752	369.12	177.1	368.111	C17H20O9	[M+H]+	3-O-Feruloylquinic acid	Phenolic acids	Phenolic acids	1899-29-2	3	8473.2	15429	3403	11891	15014	20837	14570	3475.4	59580	38198	36447	42130	49175	43972	46873	48183	55508	52456	60208	42897	53217	61771	51195	54548	62495	47285	C02572	--
pmn001695	371.1	249.06	372.106	C16H20O10	[M-H]-	Trihydroxycinnamoylquinic acid	Phenolic acids	Phenolic acids	-	2	72240	109980	105860	359970	401890	342710	68212	72614	86419	102010	88475	145650	332700	371270	315220	54796	50541	43880	130530	131120	156560	136410	121080	146910	140380	139590	--	--
Hmgn002833	371.11	297.11	372.12	C20H20O7	[M-H]-	4-Ketopinoresinol	Others	Others	-	1	39984	39737	35054	29920	22403	33917	39684	34164	43728	42306	39454	58614	63191	32993	49733	60692	48409	49080	41869	44252	41980	47274	43838	39455	44492	43100	--	--
Hmgn004693	371.11	327.03	372.121	C20H20O7	[M-H]-	8-Hydroxy-α-conidendrin	Lignans and Coumarins	Lignans	-	2	8805	4914.9	6696.2	5291.5	5124.9	7959.1	5861.9	6888	5660.4	8379.9	8178	10563	12016	4958.5	10113	12512	11226	7655.9	11222	12147	7069.2	10652	10870	10082	6296.8	13642	--	--
MWSHY0027	373.13	343.09	372.121	C20H20O7	[M+H]+	4',5,6,7,8-Pentamethoxyflavone	Flavonoids	Flavonoid	481-53-8	2	160370	183360	181090	191040	186570	190910	211230	235620	212400	235820	227510	247130	191160	200670	206160	233160	228070	251610	262130	263200	299710	311460	299470	296840	281650	294760	C10190	--
mws1313	373.13	312.1	372.121	C20H20O7	[M+H]+	5,6,7,3',4'-pentamethoxyflavone	Flavonoids	Flavonoid	2306-27-6	2	3191	2756	2490.1	3268.6	2228	4237.3	4739.1	3022	4516.1	5308	5853.7	3428.4	3919.5	3693.9	2605.3	2422.1	5484	4612.7	6512.2	6246.6	7264.2	8181.8	10206	7903.2	6683.2	8411.7	C10186	--
pmp000695	375.13	177.05	374.121	C16H22O10	[M+H]+	Swertiamarin	Terpenoids	Monoterpenoids	17388-39-5	2	1097800	1174300	1191700	1020800	844030	998640	1347800	1300000	1110300	1603700	1549800	1544800	1413100	1290800	1379100	1806400	1711800	1659600	1064300	1161100	1232900	1274800	1125600	1155100	1243300	1215700	C09800	--
Lmzn001983	375.13	135.05	376.137	C16H24O10	[M-H]-	D-Threo-guaiacylglycerol-7-O-β-D-glucoside	Phenolic acids	Phenolic acids	-	1	88788	85913	91645	76329	62720	76487	97095	67304	76653	135850	119950	88830	108800	123540	75913	94662	122040	109910	68433	73532	73196	68547	75648	72816	67896	68238	--	--
mws0232	377.15	243	376.138	C17H20N4O6	[M+H]+	Riboflavin (Vitamin B2)	Others	Vitamin	83-88-5	1	988860	645040	782760	3575300	2814500	3402700	818590	837240	1314800	792840	1157700	799940	1721100	1580900	1430200	852850	951040	768370	1457100	1489500	1516400	1700600	1680900	1526100	1758500	1543800	C00255	ko00740,ko01100,ko01110,ko02010
MWS0952	380.26	78.96	381.264	C18H40NO5P	[M-H]-	Dihydrosphingosine-1-Phosphate	Lipids	Sphingolipids	19794-97-9	3	1183.5	801.52	822.72	1443.1	563.58	945.36	987.91	1139	1319.5	2196.3	2175.2	2259.7	1418.1	1228.6	1517.3	1946.5	1613.3	1981.9	892.66	1793.2	2550.2	2357.2	2356.8	1555	2607.4	2180.4	C01120	ko00600,ko01100
pme3337	384.12	252	383.108	C14H17N5O8	[M+H]+	Succinyladenosine	Nucleotides and derivatives	Nucleotides and derivatives	4542-23-8	1	1721600	1800300	1638500	2568100	3428400	2370400	1838300	1942800	2245100	3008900	3422100	3373000	2372500	2232800	2026300	2833800	3083800	2736100	1749600	1899400	1940500	1924600	2044300	2098600	1949900	2129200	--	--
Lmbp003208	385.12	223.06	384.106	C17H20O10	[M+H]+	Fraxidin-8-O-glucoside	Lignans and Coumarins	Coumarins	-	2	14982	17792	12895	15626	23155	31802	7280.2	13012	20961	63898	52616	80706	81839	68634	69353	65858	60115	65474	47416	39334	45899	29327	43510	34192	62070	55313	--	--
pme1286	385.13	250	384.122	C14H20N6O5S	[M+H]+	S-(5'-Adenosy)-L-homocysteine	Amino acids and derivatives	Amino acids and derivatives	979-92-0	1	100700	122020	131770	62126	57386	81835	134900	130870	134600	158580	157870	211130	96091	106390	89524	187470	223230	174790	95660	112750	114920	115750	90984	122600	106680	107840	C00021	ko00270,ko01100,ko01230
Zmhn002227	385.11	223.06	386.121	C17H22O10	[M-H]-	4-O-Glucosyl-sinapate	Phenolic acids	Phenolic acids	-	2	8552.1	22825	22187	7352.3	15478	16924	12784	8925.7	10485	15452	18472	9852.8	15665	12617	15708	8305	10583	7958.1	23073	16675	28777	19538	17343	26055	20075	23291	C02919	--
HJN003	385.11	223.06	386.122	C17H22O10	[M-H]-	1-O-Sinapoyl-D-glucose	Phenolic acids	Phenolic acids	-	1	173540	188890	200750	221570	213100	199030	187760	145760	134320	139050	121120	197340	204280	161890	271320	162700	121830	154510	172690	199500	235440	180500	216990	251350	254960	227040	C01175	ko00940
pmn001423	385.19	223.13	386.194	C19H30O8	[M-H]-	Roseoside	Others	Others	54835-70-0	2	267060	315300	346670	450580	350150	396010	325410	262470	235500	300200	272650	376350	417790	319590	483530	310080	306030	273000	425240	443890	461550	461340	473880	494200	400760	469180	--	--
pmp001161	389.12	328.1	388.116	C20H20O8	[M+H]+	5-Hydroxyauranetin	Flavonoids	Flavonols	50439-46-8	2	621.23	519.82	827.54	469.61	731.7	1257.2	938.82	312.02	1250.7	1878.7	942.81	839.18	886.47	1153.4	1040.8	940.37	159.36	1571	2104.6	1356.5	517.01	1406	1359.7	1777.5	1259.9	2282.3	--	--
Jmbp006554	389.12	359.07	388.116	C20H20O8	[M+H]+	ethyl rosmarinate	Phenolic acids	Phenolic acids	-	3	3545	5201	4122.9	5012.9	7310.1	4576.5	4136.6	4032.7	5988.2	6546.7	5571.1	5855.3	4153.4	4810.1	6761.9	5236.9	7093.5	6755.4	6865.8	9258.8	10914	9601.7	8369.4	11284	8520.2	9553.8	--	--
mws1565	389.14	209.08	388.137	C17H24O10	[M+H]+	Geniposide	Terpenoids	Monoterpenoids	24512-63-8	2	2017300	1785900	2479100	2746200	3589900	3722100	3385400	3934000	1900600	434060	678880	579720	608590	497010	1274800	336120	331780	263720	780200	997950	1323700	692730	1243000	826490	1024600	1198300	C09781	--
Hmmp003004	389.14	149.06	388.137	C17H24O10	[M+H]+	Vogeloside	Others	Others	60077-47-6	3	1402700	2637500	1696700	2100300	1808300	2543000	1093700	1145100	1669700	267210	137670	256700	470900	616360	1381600	140970	129860	138460	1052700	596150	376170	734730	1112700	939200	840830	606300	--	--
Lmwp011196	391.28	149.02	390.277	C24H38O4	[M+H]+	Bis(2-ethylhexyl)phthalate	Phenolic acids	Phenolic acids	117-81-7	2	14407000	14876000	12860000	22450000	13784000	24403000	21814000	9088900	7968900	21763000	13205000	15600000	17817000	17383000	30758000	13002000	10114000	14397000	833650	958360	973650	982850	951740	886330	994500	894140	C03690	--
Lmmp010562	391.28	149.02	390.277	C24H38O4	[M+H]+	Diisooctyl Phthalate	Phenolic acids	Phenolic acids	27554-26-3	1	13929000	14837000	13017000	23004000	14332000	25032000	22590000	9309400	8037000	22321000	13119000	15731000	18481000	17725000	31348000	13198000	10246000	14521000	876070	1010300	1032500	884650	964550	893790	1016200	905850	C14577	--
mws1051	400.14	251	399.145	C15H23N6O5S	[M+H]+	S-Adenosyl-L-methionine	Amino acids and derivatives	Amino acids and derivatives	485-80-3	3	41205	45564	39357	54664	32367	58986	44157	51552	53749	39957	57888	52549	25932	35821	22613	31658	39490	39646	30903	21393	31252	37254	52495	45448	29574	32247	C00019	ko00261,ko00270,ko00330,ko00908,ko01100,ko01110,ko01230,ko04122
Hmbn005456	399.11	163.04	400.116	C21H20O8	[M-H]-	1-O-Caffeoyl-3-O-p-coumaroylglycerol	Lipids	Glycerol ester	-	3	12532	14363	16209	23494	24072	24832	14085	21501	26071	13055	16573	15087	27536	34094	25183	9170	10617	11480	11030	10489	13265	9317.2	11978	13625	12305	10970	--	--
MWSHY0018	403.14	373.1	402.131	C21H22O8	[M+H]+	5,6,7,8,3',4'-Hexamethoxyflavone	Flavonoids	Flavonoid	478-01-3	2	127550	129660	128490	136530	127060	136860	162610	154440	150710	175970	172200	155650	129210	129730	127590	165730	166900	164530	178050	186730	201550	203280	204100	190210	192180	193650	C10112	--
Cmjn004337	401.14	269.1	402.153	C18H26O10	[M-H]-	Benzyl-(2''-O-xylosyl)glucoside	Phenolic acids	Phenolic acids	-	3	73816	67892	65062	12562	26096	32849	87623	70180	55471	38763	32879	49575	34147	37551	35563	37108	59800	39510	35738	46064	49105	48326	40307	48242	33728	43216	--	--
pmf0248	403.36	373.1	402.35	C27H46O2	[M+H]+	Delta-Tocopherol	Others	Vitamin	119-13-1	3	1804.8	2803.8	2538	2912.3	2713	3012.1	2782.2	1759.3	3578.2	2764.5	3558	5352.5	2389.8	3882.9	2526	5321.4	3381.9	3039.3	4365.6	4311.3	5220.2	4649.2	5164.7	4546.6	3669.9	4366.8	C14151	ko00130,ko01100,ko01110
pme3007	402.99	159	404.002	C9H14N2O12P2	[M-H]-	Uridine 5'-diphosphate	Nucleotides and derivatives	Nucleotides and derivatives	27821-45-0	1	88733	86323	117590	24274	21145	31543	108200	129810	128430	82429	91184	89962	18092	25713	31900	80304	118710	90956	57926	53978	61073	56189	60986	62791	59743	62757	C00015	ko00240,ko00908,ko01100
pmd0152	409.24	153	410.243	C19H39O7P	[M-H]-	LysoPA 16:0 (2n isomer)	Lipids	Glycerol ester	-	3	39321	32835	35649	10873	11782	20883	58013	34970	43062	19129	24366	25292	5427.2	3360.2	6264.6	30595	42292	6022.8	41296	15265	31646	36735	33401	5834.1	30795	38596	--	--
Lmbp003668	419.1	287.05	418.09	C20H18O10	[M+H]+	Kaempferol-3-O-arabinoside	Flavonoids	Flavonols	-	2	85162	160350	160760	321340	275720	267860	148100	158460	162560	238870	176430	347220	459840	473140	372880	251840	194100	184350	295870	327640	315040	306710	292930	330190	294020	303560	--	--
mws1089	421.1	241	422.083	C12H23O14P	[M-H]-	Sucrose-6-phosphate	Others	Saccharides and Alcohols	-	3	21269	10805	14059	2982	4490.9	3950.5	15761	31346	23333	5198	32581	16238	9971.7	7006.3	24544	21401	35258	12978	18022	14972	8550.7	17640	29098	30810	18601	25022	--	--
mws2523	421.08	241.1	422.083	C12H23O14P	[M-H]-	Trehalose 6-phosphate	Others	Saccharides and Alcohols	4484-88-2	1	6362.2	4041.9	4920.7	2873.1	317.92	3994.6	5081.2	3878.4	8200.4	2771.6	8113.7	3096.4	5422.5	4293.3	4667.9	9271.5	14050	10404	8621.3	6032.3	7688.2	7492.6	8593.8	9893	6106	11509	C00689	ko00500,ko01100,ko01110
Cmyp005063	425.18	147.04	424.173	C21H28O9	[M+H]+	Grandidentatin	Phenolic acids	Phenolic acids	15732-48-6	1	217930	213990	213350	157160	178810	222080	246990	203280	228350	261820	270430	242740	440920	530940	239720	339340	364530	313030	235660	233450	183280	214090	223790	239940	226040	217920	C10463	--
pmb0864	426.26	285.24	425.254	C19H40NO7P	[M+H]+	LysoPE 14:0	Lipids	LPE	-	1	322860	302370	348080	72818	45368	92175	428460	549910	677050	141460	149010	144230	43564	44863	104490	253300	238910	250150	328740	330330	305930	339850	353920	350100	328200	344840	--	--
Lmhp008337	426.26	285.24	425.254	C19H40NO7P	[M+H]+	LysoPE 14:0(2n isomer)	Lipids	LPE	-	1	117320	98363	113690	12670	7938.1	17245	154580	229540	230780	46855	48316	47001	9027.8	7300.7	21476	74003	81514	79749	91915	91749	96018	102380	110550	94407	97593	100830	--	--
pmp000436	427.39	409.38	426.386	C30H50O	[M+H]+	Taraxerol	Terpenoids	Triterpene	127-22-0	2	17167	17473	22656	36872	25067	43941	15793	15818	18892	24496	23271	24199	71811	39906	79103	13150	16755	29578	32704	31193	34863	37217	34883	33707	34370	32048	C08637	ko00909,ko01110
pme2117	426	159	427.029	C10H15N5O10P2	[M-H]-	Adenosine 5'-diphosphate	Nucleotides and derivatives	Nucleotides and derivatives	58-64-0	3	397750	311740	332990	47935	24372	40516	278010	309190	249860	348950	282400	199230	31893	27632	45544	441600	634660	339250	71530	137940	167640	162600	168270	111140	151630	154780	C00008	ko00190,ko00195,ko00230,ko00908,ko01100,ko01110
mws0919	431.1	285	432.106	C21H20O10	[M-H]-	Kaempferol-3-O-rhamnoside (Afzelin)	Flavonoids	Flavonols	482-39-3	1	1584.6	9	1310.9	7678.2	6369.8	2637.8	4229.9	660.49	1720.8	12154	9554.2	18555	11239	14302	11003	10605	4378.1	7935.9	6784.6	3964.7	14996	11912	12445	10456	8431.5	5170.4	C16911	ko00944
pmp000117	433.15	403.11	432.142	C22H24O9	[M+H]+	3,5,6,7,8,3',4'-Heptamethoxyflavone	Flavonoids	Flavonols	1178-24-1	2	743.5	2139.4	1841.1	2200.5	2612.3	3889.2	5637.7	5558.7	5158.2	6244	5702.8	5156.8	1946	1545.4	1875.4	4474.2	6373	5743.3	7844.5	6897.3	7318.8	7840.2	7245.3	7808.9	8039.5	6371	--	--
Lmtn002324	431.15	269.1	432.163	C19H28O11	[M-H]-	Benzyl-(2''-O-glucosyl)glucoside	Phenolic acids	Phenolic acids	-	2	25127	21574	25268	141250	128300	153110	26856	18611	30942	53290	34550	41408	140300	169620	157720	19302	23731	22549	24749	34194	56856	52340	51549	32090	53223	29379	C17564	--
mws2186	435.09	303	434.085	C20H18O11	[M+H]+	Avicularin(Quercetin-3-O-α-L-arabinofuranoside)	Flavonoids	Flavonols	572-30-5	1	21729	6424.2	5571.8	9317.2	51769	59803	28539	2228	5872	305750	260090	591400	1070200	1046800	741410	360870	402720	324260	231060	230380	247040	247950	302860	274350	268560	245660	--	--
Lmdp003509	435.09	303.06	434.085	C20H18O11	[M+H]+	Quercetin-3-O-xyloside (Reynoutrin)	Flavonoids	Flavonols	549-32-6	3	41247	6726	23537	38600	50321	90785	16209	12458	4469	418860	347150	665980	1382400	1296500	981730	373760	444410	416680	284070	290960	292770	293780	338850	321580	322590	299880	--	--
MWStz103	399.15	250.09	434.114	C15H23ClN6O5S	[M-Cl]+	S-(5'-Adenosyl)-L-methionine chloride	Amino acids and derivatives	Amino acids and derivatives	24346-00-7	1	138260	113460	91516	140870	113440	108440	140640	215590	176890	105620	105900	207100	109850	91023	106190	166000	125330	204370	75385	112840	115580	109300	130470	134260	64079	91911	--	--
HJN087	433.12	271.06	434.121	C21H22O10	[M-H]-	Naringenin-4'-O-glucoside	Flavonoids	Dihydroflavone	-	3	38148	52117	53135	54938	55016	68339	57869	54081	66148	51274	33870	49379	64982	59107	66699	52805	44982	37093	33813	43475	51479	39599	40656	25854	41808	44502	--	--
Cmzn005251	433.11	271.06	434.121	C21H22O10	[M-H]-	6-O-Caffeoylarbutin	Phenolic acids	Phenolic acids	136172-60-6	3	21345	26404	35155	13482	24617	34210	45738	22730	26895	43656	47308	61556	59463	65380	67599	53863	49302	50462	34649	19894	33338	13566	24602	54052	27856	28314	--	--
mws2118	435.13	166.7	436.137	C21H24O10	[M-H]-	Phloretin-2'-O-glucoside (Phlorizin)	Flavonoids	Chalcones	60-81-1	1	40812	68792	69277	45096	44037	68578	105140	60562	56417	90723	60378	86468	63157	62566	58091	84053	112880	99593	41516	46621	38274	39949	48534	55892	52289	40900	C01604	ko00941,ko01110
Lmhp008440	438.26	297.24	437.254	C20H40NO7P	[M+H]+	LysoPE 15:1	Lipids	LPE	-	2	35870	32211	30711	6463.5	6609.7	8282.8	36196	44152	50884	15749	19037	19295	7185	6799.2	19901	22116	32442	30744	67516	83310	86723	76392	86067	90797	74292	89596	--	--
Lmhp008273	438.26	297.24	437.254	C20H40NO7P	[M+H]+	LysoPE 15:1(2n isomer)	Lipids	LPE	-	2	10295	9479.4	12654	2517	1800.1	1767.3	10041	13662	19737	4680.2	6726.3	6411	1359.5	2293.8	5377.6	8731.4	8160.6	9522.2	23583	24451	29728	27455	20044	28670	25088	23731	--	--
pmb0862	440.28	184.07	439.27	C20H42NO7P	[M+H]+	LysoPC 12:0	Lipids	LPC	20559-18-6	3	6914.4	11531	14713	6192.3	4605.2	4872	29094	61095	46179	37082	32919	34732	3386.3	2466.4	5765.7	28772	31039	41003	13012	11216	13324	12237	12535	11978	11712	12696	--	--
Lmhp009187	440.28	299.26	439.27	C20H42NO7P	[M+H]+	LysoPE 15:0	Lipids	LPE	-	1	283940	233220	275050	35362	37448	62864	300700	413640	538570	92228	101360	74315	25483	23686	70769	168220	179710	163030	399200	448890	425740	423960	485290	461340	467590	474810	--	--
Lmhp008885	440.28	299.26	439.27	C20H42NO7P	[M+H]+	LysoPE 15:0(2n isomer)	Lipids	LPE	-	1	112470	89457	105640	9435.3	7288.1	14651	130310	167700	214720	31463	30232	27728	3810.8	8249.1	19093	57486	78410	56718	137060	160490	144280	144920	170920	153930	161690	149410	--	--
pmp000438	443.39	425.38	442.381	C30H50O2	[M+H]+	Betulin	Terpenoids	Triterpene	473-98-3	3	19067	15473	80552	271470	103060	10577	6498	1115900	23185	6256.6	16928	61111	186400	18933	13505	9801.1	4252.4	83574	58897	65541	65770	64886	69998	64365	60824	65518	C08618	--
pme1014	445.3	341.3	444.303	C31H40O2	[M+H]+	Menatetrenone (Vitamin K2)	Others	Vitamin	11032-49-8	3	92946	83353	84490	99613	89870	89436	85120	77568	89161	85468	94280	91706	111940	79249	131950	87009	98115	97539	102530	100730	105310	118050	115850	116460	120490	124420	--	--
pmn001338	445.08	283	446.085	C21H18O11	[M-H]-	Rhein-8-O-glucoside	Quinones	Anthraquinone	34298-86-7	2	15818	11486	15238	10749	14801	11894	13537	23178	18324	9583.8	15709	10637	3082.5	10648	2239.5	12900	11857	11894	9782.5	17266	15844	9844.8	11228	14302	10792	7597.5	--	--
Lmjp004533	447.13	285.08	446.121	C22H22O10	[M+H]+	Kisasagenol A Triacetate	Terpenoids	Terpene	-	1	100220	187650	150750	73267	59649	120560	111810	105540	146590	28509	24532	42449	10977	5667.2	19277	14040	11936	8517.1	111240	143890	116930	115230	123390	127580	154590	115080	--	--
Lmhp007836	448.25	307.23	447.239	C21H38NO7P	[M+H]+	LysoPE 16:3	Lipids	LPE	-	2	531690	537930	594320	38304	38336	67068	700260	845360	772990	236990	283880	217470	29884	37334	80023	424250	446490	397660	227920	230300	211450	236810	245560	240010	221860	220780	--	--
Hmcp002316	449.11	317.06	448.1	C21H20O11	[M+H]+	Isorhamnetin-3-O-arabinoside	Flavonoids	Flavonols	-	1	19660	8809.4	4868.5	38829	29020	63162	22392	7920	5768.8	324370	275540	633950	796650	1085000	537550	394620	344850	316590	268580	275940	284920	302320	306720	296400	267710	287400	--	--
pme2459	449.11	287.2	448.101	C21H20O11	[M+H]+	Luteolin-7-O-glucoside (Cynaroside)	Flavonoids	Flavonoid	5373-11-5	1	9777600	11409000	11356000	24325000	16761000	20209000	9123600	9056400	12974000	2128500	2171500	2895100	3807400	4070600	2876400	1917700	2133300	2207800	4234000	5177300	5472900	4947000	5224700	5623600	5176900	5744300	C03951	ko00944
Hmpp003270	449.11	287.05	448.101	C21H20O11	[M+H]+	Luteolin-4'-O-glucoside	Flavonoids	Flavonoid	6920-38-3	1	560650	832020	776820	1674100	1518800	1614200	1502000	716760	964360	2833900	1835600	2690600	3073600	3278200	3090000	2982400	2648100	1970300	1863200	2734700	2438000	1840200	1817500	1881700	1842200	2363900	--	--
mws0913	447.09	285	448.101	C21H20O11	[M-H]-	Kaempferol-3-O-galactoside (Trifolin)	Flavonoids	Flavonols	23627-87-4	1	95838	202550	172780	128830	137530	135760	192840	239230	265940	29088	42586	111620	37001	44407	58606	53047	67225	58708	91274	93954	90613	98196	83929	80333	72144	79965	C12626	ko00944
Xmyp005654	449.11	287.06	448.101	C21H20O11	[M+H]+	Kaempferol-4'-O-glucoside	Flavonoids	Flavonols	-	1	625810	858420	824470	2263400	838260	1392700	839520	813340	753800	1979100	1167000	2305300	3132400	4286000	2283900	2734000	1844100	1947700	2382400	2353300	2243500	2501400	2121600	2273800	2118900	2256500	--	--
mws0089	447.09	285.04	448.101	C21H20O11	[M-H]-	Kaempferol-7-O-glucoside*	Flavonoids	Flavonols	16290-07-6	1	67726	72756	72493	59367	45990	55264	78330	105970	97886	91644	99017	101850	117850	51658	92943	101480	105550	81279	79299	74661	77199	77007	78481	84102	56949	67060	--	--
MWS20147	449.11	287.06	448.101	C21H20O11	[M+H]+	Luteolin-3'-O-glucoside	Flavonoids	Flavonoid	5154-41-6	1	197000	208100	273440	108430	152720	193770	109320	508380	166670	608030	267950	876580	737660	790160	871710	487030	460230	63164	699490	443270	419640	698240	668480	549470	533410	405220	--	--
mws1299	449.11	299.2	448.101	C21H20O11	[M+H]+	Luteolin-8-C-glucoside (Orientin)	Flavonoids	Flavonoid carbonoside	28608-75-5	3	10286	50351	20082	43377	67609	50968	23673	17393	18586	14792	6568.8	5498	4990.8	2100	5257.5	4204	7358.5	15174	18474	11033	12093	15786	6649.8	11614	6387	18196	C10114	--
mws2209	449.11	287.06	448.101	C21H20O11	[M+H]+	Kaempferol-3-O-glucoside (Astragalin)*	Flavonoids	Flavonols	480-10-4	1	544160	974100	728090	1705200	1440600	1274700	952730	936730	971250	2702300	2258600	2878300	4085200	3456700	3191000	2295800	2200500	2411700	2012400	2350500	2026900	2107700	1758000	1804300	1892800	2058700	C12249	ko00944,ko01110
Zmhn001905	447.09	285.04	448.101	C21H20O11	[M-H]-	HydroxyAloe-emodin-8-O-glucoside	Quinones	Anthraquinone	-	2	101150	179600	191680	101490	157540	173190	232430	216040	203190	33826	58967	80322	46546	51512	49887	57202	64839	45654	71004	78972	62302	74563	118460	104800	98452	101120	--	--
Lmyn006922	447.13	285.08	448.137	C22H24O10	[M-H]-	Sakuranin	Flavonoids	Dihydroflavone	529-39-5	2	27541	24090	24070	29108	27115	21032	34325	41282	29367	29972	30708	28033	34617	30693	29203	27211	28935	22587	28609	24041	23029	22899	21220	21351	18186	25731	C17391	--
Lmsp004301	451.12	289.07	450.116	C21H22O11	[M+H]+	3',5,5',7-Tetrahydroxyflavanone-7-O-glucoside	Flavonoids	Dihydroflavone	-	2	95361	196850	290650	606130	662090	491250	182780	225600	199140	85031	40223	112670	47194	96247	140970	73700	62634	54184	222700	222080	137860	122580	114290	116790	149520	93010	--	--
mws0057	451.12	289	450.116	C21H22O11	[M+H]+	Eriodictyol-7-O-glucoside	Flavonoids	Dihydroflavone	38965-51-4	2	127080	184880	163380	431370	362320	241680	128820	105700	239450	25530	23615	46440	23224	58462	44351	27384	40451	19462	119340	116180	87974	109630	124880	69121	72351	92477	--	--
Lmtn002796	449.1	287.05	450.116	C21H22O11	[M-H]-	Aromadendrin-7-O-glucoside	Flavonoids	Dihydroflavonol	28189-90-4	3	30305	35267	29870	12568	11813	5600.5	39114	34396	37075	30612	22242	17152	1817.2	10904	19556	48994	46637	39590	28778	32206	42583	33955	43139	35591	36342	32180	--	--
HJN086	449.11	287.06	450.116	C21H22O11	[M-H]-	Eriodictyol-3'-O-glucoside	Flavonoids	Dihydroflavone	-	3	7274.6	9276.6	6005.9	4351.1	21836	10885	1536.8	14406	8842.5	16824	11694	29010	129300	124710	124890	24863	20336	7698.8	13183	17900	24441	19812	25582	29860	28992	17336	--	--
MWSmce674	451.36	89.06	450.35	C31H46O2	[M+H]+	Phylloquinone (Vitamin K1)	Others	Vitamin	84-80-0	2	18473	15006	17031	17314	14386	16487	15894	19784	15050	14995	14803	13104	16205	16017	16367	15477	15070	13374	12015	14944	15747	13462	17858	17752	17795	19472	--	--
Lmhp008763	452.28	311.26	451.27	C21H42NO7P	[M+H]+	LysoPE 16:1(2n isomer)	Lipids	LPE	-	1	1134800	944090	1024200	125550	126810	195300	1165300	1519100	1690300	417580	430620	498010	118060	123610	268190	631850	776800	686420	1002100	1085400	1112200	1077300	1140500	1127800	1146100	1098700	--	--
Lmhp009034	452.28	311.26	451.27	C21H42NO7P	[M+H]+	LysoPE 16:1	Lipids	LPE	-	1	1106500	993350	1025100	134720	118070	205780	1240400	1660200	1669100	407070	518250	461750	124140	127060	252030	638150	783360	686440	1014400	1094100	1078400	1189200	1156500	1121000	1107000	1102200	--	--
Lmqn005404	451.09	331.07	452.095	C20H20O12	[M-H]-	4-Hydroxybenzoyl-1-O-(6''-O-galloyl)glucoside	Phenolic acids	Phenolic acids	-	2	81398	62115	66382	29687	23301	29522	62846	70838	68046	75573	74865	67508	24650	21665	44676	59383	62911	85997	38331	39479	40721	34350	42381	39380	35921	38483	--	--
pmb0876	454.29	313.27	453.286	C21H44NO7P	[M+H]+	LysoPE 16:0	Lipids	LPE	53862-35-4	1	818310	664630	669680	100680	85578	146270	829380	1033100	1191600	206340	233570	195170	50097	51420	156000	339300	405850	410770	627370	597920	588340	591270	620740	629690	581360	623460	--	--
pmd0160	454.29	313.27	453.286	C21H44NO7P	[M+H]+	LysoPE 16:0(2n isomer)	Lipids	LPE	-	1	756370	622660	652910	84490	76113	150210	796500	1074600	1165000	190230	217940	200250	47001	40818	144420	334630	412600	342320	566890	564950	597450	534660	599180	615720	532490	586480	--	--
Lmhp005872	455.22	177.05	454.21	C25H30N2O6	[M+H]+	Diferuloylcadaverine	Alkaloids	Phenolamine	-	3	9349.1	9467.9	10588	12033	7717.6	15296	11290	14215	7260.6	5051.7	496.57	4177.6	11777	7947.7	1503.1	1778.4	6718	7438.6	42104	37932	44835	39152	58083	43447	45449	37825	--	--
MWS5083	455.1	96.97	456.105	C17H21N4O9P	[M-H]-	Flavin Single Nucleotide(FMN)	Nucleotides and derivatives	Nucleotides and derivatives	6184-17-4	2	1318900	1149000	1306400	1052500	795160	1262100	1450200	1463700	1549400	1217600	1292000	1032900	636430	517460	686730	1629900	1556500	1509700	1061500	1054300	1005400	1335400	1133300	1025200	1001100	1204000	C00061	ko00190,ko00740,ko01100,ko01110
mws4053	455.35	455.35	456.36	C30H48O3	[M-H]-	Ursolic acid	Terpenoids	Triterpene	77-52-1	2	445.59	849.68	255.32	897.21	1105.8	983.62	789.27	431.58	1315.4	2029.7	1025.4	515.02	4573.2	804.72	375.86	1631.7	607.1	468.84	40121	42579	40220	44989	45957	41667	47307	48092	C08988	--
pmn001700	455.35	455.35	456.36	C30H48O3	[M-H]-	24,30-Dihydroxy-12(13)-enolupinol	Terpenoids	Triterpene	-	1	22806	17643	31011	28156	16461	15578	17004	42617	55138	24314	25111	15697	29723	31658	36383	38617	52027	40195	40277	60883	74844	76531	97990	80359	73089	85394	--	--
HJN110	455.36	455.36	456.36	C30H48O3	[M-H]-	Betulinic acid	Terpenoids	Triterpene	472-15-1	3	699.53	499.85	175.98	1353.7	148.81	676.15	1645.4	1001	755.58	1154.8	1112.5	401.2	470.12	1112.5	400.22	378.72	1715.9	174.76	36768	33967	29567	36212	37388	37215	40650	40925	C08619	--
MWSmce052	455.36	455.36	456.36	C30H48O3	[M-H]-	3-Epiursolic acid	Terpenoids	Triterpene	989-30-0	2	2987.3	2370.5	4062.7	1821.2	468.2	1338.8	1764.9	13667	1382.2	279.92	638.95	15940	2400.4	729.58	436.52	527	3289.9	651.42	20951	19949	20577	20159	20135	23288	18134	23473	--	--
mws0034	457.08	169.01	458.085	C22H18O11	[M-H]-	Epigallocatechin-3-gallate	Flavonoids	Flavanols	989-51-5	3	17680	5855.2	2689	5063.8	4607.5	12835	9178.8	5115.2	7377.5	1348.5	8244.2	19539	17584	16466	19303	2248.2	4565	1345	14954	12384	12201	8045	5535	8559	7864	12129	C09731	--
pmb2654	460.1	117.9	461.153	C19H27NO12	[M-H]-	Anthranilate-1-O-Sophoroside	Phenolic acids	Phenolic acids	-	3	59964	68632	46759	113490	100770	57279	91378	41357	84171	64863	62627	149090	52820	41557	111440	85465	168460	155400	46891	71830	33543	28734	39955	60283	33846	49010	--	--
MWSHY0121	463.09	287.06	462.08	C21H18O12	[M+H]+	Luteolin 7-O-glucuronide	Flavonoids	Flavonoid	29741-10-4	1	3046000	2257900	2946600	3064700	2027800	3009800	2317600	3031400	3058900	2143000	3071400	2770800	2025500	2482900	2862800	1781800	2246200	2634600	2243100	2363800	2322800	2688000	2707600	2194200	1749600	1786100	C03515	ko00944
Lmzn001894	461.07	285.04	462.08	C21H18O12	[M-H]-	Kaempferol-3-O-glucuronide	Flavonoids	Flavonols	22688-78-4	1	3289700	4541800	4790200	7387400	7092100	5916300	5288400	5084000	6051500	1316300	1077800	1564000	2940700	2910200	2770300	1299300	1062800	1074800	3673700	3152800	3532300	3630000	3151900	2337000	3136900	3007100	--	--
MWSHY0035	463.09	287.06	462.08	C21H18O12	[M+H]+	Scutellarein-7-O-glucuronide (Scutellarin)	Flavonoids	Flavonoid	27740-01-8	2	2234700	2583300	2663400	3187800	2910000	2076600	2097200	2682100	2866100	3039100	3076800	2202000	1735500	2122500	3167500	1946100	2303800	2773700	1998300	1943800	2569100	2682100	2980200	2460300	1985200	2293100	--	--
Lmmp003767	463.09	287.05	462.08	C21H18O12	[M+H]+	Kaempferol-7-O-glucuronide	Flavonoids	Flavonols	-	1	16787000	21444000	24114000	12680000	17809000	22507000	24860000	23262000	20978000	612530	99962	623830	616610	798280	742380	83549	49551	334930	9519500	11066000	12144000	8541600	11099000	10959000	11837000	8842400	--	--
pmp000579	463.12	301.07	462.116	C22H22O11	[M+H]+	Diosmetin-7-O-galactoside	Flavonoids	Dihydroflavone	-	3	154820	203410	193430	236560	273730	214340	128870	146890	276190	284760	102840	295840	675130	585170	404490	157340	139880	96692	283090	336950	288270	259860	312800	284080	300200	306350	--	--
Hmcp002539	463.12	317.06	462.116	C22H22O11	[M+H]+	Isorhamnetin-3-O-rhamnoside	Flavonoids	Flavonols	-	3	509.31	1587.7	2168.9	2875.7	4467.5	2241.3	1156.5	835.91	360.88	95679	85224	174100	370080	489670	176830	159320	158160	148120	81435	84024	76463	87923	99561	90892	84203	85091	--	--
pmp000120	463.12	427.1	462.116	C22H22O11	[M+H]+	Diosmetin-6-C-glucoside	Flavonoids	Dihydroflavone	-	3	279950	267610	207030	24158	524340	349390	186470	254300	437880	104200	105540	122000	168060	162580	167220	106610	1691.2	119630	200610	245400	204050	219550	248510	229480	221820	205040	--	--
pmp000233	463.12	313.07	462.116	C22H22O11	[M+H]+	Swertiajaponin	Flavonoids	Flavonoid carbonoside	6980-25-2	3	168180	181090	194000	92328	86770	96626	149920	171780	158310	58218	57131	37405	4259.8	4805	24000	47406	51036	55379	108780	98427	130190	126290	102640	125500	136910	142390	C10187	--
MWS0155	462.07	96.97	463.074	C14H18N5O11P	[M-H]-	Adenylocuccinic Acid	Organic acids	Organic acids	19046-78-7	3	29262	23171	33438	10764	9498.2	6432	28719	26603	34303	30402	33622	19994	299.22	1879.1	6491.6	51644	50503	44595	22348	13637	13876	22693	18847	11146	13999	17799	C03794	ko00230,ko00250,ko01100
Lmdp003286	465.1	303.06	464.095	C21H20O12	[M+H]+	Isohyperoside	Flavonoids	Flavonols	35589-21-0	1	637140	369760	466410	305510	483230	591740	544670	365330	372990	2580700	1497900	2607000	3342100	3729200	3230900	2844300	2818900	2286500	1468800	1445000	1623100	1489400	1653800	1565600	1500600	1728600	--	--
mws0091	463.09	300.03	464.095	C21H20O12	[M-H]-	Quercetin-3-O-glucoside (Isoquercitrin)*	Flavonoids	Flavonols	482-35-9	1	36872	10165	6277	24475	62866	65802	37600	10698	16493	341500	185260	296820	198130	157880	237400	374350	295230	231480	182010	177200	216230	235290	245380	191350	237360	204230	C05623	ko00944,ko01100,ko01110
mws0061	463.09	300	464.095	C21H20O12	[M-H]-	Quercetin-3-O-galactoside (Hyperin)	Flavonoids	Flavonols	482-36-0	1	51244	14103	8587.8	34501	92634	87471	67310	29331	23926	380570	180540	484980	279360	203060	315250	433950	268540	436460	243640	327640	294730	273380	281910	245080	335800	291150	C10073	--
Hmcn001884	463.09	301.03	464.095	C21H20O12	[M-H]-	6-Hydroxyluteolin 5-glucoside	Flavonoids	Flavonoid	-	1	33294	6854	5145	25966	58414	81699	62492	18121	12664	228510	216580	358680	160250	157040	203980	360530	312570	348280	234170	209660	321940	272490	241100	254460	197850	279250	--	--
pmp001309	465.1	303.1	464.095	C21H20O12	[M+H]+	6-Hydroxykaempferol-7-O-glucoside	Flavonoids	Flavonols	-	1	2365900	245310	199940	1910600	2800100	3779300	1723200	563940	804350	6492100	6168600	8293000	12509000	15527000	9823200	6559200	10032000	7409100	2190300	2684000	2328900	2415200	3231700	2946600	3279400	3405700	--	--
Smgp004575	465.1	303.05	464.095	C21H20O12	[M+H]+	Quercetin-5-O-glucoside	Flavonoids	Flavonols	-	2	447570	348360	432590	330200	416660	574580	562620	329330	340880	2681400	1556600	2652400	3355000	3788800	3001200	2731900	2884800	2665200	1298200	1320400	1621200	1379500	1523600	1401400	1519100	1270900	--	--
mws1329	463.09	300.7	464.095	C21H20O12	[M-H]-	Quercetin-7-O-glucoside*	Flavonoids	Flavonols	491-50-9	1	13824	8993.2	7729.8	8808.2	11366	24238	24703	6934.8	7416.2	140090	96534	241870	318240	292840	292680	235310	313190	182880	114970	107720	115470	113500	116840	119630	116020	116580	C12639	--
mws0856	463.09	301	464.095	C21H20O12	[M-H]-	Quercetin-4'-O-glucoside (Spiraeoside)	Flavonoids	Flavonols	20229-56-5	1	33874	5085.8	7945	9677.5	49629	51028	31904	16404	12508	202880	143830	254560	125540	139200	149210	304640	244010	273560	197900	134330	181710	212730	250650	174400	235050	195390	--	--
Lmzp002365	465.14	303.09	464.131	C22H24O11	[M+H]+	Hesperetin-7-O-glucoside	Flavonoids	Dihydroflavone	31712-49-9	3	198260	154730	127150	140060	148650	213680	271660	160370	195720	372920	378280	308680	277340	386250	279350	444860	486320	403450	256270	264910	287670	259820	285710	232180	274380	231330	C16422	ko00941
pme1598	463.12	301	464.132	C22H24O11	[M-H]-	Hesperetin-5-O-glucoside	Flavonoids	Dihydroflavone	69651-80-5	3	36316	12952	11862	22634	46256	59429	21542	11857	5090.5	209440	108620	216250	139720	128550	138170	261970	272880	286880	207170	187700	184560	179270	150480	142740	148060	154970	--	--
Lmhp009769	466.29	325.27	465.286	C22H44NO7P	[M+H]+	LysoPE 17:1	Lipids	LPE	-	1	19362	11407	12904	5891.2	4203.2	4710.1	15846	14109	27300	8938.6	7744.5	12134	5631.7	3729.3	18065	10738	13464	10887	51576	50035	47008	43225	48746	46543	48823	49384	--	--
Lmhp009464	466.29	325.27	465.286	C22H44NO7P	[M+H]+	LysoPE 17:1(2n isomer)	Lipids	LPE	-	1	205250	182060	199560	34456	29267	43731	260280	314310	336130	80393	81505	83986	21866	22100	51460	127170	157640	127420	256920	245030	247090	248860	264300	286310	238800	276030	--	--
Xmsn002700	465.13	303.06	466.111	C21H22O12	[M-H]-	Taxifolin-3'-O-glucoside	Flavonoids	Dihydroflavonol	31106-05-5	3	58646	35161	31264	37167	35847	33250	57086	50863	21011	55772	62595	72599	37289	20310	36013	44053	50316	61153	31362	23574	26867	31504	44432	19589	37709	35382	--	--
Lmhp010162	468.31	327.29	467.301	C22H46NO7P	[M+H]+	LysoPE 17:0	Lipids	LPE	-	3	44924	42811	38704	11419	12086	14591	45447	62071	90839	21403	19533	19057	7169.3	5265.9	32750	19599	37069	28076	66961	66756	52769	71834	75594	60079	78239	61724	--	--
pmd0130	468.31	184.07	467.301	C22H46NO7P	[M+H]+	LysoPC 14:0	Lipids	LPC	20559-16-4	1	1166200	1330700	1401400	699850	599350	740840	1624500	2066000	1913700	989590	1009900	1115000	802390	846350	1140300	1049800	1198000	1219300	1154000	1215300	1275500	1243800	1321600	1280800	1257300	1273700	--	--
Hmjn008136	469.33	469.33	470.34	C30H46O4	[M-H]-	Camaldulenic acid	Terpenoids	Triterpene	71850-15-2	2	7044.8	1920.5	806.45	2002.2	7721.3	3209.1	9915.5	1404.8	1622.6	1041.4	1846.3	750.45	537.7	465.19	1171.6	3306.5	1450.6	1278	88529	83433	81122	86175	82153	87505	79919	82459	--	--
pmn001704	469.33	423.33	470.34	C30H46O4	[M-H]-	2,3-Dihydroxy 5(6),12(13)diene ursolic acid	Terpenoids	Triterpene	-	3	173.82	305.32	118.43	111.76	177.37	338.19	118.49	296.69	413.67	176.48	58.88	175.72	87.368	113.22	236.51	243.27	9	174.34	3183.5	4755.8	4387.3	3163.8	3633.1	3921.6	2523.7	3080.5	--	--
Lmsn012627	469.33	423.33	470.34	C30H46O4	[M-H]-	2α,3α-Dihydroxyurs-12,18-dien-28-oic acid	Terpenoids	Triterpene	-	2	172.56	112.2	120.2	58.747	116.42	117.5	87.759	176.34	88.042	112.27	55.44	140.58	119.51	174.64	284.63	234.77	175.46	117.56	3475.2	2517	3329.1	3920.4	2318.4	2997.7	3570.1	3813.3	--	--
Lmmn009932	469.37	469.37	470.376	C31H50O3	[M-H]-	Ambolic acid	Terpenoids	Triterpene	13878-93-8	2	15640	28633	21409	24113	11644	8691.2	18598	21382	19670	19432	12003	9028.7	8925.8	8057.8	7969.6	9524.4	15013	19941	8104.6	8583	11249	9161.9	10390	12443	7722.8	8966.5	--	--
pmn001706	471.35	471.35	472.355	C30H48O4	[M-H]-	2-Hydroxyoleanolic acid	Terpenoids	Triterpene	26707-60-8	2	6317.9	8506.8	2213.4	4173.3	5928.2	7730	15975	15472	8213.2	12462	73646	1250.3	11012	14309	118150	16815	6206.8	47838	56252	58677	64785	62478	56770	62741	49980	49035	--	--
Smpn011792	471.34	471.34	472.355	C30H48O4	[M-H]-	2,3-dihydroxy-12-ursen-28-oic acid	Terpenoids	Triterpene	-	3	997.15	1275	10297	1460.2	3675.5	9534.2	15620	4952.2	7799.4	7233	7194.9	4330.5	7062.5	9823.9	10744	5987	4653.1	5457.8	1211800	1199700	1191100	1228900	1169800	1224700	1158600	1173100	--	--
mws1610	471.35	471.35	472.355	C30H48O4	[M-H]-	Maslinic acid*	Terpenoids	Triterpene	4373-41-5	3	8960	7402	3442.1	5600.7	8180.9	2550.5	9006.9	2201.5	3609.5	6525.4	1350.2	6648.5	17848	6948	2238.8	783.7	4587.6	8439.9	69056	68587	63502	55163	69328	55943	63518	63207	C16939	--
Zmpn008194	471.35	471.35	472.355	C30H48O4	[M-H]-	Corosolic acid*	Terpenoids	Triterpene	4547-24-4	3	11128	6601.3	5391.5	2638.7	11179	4550.7	9043.2	11306	7299	3854.2	5626.9	3330.4	16156	9230.7	502.02	5716.2	4139.3	9517.7	63804	65590	67376	57059	64536	56882	65446	66022	--	--
Lmzn006284	471.35	471.35	472.355	C30H48O4	[M-H]-	2α-Hydroxyursolic acid	Terpenoids	Triterpene	-	2	39711	18356	24199	16532	5154.4	43873	18800	10151	44939	7438.4	71222	36452	115910	20004	107880	22219	104120	44464	47571	49995	48320	53523	48994	60013	45028	41615	--	--
Hmbn005207	471.35	471.35	472.355	C30H48O4	[M-H]-	Hederagenin	Terpenoids	Triterpene	465-99-6	3	2277.6	6789.7	653.37	7925.4	6717.4	11733	12138	10715	1239.5	26011	4290.9	7016.7	5716	7272	10904	9013.9	4908.2	4653.1	1216000	1246100	1261400	1295500	1288000	1310200	1143100	1274300	--	--
Lmzn006169	471.35	471.35	472.355	C30H48O4	[M-H]-	Pomolic acid	Terpenoids	Triterpene	13849-91-7	1	181600	85171	146560	132230	115000	260870	28909	36918	168900	63781	413220	107260	1205900	168620	689340	122870	495250	245890	186950	159210	173480	175490	164490	167310	169480	195490	--	--
pmb1912	474.17	327	473.166	C20H23N7O7	[M+H]+	10-Formyltetrahydrofolic Acid	Alkaloids	Alkaloids	2800-34-2	1	1294100	1762400	1743000	801180	783980	903740	1421100	1628500	1882200	795260	533470	466940	454230	688370	1037200	802590	536930	511000	861010	952890	914240	990550	964970	991520	1069300	969680	C00234	ko00670,ko00970,ko01100,ko01200
Lmhp008233	474.26	333.24	473.254	C23H40NO7P	[M+H]+	LysoPE 18:4	Lipids	LPE	-	3	40133	32382	30974	4709.3	3740.7	5096.2	40593	44341	49414	9514.9	17293	13517	3496.2	1076.7	7453.8	17551	22998	15038	16003	15418	17316	14949	17326	12285	15865	18915	--	--
Lmhp008589	476.28	335.26	475.27	C23H42NO7P	[M+H]+	LysoPE 18:3(2n isomer)	Lipids	LPE	-	1	21873000	20590000	22518000	4374000	3678200	5479500	24150000	28354000	28513000	14081000	15745000	15010000	4029800	3985000	7969200	15273000	17907000	17228000	12819000	13663000	14283000	12761000	14405000	14521000	14122000	14087000	--	--
Lmhp008801	476.28	335.26	475.27	C23H42NO7P	[M+H]+	LysoPE 18:3	Lipids	LPE	-	1	23586000	21707000	21921000	4465000	3729000	5513500	24806000	28177000	28289000	13239000	15776000	14598000	3929000	4156500	7791900	14832000	18046000	17543000	13308000	13369000	14063000	13443000	15090000	14322000	14143000	14753000	--	--
pmp000583	477.1	301.07	476.095	C22H20O12	[M+H]+	Diosmetin-7-O-glucuronide	Flavonoids	Dihydroflavone	35110-20-4	2	2676900	2535000	2942300	1760000	1908200	1729400	1908700	2206800	2248700	661700	786600	753660	227750	254650	329110	676110	781940	705010	2023500	1882600	1939300	1969500	2218400	2307400	2261900	2189700	--	--
pme1683	477.2	258	476.168	C18H32CaN2O10	[M+H]+	Calcium Pantothenate	Others	Vitamin	137-08-6	3	94909	113680	98093	219370	185930	132920	98606	128660	145930	67618	70964	54901	102620	97376	117230	103500	98845	93605	84266	93851	95863	109600	100410	94734	94634	116230	C12276	--
pmb0874	478.29	337.27	477.286	C23H44NO7P	[M+H]+	LysoPE 18:2(2n isomer)	Lipids	LPE	-	1	892520	870420	941150	178040	142490	217210	882670	1078400	1074800	412110	467440	488510	138450	131980	244340	619200	664000	605260	641570	611920	614870	568400	639730	610700	631610	639370	--	--
pmb0881	478.29	337.27	477.286	C23H44NO7P	[M+H]+	LysoPE 18:2	Lipids	LPE	-	1	889950	862970	921820	181670	148610	216890	928690	1080200	1072000	419760	444320	500110	154270	146730	244330	593880	660560	637270	639830	650460	673980	631470	656290	633400	666640	691670	--	--
Hmjp003123	479.08	303.06	478.075	C21H18O13	[M+H]+	Quercetin-5-O-glucuronide	Flavonoids	Flavonols	-	2	1548100	815620	393110	1734200	7603600	6620700	2589900	988310	1314400	9696700	6885400	12220000	20220000	21214000	16339000	10104000	10232000	8264700	7297300	7536700	7439400	7947600	8284100	7801800	8365400	7784600	--	--
Lmmp003783	479.09	303.05	478.075	C21H18O13	[M+H]+	Quercetin-3-O-glucuronide	Flavonoids	Flavonols	22688-79-5	2	2681100	485700	197620	1839000	1356800	2220600	3953800	605840	839430	9	9	9	9	9	9	9	9	9	3744300	4355400	3753800	3875900	3595200	3537000	3641400	4254500	--	--
Zmhn004909	477.06	169.01	478.075	C21H18O13	[M-H]-	3,4-Digalloylshikimic acid	Phenolic acids	Phenolic acids	-	3	18683	1754.2	5872.5	8181.5	51448	44977	14507	6386.5	20358	82253	54944	90576	147420	151190	138360	77726	68998	64472	62152	50746	63078	47342	56759	69224	53848	40246	--	--
Lmfn003760	477.07	301.04	478.075	C21H18O13	[M-H]-	Quercetin-4'-O-glucuronide	Flavonoids	Flavonols	201463-36-7	1	366340	243620	138970	487770	1652200	1658500	638150	255440	325010	2206600	1954900	2872200	5965200	4845200	5222300	2866300	2796200	1757300	2034900	2016400	1882600	2261000	2111600	1819400	1791000	2239900	--	--
Lmqp003647	479.08	303.05	478.075	C21H18O13	[M+H]+	Herbacetin-3-O-glucuronide	Flavonoids	Flavonols	-	1	3536500	135250	99802	2385000	1010100	3960700	3183200	227030	321430	7893500	8000900	8366500	12936000	12427000	14278000	8596200	10079000	10730000	7511400	6314500	6830600	6794700	5831600	5019600	5681400	5561800	--	--
Lmsn003409	477.1	169.01	478.111	C22H22O12	[M-H]-	1-O-Galloyl-6-O-p-Coumaroyl-β-D-glucose	Phenolic acids	Phenolic acids	-	3	14105	11359	10058	1822.9	3658	1833.6	7795.7	14182	4994.1	5065.7	1355.7	893.76	1352.7	922.03	889.2	906.98	891.02	453.95	7522.6	4558.2	5748.6	7257.5	6600.8	9982.9	5056.8	9555.7	--	--
Hmcp002207	479.12	317.06	478.111	C22H22O12	[M+H]+	Isorhamnetin-7-O-glucoside (Brassicin)*	Flavonoids	Flavonols	6743-96-0	1	180330	94422	98372	141860	220260	439010	177270	96539	88865	2152300	1878300	4141400	4557000	6002900	5523900	3120200	2762700	2582400	1409900	1775300	1757500	1407600	1786500	1773900	1799700	1722200	--	--
Lmsn004162	477.1	169.01	478.111	C22H22O12	[M-H]-	1-O-Galloyl-2-O-p-Coumaroyl-β-D-glucose	Phenolic acids	Phenolic acids	94356-18-0	3	16342	8240.2	4059.8	15148	41378	74799	19744	14019	11604	82685	52229	98974	151800	157740	152530	85612	74301	60786	70945	58966	70029	64753	52647	73234	61498	49904	--	--
Lmjp002906	479.12	317.07	478.111	C22H22O12	[M+H]+	Rhamnetin-3-O-Glucoside	Flavonoids	Flavonols	27875-34-9	1	179020	67904	63438	153370	193800	490690	232520	84129	102420	2132400	1649200	4009000	4251900	5539800	6047600	2864200	2555000	2200800	1515900	1657900	1811800	1580500	1626500	1662800	1767800	1625400	--	--
Lmjp003044	479.12	317.06	478.111	C22H22O12	[M+H]+	Isorhamnetin-3-O-Glucoside*	Flavonoids	Flavonols	5041-82-7	1	181880	87033	66705	166200	213930	488030	258600	104260	96151	2136700	1885100	4026400	4414900	5536800	6487800	3033300	2428100	2240800	1572100	1549000	1723800	1599700	1672700	1897000	1757400	1747000	--	--
Lmjp003295	479.12	317.07	478.111	C22H22O12	[M+H]+	6-Methoxykaempferol-3-O-glucoside	Flavonoids	Flavonols	63422-27-5	3	101280	78955	58948	131640	208690	374710	236690	99128	98070	2245200	1840600	3748400	4708700	6084800	6662500	2780900	2399300	2455200	1464700	1531200	1718100	1422700	1627400	1737800	1839800	1641200	--	--
Hmgp002036	479.12	317.06	478.112	C22H22O12	[M+H]+	Nepetin-7-O-glucoside	Flavonoids	Flavonoid	569-90-4	1	121610	71604	44971	122540	204510	529390	220430	128330	104710	2329300	1788200	3703000	4646600	5634200	6377800	2597600	2756300	2355700	1752000	1525400	1718200	1601000	1874200	1742700	1889100	1693700	--	--
mws1454	477.14	315	478.148	C23H26O11	[M-H]-	Persicoside	Flavonoids	Dihydroflavone	28978-03-2	2	1219.5	1307.8	551.41	1435.8	432.79	898.78	1514	1579.6	3499.3	18860	12810	34613	26374	27169	26792	34302	30300	19111	24428	15026	17883	11938	15541	25085	18032	14324	--	--
mws0289	480.31	339.29	479.301	C23H46NO7P	[M+H]+	LysoPE 18:1	Lipids	LPE	89576-29-4	1	15708000	12308000	14406000	2668500	2487800	3734500	15922000	18839000	20027000	6383600	6708800	5264100	1524500	1813800	3261300	10279000	12156000	10680000	9560000	9926400	10247000	9946000	10759000	10763000	10889000	10206000	--	--
pmb0856	480.31	339.29	479.301	C23H46NO7P	[M+H]+	LysoPE 18:1(2n isomer)	Lipids	LPE	-	1	10685000	7955400	9684900	1774300	1682000	2497700	10854000	12465000	13242000	4088500	4382300	3468400	1025800	1097600	1946400	6298700	7980700	6870100	6705100	6281100	6528200	6629500	7083000	7122700	6800500	7086500	--	--
pmb2260	480.31	184.07	479.301	C23H46NO7P	[M+H]+	LysoPC 15:1	Lipids	LPC	-	2	128220	131970	127070	60658	62868	58988	114270	163070	173960	122400	97896	122620	93945	83305	139740	127790	117820	136930	277060	254110	258970	272800	289040	268050	269670	279020	--	--
pmb0883	482.32	341.31	481.317	C23H48NO7P	[M+H]+	LysoPE 18:0	Lipids	LPE	69747-55-3	1	391810	343730	328820	50636	46865	89804	507360	517400	649160	143590	183560	171860	30147	37279	92784	202930	259110	249530	447020	418860	444350	421430	432740	446970	464660	453600	--	--
pmb2319	482.32	184.07	481.317	C23H48NO7P	[M+H]+	LysoPC 15:0	Lipids	LPC	108273-89-8	1	555860	493310	598620	308420	246760	315290	568180	730850	855540	411310	390050	343550	240300	239190	441380	473450	504290	424660	1166300	1077300	1219100	1179100	1273600	1114100	1152000	1175400	--	--
Lmhp009129	482.32	184.07	481.317	C23H48NO7P	[M+H]+	LysoPC 15:0(2n isomer)	Lipids	LPC	-	1	277980	251180	306930	81838	67957	95047	320280	444690	421440	160200	156030	114390	59115	57090	121920	213490	249000	216600	385320	425030	435560	453180	474150	468000	457180	479170	--	--
pmb0880	482.32	341.31	481.317	C23H48NO7P	[M+H]+	LysoPE 18:0(2n isomer)	Lipids	LPE	-	1	216490	156400	180530	34194	31954	45217	200750	241620	261860	80604	83511	68539	19017	21791	42940	132970	159490	140370	129420	121530	129910	120510	122860	142270	139560	122920	--	--
pmb3072	481.14	319.3	482.142	C22H26O12	[M-H]-	3-O-p-Coumaroylshikimic acid-O-glucoside	Phenolic acids	Phenolic acids	-	2	131750	99613	123510	203350	208630	233500	110200	111740	150060	138720	184360	161830	156400	180350	160360	119350	152940	136740	112310	90513	115730	102880	88882	113290	116800	123660	--	--
pmp000444	487.34	469.33	486.335	C30H46O5	[M+H]+	27,28-Dicarboxyl ursolic acid	Terpenoids	Triterpene	-	3	16934	17707	19199	11770	8059.9	9017.3	13653	13823	21477	8474.9	13333	10431	6425.3	8736.7	13116	19028	27558	19320	10594	10904	16669	10529	10464	11758	12330	13181	--	--
Li512114	485.36	453.34	486.371	C31H50O4	[M-H]-	Corosolic Acid Methyl Ester	Terpenoids	Triterpene	4518-70-1	3	177.5	505.74	179.34	204.13	175.09	88.448	615.51	29.072	178.13	179.38	145.44	201.7	149.02	59.392	496.54	118.77	206.32	269.38	2640.4	3391.6	3188.9	4027.4	3630.6	3934.1	3928.5	3982.5	--	--
pmn001342	487.09	283	488.095	C23H20O12	[M-H]-	Rhein-8-O-(6'-O-acetyl)glucoside	Quinones	Anthraquinone	-	2	1987	2510.2	17341	29952	30294	12765	16653	7827.2	20218	7203.2	2379.2	15715	3471	12349	21642	9360.5	3644.8	4361.2	358710	361210	367070	361070	393290	388880	340290	386970	--	--
Zmdn004335	487.09	283.06	488.095	C23H20O12	[M-H]-	Rhein 1-O-(O-acetyl)-glucoside	Quinones	Anthraquinone	-	2	4002.5	15128	5434.2	27945	19027	3678	10233	14533	4597.8	7400.8	7110.8	20790	7987.8	6423	5206.2	17782	18235	15327	21132	18328	15806	17684	21913	14512	26994	12966	--	--
MWSmce613	489.12	264.04	488.107	C14H26N4O11P2	[M+H]+	Citicoline	Nucleotides and derivatives	Nucleotides and derivatives	987-78-0	3	5718.5	6675.7	4290	8101	4762.9	3339	8573.4	8576.6	6672.3	3334.9	6192.7	7150.6	7148.7	10011	8576.6	8097.4	8611.8	7624.2	4765	4288.3	2858	1667.3	5715.1	5718.5	6195.2	8106.2	C00307	ko00564,ko01100
Hmhn007817	487.34	469.33	488.35	C30H48O5	[M-H]-	2α,3α-Dihydroxyursolic acid	Terpenoids	Triterpene	-	3	623.19	1437.8	202.78	134.53	645.63	866.08	1564.7	201.06	203.17	835.53	126.95	255.56	1072.5	1590.7	332.34	530.43	650.76	788.45	1537.6	4118.4	2136.8	3661.6	2131.4	862.28	3197.9	2675.3	--	--
Smpn009230	487.34	487.34	488.35	C30H48O5	[M-H]-	2α,3α,23-trihydroxyolean-12-en-28-oic acid	Terpenoids	Triterpene	-	3	14226	14101	11421	7470	9213.4	8254.6	5693.5	5239.7	7022	4852	9917.5	5414.4	6923.6	4587.1	6871.8	15651	15853	5560.6	27281	26906	25048	33341	36532	37304	23816	28358	--	--
Lmsp005625	491.08	317.03	490.075	C22H18O13	[M+H]+	3-O-Methylellagic acid-4'-O-(5''-O-acetyl)arabinoside	Tannins	Tannin	-	3	3309.5	1852.3	1009.4	1357.9	2404.9	2374.7	3199	2374.3	4244.2	2691.2	4975	4008.2	1154.1	632.57	1357	3819.1	846.18	1350.5	10717	7475.3	5942.9	7231.8	9209.7	7415	4872.9	4981.3	--	--
Lmmn003398	489.11	285.04	490.111	C23H22O12	[M-H]-	Kaempferol-3-O-(6''-acetyl)glucoside	Flavonoids	Flavonols	-	3	39262	56356	61133	5019.5	17038	8198.3	43786	55583	57516	15333	13867	15778	34328	36306	30468	14326	17425	24511	28262	35050	31503	47103	30023	28410	25426	45498	--	--
pma1303	492.31	184.07	491.301	C24H46NO7P	[M+H]+	LysoPC 16:2	Lipids	LPC	-	1	700490	691950	801510	136350	123290	139000	750010	1110400	933120	399830	390650	363600	142790	145500	203720	530890	569790	550470	412600	423430	422270	427810	479330	444060	438190	444600	--	--
pmb0863	492.31	184.07	491.301	C24H46NO7P	[M+H]+	LysoPC 16:2(2n isomer)	Lipids	LPC	-	1	697560	692250	834280	137000	126840	146680	745940	1166700	964240	384250	396590	383680	162010	138330	210930	528270	574340	550670	406450	441200	446960	442880	473010	448280	469800	461910	--	--
Lmhp008833	494.32	184.07	493.317	C24H48NO7P	[M+H]+	LysoPC 16:1(2n isomer)	Lipids	LPC	-	1	5463200	4672500	5311900	1207400	1198000	1394500	5403500	7298300	6653800	2624100	2720000	2622700	1465100	1396200	1781500	3603800	4442900	3800700	3188000	3399500	3783900	3420100	4005500	4100900	4009900	3621100	--	--
pmp001270	494.32	184.07	493.317	C24H48NO7P	[M+H]+	LysoPC 16:1	Lipids	LPC	76790-27-7	1	5121800	4721800	5281600	1252600	1091700	1309900	5393600	7120600	6660200	2430100	2620200	2381200	1439400	1407100	1835900	3342800	3578700	3875500	3195500	3281000	3261400	3271600	3486200	3407100	3450500	3582800	--	--
HJN054	493.21	361.16	494.215	C25H34O10	[M-H]-	Secoisolariciresinol-9'-O-xyloside	Lignans and Coumarins	Lignans	-	3	708920	747980	777520	1142300	1085100	993070	804660	710970	1001800	63737	118630	113450	246920	299780	245260	131370	179590	66162	434310	415240	555580	510670	537700	518670	514820	558290	--	--
pmb0855	496.34	184.07	495.332	C24H50NO7P	[M+H]+	LysoPC 16:0	Lipids	LPC	17364-16-8	1	20680000	18663000	20872000	8814600	6884600	9558100	21309000	24057000	27311000	10686000	10248000	9119400	6019800	6383400	10498000	14504000	14341000	13960000	18211000	18631000	18469000	18708000	19105000	18501000	18172000	19180000	--	--
pmd0132	496.34	184.07	495.332	C24H50NO7P	[M+H]+	LysoPC 16:0(2n isomer)	Lipids	LPC	-	1	22064000	19258000	22139000	9717400	7227100	10148000	22354000	24529000	28850000	11408000	11061000	9675300	6483300	6723300	12022000	15836000	14839000	14567000	18239000	18919000	19219000	19590000	19170000	20022000	19814000	19522000	--	--
Lmhp009349	502.29	361.27	501.286	C25H44NO7P	[M+H]+	LysoPE 20:4(2n isomer)	Lipids	LPE	-	3	2897.3	3062.6	2196.5	661.37	160.4	564.18	2020.6	2359.1	2398.8	1458.8	1622.4	1050.7	1136.4	1060.2	1532.3	1290.1	2184	1692.2	3431.7	2767.2	2555	2665.4	4717.2	4407.4	1710.9	4048.3	--	--
Lmhp009497	502.29	361.27	501.286	C25H44NO7P	[M+H]+	LysoPE 20:4	Lipids	LPE	-	3	76.458	1762.1	2337.4	302.41	76.372	907.2	2530.9	1264.6	2678.4	1342.6	1351	1719.4	372.39	525.96	1374.2	1651.8	2696.7	1975.5	3982.9	2850.6	3260.1	3168.4	4350.5	3757.8	3695.5	3394.2	--	--
Lmhp009802	504.31	363.29	503.301	C25H46NO7P	[M+H]+	LysoPE 20:3(2n isomer)	Lipids	LPE	-	2	87560	73014	86617	16636	14535	21419	90553	115080	127520	38878	38104	43329	14250	17573	26412	45903	57123	44860	53110	50499	49211	51909	52433	54659	55820	54099	--	--
Lmhp010040	504.31	363.29	503.301	C25H46NO7P	[M+H]+	LysoPE 20:3	Lipids	LPE	-	2	91185	77246	92263	17532	13282	21666	103410	129590	124600	42319	42391	45562	13067	15006	25362	50495	59103	50248	57991	55742	53820	54883	60865	55224	56006	58276	--	--
pmn001642	503.08	459.1	504.09	C23H20O13	[M-H]-	Kaempferol-3-O-(2''-O-acetyl)glucuronide	Flavonoids	Flavonols	-	2	76858	55940	55207	69925	74330	56980	40375	50287	50268	67324	67119	79081	62596	52898	72515	47862	58182	58322	79482	76281	52377	84806	67806	70721	66429	6162	--	--
HJAP135	505.12	257.08	504.126	C24H24O12	[M+H]+	Pinocembrin-7-O-(6''-O-malonyl)glucoside	Flavonoids	Dihydroflavone	-	1	2394800	3366600	2733000	4388200	4183200	4422700	3728500	3268000	3096800	3961800	3236900	4947300	5702300	5500800	5786500	2882700	3365000	2988600	3452300	3356000	3531500	3574000	3453200	3513800	3560800	3558000	--	--
pmb3000	503.12	341.1	504.127	C24H24O12	[M-H]-	Chrysoeriol-7-O-(6''-acetyl)glucoside	Flavonoids	Flavonoid	-	2	5423.2	10254	8748.8	6419	9799.8	3648	12687	8437	7888.2	38569	15338	24176	16950	10296	4832.5	25972	42797	54822	19930	13808	11748	13896	15766	12689	15025	24452	--	--
Lmsn002288	503.14	341.09	504.148	C21H28O14	[M-H]-	1-O-Caffeoyl-(6-O-glucosyl)-β-D-glucose	Phenolic acids	Phenolic acids	-	1	479120	307150	275720	259670	303200	258820	563550	282580	276300	359740	399200	613460	322140	401850	608210	458050	577800	526580	571230	623300	540760	636100	624740	668840	541680	657740	--	--
pme2125	503.16	179	504.169	C18H32O16	[M-H]-	Raffinose	Others	Saccharides and Alcohols	512-69-6	3	7845.5	11935	11436	12553	4800	14201	10212	17713	9608.8	11957	6687.8	4184	8201.5	8287	17383	7811.2	2710.8	13640	11209	7510	856.75	9688.8	5400	12136	11874	11950	C00492	ko00052,ko01100,ko02010
Smpn009074	503.34	503.34	504.345	C30H48O6	[M-H]-	2α,3α,19α,23-tetrahydroxy-12-ursen-28-oic acid	Terpenoids	Triterpene	-	2	2610.5	711.22	2133.8	2944	2609.7	1593.6	1056	1885.5	2944.5	2031.5	2435.3	1673.2	1568.5	676.25	2652.2	1341.6	2130.3	1309.5	30137	26644	38180	37529	28163	34829	34090	29743	--	--
Lmhp010757	506.32	365.31	505.317	C25H48NO7P	[M+H]+	LysoPE 20:2	Lipids	LPE	-	1	323310	296670	324390	43457	37216	58625	357450	470290	577840	96119	106540	117400	37047	37013	69422	157380	198980	170070	238900	273370	261030	252810	269310	258910	255410	265810	--	--
Lmhp010514	506.32	365.31	505.317	C25H48NO7P	[M+H]+	LysoPE 20:2(2n isomer)	Lipids	LPE	-	1	328070	277510	321720	38466	33533	53541	348360	473900	549600	86421	110240	107960	41322	32386	61457	153000	193080	174310	246160	246600	256390	236460	257090	267050	244590	241550	--	--
Lmhp008718	506.32	184.07	505.317	C25H48NO7P	[M+H]+	LysoPC 17:2	Lipids	LPC	-	1	430920	409340	462410	96015	93794	106230	425450	556530	510340	182380	183690	202320	97415	87799	112460	257150	300120	310190	258890	268400	278350	269360	324660	311010	288200	298310	--	--
pmb3045	505.1	329.1	506.106	C23H22O13	[M-H]-	Tricin-7-O-Glucuronide	Flavonoids	Flavonoid	-	2	18908	33126	28958	166990	83251	129890	53628	40456	51337	46184	33660	34630	83230	78042	54528	32854	37932	45326	33780	26641	32766	58970	40710	35308	35323	35123	--	--
Hmln002199	505.1	300.03	506.107	C23H22O13	[M-H]-	Quercetin-3-O-(6''-acetyl)galactoside	Flavonoids	Flavonols	-	3	5457	1209.5	9648	3679	9835.8	8564.5	3058	603	1226.5	19830	15777	5709.8	39784	55410	73054	42529	33037	33744	33393	78402	38801	94306	39521	74899	56944	84062	--	--
Lmhp009590	508.34	184.07	507.332	C25H50NO7P	[M+H]+	LysoPC 17:1	Lipids	LPC	-	1	886480	701840	858340	182460	201850	175690	819400	1079700	1109700	362020	335490	256070	188350	149120	224920	588380	659550	668630	512420	548340	535200	518500	592870	582590	582380	606590	--	--
Hmcn000773	507.17	179.05	508.179	C21H32O14	[M-H]-	6'-O-Glucosylaucubin	Others	Others	-	2	80308	178900	152630	209750	321240	235810	125860	163120	132080	183180	250320	200620	579300	611900	158900	190180	202660	201320	125690	130270	148220	152430	156270	132270	140240	144180	--	--
Lmhp010515	510.36	184.07	509.348	C25H52NO7P	[M+H]+	LysoPC 17:0(2n isomer)	Lipids	LPC	-	1	301690	306630	340710	163240	121570	168650	315600	366770	436050	204100	191850	188280	94041	126820	278310	265230	280420	255900	359580	382100	383840	384120	415960	402080	416720	416820	--	--
pmb2406	510.36	184.07	509.348	C25H52NO7P	[M+H]+	LysoPC 17:0	Lipids	LPC	50930-23-9	1	792870	707880	811350	394630	292950	365140	765230	902620	1161900	483120	410760	359270	242820	253690	433770	623380	601050	594360	971000	1006600	1016000	965810	1025000	1059900	1048800	1095400	--	--
Lmhp009773	515.32	261.22	514.314	C27H46O9	[M+H]+	1-α-Linolenoyl-glycerol-3-O-glucoside	Lipids	Glycerol ester	-	1	746740	632390	626050	811560	461010	637420	550160	532700	653060	479900	789000	598670	471170	451450	461840	724820	964200	852920	509740	495510	558340	648290	665430	523630	505430	549000	--	--
Lmhp009526	515.32	261.22	514.314	C27H46O9	[M+H]+	2-α-Linolenoyl-glycerol-1-O-glucoside	Lipids	Glycerol ester	-	1	828400	558310	595580	527310	361340	757480	1002100	685390	757640	486710	722130	597620	414130	498690	597200	768880	912480	700110	531130	593060	693680	608620	509020	554790	537910	777790	--	--
Hmqp006235	516.3	184.07	515.297	C26H46NO7P	[M+H]+	LysoPC 18:4	Lipids	LPC	-	1	314130	305640	379070	47470	44344	39672	362670	503100	454870	70581	81126	98602	63234	28488	73637	127070	168330	201540	136060	123210	140970	149910	162390	138600	113890	154840	--	--
pmn001382	515.12	353.09	516.127	C25H24O12	[M-H]-	Isochlorogenic acid A	Phenolic acids	Phenolic acids	2450-53-5	2	9633.5	2687.2	40693	140140	160650	205710	304680	262900	296540	1046700	1026600	801180	2420	9507	32117	1054500	867000	1215300	150940	137110	139840	136450	162830	157600	140740	139250	--	--
MWSmce346	517.13	163.04	516.127	C25H24O12	[M+H]+	1,3-Dicaffeoylquinic acid	Phenolic acids	Phenolic acids	19870-46-3	3	3898.5	6746.2	4484	23465	35942	42592	108200	147770	133440	673810	632520	500580	6686.6	10438	16371	658120	549500	725100	68642	63323	70930	55897	76074	69176	45746	69203	C10445	--
Li512115	515.12	353.09	516.127	C25H24O12	[M-H]-	Isochlorogenic acid B*	Phenolic acids	Phenolic acids	14534-61-3	2	23823	23379	61473	435070	302960	404000	726100	613320	695210	991840	1253000	982900	1497	12480	16631	1006900	680300	1143600	149860	190310	173530	159470	222470	178170	157580	164810	C10468	--
pmn001384	515.12	353.09	516.127	C25H24O12	[M-H]-	Isochlorogenic acid C*	Phenolic acids	Phenolic acids	57378-72-0	2	15808	15408	56867	468460	369000	421380	767720	705480	542150	1051300	1200900	969390	2217.2	6865.8	13911	846170	677810	1362300	207140	235790	175510	135500	187260	182920	215630	171710	--	--
Lmhp010573	517.34	263.24	516.33	C27H48O9	[M+H]+	1-Linoleoylglycerol-3-O-glucoside	Lipids	Glycerol ester	-	1	39322	28547	32715	37654	32639	48124	28234	24041	33772	25448	43781	17584	36599	27156	33021	21360	37842	30271	35994	32785	36943	44022	32511	34536	28295	42472	--	--
Lmhp010334	517.34	263.24	516.33	C27H48O9	[M+H]+	2-Linoleoylglycerol-1-O-glucoside	Lipids	Glycerol ester	-	1	23930	26475	17386	27409	23921	29808	20881	19590	27823	22284	39259	23311	24557	16771	44337	18299	45170	29753	23061	25875	23811	26788	34507	28220	27521	29011	--	--
pmb0865	518.32	184.07	517.317	C26H48NO7P	[M+H]+	LysoPC 18:3(2n isomer)	Lipids	LPC	-	1	465000	479570	523140	136980	122990	147630	502160	595240	573680	308980	324360	276860	141180	125060	179860	369930	413490	376750	259330	290110	288580	266940	289290	297310	275590	297240	--	--
pmb0854	518.32	184.07	517.317	C26H48NO7P	[M+H]+	LysoPC 18:3	Lipids	LPC	-	1	18387000	17684000	19076000	4772900	4546100	5007000	18719000	22729000	19362000	11575000	11357000	11022000	5089200	5530900	6998700	13377000	14561000	14171000	9215600	9850300	9520800	10474000	11203000	10511000	9935700	11334000	--	--
Zmdn005578	517.1	269.05	518.106	C24H22O13	[M-H]-	Emodin 8-O-(6'-O-malonyl)-beta-D-glucoside	Quinones	Anthraquinone	-	2	12282	12707	13830	22380	11123	12978	7590.1	11289	11325	6892.2	6599.1	16401	6484.7	5953.1	13453	6604.2	8560.4	6813	45036	43120	38968	45542	33371	43264	37619	55353	--	--
Hmbn002692	517.16	175.04	518.164	C22H30O14	[M-H]-	6'-O-Feruloyl-D-sucrose	Phenolic acids	Phenolic acids	118230-77-6	2	27692	24708	29543	38016	36668	63201	54733	32645	33071	52008	38608	27170	62753	32909	222090	46384	53928	46714	130130	122230	157200	112880	137350	124870	119020	132400	--	--
pmp001273	520.34	184.07	519.332	C26H50NO7P	[M+H]+	LysoPC 18:2	Lipids	LPC	-	1	9759900	10625000	9835400	3471200	3392400	3763500	10978000	12051000	11490000	5569900	6134800	6061600	3928300	3381400	4855300	8014400	9121300	8582900	7299800	7338000	7814200	7657100	7875400	7800100	7646300	7516500	--	--
pmp001251	520.34	184.07	519.332	C26H50NO7P	[M+H]+	LysoPC 18:2(2n isomer)	Lipids	LPC	-	1	1018600	1049100	1060400	369840	353910	374750	1050900	1181300	1057400	574430	568580	611810	378760	327320	444340	815780	856460	812040	737750	715160	745800	715980	750310	784390	728170	774260	--	--
pmn001644	519.08	300	520.085	C23H20O14	[M-H]-	Quercetin-3-O-(2''-acetyl)glucuronide	Flavonoids	Flavonols	-	2	8877	2381.5	1080	590.5	7674.5	1193.5	1761	1773.5	2341	26090	27484	49745	59881	29606	28348	47131	52304	22978	17439	10064	21914	19221	19110	15582	15955	27547	--	--
Li512111	519.11	315.05	520.122	C24H24O13	[M-H]-	Isorhamnetin-3-O-(6''-acetylglucoside)	Flavonoids	Flavonols	-	3	4814.4	5005.7	1804.6	2831.1	9236.5	2424.5	1470.7	5000.6	4561	47263	30321	43550	50090	63633	51778	63566	63301	84853	163690	174410	147360	181740	186870	190520	164680	167780	--	--
Cmsp003083	521.2	131.05	520.194	C26H32O11	[M+H]+	Dehydrodiconiferyl alcohol-4-O-glucoside	Others	Others	107870-88-2	1	997350	1530100	1568200	1100500	946680	1288900	1740700	1370300	1460900	1731900	1252700	1972100	931700	1124900	1123400	1360600	1377000	1413300	791260	842870	888920	845720	1027700	903170	891860	972740	--	--
pmn001378	519.19	357.14	520.194	C26H32O11	[M-H]-	Pinoresinol-4-O-glucoside	Lignans and Coumarins	Lignans	41607-20-9	2	125880	88924	85057	17955	6652.2	20006	90285	60480	57133	293840	249240	188310	109880	133870	92214	315790	257440	311630	114810	95288	113860	156800	95708	113710	111040	94914	C17529	--
Lmsp003655	521.2	131.05	520.194	C26H32O11	[M+H]+	Dehydrodiconiferyl alcohol-gamma'-O-glucoside	Phenolic acids	Phenolic acids	-	1	656900	532010	642890	1543800	1369400	1367300	1029200	414300	570340	2780100	2732600	3218900	3509100	2818900	2037500	2584900	2549900	2240800	916680	865740	914210	999160	967560	945820	884350	853460	--	--
pmp001281	522.36	184.07	521.348	C26H52NO7P	[M+H]+	LysoPC 18:1	Lipids	LPC	-	1	20200000	17498000	20453000	4848200	4242700	4722000	19818000	23605000	21137000	9256400	8448500	7257000	2982700	3025000	4084900	14718000	15894000	15205000	9697700	10572000	10810000	11135000	11087000	11606000	11790000	11637000	--	--
Lmhp010190	522.36	184.07	521.348	C26H52NO7P	[M+H]+	LysoPC 18:1(2n isomer)	Lipids	LPC	-	1	597330	512150	593530	127220	115110	128950	581760	696160	604030	249810	218530	204620	82913	79592	108840	410140	451310	424970	286420	300640	300190	296570	321730	312260	317110	319170	--	--
Lmjp003834	523.18	177.06	522.174	C25H30O12	[M+H]+	6-O-p-Methoxycinnamoylcatalpol	Terpenoids	Monoterpenoids	121710-02-9	2	286070	135690	136970	360770	318190	254160	200950	155430	397110	65849	53125	144800	339870	103590	161410	135220	38067	7617.5	217160	98894	221250	224050	240760	281080	276180	458150	--	--
pmd0136	524.37	184.07	523.364	C26H54NO7P	[M+H]+	LysoPC 18:0(2n isomer)	Lipids	LPC	-	1	1291700	1172700	1309600	338540	249610	380940	1271400	1547900	1762900	618770	732800	575530	140050	269490	394840	864630	754710	725220	1014900	1094600	1097500	1116600	1204400	1138500	1190200	1269200	--	--
mws0126	524.37	184.07	523.364	C26H54NO7P	[M+H]+	LysoPC 18:0	Lipids	LPC	19420-57-6	1	7620600	6759900	7433500	2707300	2116300	3076700	7132800	8472700	10497000	3977200	4793800	3845000	1891900	2091600	3286300	5030100	4982500	5097000	6368500	6599900	6712700	6976800	6983100	7322500	7250300	7360700	--	--
pmp001259	526.34	508.33	525.33	C28H47NO8	[M+H]+	5,8,11,14-Pentadecanoamide	Lipids	Free fatty acids	-	2	32826	25480	28550	95403	57840	57655	59143	49448	66503	79198	76560	105430	126310	129040	115270	79586	60436	80534	75314	66630	63902	48263	58039	67924	70412	71208	--	--
Lmhp008924	532.34	184.07	531.332	C27H50NO7P	[M+H]+	LysoPC 19:3	Lipids	LPC	-	2	9537.9	8431	11423	609.84	408.27	1164.6	9012.7	10425	10014	4538.4	6384	3027.9	2119.1	2083.9	4154	5820.5	5884.1	2413.5	4193.4	3332.7	3330.1	4239.6	5513.8	1266.2	4745.4	5687.4	--	--
Lmbn001181	531.14	531.13	532.143	C22H28O15	[M-H]-	Fraxetin-7,8-di-O-glucoside	Lignans and Coumarins	Coumarins	-	2	27179	37623	10023	234600	218690	206350	18025	28070	17383	22651	23464	45577	132650	188730	207110	14212	11871	16019	136930	187460	192730	178500	146170	185770	147690	164360	--	--
Lmhp007840	534.36	184.07	533.348	C27H52NO7P	[M+H]+	LysoPC 19:2	Lipids	LPC	-	2	177990	172920	201750	54227	48953	51424	210260	284930	225100	192770	147360	162070	57986	67857	98499	184920	142800	167340	112270	122850	117400	125590	125950	122420	127750	131800	--	--
Lmhp007598	534.36	184.07	533.348	C27H52NO7P	[M+H]+	LysoPC 19:2(2n isomer)	Lipids	LPC	-	2	162980	220070	201220	224530	219590	227570	224300	310430	381690	28782	23065	22087	25947	25902	42450	45634	39287	36362	168530	170260	183270	171290	179500	177580	171270	175030	--	--
Lmdp004892	535.11	287.05	534.101	C24H22O14	[M+H]+	Kaempferol-3-O-(6''-malonyl)glucoside	Flavonoids	Flavonols	-	1	415450	327130	456350	175940	202940	211750	450570	581800	533910	249080	206260	267890	139440	182670	225430	378590	364570	538590	329670	331680	352090	333830	357330	381860	357460	361840	--	--
pmp000587	535.11	449.1	534.101	C24H22O14	[M+H]+	Luteolin-7-O-(6''-malonyl)glucoside	Flavonoids	Flavonoid	-	1	13887	19744	22284	8319.3	7129	5870.3	31062	33238	27298	7982.5	7119.6	13036	12032	17415	19962	13123	13935	15125	18087	18073	15989	18191	21905	20218	11548	13435	C10103	--
Lmhp010908	536.37	184.07	535.364	C27H54NO7P	[M+H]+	LysoPC 19:1	Lipids	LPC	-	1	255440	221870	244790	57843	58922	57210	226280	306660	314630	106200	105340	85560	53198	50940	62571	152570	190890	185820	258480	220730	223220	208960	245650	255150	290380	251210	--	--
Zmfn000481	535.04	323.03	536.044	C14H22N2O16P2	[M-H]-	Uridine-5'-Diphosphate-D-Xylose	Nucleotides and derivatives	Nucleotides and derivatives	3616-06-6	3	258200	222950	265980	103660	68201	108290	283890	304410	376370	252100	194150	218430	79523	73953	102530	293020	468830	297480	195940	219100	217280	242730	215960	201560	240560	228980	C00190	ko00520,ko00908,ko01100
pmb0824	537.1	177.4	536.153	C25H28O13	[M+H]+	Syringic acid-4-O-(6''-feruloyl)glucoside	Phenolic acids	Phenolic acids	-	3	31814	28553	24466	27474	19325	41584	41516	21668	31977	57165	64208	80052	52491	60862	64704	72849	74511	77831	56580	50924	54281	74065	50815	55168	65320	50273	--	--
pmb2228	538.39	184.07	537.379	C27H56NO7P	[M+H]+	LysoPC 19:0	Lipids	LPC	108273-88-7	1	107420	92920	111390	19632	24122	16740	71707	94561	139260	32113	20670	20910	14640	14403	25230	55275	42509	42662	45079	55502	50833	50704	56483	53518	42638	55052	--	--
pmc0960	544.34	184.07	543.332	C28H50NO7P	[M+H]+	LysoPC 20:4	Lipids	LPC	-	3	6799.3	6677.1	5390.6	2243.3	4483	5303.4	3674.8	5946.5	9019.6	8452.7	9327.7	7593	5008	6060.8	2775.2	12192	13946	10988	19280	21643	19923	22011	24114	20652	23611	22261	--	--
pmp001282	544.34	485.27	543.333	C28H50NO7P	[M+H]+	Propyl 2-(trimethylammonio)ethyl phosphate	Others	Others	-	1	8813600	7405800	8660800	1869300	2134600	2669500	9429600	9896000	8949700	4216500	4163100	3737600	1770800	1765700	2284800	6769700	7104500	6735800	5025300	5224800	5165200	5352100	5570600	5332500	4979400	5318300	--	--
Lmhp009890	546.36	184.07	545.348	C28H52NO7P	[M+H]+	LysoPC 20:3	Lipids	LPC	1199257-41-4	1	483690	464660	470210	139820	131180	143670	487410	675010	566400	272520	268590	290990	194000	183330	212760	314340	346510	332780	229000	257230	261750	282080	267970	268560	268370	293450	--	--
pmd0147	548.37	184.07	547.364	C28H54NO7P	[M+H]+	LysoPC 20:2	Lipids	LPC	-	3	1803100	1858100	2063700	450300	334670	421660	1737900	2550400	2418500	815280	753020	900300	514660	504140	558280	1148600	1352000	1426200	1315700	1348300	1393100	1425600	1464700	1483200	1461000	1496100	--	--
pmd0146	548.37	184.07	547.364	C28H54NO7P	[M+H]+	LysoPC 20:2(2n isomer)	Lipids	LPC	-	3	1844700	1754100	2110800	440780	332440	449830	1710400	2494700	2461900	794860	792170	866980	515200	480090	571570	1126600	1363900	1410800	1273100	1309400	1310500	1333200	1463000	1468000	1515500	1465700	--	--
pmb0608	549.12	301.4	548.117	C25H24O14	[M+H]+	Chrysoeriol-7-O-(6''-malonyl)glucoside	Flavonoids	Flavonoid	-	1	35802	51078	49379	141500	111860	62833	49932	48988	74301	18469	17007	33804	39248	58664	46553	10022	23250	30024	69571	79922	82172	74701	79498	94215	107280	88555	--	--
pmp000588	549.12	463.12	548.117	C25H24O14	[M+H]+	Diosmetin-7-O-(6''-malonyl)glucoside	Flavonoids	Dihydroflavone	-	1	2903.8	1118.5	1773.4	6689.7	5963.1	801.17	486.07	4198.4	6113.4	2941.5	1760.2	4061.9	3550.4	3062.7	8637.6	240.65	721.85	2011.7	3092.9	6114.3	6351.2	4437.6	7174.6	3499.2	2856.9	1285.1	--	--
Lmhp011549	550.39	184.07	549.379	C28H56NO7P	[M+H]+	LysoPC 20:1	Lipids	LPC	-	1	1300200	1104200	1288500	328810	251990	296330	1161300	1606800	1626500	470880	373800	432180	263720	257420	351990	760200	868220	820900	859490	896480	868270	908470	940710	1011700	1021300	935880	--	--
Hmln002189	549.09	505.11	550.096	C24H22O15	[M-H]-	Quercetin-3-O-(6''-malonyl)galactoside	Flavonoids	Flavonols	-	1	15664	2121	11833	14702	17777	16172	24421	12001	9665.5	65991	37734	56836	102280	138910	150120	89327	104590	100890	142520	133780	150040	131290	153150	124330	129970	120860	--	--
pmp000589	551.1	303.05	550.096	C24H22O15	[M+H]+	Quercetin-7-O-(6''-malonyl)glucoside	Flavonoids	Flavonols	-	1	33498	5076.8	19542	22604	31918	27017	24638	22512	21348	123340	60100	87139	162760	212680	210200	127620	144200	189010	221190	202820	242090	214130	224660	257680	242140	209260	--	--
pmb2979	549.12	387.1	550.132	C25H26O14	[M-H]-	Hesperetin-7-O-(6''-malonyl)glucoside	Flavonoids	Dihydroflavone	-	2	63563	51187	81597	33537	33018	28536	70386	66827	59610	29057	28494	32576	25372	44724	45398	23593	35712	18563	48479	36428	52216	55007	24827	37448	48972	65222	--	--
mws1138	551.15	303.04	550.143	C24H26N2O13	[M+H]+	Betanin (Betanidin-5-O-glucoside)	Alkaloids	Plumerane	7659-95-2	3	12696	575.25	7977	6900.8	6487.8	22403	4130.2	4263	5556.5	71165	42648	44654	14250	51692	92592	90537	114440	78437	41858	56398	70722	87077	36415	44456	66504	55326	C08540	ko00965,ko01110
pmd0142	552.4	184.07	551.395	C28H58NO7P	[M+H]+	LysoPC 20:0(2n isomer)	Lipids	LPC	-	3	33015	31698	36972	12564	7590.8	10346	28641	45650	47027	13806	15281	11099	7101.2	6828.5	10286	23153	24279	24960	23910	24182	26778	23193	25494	27276	27498	25123	--	--
pmd0143	552.4	184.07	551.395	C28H58NO7P	[M+H]+	LysoPC 20:0	Lipids	LPC	108341-80-6	3	82541	93928	93597	26860	19644	25671	82684	122120	123410	27789	35080	25502	19212	18269	22622	52613	61672	58529	64547	59701	65153	64252	60628	70457	66066	66009	--	--
Lmmn002260	551.21	389.17	552.221	C27H36O12	[M-H]-	5'-Methoxyisolariciresinol-9'-O-glucoside	Lignans and Coumarins	Lignans	-	2	98124	103750	73515	34175	31183	31234	183800	121050	58360	293790	289550	213660	46402	65665	59194	330960	393040	316270	178930	197690	133770	156070	188360	155790	162550	151500	--	--
Rfmb25702	561.2	357.13	562.205	C28H34O12	[M-H]-	Pinoresinol-4-O-(6''-acetyl)glucoside	Lignans and Coumarins	Lignans	-	3	126750	121390	124650	88487	74227	111250	112320	112090	105890	557870	476150	412580	247760	304190	355370	612800	503820	523050	191330	184040	225610	250890	267590	251820	194320	223010	--	--
HJAP064	565.12	317.08	564.088	C25H24O15	[M+H]+	Isorhamnetin-3-O-(6''-malonylglucoside)	Flavonoids	Flavonols	-	1	1899	8407.8	4581.1	12606	1511	16286	7664.9	6968.9	8516.6	47523	56543	67030	70262	78330	132600	80651	85047	94559	254120	272730	241210	215150	228390	294910	247620	259240	--	--
pmb2922	565.05	323.1	566.055	C15H24N2O17P2	[M-H]-	Uridine 5'-diphospho-D-glucose	Nucleotides and derivatives	Nucleotides and derivatives	133-89-1	1	1251600	1068000	1088800	426750	311820	335740	1252500	1208200	1494900	1261200	926110	1087100	312520	367650	490480	1495100	2231400	1719000	847240	773940	979090	907860	888310	802530	922110	1008200	C00029	ko00040,ko00052,ko00053,ko00240,ko00500,ko00520,ko00561,ko00908,ko01100,ko01110
Lmmp003306	567.13	303.05	566.127	C25H26O15	[M+H]+	Quercetin-3-O-xylosyl(1→2)arabinoside	Flavonoids	Flavonols	-	1	152900	23154	4807	91192	158410	217060	99305	21311	27011	708100	723040	1002500	1395200	1814400	1139100	845930	817720	773970	528820	369320	377710	487660	581440	425820	539570	565820	--	--
Lmhp009682	570.36	184.07	569.348	C30H52NO7P	[M+H]+	LysoPC 22:5(2n isomer)	Lipids	LPC	-	3	259.6	144.21	392.93	214.49	285.12	355.89	216.9	250.93	143.53	143.77	450.59	210.92	283.12	507.93	247.08	285.99	294.17	359.39	3565.3	5259.3	5976.8	5123.1	4468.2	4940.4	2687.2	6174.4	--	--
Lmhp010099	570.36	184.07	569.348	C30H52NO7P	[M+H]+	LysoPC 22:5	Lipids	LPC	-	3	596.44	176.34	147.28	206.76	216.69	179.68	292.71	87.926	308.94	839.65	213.14	464.33	249.56	180.04	185.5	184.64	2047.6	591.39	3608.8	4047	2566.3	4079	5197.6	3281.2	4242.4	3353.9	--	--
pme0430	575.12	285	576.127	C30H24O12	[M-H]-	Procyanidin A1	Tannins	Proanthocyanidins	103883-03-0	3	1189	597	596	5216.2	5299.2	2321	1160.5	606.75	1160.5	2968.8	2960	2359.2	5957.2	618.25	4656	2943	1158.5	2399	6607.8	8784.8	8181.5	8831	7701.2	10111	8743.5	8954	--	--
pme0432	575.12	285.01	576.127	C30H24O12	[M-H]-	Procyanidin A2	Tannins	Proanthocyanidins	41743-41-3	3	20772	30574	11718	81626	75973	89116	40044	10798	56206	109360	98128	175300	155060	210730	193820	88181	122470	83959	112120	124030	109820	98326	125640	94932	123310	87018	C10237	--
Lmpp003930	579.15	271.06	578.142	C30H26O12	[M+H]+	Apigenin-7-O-(6''-p-Coumaryl)glucoside	Flavonoids	Flavonoid	-	3	21191	21409	24844	3850.5	13542	46335	27760	17194	26409	1988.2	10108	6126.2	13784	14536	18485	11153	9333.5	3664.2	28516	25161	26702	19176	32021	24424	11101	18221	--	--
pme0368	579.17	271.01	578.164	C27H30O14	[M+H]+	Apigenin-7-O-rutinoside (Isorhoifolin)	Flavonoids	Flavonoid	552-57-8	3	26222	27627	30686	12875	7335.5	21963	22658	23940	17182	4426.2	7847.8	9	14023	10058	15056	11137	5085.8	10152	11228	22979	23264	14935	18455	15676	17394	19055	--	--
mws0047	579.17	271.07	578.164	C27H30O14	[M+H]+	Apigenin-7-O-neohesperidoside (Rhoifolin)	Flavonoids	Flavonoid	17306-46-6	3	13745	6602.6	5858.8	537.77	12052	33259	9090	3716.5	5971.8	7467.1	7357.5	11841	14946	23428	59862	18175	6212.7	13981	14093	14980	12334	13424	14487	9796.2	10394	12893	C12627	ko00944
pme2493	579.17	287.1	578.164	C27H30O14	[M+H]+	Kaempferol-3,7-O-dirhamnoside (Kaempferitrin)	Flavonoids	Flavonols	482-38-2	3	42164	35735	33983	25163	30547	39084	51742	55015	33260	15552	27019	37396	21116	34578	16770	29299	41118	16381	26836	29822	23862	25497	33381	23997	29880	28872	C16981	--
mws1409	578.9	402.6	580.034	C15H22N2O18P2	[M-H]-	Uridine-5'-diphosphoglucuronic acid	Nucleotides and derivatives	Nucleotides and derivatives	-	3	38038	41134	58160	10702	5113.5	8446	61591	61436	69707	36665	35464	34562	10560	8694.2	12782	60620	55961	49512	24579	39667	28745	26178	30908	28811	25637	32473	--	--
HJAP148	581.15	287.06	580.142	C26H28O15	[M+H]+	Kaempferol-3-O-sambubioside	Flavonoids	Flavonols	27661-51-4	1	9352700	13848000	13361000	24691000	30483000	25369000	11275000	13758000	17170000	1947900	2054100	1485000	1738800	1765700	1457900	1951000	1675600	1801200	6514300	7097700	5560800	6514400	5829900	7108100	6994700	7395600	--	--
MWSHY0056	581.19	273.08	580.179	C27H32O14	[M+H]+	Naringenin-7-O-Rutinoside(Narirutin)	Flavonoids	Dihydroflavone	14259-46-2	2	10165	8660.2	7360	74778	94179	188600	10067	7831.2	15226	19698	22107	30921	101750	145180	250410	34513	2868.8	13284	49733	35160	14717	54908	31889	24812	27550	20769	C09793	--
pmb4486	579.3	267.2	580.312	C29H40N8O5	[M-H]-	Hordatine B	Alkaloids	Phenolamine	10502-21-3	2	64371	48821	58804	239410	195770	248610	59775	46927	64069	48371	52232	67087	189010	256310	197160	30584	31372	32214	74913	77229	88396	74436	88554	76393	84538	85551	C08308	--
Xmzn007677	580.36	506.33	581.264	C33H35N5O5	[M-H]-	Ergotamine	Alkaloids	Plumerane	113-15-5	3	22020000	18217000	21292000	5239800	5621800	5900900	20053000	23308000	20576000	9736800	9139500	8580000	3851300	3754000	4725200	15774000	17590000	15762000	12164000	11645000	11818000	12051000	12341000	11708000	12033000	11990000	C07544	ko01110
pmb0492	584.28	325	583.268	C34H37N3O6	[M+H]+	N',N'',N'''-p-Coumaroyl-cinnamoyl-caffeoyl spermidine	Alkaloids	Phenolamine	-	3	284960	378900	418880	1586900	1505400	1219300	330340	343320	343510	295290	399200	383320	1204600	787250	745100	302840	326600	287780	470490	511600	567640	616290	542180	609010	586850	676760	--	--
Hmgp003641	593.18	447.13	592.177	C28H32O14	[M+H]+	Chrysoeriol-6-C-rhamnoside-7-O-rhamnoside	Flavonoids	Flavonoid carbonoside	-	2	16374	6889.7	5184.7	25655	26448	38901	10894	9631	16952	39066	33284	50875	140460	106790	79732	50058	30844	18255	63074	63675	59389	65926	60783	72918	69920	62214	--	--
pmp001288	593.19	285.1	592.179	C28H32O14	[M+H]+	Acacetin-7-O-rutinoside (Linarin)	Flavonoids	Flavonoid	480-36-4	1	368570	233260	196350	789870	1040900	1247000	297650	226730	276150	1638700	1351800	2115800	6195900	4551700	3058000	2120700	1320000	655950	2294800	2502700	2509500	2747600	2786200	2656900	2519300	2583200	--	--
MWSHY0061	595.16	287.06	594.158	C27H30O15	[M+H]+	Kaempferol-3-O-neohesperidoside	Flavonoids	Flavonols	32602-81-6	1	3393400	2871100	3037600	4870000	4111500	4210200	3955900	3343600	3640800	2556000	3369100	3330900	3479300	2698100	2657000	2864700	2262900	2636200	3066100	2702000	2938400	2599900	3315200	3313900	3223600	2577600	--	--
MWSslk254	595.17	287.06	594.158	C27H30O15	[M+H]+	Kaempferol-3-O-glucorhamnoside	Flavonoids	Flavonols	40437-72-7	1	5101600	4110500	4691700	6440700	6112000	5625100	4998500	4147100	4644200	4122600	4559700	4275200	3933800	3310700	3753800	3670200	3732900	4198700	3654200	3849300	3325000	3444000	3766100	3592100	3808600	4361500	--	--
MWSHY0050	595.17	287.05	594.158	C27H30O15	[M+H]+	Kaempferol-3-O-rutinoside(Nicotiflorin)	Flavonoids	Flavonols	17650-84-9	1	4133600	3602100	3980100	5509400	4060900	4581500	3881900	3212500	3975800	3025900	3902100	3078100	3236700	3024500	2856700	3021900	3434000	3048500	3539100	3366900	3025800	3075000	3163600	3348100	3385200	3414300	C21833	ko00944,ko01110
pmp000593	595.17	449.1	594.158	C27H30O15	[M+H]+	Luteolin-7-O-rutinoside	Flavonoids	Flavonoid	3563-98-2	1	743980	399040	235440	1591000	2099000	1784300	810330	886810	905330	296260	294080	435530	769770	824320	528900	233210	288070	359250	460680	467930	503500	568980	494630	536500	473200	549400	--	--
Lmjp002596	597.14	303.05	596.138	C26H28O16	[M+H]+	Quercetin-3-O-sambubioside*	Flavonoids	Flavonols	83048-35-5	1	3236800	427760	252210	2188600	4214100	6901600	3123900	822140	911020	8652900	7313500	8313900	15524000	16506000	14664000	9303000	12921000	8899500	5477000	4804300	5896600	6098300	7018800	5730200	5979800	6515000	C12637	ko00944
Lmtp004044	597.14	303.04	596.138	C26H28O16	[M+H]+	Quercetin-3-O-apiosyl(1→2)galactoside*	Flavonoids	Flavonols	-	1	3373000	508180	295070	2690600	3986600	5821800	2852000	835250	1130500	8873600	7876700	8252200	15732000	16184000	19020000	9999400	11758000	8458300	6079200	5552500	6050000	6646000	6731700	5641600	5239300	5994900	--	--
mws1519	595.17	287.06	596.174	C27H32O15	[M-H]-	Eriodictyol-7-O-Rutinoside (Eriocitrin)	Flavonoids	Dihydroflavone	13463-28-0	2	2866100	2606100	2495700	3793000	3181300	3385800	2550700	2632900	2656000	2081800	2618900	2844800	2006200	1708100	2626500	2266200	2301700	2661500	2679800	2293000	2655100	2722600	2862400	2793000	3076700	3006800	C09732	--
pmp000277	603.39	453.34	602.382	C35H54O8	[M+H]+	3β-[(Arabinosyl)oxy]-19β-hydroxyurs-12,20(30)-dien-28-oic acid	Terpenoids	Triterpene Saponin	-	2	43143	87539	70994	121530	115760	136370	73105	78537	120760	81059	35707	33485	38768	56983	93324	98688	69834	66974	68894	76748	74064	75569	72753	88596	70486	71618	--	--
Lmqn000780	606.08	384.98	607.082	C17H27N3O17P2	[M-H]-	Uridine 5'-diphospho-N-acetylglucosamine	Nucleotides and derivatives	Nucleotides and derivatives	528-04-1	3	41146	23959	32175	10769	9629.7	10563	33476	39216	46396	38719	22182	19838	7976.9	5097	10945	42766	50659	34396	22294	17500	22031	21086	21624	21993	23120	23501	C00043	ko00520,ko01100
Hmjp003008	609.14	287.06	608.138	C27H28O16	[M+H]+	Luteolin-7-O-glucuronide-5-O-rhamnoside	Flavonoids	Flavonoid	-	1	8446300	6934800	7573900	19311000	19026000	14955000	7792200	7167000	7152600	5064600	4402800	6371400	10816000	18073000	16701000	3537600	4469000	3730300	5942400	7613500	6913400	7563200	7474600	9439800	8007200	8505200	--	--
MWSHY0190	609.18	301.08	608.174	C28H32O15	[M+H]+	Diosmetin-7-O-rutinoside (Diosmin)	Flavonoids	Dihydroflavone	520-27-4	2	94497	206830	59808	116710	142120	101920	49245	74905	100190	411030	50861	220350	695810	425790	199020	111510	149800	41630	188390	204570	199250	277830	267120	193890	206030	209650	C10039	--
MWSslk165	609.18	301.08	608.174	C28H32O15	[M+H]+	Diosmetin-7-O-Neohesperidoside (Neodiosmin)	Flavonoids	Dihydroflavone	38665-01-9	2	110480	243850	99029	179770	163130	146070	61827	105970	107990	547730	77738	267760	851420	539820	242130	170520	186270	48123	262160	236870	259090	217180	236930	274710	296780	274100	--	--
mws0059	609.15	301	610.153	C27H30O16	[M-H]-	Quercetin-3-O-rutinoside (Rutin)	Flavonoids	Flavonols	153-18-4	1	535140	15518	14955	445090	179130	545370	409100	24328	49703	1149100	1226600	1719800	1752500	1604700	1333800	1314400	1487200	1289400	1076900	1224500	1007200	903730	819260	945040	1001700	980320	C05625	ko00944,ko01100,ko01110
Lmbp002336	611.16	303.05	610.153	C27H30O16	[M+H]+	Quercetin-3-O-(2''-O-rhamnosyl)galactoside	Flavonoids	Flavonols	-	2	201900	202960	173350	523470	320580	394290	384480	255640	188860	196420	262790	161640	158610	188680	203890	139020	118870	142750	40655	52989	48169	34472	41741	54854	40480	30864	--	--
Lmjp002461	611.16	303.05	610.153	C27H30O16	[M+H]+	Quercetin-3-O-neohesperidoside	Flavonoids	Flavonols	117611-67-3	1	1288600	75561	49700	1255700	635030	1744200	1345200	99152	135410	5804600	5048700	5876800	6494300	7432400	6519800	4977400	5109700	5121100	2704700	3322300	2864400	3253400	3466100	2895400	3292600	3440200	--	--
Lmyn001269	609.15	285.04	610.154	C27H30O16	[M-H]-	Kaempferol-3-O-sophoroside	Flavonoids	Flavonols	19895-95-5	2	596370	848150	729990	1167000	977390	682570	533100	621030	655840	660610	290760	490920	1030700	854290	408840	476850	403260	286620	310160	300350	371100	349420	277940	299530	306860	302270	C12634	ko00944
MWS0132	611.15	306.07	612.152	C20H32N6O12S2	[M-H]-	Oxiglutatione	Amino acids and derivatives	Amino acids and derivatives	27025-41-8	1	1847600	1753100	1662200	1783900	1535700	1528500	1843000	2444300	2002300	2395100	1791600	2240700	819540	1008100	1117100	2233400	3191900	2563900	1048700	1510000	1774600	1586000	1618400	1545400	1454600	1552600	C00127	ko00480,ko01100
Rfmb26201	621.22	417.16	622.226	C30H38O14	[M-H]-	Syringaresinol-4'-O-(6''-acetyl)glucoside	Lignans and Coumarins	Lignans	-	3	6240.2	7968.4	8414.2	75854	67455	41723	2472	2640.1	15933	7715.5	10409	33549	53946	60656	62953	23739	9972.9	3715	80544	82192	71114	104420	79635	87400	70358	59388	--	--
HJAP120	625.17	317.07	624.168	C28H32O16	[M+H]+	Rhamnetin-3-O-Rutinoside	Flavonoids	Flavonols	-	2	162620	54178	30112	139060	177690	323380	97449	80357	54065	79705	1097400	1610600	3594100	6203900	6559500	1093700	1256900	1218500	1256300	1126600	1363700	1065000	1255300	1090000	1356000	1624600	--	--
Zmxp002867	625.17	301.07	624.168	C28H32O16	[M+H]+	Chrysoeriol-5,7-di-O-glucoside	Flavonoids	Flavonoid	-	3	79566	108250	99255	49758	54864	14486	58706	83966	99052	6828.8	16193	7810.2	8196	2100	6843	9481.5	4222	12740	58238	78194	47971	45902	64218	43377	62328	61850	--	--
Lmmp002963	625.18	317.06	624.169	C28H32O16	[M+H]+	6-C-Methylquercetin-3-O-rutinoside	Flavonoids	Flavonols	-	1	122690	81611	93397	109590	151170	309310	176930	121110	88637	561650	430660	1295700	1465800	5071700	8892400	836610	668980	595530	820610	810670	805140	959090	909530	882600	856430	1029700	--	--
MWSHY0064	625.17	317.07	624.169	C28H32O16	[M+H]+	Isorhamnetin-3-O-neohespeidoside	Flavonoids	Flavonols	55033-90-4	2	47540	44114	40802	131270	148650	330950	138350	45742	71488	1232900	1079800	1457700	3545100	6171300	5649200	1261400	1233300	1338000	1343700	1385100	1225400	1336300	1418500	1394000	1242400	1323600	--	--
Lmsp003939	625.18	317.07	624.169	C28H32O16	[M+H]+	Isorhamnetin-3-O-galactoide-7-O-rhamnoside	Flavonoids	Flavonols	-	1	211900	45419	42987	188250	166250	361550	146210	62646	60671	530890	373390	511500	464070	669750	1658600	669300	424390	565150	857050	671830	738850	990220	918260	756370	833040	848250	--	--
MWSHY0135	625.18	317.08	624.169	C28H32O16	[M+H]+	Isorhamnetin-3-O-rutinoside (Narcissin)	Flavonoids	Flavonols	604-80-8	2	137800	52320	38555	153310	201930	371990	103190	71982	47311	1407600	1050600	1557300	3572300	6803700	6132000	1253300	1714000	1547100	1307200	1553300	1385100	1232300	1630600	1369600	1657100	1577100	--	--
Lmsp004045	625.18	317.07	624.169	C28H32O16	[M+H]+	Isorhamnetin-3-O-glucoside-7-O-rhamnoside	Flavonoids	Flavonols	-	1	359280	47716	39454	383650	310640	507410	272630	58690	107630	446920	421180	815840	564040	752640	1268700	659540	488550	643990	800310	1234300	781390	886490	1198000	945550	1008200	948190	--	--
Hmln002149	623.2	461.17	624.205	C29H36O15	[M-H]-	Acteoside	Phenolic acids	Phenolic acids	61276-17-3	3	57794	64805	80344	64894	48181	90137	53484	47500	55792	29188	13240	13890	28997	38506	25810	18014	20018	14043	63599	55214	41472	44152	43568	39860	36905	32349	C10501	--
MWStz038	625.26	325.11	624.247	C36H36N2O8	[M+H]+	Grossamide	Alkaloids	Phenolamine	80510-06-1	1	92575	354900	73159	107180	51425	89231	77843	157280	1504800	48115	87645	412830	104840	53526	104310	360600	124390	138810	1939400	2125000	2383700	2122700	2293400	2332900	2347600	2429000	--	--
pmp001311	627.16	303.1	626.148	C27H30O17	[M+H]+	6-Hydroxykaempferol-7,6-O-Diglucoside	Flavonoids	Flavonols	-	1	16865	7693.4	1502.3	27943	48777	99018	33211	8346.9	12938	287080	172670	402300	665220	594440	534960	519540	427380	324410	190500	230280	211100	201530	204330	250980	158380	241300	--	--
Lmmp002796	627.16	319.05	626.148	C27H30O17	[M+H]+	Gossypetin-3-O-rutinoside	Flavonoids	Flavonols	-	2	61997	1972.8	8047.5	96867	45578	130220	80507	8378.2	8852.5	480410	419200	499140	648460	854230	676610	499690	460910	384750	120150	174940	207250	227700	170780	212970	187300	230360	--	--
Lmsp003729	627.16	319.05	626.148	C27H30O17	[M+H]+	Myricetin-3-O-rutinoside	Flavonoids	Flavonols	-	1	66710	10517	2502.6	101890	48221	121730	67015	11818	10904	551050	412390	543100	676420	716940	607290	436610	524480	510210	159080	187460	228920	153490	251610	253730	197460	199650	--	--
Lmtp003677	627.16	303.04	626.148	C27H30O17	[M+H]+	Quercetin-3-O-sophoroside (Baimaside)	Flavonoids	Flavonols	18609-17-1	3	114480	93571	74628	107320	199030	115280	170370	95146	109680	87256	42032	37712	59113	115240	229660	59443	84599	78105	65020	82555	75438	83761	98870	69807	65212	79390	C12667	ko00944
pmb0618	627.19	465.1	626.185	C28H34O16	[M+H]+	Hesperetin-8-C-glucoside-3'-O-glucoside	Flavonoids	Flavonoid carbonoside	-	2	2665.5	1719.5	1716.8	10277	21026	7719	18525	4065.2	3977.5	99766	73509	129700	257920	219920	212860	198890	156890	130550	76951	51678	54963	59260	59554	88213	100550	78011	--	--
Hmlp002975	639.15	493.1	638.139	C28H30O17	[M+H]+	Isorhamnetin-3-O-glucuronide-7-O-rhamnoside	Flavonoids	Flavonols	-	3	13328	2288.8	3534	10406	26435	34450	3523.5	2926.2	4045.2	54360	61031	129560	249910	328200	373140	74915	107480	68201	60935	91796	87093	72730	108560	92363	84075	85773	--	--
Hmgn002038	637.18	475.14	638.184	C29H34O16	[M-H]-	β-Oxoacteoside	Phenolic acids	Phenolic acids	-	3	10072	38791	15722	26528	42911	37716	27977	12270	17100	63629	113690	87130	88659	105700	104770	70463	74496	53438	34200	45323	35747	50757	43572	41894	53339	63295	--	--
Lmmp002560	641.13	303.05	640.128	C27H28O18	[M+H]+	Quercetin-3-O-(2''-O-glucosyl)glucuronide	Flavonoids	Flavonols	-	3	30645	4738.2	3078.8	9048.3	28985	51417	11182	11260	11712	79475	102140	164300	288560	306440	269530	96829	85468	64012	119730	135610	166700	141130	123750	162590	112990	147740	--	--
Hmcp001578	641.17	479.11	640.163	C28H32O17	[M+H]+	Isorhamnetin-3,7-O-diglucoside	Flavonoids	Flavonols	6758-51-6	3	3787.2	2236.5	2251.1	3213.6	1862.9	25512	1761.3	4789.7	2153.3	38809	30434	46670	85099	115830	83147	70281	53079	51106	80262	74959	96838	96016	107720	93145	103720	99683	--	--
Lmsp003252	641.17	317.07	640.164	C28H32O17	[M+H]+	Isorhamnetin-3-O-sophoroside	Flavonoids	Flavonols	-	2	9239.9	745.6	1762	1776.5	2735.8	29134	6976.1	7611.4	2579.1	63849	45763	73086	175490	175990	147260	97784	123130	82785	127940	124560	155130	128040	163530	152520	161340	133270	--	--
mws1506	639.19	161	640.2	C29H36O16	[M-H]-	Plantamajoside	Phenolic acids	Phenolic acids	104777-68-6	1	17741	17735	19887	43762	32036	46665	10898	14224	24703	38965	41700	37758	28584	31636	40362	31632	21301	20413	36694	35032	30426	34014	30334	30637	26403	24887	C10485	--
pmb0530	664.12	136.2	663.109	C21H27N7O14P2	[M+H]+	Nicotinic acid adenine dinucleotide	Nucleotides and derivatives	Nucleotides and derivatives	53-84-9	1	895280	896110	1049200	448130	352110	453600	936920	1193800	1117700	828050	904190	987120	376270	453800	480450	1304400	1498200	1150700	572140	591970	658250	813070	671710	724630	643900	658200	C00003	ko00190,ko00730,ko00760,ko01100
Hmqp003184	667.15	287.06	666.143	C29H30O18	[M+H]+	Luteolin-7-O-(6''-malonyl)glucoside-5-O-arabinoside	Flavonoids	Flavonoid	-	3	218210	168670	166970	187370	171850	199670	147480	139590	211900	84231	134590	100430	28396	41366	44016	60490	83412	114310	135560	110720	133260	127700	142940	133170	145320	144880	--	--
Lmhp008744	677.37	261.22	676.367	C33H56O14	[M+H]+	1-α-Linolenoyl-glycerol-2,3-di-O-glucoside	Lipids	Glycerol ester	-	1	248810	259350	272350	274520	235160	264500	344970	525430	489170	210260	440150	328750	220330	143810	373710	313750	409180	347900	340050	228020	229120	492390	278600	373690	310710	382060	--	--
Lmhp008513	677.37	261.22	676.367	C33H56O14	[M+H]+	2-α-Linolenoyl-glycerol-1,3-di-O-glucoside	Lipids	Glycerol ester	-	1	281420	372080	251360	320500	273230	336340	376030	299890	423260	181490	307780	212030	283360	154530	329000	284760	361760	329050	282160	202680	259850	307260	240100	265710	305900	347770	--	--
Lmhp009384	679.39	263.24	678.383	C33H58O14	[M+H]+	1-Linoleoylglycerol-2,3-di-O-glucoside	Lipids	Glycerol ester	-	1	27150	39957	25150	47485	43077	177240	30220	40458	34562	35302	68039	46746	57910	41025	75099	15664	45608	29550	36276	35461	64874	51089	63102	53937	35406	40201	--	--
Lmhp009190	679.39	263.24	678.383	C33H58O14	[M+H]+	2-Linoleoylglycerol-1,3-di-O-glucoside	Lipids	Glycerol ester	-	1	22458	24494	29830	58792	57217	108310	28747	27865	38858	33764	48075	61069	86113	98078	69787	21480	29617	20841	38608	38463	40484	40260	38487	62517	59409	59765	--	--
Hmlp003185	681.17	287.05	680.159	C30H32O18	[M+H]+	Luteolin-7-O-(6''-malonyl)glucoside-5-O-rhamnoside	Flavonoids	Flavonoid	-	3	145470	121800	141550	260390	134650	108750	127760	110860	206750	27326	24698	30556	22745	38090	31293	28022	21098	24793	42330	78768	55140	67301	58165	54082	87894	83988	--	--
Lmsn006130	679.37	517.32	680.377	C36H56O12	[M-H]-	2α,3β,19α-Trihydroxyurs-12-en-23,28-dioic acid-28-O-glucoside	Terpenoids	Triterpene Saponin	-	3	17594	15981	23021	10896	11481	20131	17942	22944	15371	37845	50346	55593	25778	23462	33431	36657	52629	47104	17915	22371	21339	31406	20776	21378	28366	22540	--	--
Lmmp003266	683.15	303.05	682.138	C29H30O19	[M+H]+	Quercetin-3-O-(2''-malonyl)glucoside-7-O-arabinoside	Flavonoids	Flavonols	-	3	25301	5976	1777.5	21049	4810	20120	11804	2987.5	10004	99920	106020	81149	69658	90055	99343	122660	141690	126770	107720	116710	99321	135170	119040	127550	99410	103600	--	--
pmn001370	681.24	519.19	682.247	C32H42O16	[M-H]-	Pinoresinol-4,4'-O-di-O-glucoside	Lignans and Coumarins	Lignans	63902-38-5	2	214780	308090	326670	333070	276690	416930	441500	313780	383860	161080	182770	236210	154720	139000	191760	163080	149600	187570	265840	199800	167590	144390	167420	148990	172920	199990	--	--
Xmyp004678	727.21	287.05	726.201	C32H38O19	[M+H]+	Kaempferol-3-O-(2-O-Xylosyl-6-O-Rhamnosyl)Glucoside	Flavonoids	Flavonols	-	1	6045000	8359300	6733600	11100000	11370000	9587500	5709200	8123400	8653800	265860	308200	246990	450800	390440	498810	233470	194880	277290	1579300	2040800	1818900	1945100	1933300	1922300	1595200	1738900	--	--
Zmlp003063	741.23	433.12	740.209	C33H40O19	[M+H]+	Luteolin-7-O-(2''-O-rhamnosyl)rutinoside	Flavonoids	Flavonoid	-	2	513810	651670	608020	1240800	1185400	1148400	563770	625510	715640	82231	66120	88084	127330	111000	101880	67969	83379	82543	292230	322130	330710	336480	351100	344320	367050	348660	--	--
Hmmn003584	739.19	593.14	740.209	C33H40O19	[M-H]-	Luteolin-7-O-rutinoside-5-O-rhamnoside	Flavonoids	Flavonoid	-	2	27333	36890	34424	31149	22571	31989	45812	43517	39842	468.77	1458.9	846.85	439.25	1013.2	573.79	1121.2	450.15	1003	12088	12255	11363	14595	11808	10310	11636	10529	--	--
mws1035	741.22	433	740.216	C33H40O19	[M+H]+	Kaempferol-3-O-robinoside-7-O-rhamnoside (Robinin)	Flavonoids	Flavonols	301-19-9	2	444020	498940	502940	1201500	1120100	1092500	492000	493170	650650	63597	52508	79084	114240	108090	102900	68726	67142	71742	289580	226910	308350	284350	297660	285440	311460	320620	C10178	--
Lmsp003881	741.22	287.06	740.216	C33H40O19	[M+H]+	Kaempferol-3-O-rutinoside-7-O-rhamnoside	Flavonoids	Flavonols	-	1	21223000	23990000	19904000	42817000	36518000	39318000	22632000	26243000	22360000	2803800	2636500	3081200	4801600	4289000	4192600	2877900	2461800	3062500	14040000	12063000	10970000	12418000	14532000	12887000	14508000	13191000	--	--
Hmcp001618	743.2	449.1	742.195	C32H38O20	[M+H]+	Quercetin-3-O-(2''-O-Xylosyl)rutinoside	Flavonoids	Flavonols	129235-39-8	3	67667	107510	91604	177170	131710	163380	76762	97445	108490	8241.8	9904.5	16025	14876	12315	9504.7	10268	12839	14475	49187	40808	48509	57860	42713	54946	68471	61372	C10175	ko00944
HJAP061	743.2	303.05	742.195	C32H38O20	[M+H]+	Quercetin-3-O-(2''-O-arabinosyl)rutinoside	Flavonoids	Flavonols	-	1	876000	56083	46681	469070	339470	1477400	585100	125600	169130	1837600	1367000	1401500	2468200	3612100	4147800	2194600	2363900	2416200	1035100	1237400	1271100	1445100	1445200	1195200	1405800	1256300	--	--
Hmqp002870	743.2	287.06	742.196	C32H38O20	[M+H]+	Luteolin-7-O-Sophoroside-5-O-arabinoside	Flavonoids	Flavonoid	-	2	1053500	1079900	1178700	2586800	2745100	2882700	998540	1079600	1365600	104180	107250	141680	201680	169530	207220	112420	147300	197370	637190	767840	520580	696690	637930	717330	690340	717470	--	--
pme2651	742.1	620.1	743.075	C21H28N7O17P3	[M-H]-	NADP (Nicotinamide adenine dinucleotide phosphate)	Nucleotides and derivatives	Nucleotides and derivatives	53-59-8	3	991220	809940	789780	123540	67333	167180	730840	783760	734530	923370	1090200	744580	63150	86857	105280	1050000	1260400	991830	341290	477510	547680	477060	528490	398250	393230	404650	C00006	ko00195,ko00480,ko00760,ko01100
Lmyp003857	753.13	287.06	752.122	C35H28O19	[M+H]+	Kaempferol-3-O-(2'',6''-digalloyl)glucoside	Flavonoids	Flavonols	-	2	375410	495560	582020	444650	437560	476520	524600	538230	553110	6181.9	3480	7228.8	8428.4	4835.2	12744	1680.8	5113.7	5880.4	205960	243760	199560	267890	294110	287610	221330	288300	--	--
MWSslk184	753.23	205.05	754.232	C34H42O19	[M-H]-	3,6'-Disinapoyl sucrose	Phenolic acids	Phenolic acids	139891-98-8	2	26194	18574	15226	21447	21516	13126	8246.5	18695	16026	45264	28416	63550	20492	19065	31091	85951	72262	50984	37131	27179	27061	27400	23498	32749	26585	24967	--	--
pmp001105	757.22	287.06	756.211	C33H40O20	[M+H]+	Kaempferol-3-O-neohesperidoside-7-O-glucoside	Flavonoids	Flavonols	-	3	8399.7	9171.8	17616	4746.1	4484.4	22671	14628	9451.5	9514.8	73092	85407	65944	189440	233620	187580	77956	100290	66155	79137	67971	78555	80145	78353	65556	69639	79226	--	--
Lnrp102163	757.21	303.05	756.211	C33H40O20	[M+H]+	Quercetin-3-O-rutinoside-7-O-rhamnoside	Flavonoids	Flavonols	-	3	66645	16884	15222	78037	62409	57136	101560	16260	31460	64144	84021	143320	89502	100120	65208	63779	66104	50840	28783	31619	18789	18176	52985	39156	22515	28600	--	--
pmb0639	757.22	595.2	756.211	C33H40O20	[M+H]+	Apigenin-8-C-glucoside-7-O-Sophoroside	Flavonoids	Flavonoid carbonoside	-	3	2828.8	2218.6	1421.4	699.26	2688.7	2552	2919.2	979.13	6930.1	17112	19897	13924	47916	61809	41801	19930	16356	15486	17410	21982	17124	16705	6529.3	15010	15698	15181	--	--
Zmgp002857	757.22	303.05	756.211	C33H40O20	[M+H]+	Quercetin-3-O-rhamnosyl (1→2)-[rhamnosyl (1→6)]glucoside	Flavonoids	Flavonols	-	2	1412400	108240	97162	1095700	1222000	2131200	1010300	176740	178950	6981900	6536200	6439000	8893200	10521000	12689000	6784800	6153600	6790200	3628700	3974700	3919300	4274800	4018200	3606700	2826600	4418600	--	--
Hmcp001559	757.22	317.06	756.211	C33H40O20	[M+H]+	Isorhamnetin-3-O-rutinoside-7-O-arabinoside	Flavonoids	Flavonols	-	3	1226.7	1221.3	306.05	614.14	455.06	607.66	612.1	1828.2	300.93	7680.3	8581.6	2410.8	18770	12069	12212	5261.6	6151.9	4901.2	6180.9	6387.6	5787.9	7992.7	8233.2	4638.7	5863.3	4855	--	--
Lmsp003161	757.22	287.06	756.211	C33H40O20	[M+H]+	Kaempferol-3-O-sophoroside-7-O-rhamnoside	Flavonoids	Flavonols	-	2	258270	385660	423630	763230	498130	476250	440640	438960	488970	6284.8	7215.7	11797	13337	2896.3	10418	10011	8289.2	14351	126410	142890	139660	131950	149680	157680	152560	148670	--	--
Lmpp003268	757.22	287.06	756.211	C33H40O20	[M+H]+	Kaempferol-3-O-rutinoside-7-O-glucoside	Flavonoids	Flavonols	-	3	61860	24838	58960	90784	39914	48956	23098	31795	32776	25483	46406	59353	11157	40051	41886	15141	19941	40904	63731	54772	86286	78109	75311	84854	70261	61874	--	--
HJAP127	757.22	303.05	756.212	C33H40O20	[M+H]+	Quercetin-3-O-(2''-O-Rhamnosyl)rutinoside	Flavonoids	Flavonols	55696-57-6	1	1271600	125950	102000	953680	1155100	2631600	1249700	143140	169890	6620400	5582700	5784100	7774000	11737000	10819000	6101600	6067300	6178300	3693000	3531700	3303400	3815400	4218000	4107600	3773200	3302100	--	--
Hmcp001329	759.2	303.05	758.191	C32H38O21	[M+H]+	Quercetin-3-O-xylosyl(1→2)glucosyl(1→2)glucoside	Flavonoids	Flavonols	-	1	4491.2	261.95	252.22	251.56	1990.9	6293.9	372.69	238.15	251.43	13477	14439	6584.8	13720	26376	25174	18792	23896	12223	3258.6	7008.2	8214.4	9203.8	13057	14779	4914.7	11299	--	--
pmp000279	765.44	435.33	764.435	C41H64O13	[M+H]+	3β-[(Arabinosyl)oxy]-23-hydroxyurs-12,19(29)-dien-28-oic acid 28-glucosyl ester	Terpenoids	Triterpene Saponin	-	1	6689.1	17981	13382	17912	9334.7	13722	17742	14293	27166	18415	11839	8896.7	15363	7733.2	19344	21119	19764	20438	13676	14927	15517	10900	22134	23043	9956.8	16316	--	--
pmn001505	763.43	763.4	764.435	C41H64O13	[M-H]-	Oleanolic acid-3-O-xylosyl(1→3)glucuronide	Terpenoids	Triterpene Saponin	-	2	170190	293020	253700	253830	241140	290930	230040	247020	341580	340490	215790	148000	297590	726490	833800	413870	343960	305240	2954900	2854400	2810900	2994700	2965200	2775100	2815100	2851000	--	--
Cmhp005457	767.46	455.35	766.45	C41H66O13	[M+H]+	HN-saponin F;Pulsatilla saponin B；3-O-α-L-Arabinosylhederagenin-28-β-D-glucoside	Terpenoids	Triterpene Saponin	39524-13-5	2	28835	48682	51451	68691	43195	43838	37100	48866	38763	22558	10762	12888	9782.5	10194	18731	24335	24828	22249	20657	29448	26068	28572	25696	23567	23912	25567	--	--
Lmyp003588	769.12	303.05	768.118	C35H28O20	[M+H]+	Quercetin-3-O-(2'',6''-digalloyl)-glucoside	Flavonoids	Flavonols	-	3	100100	6680.1	4432.6	34032	22752	35809	54699	17068	11232	2678.1	2685.6	3536	3588.9	5901.6	7202.8	4493.2	8515.4	1343	55607	72728	73645	61463	63055	84572	76213	90029	--	--
HJAP128	771.23	317.06	770.227	C34H42O20	[M+H]+	Isorhamnetin-3-O-rutinoside-7-O-rhamnoside	Flavonoids	Flavonols	-	1	201590	58196	38830	246110	329710	443710	239280	76751	106970	466090	545850	430410	504020	903820	1446900	692790	510940	718660	952760	975430	1035900	917810	873060	872320	1054400	1030100	--	--
Lmsp002982	773.21	303.05	772.206	C33H40O21	[M+H]+	Quercetin-3-O-sophoroside-7-O-rhamnoside	Flavonoids	Flavonols	-	2	18087	3417.5	736.82	17812	37818	61675	23099	2697.5	8524.6	73813	54833	64313	111780	124330	143460	116800	69488	70684	37849	49559	45847	40886	42761	46650	41845	42777	--	--
Lmmp002334	773.21	303.05	772.206	C33H40O21	[M+H]+	Quercetin-3-O-rutinoside-7-O-glucoside	Flavonoids	Flavonols	-	2	29255	9	9	21213	8289.5	47996	21948	4006.8	9	134880	168720	227520	268240	269170	246940	121810	131370	127940	108600	109150	86054	91787	122620	100450	116260	113600	--	--
Lmmp002755	773.21	303.05	772.206	C33H40O21	[M+H]+	Quercetin-7-O-rutinoside-4'-O-glucoside	Flavonoids	Flavonols	-	3	45349	3360	522.5	41780	18502	46295	50746	8359.5	4500.8	322440	291390	379800	227920	270030	268530	314190	326820	287380	97220	121780	144830	127170	128560	116280	97517	114780	--	--
Hmmp006067	798.5	439.36	780.467	C42H68O13	[M+NH4]+	Oleanolic acid-3-O-glucosyl(1→2)glucoside	Terpenoids	Triterpene Saponin	-	2	9	9	1987.4	1576	1058.5	3342.6	2088.9	9	2343.3	1757.5	1665.4	993.51	13089	19434	20560	6665.9	4614.1	2332.1	13069	15611	16259	18304	13782	17878	19248	14791	--	--
pme2746	784.15	437	785.157	C27H33N9O15P2	[M-H]-	Riboflavin 5'-Adenosine Diphosphate	Nucleotides and derivatives	Nucleotides and derivatives	146-14-5	1	3903800	3468700	3712100	3230700	2082200	3481100	3671600	3816200	4360800	3560000	3641400	3209600	2144000	2220800	2134400	4299900	4012300	3906400	2553300	2845400	2959000	2669000	2916400	2851300	3159900	2701400	C00016	ko00740,ko01100,ko01110
Hmcp001589	787.23	317.06	786.221	C34H42O21	[M+H]+	Isorhamnetin-3-O-rutinoside-4'-O-glucoside	Flavonoids	Flavonols	111393-97-6	3	1668.9	1549.1	308.37	1224	931.64	10288	4600.5	925.11	2071.8	36332	31997	31407	104250	464490	862180	49863	60455	27483	46511	36825	43669	50935	43679	42645	50515	48300	--	--
pmb0620	787.23	625.1	786.222	C34H42O21	[M+H]+	Chrysoeriol-6,8-di-C-glucoside-7-O-glucoside	Flavonoids	Flavonoid carbonoside	-	2	4205.9	9823.2	4438	9797.6	4061.4	4922.7	24970	13254	17672	10789	11141	23483	30741	23298	20105	18239	19136	18074	9433	9874.1	10796	8762.9	11019	17352	11708	11292	--	--
Lmhp003162	787.23	625.17	786.222	C34H42O21	[M+H]+	Chrysoeriol-6,8-di-C-glucoside-4'-O-glucoside	Flavonoids	Flavonoid carbonoside	-	3	5299.7	3328.3	4627.4	2141	2562.5	529.82	4214.2	1754	3811.2	11973	19871	7213.2	19251	26727	11544	23158	17647	14280	4836.2	14206	10210	19405	11996	17202	10701	15456	--	--
pmn001535	787.1	465.1	788.107	C34H28O22	[M-H]-	1,3,4,6-Tetra-O-Galloyl-D-Glucose	Tannins	Tannin	-	3	5129	10650	8735	10726	9239	16310	6982	7885.2	11209	14370	19472	26882	23132	21679	15831	18562	13963	5602	8861.8	5590.2	8725.8	9346.8	10685	8817.5	8276.8	7963.5	--	--
Lmwp005248	903.26	287.06	902.248	C42H46O22	[M+H]+	Kaempferol-3-O-(6'''-p-Coumaroyl)glucosyl-(1→2)-Glucoside-7-O-Rhamnoside	Flavonoids	Flavonols	-	2	63083	109820	124170	113880	85706	102700	106470	125990	111250	285.19	288.86	213.1	714.21	434.93	1798.3	434.21	571.27	436.13	29783	31225	30191	37552	39971	40935	37051	31769	--	--
Zmcn006984	911.5	749.45	912.508	C47H76O17	[M-H]-	Hederagenin 3-O-[β-D-glucosyl-(1-3)-a-L-rhamnopyransyl-(1-2)-a-L-arabinoside]	Terpenoids	Triterpene Saponin	-	2	74.005	9	75.973	150.63	9	150.96	145.63	70.397	510.47	72.857	159.57	151.33	72.734	218.98	224.06	73.8	227.26	148.01	1250	1672.4	869.41	1091.1	1530.4	1310.3	1973.6	1173.8	--	--
HJAP136	919.27	303.05	918.264	C39H50O25	[M+H]+	Quercetin-3-O-(2''-O-rhamnosyl)rutinoside-7-O-glucoside	Flavonoids	Flavonols	-	3	499.66	255.97	242.96	1239.8	746.9	1234.7	252.97	498.8	268.12	5541.3	3266.9	4794.2	2235.4	4225.3	11131	5658.5	6886.9	2224.4	5148	4691.8	2357.2	5971.5	2228.8	4012.9	3951.3	2203.9	--	--
Lmhp002374	919.27	303.05	918.264	C39H50O25	[M+H]+	Quercetin-3-O-glucosyl(1→4)rhamnoside-7-O-rutinoside	Flavonoids	Flavonols	-	3	891.12	454.09	429.98	452.95	2655	4509.2	895.06	902.35	452.73	18965	13608	11672	14051	15353	18878	17588	22582	22715	8142	6747.7	6786.5	9471.5	7218.7	6726.2	4052.8	8077.1	--	--
HJAP123	933.28	479.12	932.28	C40H52O25	[M+H]+	Isorhamnetin-3-O-rutinoside-7-O-rutinoside	Flavonoids	Flavonols	-	3	3897.3	4607.1	301.71	5096.4	11998	35042	8264.6	1706.4	2677.7	24383	26105	32451	55694	64161	59307	30560	40935	40845	22391	20538	19849	24889	25554	27022	31704	25500	--	--
MWS20196	953.09	301	954.097	C41H30O27	[M-H]-	Chebulagic acid	Tannins	Tannin	23094-71-5	2	131850	55823	18000	198580	1400000	1190400	308850	76711	151410	1915900	1375200	2401600	4884500	4420300	4081300	2247200	2177500	1338300	1662300	1714000	1780500	1622500	1829300	1886300	1895000	1792500	C10214	--
Lmxn007617	955.49	793.44	956.498	C48H76O19	[M-H]-	3-O-Rhamnosyl(1→2)glucosyl-2β,3β-dihydroxy-23-oxoolean-l2-en-28-oic acid-28-O-glucosyl ester	Terpenoids	Triterpene Saponin	-	1	2105.1	1579.9	1805.3	2417.2	1593.8	2935.4	2289.4	751.04	1981.6	521.86	747.8	832.95	380.26	685.33	222.13	1143.4	1215.9	748.51	1655.4	1122.6	907.44	1356.8	761.47	1272.1	148.3	1657.9	--	--
