# Supplementary material for: Transcriptome and Metabolome Analyses Revealed the Response Mechanism of Quinoa Seedlings to Different Phosphorus Stresses
Source: Int J Mol Sci. 2022 Apr 24;23(9):4704. doi: 10.3390/ijms23094704 (PMC9105174; doi:10.3390/ijms23094704)
Supplement: Supplementary file 1 [file ijms-23-04704-s001.zip › Table.S5.xlsx]

## Sheet: Sheet1
Table S5. Common metabolites in glycerolipid metabolism for CK vs. HP and CK vs. LP.
R2 VS. R4
Index	Formula	Compounds	Class I	Class II	Type
Zmzn000078	C3H7O6P	Dihydroxyacetone phosphate	Others	Saccharides and Alcohols	down
Zmgn000447	C3H7O7P	3-Phospho-D-glyceric acid	Others	Saccharides and Alcohols	down
mws1090	C6H13O9P	Glucose-1-phosphate*	Others	Saccharides and Alcohols	down
pmb2922	C15H24N2O17P2	Uridine 5'-diphospho-D-glucose	Nucleotides and derivatives	Nucleotides and derivatives	down
R2VS.R5
Index	Formula	Compounds	Class I	Class II	Type
Zmgn000447	C3H7O7P	3-Phospho-D-glyceric acid	Others	Saccharides and Alcohols	up
mws1090	C6H13O9P	Glucose-1-phosphate*	Others	Saccharides and Alcohols	up
W2VS.W4
Index	Formula	Compounds	Class I	Class II	Type
Zmzn000078	C3H7O6P	Dihydroxyacetone phosphate	Others	Saccharides and Alcohols	down
Zmgn000447	C3H7O7P	3-Phospho-D-glyceric acid	Others	Saccharides and Alcohols	down
mws1090	C6H13O9P	Glucose-1-phosphate*	Others	Saccharides and Alcohols	down
pmb2922	C15H24N2O17P2	Uridine 5'-diphospho-D-glucose	Nucleotides and derivatives	Nucleotides and derivatives	down
W2VS.W5
NONE
