# Supplementary material for: Transcriptome and Metabolome Analyses Revealed the Response Mechanism of Quinoa Seedlings to Different Phosphorus Stresses
Source: Int J Mol Sci. 2022 Apr 24;23(9):4704. doi: 10.3390/ijms23094704 (PMC9105174; doi:10.3390/ijms23094704)
Supplement: Supplementary file 1 [file ijms-23-04704-s001.zip › Table.S6.xlsx]

## Sheet: Sheet1
Table S6. Common metabolites in the glycolysis/gluconeogenesis pathway for CK vs. LP and CK vs. HP.
R2VS.R4
Index	Formula	Compounds	Class I	Class II	Type
mws2125	C3H5O6P	Phosphoenolpyruvate	Organic acids	Organic acids	down
Zmzn000078	C3H7O6P	Dihydroxyacetone phosphate	Others	Saccharides and Alcohols	down
Zmgn000447	C3H7O7P	3-Phospho-D-glyceric acid	Others	Saccharides and Alcohols	down
mws1090	C6H13O9P	Glucose-1-phosphate*	Others	Saccharides and Alcohols	down
mws1521	C13H18O7	Salicin	Phenolic acids	Phenolic acids	up
R2VS.R5
Index	Formula	Compounds	Class I	Class II	Type
mws2125	C3H5O6P	Phosphoenolpyruvate	Organic acids	Organic acids	up
Zmgn000447	C3H7O7P	3-Phospho-D-glyceric acid	Others	Saccharides and Alcohols	up
mws1090	C6H13O9P	Glucose-1-phosphate*	Others	Saccharides and Alcohols	up
W2VS.W4
Index	Formula	Compounds	Class I	Class II	Type
mws1167	C4H4O5	Oxaloacetic acid	Organic acids	Organic acids	up
mws2125	C3H5O6P	Phosphoenolpyruvate	Organic acids	Organic acids	down
Zmzn000078	C3H7O6P	Dihydroxyacetone phosphate	Others	Saccharides and Alcohols	down
Zmgn000447	C3H7O7P	3-Phospho-D-glyceric acid	Others	Saccharides and Alcohols	down
mws1090	C6H13O9P	Glucose-1-phosphate*	Others	Saccharides and Alcohols	down
mws1521	C13H18O7	Salicin	Phenolic acids	Phenolic acids	up
W2VS.W5
NONE
