# Supplementary material for: Transcriptome and Metabolome Analyses Revealed the Response Mechanism of Quinoa Seedlings to Different Phosphorus Stresses
Source: Int J Mol Sci. 2022 Apr 24;23(9):4704. doi: 10.3390/ijms23094704 (PMC9105174; doi:10.3390/ijms23094704)
Supplement: Supplementary file 1 [file ijms-23-04704-s001.zip › Table.S7.xlsx]

## Sheet: Sheet1
Table S7. Transcriptome analysis of 18 quinoa seedling shoots.
Sample	Raw Reads	Clean Reads	Clean Base(G)	Error Rate(%)	Q20(%)	Q30(%)	GC Content(%)
R2-4	48936812	48569484	7.29	0.02	98.28	94.58	43.39
R2-5	47004294	46363050	6.95	0.03	97	91.81	43.57
R2-6	55174188	54550166	8.18	0.02	98.16	94.48	45.58
R4-4	47793468	45571338	6.84	0.03	97.94	93.94	43.07
R4-5	62287922	61448346	9.22	0.03	97.86	93.73	43.28
R4-6	73486840	69063344	10.36	0.02	98.07	94.42	43.17
R5-4	51436064	50911950	7.64	0.02	98.06	94.27	43.52
R5-5	50579146	50153334	7.52	0.02	98.37	94.88	43.92
R5-6	49564424	48320676	7.25	0.03	97.43	93	42.8
W2-4	45161648	44246504	6.64	0.03	97.26	92.33	45.87
W2-5	51997978	51326632	7.7	0.03	97.99	94.13	43.41
W2-6	54121012	53489678	8.02	0.03	97.99	94.19	43.61
W4-4	50100714	49595164	7.44	0.02	98.33	94.79	43.35
W4-5	54915372	53954516	8.09	0.03	96.97	91.71	43.1
W4-6	50199504	49527752	7.43	0.02	98.17	94.44	40.98
W5-4	61442868	60540438	9.08	0.03	97.79	93.95	42.96
W5-5	45339010	44253688	6.64	0.03	97.5	93.33	42.41
W5-6	50405942	49772484	7.47	0.02	98.34	94.78	43.66
