# Supplementary material for: Transcriptome and Metabolome Analyses Revealed the Response Mechanism of Quinoa Seedlings to Different Phosphorus Stresses
Source: Int J Mol Sci. 2022 Apr 24;23(9):4704. doi: 10.3390/ijms23094704 (PMC9105174; doi:10.3390/ijms23094704)
Supplement: Supplementary file 1 [file ijms-23-04704-s001.zip › Table.S8.xls]

## Sheet: 订单说明
常用的兼并碱基代码：
1	M=A,C
2	R=A,G
3	W=A,T
4	S=G,C
5	Y=C,T
6	K=G,T
7	V=A,G,C
8	H=A,C,T
9	D=A,G,T
10	B=G,C,T
11	N=A,G,C,T
注意事项：如客户未注明合成OD值，常规引物按2 OD合成，长链按1 OD合成，修饰引物按2 OD合成。
引物序列只填写ACGT，不要加其他字符，碱基数量自动计算。

## Sheet: 引物合成订单
Table S8.The Primer design of genes.
ID	Primer	Primer sequence(5'to3')	Base number	Total OD value
1	gene-LOC110694671F	GAACTGAGGCTTACTATG	18	2
2	gene-LOC110694671R	TAGACTGATTCCGATACA	18	2
3	gene-LOC110700716F	CCTGAAGAAGTATGGTTA	18	2
4	gene-LOC110700716R	GAATAAGTCTGGTTGGTA	18	2
5	gene-LOC110702180F	ATGGAGTCAAGAATCAGT	18	2
6	gene-LOC110702180R	AACCACCTATCACATACT	18	2
7	gene-LOC110705371F	GATTATGAAGGCTTGTTG	18	2
8	gene-LOC110705371R	AGGATAAGTTCTGATTGC	18	2
9	gene-LOC110705433F	GAGGAGCATTACTACAAT	18	2
10	gene-LOC110705433R	TAGGAGTGAGTCTGATAG	18	2
11	gene-LOC110708023F	GGTCTTCCAATCATTCTT	18	2
12	gene-LOC110708023R	CATTCTGCGACTATTCTT	18	2
13	gene-LOC110724999F	CTGAGGCTTACTATGATG	18	2
14	gene-LOC110724999R	TAGACTGATTCCGATACA	18	2
15	gene-LOC110725562F	TCGGAGGTTATTACAGTA	18	2
16	gene-LOC110725562R	ACCATCTTCATCTTCTTC	18	2
17	gene-LOC110736814F	CCATATCAACGGACAATA	18	2
18	gene-LOC110736814R	CTACTGCTTCTGAATCTC	18	2
19	gene-LOC110738477F	GTCACTATTAGGTCTCAG	18	2
20	gene-LOC110738477R	GGTAACTTCTCAACTCTT	18	2
45	TUB6 - F	TGAGAACGCAGATGAGTGTATG	22	4
46	TUB6 - R	GAAACGAAGACAGCAAGTGACA	22	4
